# Supplementary material for: Polyfluoroalkylated antipyrines in Pd-catalyzed transformations
Source: Royal Society of Chemistry journal article supplement (doi:10.1039/d1ra06967e), 2021-01-01

## Supporting Information

### Polyfluoroalkylated Antipyridines In Pd-Catalyzed Transformations

**Evgeny V. Shchegolkov<sup>a</sup>, Yanina V. Burgart<sup>a</sup>, Daria A. Matsneva<sup>a</sup>, Sophia S. Borisevich<sup>b</sup>,  
Renata A. Kadyrova<sup>c</sup>, Iana R. Orshanskaya<sup>c</sup>, Vladimir V. Zarubaev<sup>c</sup>, Victor I. Saloutin<sup>a\*</sup>**

<sup>a</sup> *Postovsky Institute of Organic Synthesis, Ural Branch of the Russian Academy of Sciences, S. Kovalevskoi St., 22, Ekaterinburg 620990, Russia.*

<sup>b</sup> *Ufa Institute of Chemistry, Russian Academy of Sciences, 71 October Ave., Ufa, 450054 Russia*

<sup>c</sup> *Saint Petersburg Pasteur Research Institute of Epidemiology and Microbiology, 14 Mira St., Saint-Petersburg, 197101, Russia*

\*e-mail: saloutin@ios.uran.ru

## Table of contents

|                                                                                                                                                                                                                                                             |    |
|-------------------------------------------------------------------------------------------------------------------------------------------------------------------------------------------------------------------------------------------------------------|----|
| Table S1. Direct C—H arylation of CF <sub>3</sub> -antipyridine <b>1a</b> (the best conditions for each type of aryl halogenide <b>2a-i</b> are highlighted in color: yellow – compound is not isolated; green – compound is yielded in the pure form)..... | 5  |
| Table S2. Optimization of the conditions for synthesis of 4-phenyl-5-trifluoromethyl-antipyridine <b>3a</b> from bromo-antipyridine <b>4a</b> .....                                                                                                         | 10 |
| Table S3. Optimization of the conditions for synthesis of 4-phenyl-5-trifluoromethyl-antipyridine <b>3a</b> from iodo-antipyridine <b>5a</b> .....                                                                                                          | 11 |
| Table S4. Optimization of the conditions for synthesis of 4-(phenylethynyl)-5-(trifluoromethyl)-antipyridine <b>6a</b> from bromo-antipyridine <b>4a</b> .....                                                                                              | 12 |
| Table S5. Optimization of the conditions for synthesis of 4-(phenylethynyl)-5-(trifluoromethyl)-antipyridine <b>6a</b> from iodo-antipyridine <b>5a</b> .....                                                                                               | 13 |
| Experimental.....                                                                                                                                                                                                                                           | 14 |
| Synthesis of 5-(polyfluoroalkyl)-antipyridines <b>1a-d</b> .....                                                                                                                                                                                            | 14 |
| Synthesis of 4-halogen-5-polyfluoroalkyl-antipyridines <b>4a-d, 5a,b</b> .....                                                                                                                                                                              | 14 |
| Synthesis of 4-aryl-5-(polyfluoroalkyl)-antipyridines <b>3a,c-l</b> .....                                                                                                                                                                                   | 16 |

|                                                                                                                        |    |
|------------------------------------------------------------------------------------------------------------------------|----|
| Synthesis of 1-methyl-2-phenyl-4-(phenylethynyl)-5-(polyfluoroalkyl)-1,2-dihydro-3H-pyrazolon-3-ones <b>6a,b</b> ..... | 19 |
| Biological testing.....                                                                                                | 20 |
| Evaluation of cytotoxic properties of compounds.....                                                                   | 21 |
| Evaluation of antiviral activity of compounds.....                                                                     | 21 |
| References.....                                                                                                        | 22 |
| Copies of <sup>1</sup> H, <sup>13</sup> C, and <sup>19</sup> F NMR spectra of compounds.....                           | 23 |
| <sup>1</sup> H NMR spectrum of compound <b>4a</b> in DMSO- <i>d</i> <sub>6</sub> .....                                 | 23 |
| <sup>13</sup> C NMR spectrum of compound <b>4a</b> in DMSO- <i>d</i> <sub>6</sub> .....                                | 24 |
| <sup>19</sup> F NMR spectrum of compound <b>4a</b> in DMSO- <i>d</i> <sub>6</sub> .....                                | 25 |
| <sup>1</sup> H NMR spectrum of compound <b>4b</b> in CDCl <sub>3</sub> .....                                           | 26 |
| <sup>13</sup> C NMR spectrum of compound <b>4b</b> in CDCl <sub>3</sub> .....                                          | 27 |
| <sup>19</sup> F NMR spectrum of compound <b>4b</b> in CDCl <sub>3</sub> .....                                          | 28 |
| <sup>1</sup> H NMR spectrum of compound <b>4c</b> in CDCl <sub>3</sub> .....                                           | 29 |
| <sup>13</sup> C NMR spectrum of compound <b>4c</b> in CDCl <sub>3</sub> .....                                          | 30 |
| <sup>19</sup> F NMR spectrum of compound <b>4c</b> in CDCl <sub>3</sub> .....                                          | 31 |
| <sup>1</sup> H NMR spectrum of compound <b>4d</b> in CDCl <sub>3</sub> .....                                           | 32 |
| <sup>13</sup> C NMR spectrum of compound <b>4d</b> in CDCl <sub>3</sub> .....                                          | 33 |
| <sup>19</sup> F NMR spectrum of compound <b>4d</b> in CDCl <sub>3</sub> .....                                          | 34 |
| <sup>1</sup> H NMR spectrum of compound <b>5a</b> in CDCl <sub>3</sub> .....                                           | 35 |
| <sup>13</sup> C NMR spectrum of compound <b>5a</b> in CDCl <sub>3</sub> .....                                          | 36 |
| <sup>19</sup> F NMR spectrum of compound <b>5a</b> in CDCl <sub>3</sub> .....                                          | 37 |
| <sup>1</sup> H NMR spectrum of compound <b>5b</b> in CDCl <sub>3</sub> .....                                           | 38 |
| <sup>13</sup> C NMR spectrum of compound <b>5b</b> in CDCl <sub>3</sub> .....                                          | 39 |
| <sup>19</sup> F NMR spectrum of compound <b>5b</b> in CDCl <sub>3</sub> .....                                          | 40 |
| <sup>1</sup> H NMR spectrum of compound <b>3a</b> in CDCl <sub>3</sub> .....                                           | 41 |
| <sup>13</sup> C NMR spectrum of compound <b>3a</b> in CDCl <sub>3</sub> .....                                          | 42 |

|                                                                                         |    |
|-----------------------------------------------------------------------------------------|----|
| <sup>19</sup> F NMR spectrum of compound <b>3a</b> in CDCl <sub>3</sub> .....           | 43 |
| <sup>1</sup> H NMR spectrum of compound <b>3c</b> in CDCl <sub>3</sub> .....            | 44 |
| <sup>19</sup> F NMR spectrum of compound <b>3c</b> in CDCl <sub>3</sub> .....           | 45 |
| <sup>1</sup> H NMR spectrum of compound <b>3d</b> in CDCl <sub>3</sub> .....            | 46 |
| <sup>13</sup> C NMR spectrum of compound <b>3d</b> in CDCl <sub>3</sub> .....           | 47 |
| <sup>19</sup> F NMR spectrum of compound <b>3d</b> in CDCl <sub>3</sub> .....           | 48 |
| <sup>1</sup> H NMR spectrum of compound <b>3e</b> in CDCl <sub>3</sub> .....            | 49 |
| <sup>13</sup> C NMR spectrum of compound <b>3e</b> in CDCl <sub>3</sub> .....           | 50 |
| <sup>19</sup> F NMR spectrum of compound <b>3e</b> in CDCl <sub>3</sub> .....           | 51 |
| <sup>1</sup> H NMR spectrum of compound <b>3f</b> in CDCl <sub>3</sub> .....            | 52 |
| <sup>13</sup> C NMR spectrum of compound <b>3f</b> in CDCl <sub>3</sub> .....           | 53 |
| <sup>19</sup> F NMR spectrum of compound <b>3f</b> in CDCl <sub>3</sub> .....           | 54 |
| <sup>1</sup> H NMR spectrum of compound <b>3g</b> in DMSO- <i>d</i> <sub>6</sub> .....  | 55 |
| <sup>13</sup> C NMR spectrum of compound <b>3g</b> in DMSO- <i>d</i> <sub>6</sub> ..... | 56 |
| <sup>19</sup> F NMR spectrum of compound <b>3g</b> in DMSO- <i>d</i> <sub>6</sub> ..... | 57 |
| <sup>1</sup> H NMR spectrum of compound <b>3h</b> in CDCl <sub>3</sub> .....            | 58 |
| <sup>13</sup> C NMR spectrum of compound <b>3h</b> in CDCl <sub>3</sub> .....           | 59 |
| <sup>19</sup> F NMR spectrum of compound <b>3h</b> in CDCl <sub>3</sub> .....           | 60 |
| <sup>1</sup> H NMR spectrum of compound <b>3i</b> in CDCl <sub>3</sub> .....            | 61 |
| <sup>13</sup> C NMR spectrum of compound <b>3i</b> in CDCl <sub>3</sub> .....           | 62 |
| <sup>19</sup> F NMR spectrum of compound <b>3i</b> in CDCl <sub>3</sub> .....           | 63 |
| <sup>1</sup> H NMR spectrum of compound <b>3j</b> in CDCl <sub>3</sub> .....            | 64 |
| <sup>13</sup> C NMR spectrum of compound <b>3j</b> in CDCl <sub>3</sub> .....           | 65 |
| <sup>19</sup> F NMR spectrum of compound <b>3j</b> in CDCl <sub>3</sub> .....           | 66 |
| <sup>1</sup> H NMR spectrum of compound <b>3k</b> in CDCl <sub>3</sub> .....            | 67 |
| <sup>13</sup> C NMR spectrum of compound <b>3k</b> in CDCl <sub>3</sub> .....           | 68 |

|                                                                               |    |
|-------------------------------------------------------------------------------|----|
| <sup>19</sup> F NMR spectrum of compound <b>3k</b> in CDCl <sub>3</sub> ..... | 69 |
| <sup>1</sup> H NMR spectrum of compound <b>3l</b> in CDCl <sub>3</sub> .....  | 70 |
| <sup>13</sup> C NMR spectrum of compound <b>3l</b> in CDCl <sub>3</sub> ..... | 71 |
| <sup>19</sup> F NMR spectrum of compound <b>3l</b> in CDCl <sub>3</sub> ..... | 72 |
| <sup>1</sup> H NMR spectrum of compound <b>6a</b> in CDCl <sub>3</sub> .....  | 73 |
| <sup>13</sup> C NMR spectrum of compound <b>6a</b> in CDCl <sub>3</sub> ..... | 74 |
| <sup>19</sup> F NMR spectrum of compound <b>6a</b> in CDCl <sub>3</sub> ..... | 75 |
| <sup>1</sup> H NMR spectrum of compound <b>6b</b> in CDCl <sub>3</sub> .....  | 76 |
| <sup>13</sup> C NMR spectrum of compound <b>6b</b> in CDCl <sub>3</sub> ..... | 77 |
| <sup>19</sup> F NMR spectrum of compound <b>6b</b> in CDCl <sub>3</sub> ..... | 78 |

**Table S1.** Direct C—H arylation of CF<sub>3</sub>-antipyryne **1a** (the best conditions for each type of aryl halogenide **2a-i** are highlighted in color: yellow – compound is not isolated; green – compound is yielded in the pure form).

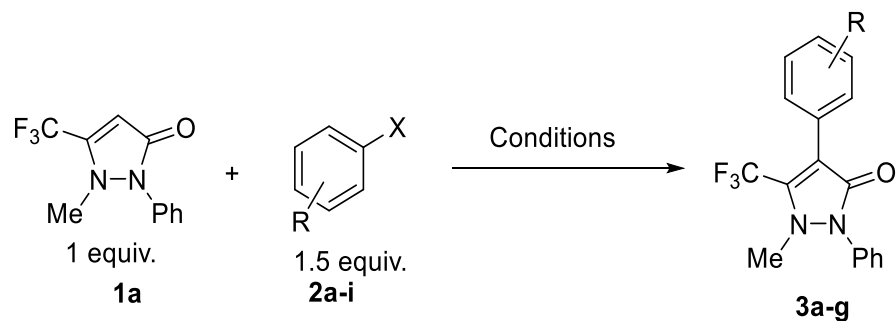

| Entry | Conditions                                                                                       |                                                                                                                                             | Products <b>3a-g</b>                                                                              | Ratio of components<br>(based on GLC mass spectrometry) |                                  |             | Preparative yield, % |
|-------|--------------------------------------------------------------------------------------------------|---------------------------------------------------------------------------------------------------------------------------------------------|---------------------------------------------------------------------------------------------------|---------------------------------------------------------|----------------------------------|-------------|----------------------|
|       | 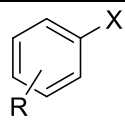<br><b>2a-g</b> | Catalyst, base, solvent, temperature, time                                                                                                  |                                                                                                   | Compound <b>3</b>                                       | The initial antipyryne <b>1a</b> | By-products |                      |
| 1.    | <br><b>2a</b>   | 0.005 equiv. Pd(OAc) <sub>2</sub> ,<br>2 equiv. AcOK,<br>CO(OEt) <sub>2</sub><br>150 °C, 24h                                                | <br><b>3a</b>   | 5                                                       | 60                               | 35          | 0                    |
| 2.    | <br><b>2a</b>  | 0.02 equiv. Pd <sub>2</sub> (dba) <sub>3</sub> ,<br>2 equiv. AcOK,<br>CO(OEt) <sub>2</sub><br>150-160 °C, 24h                               | <br><b>3a</b>  | 2                                                       | 60                               | 38          | -                    |
| 3.    | <br><b>2a</b> | 0.02 equiv. Pd <sub>2</sub> (dba) <sub>3</sub> , 0.04 equiv. XPhos,<br>2.5 equiv. K <sub>2</sub> CO <sub>3</sub> ,<br>EtOH-H <sub>2</sub> O | <br><b>3a</b> | 0                                                       | 89                               | 11          | -                    |

|    |                                                                                               |                                                                                                                                 |                                                                                                |    |    |    |    |
|----|-----------------------------------------------------------------------------------------------|---------------------------------------------------------------------------------------------------------------------------------|------------------------------------------------------------------------------------------------|----|----|----|----|
|    |                                                                                               | 100 °C, 24h                                                                                                                     |                                                                                                |    |    |    |    |
| 4. | 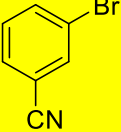 <b>2b</b>   | 0.02 equiv.<br>Pd(OAc) <sub>2</sub> ,<br>1.3 equiv. K <sub>3</sub> PO <sub>4</sub> ,<br>CO(OEt) <sub>2</sub><br>150-160 °C, 24h |  <b>3b</b>   | 12 | 54 | 34 | 0  |
| 5. |  <b>2c</b>   | 0.02 equiv.<br>Pd(OAc) <sub>2</sub> ,<br>1.3 equiv. K <sub>3</sub> PO <sub>4</sub> ,<br>CO(OEt) <sub>2</sub><br>150-160 °C, 24h |  <b>3c</b>   | 13 | 56 | 31 | 0  |
| 6. |  <b>2d</b>   | 0.02 equiv.<br>Pd(OAc) <sub>2</sub> ,<br>1.3 equiv. K <sub>3</sub> PO <sub>4</sub> ,<br>CO(OEt) <sub>2</sub><br>150-160 °C, 24h |  <b>3c</b>   | 21 | 54 | 25 | 10 |
| 7. |  <b>2d</b>   | 0.02 equiv.<br>Pd(OAc) <sub>2</sub> ,<br>1.3 equiv. AcOK,<br>CO(OEt) <sub>2</sub><br>150-160 °C, 24h                            |  <b>3c</b>   | 10 | 55 | 35 | -  |
| 8. |  <b>2e</b>  | 0.02 equiv.<br>Pd(OAc) <sub>2</sub> ,<br>1 equiv. AcOK,<br>CO(OEt) <sub>2</sub><br>150-160 °C, 24h                              |  <b>3d</b>  | 16 | 74 | 9  | -  |
| 9. |  <b>2e</b> | 0.02 equiv.<br>Pd(OAc) <sub>2</sub> ,<br>1.3 equiv. AcOK,<br>CO(OEt) <sub>2</sub><br>150-160 °C, 24h                            |  <b>3d</b> | 20 | 56 | 23 | 12 |

|     |                                                                                               |                                                                                                                                 |                                                                                                |                |    |    |   |
|-----|-----------------------------------------------------------------------------------------------|---------------------------------------------------------------------------------------------------------------------------------|------------------------------------------------------------------------------------------------|----------------|----|----|---|
| 10. | 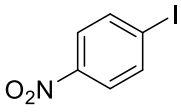 <b>2e</b>   | 0.02 equiv.<br>Pd(OAc) <sub>2</sub> ,<br>1.5 equiv. AcOK,<br>CO(OEt) <sub>2</sub><br>150-160 °C, 24h                            |  <b>3d</b>   | 6              | 82 | 12 | - |
| 11. |  <b>2e</b>   | 0.02 equiv.<br>Pd(OAc) <sub>2</sub> ,<br>2 equiv. AcOK,<br>CO(OEt) <sub>2</sub><br>150-160 °C, 24h                              |  <b>3d</b>   | 9              | 47 | 43 | - |
| 12. |  <b>2e</b>   | 0.02 equiv.<br>Pd(OAc) <sub>2</sub> ,<br>1.3 equiv. AcOK,<br>DMA<br>150-160 °C, 24h                                             |  <b>3d</b>   | resinification |    |    | - |
| 13. |  <b>2e</b>   | 0.02 equiv.<br>Pd(OAc) <sub>2</sub> ,<br>1.3 equiv. AcOK,<br>toluene<br>150-160 °C, 24h                                         |  <b>3d</b>   | 1              | 79 | 20 | - |
| 14. |  <b>2e</b>  | 0.02equiv.<br>Pd(OAc) <sub>2</sub> ,<br>1.3 equiv. AcOK,<br>1,4-dioxane<br>150-160 °C, 24h                                      |  <b>3d</b>  | 5              | 73 | 22 | - |
| 15. |  <b>2e</b> | 0.02 equiv.<br>Pd(OAc) <sub>2</sub> ,<br>1.3 equiv. K <sub>2</sub> CO <sub>3</sub> ,<br>CO(OEt) <sub>2</sub><br>150-160 °C, 24h |  <b>3d</b> | 4              | 80 | 15 | - |

|     |                                                                                                  |                                                                                                                                                                 |                                                                                                   |   |    |    |   |
|-----|--------------------------------------------------------------------------------------------------|-----------------------------------------------------------------------------------------------------------------------------------------------------------------|---------------------------------------------------------------------------------------------------|---|----|----|---|
| 16. | 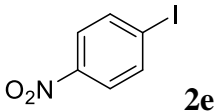<br><b>2e</b>   | 0.02 equiv.<br>Pd(OAc) <sub>2</sub> ,<br>1.3 equiv. AcOK,<br>toluene<br>150-160 °C, 24h                                                                         | <br><b>3d</b>   | 1 | 79 | 20 | - |
| 17. | <br><b>2e</b>   | 0.02 equiv.<br>Pd(OAc) <sub>2</sub> ,<br>1.3 equiv. AcOK,<br>1,4-dioxane<br>150-160 °C, 24h                                                                     | <br><b>3d</b>   | 5 | 73 | 22 | - |
| 18. | <br><b>2e</b>   | 0.02 equiv.<br>Pd(OAc) <sub>2</sub> ,<br>1.3 equiv. K <sub>2</sub> CO <sub>3</sub> ,<br>CO(OEt) <sub>2</sub><br>150-160 °C, 24h                                 | <br><b>3d</b>   | 4 | 80 | 15 | - |
| 19. | <br><b>2e</b>   | 0.02 equiv.<br>Pd(OAc) <sub>2</sub> ,<br>1.3 equiv. Cs <sub>2</sub> CO <sub>3</sub> ,<br>CO(OEt) <sub>2</sub><br>150-160 °C, 24h                                | <br><b>3d</b>   | 0 | 81 | 15 | - |
| 20. | <br><b>2e</b>  | 0.02 equiv.<br>Pd(OAc) <sub>2</sub> ,<br>1.3 equiv. K <sub>3</sub> PO <sub>4</sub> ,<br>CO(OEt) <sub>2</sub><br>150-160 °C, 24h                                 | <br><b>3d</b>  | 6 | 76 | 18 | - |
| 21. | <br><b>2e</b> | 0.02 equiv.<br>Pd <sub>2</sub> (dba) <sub>3</sub> , 0.04<br>equiv. XPhos,<br>2.5 equiv. K <sub>2</sub> CO <sub>3</sub> ,<br>EtOH-H <sub>2</sub> O<br>100 °C, 8h | <br><b>3d</b> | 0 | 53 | 27 | - |



|     |                                                                                               |                                                                                                                                               |                                                                                                |    |    |    |    |
|-----|-----------------------------------------------------------------------------------------------|-----------------------------------------------------------------------------------------------------------------------------------------------|------------------------------------------------------------------------------------------------|----|----|----|----|
| 22. | 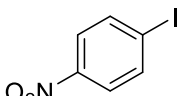 <b>2e</b>   | 0.02 equiv.<br>Pd <sub>2</sub> (dba) <sub>3</sub> , 0.04<br>equiv. XPhos,<br>2 equiv. AcOK,<br>CO(OEt) <sub>2</sub><br>150-160 °C, 24h        |  <b>3d</b>   | 5  | 45 | 50 | -  |
| 23. |  <b>2e</b>   | 0.02 equiv.<br>Pd <sub>2</sub> (dba) <sub>3</sub> ,<br>1.3 equiv. K <sub>3</sub> PO <sub>4</sub> ,<br>CO(OEt) <sub>2</sub><br>150-160 °C, 24h |  <b>3d</b>   | 8  | 78 | 12 | -  |
| 24. |  <b>2f</b>   | 0.02 equiv.<br>Pd(OAc) <sub>2</sub> ,<br>1.3 equiv. K <sub>3</sub> PO <sub>4</sub> ,<br>CO(OEt) <sub>2</sub><br>150-160 °C, 24h               |  <b>3d</b>   | 42 | 38 | 20 | 27 |
| 25. |  <b>2g</b>   | 0.02 equiv.<br>Pd(OAc) <sub>2</sub> ,<br>1.3 equiv. K <sub>3</sub> PO <sub>4</sub> ,<br>CO(OEt) <sub>2</sub><br>150-160 °C, 24h               |  <b>3e</b>   | 7  | 54 | 39 | 0  |
| 26. |  <b>2h</b>  | 0.02 equiv.<br>Pd(OAc) <sub>2</sub> ,<br>1.3 equiv. K <sub>3</sub> PO <sub>4</sub> ,<br>CO(OEt) <sub>2</sub><br>150-160 °C, 24h               |  <b>3e</b>  | 40 | 47 | 13 | 25 |
| 27. |  <b>2i</b> | 0.02 equiv.<br>Pd(OAc) <sub>2</sub> ,<br>1.3 equiv. K <sub>3</sub> PO <sub>4</sub> ,<br>CO(OEt) <sub>2</sub><br>150-160 °C, 24h               |  <b>3f</b> | 32 | 52 | 16 | 23 |

**Table S2.** Optimization of the conditions for synthesis of 4-phenyl-5-trifluoromethyl-antipyrene **3a** from bromo-antipyrene **4a**

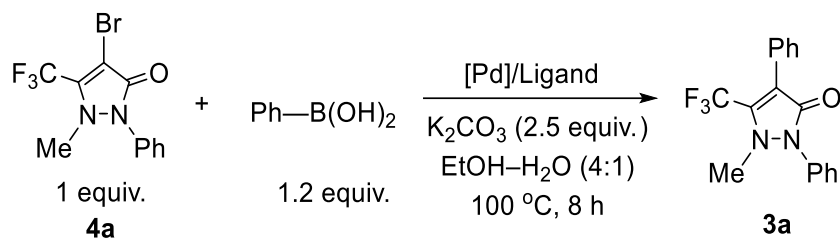

| Entry          | Conditions                                                |                                        | Ratio of components (based on GLC mass spectrometry) |                                 |                                              |            |
|----------------|-----------------------------------------------------------|----------------------------------------|------------------------------------------------------|---------------------------------|----------------------------------------------|------------|
|                | [Pd]                                                      | Ligand                                 | Product <b>3a</b>                                    | Initial Br-antipyrene <b>4a</b> | Debromination product – antipyrene <b>1a</b> | Impurities |
| 1 <sup>a</sup> | 0.05 equiv. $\text{Pd(PPh}_3)_4$                          |                                        | 2                                                    | 85                              | 3                                            | 10         |
| 2              | 0.05 equiv. $\text{Pd(PPh}_3)_4$                          |                                        | 72                                                   | -                               | 10                                           | 18         |
| 3              | 0.02 equiv. $\text{Pd}_2(\text{dba})_3$                   | 0.04 equiv. $\text{P}(o\text{-Tol})_3$ | 76                                                   | 2                               | <b>11</b>                                    | <b>11</b>  |
| 4              | 0.02 equiv. $\text{Pd}_2(\text{dba})_3$                   | 0.04 equiv. $\text{P}(p\text{-Tol})_3$ | 62                                                   | 3                               | 14                                           | 21         |
| <b>5</b>       | <b>0.02 equiv. <math>\text{Pd}_2(\text{dba})_3</math></b> | <b>0.04 equiv. XPhos</b>               | <b>86</b>                                            | -                               | <b>6</b>                                     | <b>8</b>   |
| 6              | 0.02 equiv. $\text{Pd}_2(\text{dba})_3$                   | 0.04 equiv. Xantphos                   | 81                                                   | -                               | 4                                            | 15         |
| 7              | 0.02 equiv. $\text{Pd}_2(\text{dba})_3$                   | 0.04 equiv. BINAP                      | 76                                                   | -                               | 8                                            | 16         |
| 8 <sup>b</sup> | 0.02 equiv. $\text{Pd}_2(\text{dba})_3$                   | 0.04 equiv. XPhos                      | 62                                                   | -                               | 5                                            | 33         |

<sup>a</sup> Solvent - THF-H<sub>2</sub>O (3:4)

<sup>b</sup> Reaction was performed in a closed vial in microwave synthesizer “CEM Discover”, MW 100 Wt, 100°C, 8 h

**Table S3.** Optimization of the conditions for synthesis of 4-phenyl-5-trifluoromethyl-antipyrene **3a** from iodo-antipyrene **5a**

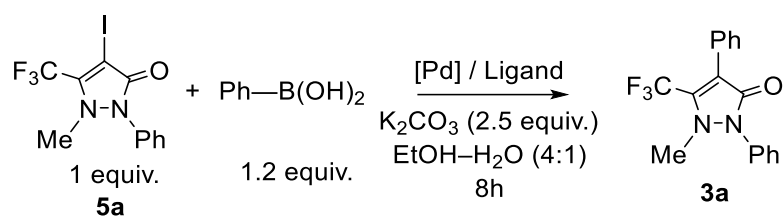

| Entry                | Conditions                                         |                          |           | Ratio of components (based on GLC mass spectrometry) |                                |                                           |            |
|----------------------|----------------------------------------------------|--------------------------|-----------|------------------------------------------------------|--------------------------------|-------------------------------------------|------------|
|                      | [Pd]                                               | Ligand                   | T, °C     | Product <b>3a</b>                                    | Initial I-antipyrene <b>5a</b> | Deiodation product – antipyrene <b>1a</b> | Impurities |
| 1                    | 0.05 equiv. Pd(PPh <sub>3</sub> ) <sub>4</sub>     |                          | 100       | 25                                                   | -                              | 47                                        | 28         |
| 2                    | 0.02 equiv. Pd <sub>2</sub> (dba) <sub>3</sub>     | 0.04 equiv. Xantphos     | 100       | 33                                                   | -                              | 59                                        | 8          |
| 3                    | 0.02 equiv. Pd <sub>2</sub> (dba) <sub>3</sub>     | 0.04 equiv. BINAP        | 100       | 27                                                   | -                              | 57                                        | 16         |
| 4                    | 0.02 equiv. Pd <sub>2</sub> (dba) <sub>3</sub>     | 0.04 equiv. XPhos        | 100       | 32                                                   | -                              | 55                                        | 13         |
| 5 <sup>a</sup>       | 0.02 equiv. Pd <sub>2</sub> (dba) <sub>3</sub>     | 0.04 equiv. XPhos        | 100       | 32                                                   | -                              | 60                                        | 8          |
| <b>6<sup>b</sup></b> | <b>0.02 equiv. Pd<sub>2</sub>(dba)<sub>3</sub></b> | <b>0.04 equiv. XPhos</b> | <b>rt</b> | <b>100</b>                                           | -                              | -                                         | -          |
| 7 <sup>b</sup>       | 0.05 equiv. Pd(PPh <sub>3</sub> ) <sub>4</sub>     |                          | rt        | 31                                                   | -                              | 42                                        | 27         |

<sup>a</sup> Base Cs<sub>2</sub>CO<sub>3</sub> (2.5 equiv.)

<sup>b</sup> Time of reaction is 72 h

**Table S4.** Optimization of the conditions for synthesis of 4-(phenylethynyl)-5-(trifluoromethyl)-antipyrene **6a** from bromo-antipyrene **4a**

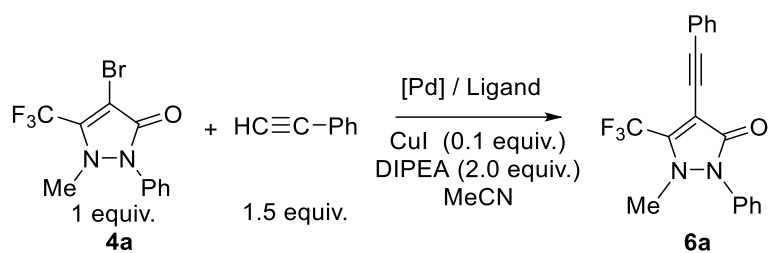

| Entry | Conditions                              |                               |       |         | Ratio of components (based on GLC mass spectrometry) |                                 |                                 |                                         |
|-------|-----------------------------------------|-------------------------------|-------|---------|------------------------------------------------------|---------------------------------|---------------------------------|-----------------------------------------|
|       | [Pd]                                    | Ligand                        | T, °C | Time, h | Product <b>6a</b>                                    | Initial Br-antipyrene <b>4a</b> | Debromination product <b>1a</b> | 1,4-diphenyl-1,3-butadiyne + impurities |
| 1     | 0.05 equiv. $\text{Pd}(\text{PPh}_3)_4$ |                               | 80    | 12      | 29                                                   | 36                              | -                               | 35                                      |
| 2     | 0.05 equiv. $\text{Pd}(\text{PPh}_3)_4$ |                               | 100   | 6       | 35                                                   | 12                              | -                               | 53                                      |
| 3     | 0.02 equiv. $\text{Pd}_2(\text{dba})_3$ | 0.04 equiv. $\text{BINAP}$    | 80    | 12      | 8                                                    | 49                              | -                               | 43                                      |
| 4     | 0.02 equiv. $\text{Pd}_2(\text{dba})_3$ | 0.04 equiv. $\text{Xantphos}$ | 80    | 12      | 30                                                   | 34                              | -                               | 36                                      |
| 5     | 0.02 equiv. $\text{Pd}_2(\text{dba})_3$ | 0.04 equiv. $\text{XPhos}$    | 80    | 12      | 18                                                   | 37                              | 1                               | 44                                      |
| 6     | 0.02 equiv. $\text{Pd}_2(\text{dba})_3$ | 0.04 equiv. $\text{XPhos}$    | 100   | 6       | 36                                                   | 17                              | 1                               | 46                                      |

**Table S5.** Optimization of the conditions for synthesis of 4-(phenylethynyl)-5-(trifluoromethyl)-antipyridine **6a** from iodo-antipyridine **5a**

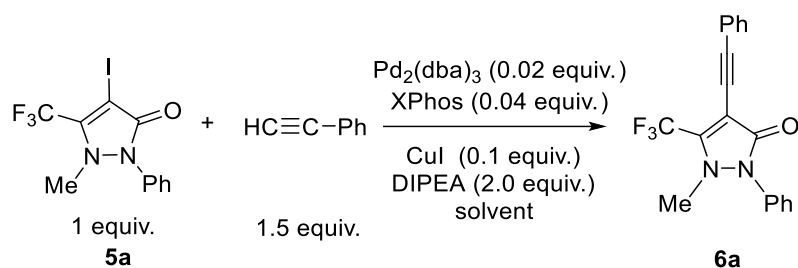

| Entry    | Conditions          |           |           | Ratio of components (based on GLC mass spectrometry) |                                  |                              |                                         |
|----------|---------------------|-----------|-----------|------------------------------------------------------|----------------------------------|------------------------------|-----------------------------------------|
|          | Solvent             | T, °C     | Time, h   | Product <b>6a</b>                                    | Initial I-antipyridine <b>5a</b> | Deiodation product <b>1a</b> | 1,4-diphenyl-1,3-butadiyne + impurities |
| 1        | Toluene             | 100       | 14        | 2                                                    | -                                | 8                            | 90                                      |
| 2        | 1,4-Dioxane         | 100       | 14        | 13                                                   | -                                | 48                           | 39                                      |
| 3        | Acetonitrile        | 100       | 14        | 25                                                   | -                                | 45                           | 30                                      |
| 4        | Acetonitrile        | 50        | 4         | 35                                                   | -                                | 43                           | 23                                      |
| 5        | Acetonitrile        | rt        | 4         | 25                                                   | 70                               | -                            | 5                                       |
| <b>6</b> | <b>Acetonitrile</b> | <b>rt</b> | <b>72</b> | <b>75</b>                                            | -                                | -                            | <b>25</b>                               |

## Experimental

All solvents, chemicals, and reagents were obtained commercially and used without purification. Melting points were measured in open capillaries on a Stuart SMP30 melting point apparatus and were uncorrected. The IR spectra were recorded on Perkin Elmer «Spectrum Two» using frustrated total internal reflection accessory with diamond crystal at  $\nu$  4000–400  $\text{cm}^{-1}$ . The  $^1\text{H}$  and  $^{19}\text{F}$  NMR spectra were registered on a Bruker DRX-400 (400 or 376 MHz, respectively) or a Bruker Avance<sup>III</sup> 500 (500 or 470 MHz, respectively). The  $^{13}\text{C}$  NMR spectra were recorded on a Bruker Avance<sup>III</sup> 500 (125 MHz). The internal standard is  $\text{SiMe}_4$  (for  $^1\text{H}$  and  $^{13}\text{C}$  NMR spectra) and  $\text{C}_6\text{F}_6$  (for  $^{19}\text{F}$  NMR spectra,  $\delta$  –162.9 ppm). The microanalyses (C, H, N) were carried out on a PerkinElmer PE 2400 series II elemental analyzer. The column chromatography was performed on Silica gel 60 (0.062–0.2 mm).

### Crystallographic data

The X-ray studies were performed on “Xcalibur 3 CCD” diffractometer with graphite monochromator,  $\omega$  scanning with  $1^\circ$  step,  $\lambda(\text{MoK}\alpha)$  0.71073 Å radiation,  $T$  295(2) K. Empirical absorption correction was applied. Using Olex2 [1], the structure was solved with the ShelXS structure solution program using Direct Methods and refined with the ShelXL [2] refinement package using Least Squares minimization. All non-hydrogen atoms were refined in the anisotropic approximation; H-atoms of the OH-groups were localized from the electron density peaks and refined independently; H-atoms at the C-H bonds were refined in the “rider” model with dependent displacement parameters. Empirical absorption correction was carried out through spherical harmonics, implemented in SCALE3 ABSPACK scaling algorithm by a program “CrysAlisPro 1.171.39.38a” (Rigaku Oxford Diffraction, 2017).

### Synthesis of 5-(polyfluoroalkyl)-antipyrines **1a-d**

The initial antipyrines **1a-d** were synthesized by the known method [3].

### Synthesis of 4-halogen-5-polyfluoroalkyl-antipyrines **4a-d**, **5a,b**.

A mixture of antipyrine **1a-d** (1 mmol) and N-halogensuccinimide (1.2 mmol) in  $\text{CHCl}_3$  (20 ml) was stirring at the room temperature for 3–4 h. Then, it was added water (20 ml), the organic lay was separated, dried over  $\text{Na}_2\text{SO}_4$  and distilled off on a rotary evaporator. The residue was re-crystallized from *n*-hexane.

**4-Bromo-1-methyl-2-phenyl-5-(trifluoromethyl)-1,2-dihydro-3H-pyrazol-3-one (4a).** Yield 85%, light-yellow powder, mp 79–80 °C.  $^1\text{H}$  NMR ( $\text{DMSO-}d_6$ , 400 MHz):  $\delta$  3.22 (s, 3H, Me); 7.46–7.49, 7.46–7.61 (all m, 5H, Ph).  $^{13}\text{C}$  NMR ( $\text{DMSO-}d_6$ , 125 MHz):  $\delta$  37.74 (Me); 92.80 (q,  $J$  2.8 Hz, C—Br); 118.96 (q,  $J$  272.8 Hz,  $\text{CF}_3$ ); 125.76, 128.66, 129.49, 132.39 (Ph); 140.23 (q,  $J$  37.0 Hz,  $\underline{\text{C}}$ — $\text{CF}_3$ ); 159.11 (C=O).  $^{19}\text{F}$  NMR ( $\text{DMSO-}d_6$ , 376 MHz):  $\delta$  102.85 (s,  $\text{CF}_3$ ). IR:  $\nu$

1690 (C=O); 1489, 1457, 1400 (C=C); 1061-1172 (CF), 704-759 (CBr)  $\text{cm}^{-1}$ . Anal. calcd for  $\text{C}_{11}\text{H}_8\text{BrF}_3\text{N}_2\text{O}$ : C, 41.15; H, 2.51; N, 8.72. Found: C, 41.23; H, 2.67; N, 8.79.

**4-Bromo-1-methyl-5-(pentafluoroethyl)-2-phenyl-1,2-dihydro-3H-pyrazol-3-one (4b).**

Yield 83%, white powder, mp 95 °C.  $^1\text{H}$  NMR ( $\text{CDCl}_3$ , 400 MHz):  $\delta$  3.20 (s, 3H, Me); 7.41-7.43, 7.51-7.53 (both m, 5H, Ph).  $^{13}\text{C}$  NMR ( $\text{CDCl}_3$ , 125 MHz):  $\delta$  38.60-38.66 (m, Me); 98.74 (t,  $J$  1.9 Hz, C—Br); 109.98 (tq,  $J$  258.5, 41.3 Hz,  $\text{CF}_2$ ); 118.37 (qt,  $J$  287.5, 37.0 Hz,  $\text{CF}_3$ ); 125.11, 128.59, 129.64, 132.84 (Ph); 140.67 (t,  $J$  27.1 Hz,  $\underline{\text{C}}$ — $\text{CF}_2$ ); 160.09 (C=O).  $^{19}\text{F}$  NMR ( $\text{CDCl}_3$ , 376 MHz):  $\delta$  49.22-49.23 (m, 2F,  $\text{CF}_2$ ), 78.60 (t,  $J$  3.3 Hz, 3F,  $\text{CF}_3$ ). IR:  $\nu$  1687 (C=O); 1487, 1458, 1330 (C=C); 1113-1210 (CF)  $\text{cm}^{-1}$ . Anal. calcd for  $\text{C}_{12}\text{H}_8\text{BrF}_5\text{N}_2\text{O}$ : C, 38.84; H, 2.17; N, 7.55. Found: C, 38.96; H, 2.17; N, 7.71.

**4-Bromo-5-(heptafluoropropyl)-1-methyl-2-phenyl-1,2-dihydro-3H-pyrazol-3-one**

**(4c).** Yield 79%, white powder, mp 97-98 °C.  $^1\text{H}$  NMR ( $\text{CDCl}_3$ , 400 MHz):  $\delta$  3.20 (s, 3H, Me); 7.41-7.42, 7.51-7.53 (both m, 5H, Ph).  $^{13}\text{C}$  NMR ( $\text{CDCl}_3$ , 125 MHz):  $\delta$  38.64-38.71 (m, Me); 99.03 (unsolv. t, C—Br); 108.76 (tq,  $J$  266.8, 33.6 Hz,  $\beta$ - $\text{CF}_2$ ); 112.07 (tt,  $J$  259.7, 38.5 Hz,  $\alpha$ - $\text{CF}_2$ ); 117.49 (qt,  $J$  288.0, 33.6 Hz,  $\text{CF}_3$ ); 125.19, 128.65, 129.62, 132.85 (Ph); 140.65 (t,  $J$  27.5 Hz,  $\underline{\text{C}}$ — $\text{CF}_2$ );  $\delta$  160.13 (C=O).  $^{19}\text{F}$  NMR ( $\text{CDCl}_3$ , 376 MHz):  $\delta$  36.34-36.40 (m, 2F,  $\text{CF}_2$ ); 52.15-52.21 (m, 2F,  $\text{CF}_2$ ); 81.68 (t,  $J$  9.7 Hz, 3F,  $\text{CF}_3$ ). IR:  $\nu$  1695 (C=O), 1497, 1459, 1388, 1337 (C=C), 1236-1109 (CF)  $\text{cm}^{-1}$ . Anal. calcd for  $\text{C}_{13}\text{H}_8\text{BrF}_7\text{N}_2\text{O}$ : C, 37.08; H, 1.19; N, 6.75. Found: C, 37.09; H, 2.14; N, 6.75.

**4-Bromo-1-methyl-5-(nonafluorobutyl)-2-phenyl-1,2-dihydro-3H-pyrazol-3-one (4d).**

Yield 75%, white powder, mp 99-100 °C.  $^1\text{H}$  NMR ( $\text{CDCl}_3$ , 400 MHz):  $\delta$  3.20 (s, 3H, Me); 7.40-7.44, 7.51-7.55 (both m, 5H, Ph).  $^{13}\text{C}$  NMR ( $\text{CDCl}_3$ , 125 MHz):  $\delta$  38.67-38.68 (m, Me); 99.14 (unsolv. t, C—Br); 108.50-114.76 (m, 3 $\text{CF}_2$ ); 117.25 (qt,  $J$  288.6, 33.0 Hz,  $\text{CF}_3$ ); 125.19, 128.65, 129.66, 132.85 (Ph); 140.66 (t,  $J$  27.6 Hz,  $\underline{\text{C}}$ — $\text{CF}_2$ );  $\delta$  160.13 (C=O).  $^{19}\text{F}$  NMR ( $\text{CDCl}_3$ , 376 MHz):  $\delta$  35.83-35.92, 39.97-40.00, 52.87-52.94 (all m, 6F, 3 $\text{CF}_2$ ); 80.94-81.00 (m, 3F,  $\text{CF}_3$ ). IR:  $\nu$  1677 (C=O), 1497, 1462, 1396 (C=C), 1114-1217 (CF)  $\text{cm}^{-1}$ . Anal. calcd for  $\text{C}_{14}\text{H}_8\text{BrF}_9\text{N}_2\text{O}$ : C, 35.69; H, 1.71; N, 3.40. Found: C, 35.78; H, 1.91; N, 6.09.

**4-Iodo-1-methyl-2-phenyl-5-(trifluoromethyl)-1,2-dihydro-3H-pyrazol-3-one (5a).**

Yield 80%, yellow powder, mp 85 °C.  $^1\text{H}$  NMR ( $\text{CDCl}_3$ , 400 MHz):  $\delta$  3.24 (s, 3H, Me); 7.40-7.43, 7.49-7.53 (both m, 5H, Ph).  $^{13}\text{C}$  NMR ( $\text{CDCl}_3$ , 125 MHz):  $\delta$  38.26 (q,  $J$  2.0 Hz, Me); 64.90 (q,  $J$  2.1 Hz, C—I); 118.86 (q,  $J$  273.3 Hz,  $\text{CF}_3$ ); 124.78, 128.31, 129.56, 132.99 (Ph); 145.97 (q,  $J$  37.1 Hz,  $\underline{\text{C}}$ — $\text{CF}_3$ ); 162.12 (C=O).  $^{19}\text{F}$  NMR ( $\text{CDCl}_3$ , 376 MHz):  $\delta$  101.31 (s,  $\text{CF}_3$ ). IR:  $\nu$  1661 (C=O), 1594, 1552, 1496 (C=C), 1024-1245 (CF)  $\text{cm}^{-1}$ . Anal. calcd for  $\text{C}_{11}\text{H}_8\text{F}_3\text{IN}_2\text{O}$ : C, 35.89; H, 2.19; N, 7.61. Found: C, 36.10; H, 2.23; N, 7.69.

**4-Iodo-1-methyl-5-(pentafluoroethyl)-2-phenyl-1,2-dihydro-3H-pyrazol-3-one (5b).**

Yielded 75 %, yellow powder, mp 80 °C. <sup>1</sup>H NMR (CDCl<sub>3</sub>, 400 MHz): δ 3.23 (s, 3H, Me); 7.40-7.42, 7.50-7.54 (both m, 5H, Ph). <sup>13</sup>C NMR (CDCl<sub>3</sub>, 125 MHz): δ 38.72 (br.s, Me); 68.08 (unsolv. t, C-I); 109.75 (tq, *J* 258.7, 41.1 Hz, CF<sub>2</sub>); 118.31 (qt, *J* 287.7, 37.0 Hz, CF<sub>2</sub>); 125.17, 128.54, 129.60 (Ph); 143.92 (t, *J* 27.0 Hz, C—CF<sub>2</sub>); 162.20 (C=O). <sup>19</sup>F NMR (CDCl<sub>3</sub>, 376 MHz): δ 50.33 (q, *J* 3.5 Hz, CF<sub>2</sub>), 78.96 (t, *J* 3.5 Hz, CF<sub>3</sub>). IR: ν 1667 (C=O), 1496, 1485, 1457 (C=C), 1019-1213 (CF) cm<sup>-1</sup>. Anal. calcd for C<sub>12</sub>H<sub>8</sub>F<sub>5</sub>IN<sub>2</sub>O: C, 34.73; H, 1.93; N, 6.70. Found: C, 34.69; H, 1.91; N, 6.86.

**Synthesis of 4-aryl-5-(polyfluoroalkyl)-antipyrines 3a,c-l**

*Method A.* A screw-neck vial was flushed with argon and charged with 4-bromo-5-(polyfluoroalkyl)-antipyrine **4a-d** (1 mmol), arylboronic acid (1.2 mmol) (phenylboronic acid - 122 mg, (4-(methylthio)phenyl)boronic acid - 168 mg), XPhos (0.04 mmol, 19 mg), Pd<sub>2</sub>(dba)<sub>3</sub> (0.02 mmol, 18 mg), K<sub>2</sub>CO<sub>3</sub> (2.5 mmol, 345 mg), EtOH (4 ml), and water (1 ml). The vial was repeatedly flushed with argon, closed tightly and heated at 100 °C for 8 h. After cooling, another portion of ethanol (20 ml) was added and a mixture was filtered through a small quantity of silica gel. The solvent was evaporated in vacuo, and the residue was purified by column chromatography on silica gel using a mixture of CHCl<sub>3</sub> and EtOAc (4:1).

*Method B.* Similarly to method A from 1 mmol of 4-iodo-5-(polyfluoroalkyl)-antipyrine **5a,b** at the room temperature for 72 h.

*Method C.* A screw-neck vial was flushed with argon and charged with 5-(trifluoromethyl)-antipyrine **1a** (1 mmol, 242 mg), arylhalogenide (1.5 mmol), Pd(OAc)<sub>2</sub> (0.02 mmol, 4.5 mg), K<sub>3</sub>PO<sub>4</sub> (1.3 mmol, 275 mg), and diethyl carbonate (4 ml). The vial was repeatedly flushed with argon, closed tightly and heated at 150-160 °C for 20 h. After cooling, the solvent was evaporated in vacuo, and the residue was purified by column chromatography on silica gel using a mixture of *n*-hexane and EtOAc (4:1).

**2,4-Diphenyl-1-methyl-5-(trifluoromethyl)-1,2-dihydro-3H-pyrazol-3-one (3a).** Yield 69% (*method A*), 89% (*method B*), white powder, mp 94-95 °C. <sup>1</sup>H NMR (CDCl<sub>3</sub>, 500 MHz): δ 3.25 (s, 3H, Me); 7.34-7.43, 7.47-7.49, 7.50-7.52 (all m, 10H, 2 Ph). <sup>13</sup>C NMR (CDCl<sub>3</sub>, 125 MHz): δ 38.13 (Me); 117.93 (=C—Ph); 119.91 (q, *J* 272.9 Hz, CF<sub>3</sub>); 124.46, 127.67, 128.09, 128.15, 128.59, 129.42, 129.77, 133.40 (2 Ph); 140.86 (q, *J* 36.8 Hz, C—CF<sub>3</sub>); 162.44 (C=O). <sup>19</sup>F NMR (CDCl<sub>3</sub>, 470 MHz): δ 102.96 (s, CF<sub>3</sub>). IR: 1678 (C=O), 1413, 1450, 1495, 1596 (C=C), 1076-1153 (CF) cm<sup>-1</sup>. Anal. calcd for C<sub>17</sub>H<sub>13</sub>F<sub>3</sub>N<sub>2</sub>O: C, 64.15; H, 4.12; N, 8.80. Found: C, 63.67; H, 4.00; N, 8.56.



**1-Methyl-2-phenyl-5-(trifluoromethyl)-4-[4-(cyano)phenyl]-1,2-dihydro-3H-pyrazol-3-one (3c):antipyrene (1a) – 83:17.** Yield 10% (*method C*). <sup>1</sup>H NMR (CDCl<sub>3</sub>, 500 MHz): δ 3.32 (s, 3H, Me); 7.40-7.56 (m, 5H, Ph); 7.61, 7.70 (both d, *J* 8.3 Hz, 4H, C<sub>6</sub>H<sub>4</sub>). <sup>19</sup>F NMR (CDCl<sub>3</sub>, 470 MHz): δ 103.05 (s, CF<sub>3</sub>).

**1-Methyl-2-phenyl-5-(trifluoromethyl)-4-[4-(nitro)phenyl]-1,2-dihydro-3H-pyrazol-3-one (3d).** Yield 27% (*method C*), off-white powder, mp 103-104 °C. <sup>1</sup>H NMR (CDCl<sub>3</sub>, 500 MHz): δ 3.35 (s, 3H, Me); 7.42-7.49, 7.54-7.57 (both m, 5H, Ph); 7.68, 8.28 (both d, *J* 8.6 Hz, 4H, C<sub>6</sub>H<sub>4</sub>). <sup>13</sup>C NMR (CDCl<sub>3</sub>, 125 MHz): δ 37.67 (q, *J* 2.0 Hz, Me); 114.22 (=C—Ar); 119.62 (q, *J* 273.0 Hz, CF<sub>3</sub>); 123.36, 125.14, 128.48, 129.67, 130.83, 132.81, 135.14, 147.65 (C<sub>6</sub>H<sub>4</sub> and Ph); 140.46 (q, *J* 37.2 Hz, C<sup>4</sup>—CF<sub>3</sub>); 161.58 (C=O). <sup>19</sup>F NMR (CDCl<sub>3</sub>, 470 MHz): δ 103.07 (s, CF<sub>3</sub>). IR: 1660 (C=O), 1627, 1595, 1493, 1455, 1441, 1420 (C=C), 1155-1095 (CF) cm<sup>-1</sup>. Anal. calcd for C<sub>17</sub>H<sub>12</sub>F<sub>3</sub>N<sub>3</sub>O<sub>3</sub>: C, 56.20; H, 3.33; N, 11.57. Found: C, 56.32; H, 3.27; N, 11.39.

**1-Methyl-2-phenyl-5-(trifluoromethyl)-4-[4-(trifluoromethyl)phenyl]-1,2-dihydro-3H-pyrazol-3-one (3e).** Yield 25% (*method C*), off-white powder, mp 99-100 °C. <sup>1</sup>H NMR (CDCl<sub>3</sub>, 500 MHz): δ 3.30 (s, 3H, Me); 7.39-7.42, 7.48-7.50, 7.52-7.55 (all m, 5H, Ph); 7.61, 7.68 (both d, *J* 8.1 Hz, 4H, C<sub>6</sub>H<sub>4</sub>). <sup>13</sup>C NMR (CDCl<sub>3</sub>, 125 MHz): δ 37.81 (q, *J* 1.9 Hz, Me); 115.62 (=C—Ar); 119.70 (q, *J* 273.0 Hz, CF<sub>3</sub>); 121.86 (q, *J* 270.0 Hz, C<sub>6</sub>H<sub>4</sub>—CF<sub>3</sub>); 124.85, 128.15, 129.56, 133.01 (Ph); 125.13 (q, *J* 3.7 Hz, C<sup>o</sup> Ar<sup>F</sup>); 130.22 (q, *J* 1.2 Hz, C<sup>m</sup> Ar<sup>F</sup>); 130.77 (q, *J* 32.6 Hz, C<sup>i</sup> Ar<sup>F</sup>); 131.98 (q, *J* 1.1 Hz, C<sup>p</sup> Ar<sup>F</sup>); 140.72 (q, *J* 37.2 Hz, C<sup>4</sup>—CF<sub>3</sub>); 161.95 (C=O). <sup>19</sup>F NMR (CDCl<sub>3</sub>, 470 MHz): δ 98.99, 103.01 (both s, 6F, 2CF<sub>3</sub>). IR: 1666 (C=O), 1620, 1593, 1496, 1457, 1442, 1421 (C=C), 1165-1068 (CF) cm<sup>-1</sup>. Anal. calcd for C<sub>18</sub>H<sub>12</sub>F<sub>6</sub>N<sub>2</sub>O: C, 55.97; H, 3.13; N, 7.25. Found: C, 55.69; H, 3.05; N, 7.36.

Colorless single crystals of compound **3e** were obtained by crystallization from a mixture of CHCl<sub>3</sub>:*n*-hexane:EtOAc – 4:4:1. Main crystallographic data for **3e**: C<sub>18</sub>H<sub>12</sub>F<sub>6</sub>N<sub>2</sub>O, *M* 386.30, space group P $\bar{1}$ , triclinic, *a* 8.6416(7), *b* 11.0188(9), *c* 18.0722(14) Å,  $\alpha$  93.734(6),  $\beta$  90.935(6),  $\gamma$  95.221(6)°, *V* 1709.6(2) Å<sup>3</sup>, *Z* 4, *D*<sub>calc</sub> 1.501 g·cm<sup>-3</sup>,  $\mu$  0.139 mm<sup>-1</sup>, 584 refinement parameters, 8397 reflections measured, 3326 unique reflections which were used in all calculations. The final *R* is 0.057. CCDC 2110385 contains the supplementary crystallographic data for this compound.

**1-Methyl-2-phenyl-5-(trifluoromethyl)-4-[3-(trifluoromethyl)phenyl]-1,2-dihydro-3H-pyrazol-3-one (3f).** Yield 23% (*method C*), white powder, mp 105-106 °C. <sup>1</sup>H NMR (CDCl<sub>3</sub>, 500 MHz): δ 3.30 (s, 3H, Me); 7.39-7.42, 7.49-7.54, 7.63-7.68, 7.77 (all m, 9H, C<sub>6</sub>H<sub>4</sub> and Ph). <sup>13</sup>C NMR (CDCl<sub>3</sub>, 125 MHz): δ 37.90 (q, *J* 1.9 Hz, Me); 115.76 (=C—Ar); 119.74 (q, *J* 273.0 Hz, CF<sub>3</sub>); 121.84 (q, *J* 255.8 Hz, C<sub>6</sub>H<sub>4</sub>—CF<sub>3</sub>); 124.80, 128.12, 129.57, 133.11 (Ph); 125.33 (q, *J* 3.7 Hz, C Ar<sup>F</sup>); 130.75 (q, *J* 32.6 Hz, C<sup>3'</sup> Ar<sup>F</sup>); 126.81, 128.69, 129.07, 133.17 (4C Ar<sup>F</sup>); 140.85 (q, *J* 37.1 Hz, C<sup>4</sup>—CF<sub>3</sub>); 162.05 (C=O). <sup>19</sup>F NMR (CDCl<sub>3</sub>, 470 MHz): δ 99.00, 102.91 (both s, 6F,

2CF<sub>3</sub>). IR: 1675 (C=O), 1624, 1596, 1496, 1459, 1411 (C=C), 1154-1074 (CF) cm<sup>-1</sup>. Anal. calcd for C<sub>18</sub>H<sub>12</sub>F<sub>6</sub>N<sub>2</sub>O: C, 55.97; H, 3.13; N, 7.25. Found: C, 55.72; H, 3.15; N, 7.29.

**1-Methyl-4-(4-(methylthio)phenyl)-5-(trifluoromethyl)-2-phenyl-1,2-dihydro-3H-pyrazol-3-one (3g).** Yield 59% (*method A*), 79% (*method B*), beige powder, mp 113-115 °C. <sup>1</sup>H NMR (DMSO-*d*<sub>6</sub>, 500 MHz): δ 2.51 (s, 3H, SMe); 3.23 (s, 3H, Me); 7.34-7.35, 7.50-7.51, 7.57-7.59 (all m, 10H, 2 Ph). <sup>13</sup>C NMR (DMSO-*d*<sub>6</sub>, 125 MHz): δ 14.31 (SMe); 39.16 (Me); 115.28 (unsolv. q, =C—Ar); 119.76 (q, *J* 272.7 Hz, CF<sub>3</sub>); 124.57, 125.17, 125.21, 127.97, 129.41, 130.06, 132.95, 138.91 (2 Ph); 138.92 (q, 36.2 Hz, C—CF<sub>3</sub>); 161.29 (C=O). <sup>19</sup>F NMR (DMSO-*d*<sub>6</sub>, 470 MHz): δ 104.68 (s, CF<sub>3</sub>). IR: 1680 (C=O), 1412, 1429, 1456, 1494 (C=C), 1094-1157 (CF) cm<sup>-1</sup>. Anal. calcd for C<sub>18</sub>H<sub>15</sub>F<sub>3</sub>N<sub>2</sub>OS. C, 59.33; H, 4.15; N, 7.69. Found: C, 56.47; H, 3.66; N, 6.27.

**2,4-Diphenyl-1-methyl-5-(pentafluoroethyl)-1,2-dihydro-3H-pyrazol-3-one (3h).** Yield 68% (*method A*), 86% (*method B*), beige powder, mp 155 °C. <sup>1</sup>H NMR (CDCl<sub>3</sub>, 500 MHz): δ 3.23 (s, 3H, Me); 7.31-7.45, 7.48-7.57 (all m, 10H, 2 Ph). <sup>13</sup>C NMR (CDCl<sub>3</sub>, 125 MHz): δ 38.70 (Me); 110.60 (tq, *J* 257.4, 40.7 Hz, CF<sub>2</sub>); 118.45 (qt, *J* 287.3, 37.0 Hz, CF<sub>2</sub>); 121.49 (=C—Ph); 124.66, 127.77, 127.97, 128.33, 128.45, 129.42, 129.65, 130.07 (2 Ph); 133.50 (t, *J* 27.4 Hz, C—CF<sub>2</sub>); 162.63 (C=O). <sup>19</sup>F NMR (CDCl<sub>3</sub>, 470 MHz): δ 52.38 (br.s, 2F, CF<sub>2</sub>), 78.37 (t, *J* 3.2 Hz, 3F, CF<sub>3</sub>). IR: 1670 (C=O), 1122, 1139, 1184, 1216, 1223 (C=C), 1018-1079 (CF) cm<sup>-1</sup>. Anal. calcd for C<sub>18</sub>H<sub>13</sub>F<sub>5</sub>N<sub>2</sub>O: C, 58.70; H, 3.56; N, 7.61. Found: C, 57.88; H, 3.34; N, 7.44.

**1-Methyl-4-(4-(methylthio)phenyl)-5-(pentafluoroethyl)-2-phenyl-1,2-dihydro-3H-pyrazol-3-one (3i).** Yield 54% (*method A*), 73% (*method B*), beige powder, mp 99-100 °C. <sup>1</sup>H NMR (CDCl<sub>3</sub>, 500 MHz): δ 2.50 (s, 3H, SMe); 3.22 (s, 3H, Me); 7.26-7.31, 7.38-7.40, 7.48-7.54 (all m, 10H, 2 Ph). <sup>13</sup>C NMR (CDCl<sub>3</sub>, 125 MHz): δ 15.47 (SMe); 38.69 (Me); 110.60 (tq, *J* 257.3, 40.6 Hz, CF<sub>2</sub>); 118.45 (qt, *J* 287.3, 37.1 Hz, CF<sub>2</sub>); 120.85 (=C—Ar); 124.71, 124.83, 125.82, 127.85, 129.44, 130.42, 133.41, 139.24 (2 Ph); 138.97 (t, *J* 27.5 Hz, C—CF<sub>2</sub>); 162.59 (C=O). <sup>19</sup>F NMR (CDCl<sub>3</sub>, 470 MHz): δ 52.42 (br.s, 2F, CF<sub>2</sub>), 78.40 (t, *J* 3.3 Hz, 3F, CF<sub>3</sub>). IR: 1671 (C=O), 1460, 1459, 1587 (C=C), 1147-1219 (CF) cm<sup>-1</sup>. Anal. calcd for C<sub>19</sub>H<sub>15</sub>F<sub>5</sub>N<sub>2</sub>OS: C, 55.07; H, 3.65; N, 6.76. Found: C, 55.27; H, 3.60; N, 6.47.

**2,4-Diphenyl-5-(heptafluoropropyl)-1-methyl-1,2-dihydro-3H-pyrazol-3-one (3j).** Yield 65% (*method A*), beige powder, mp 160 °C. <sup>1</sup>H NMR (CDCl<sub>3</sub>, 500 MHz): δ 3.23 (s, 3H, Me); 7.37-7.38, 7.48-7.54 (all m, 10H, 2 Ph). <sup>13</sup>C NMR (CDCl<sub>3</sub>, 125 MHz): δ 38.84 (Me); 108.68 (tq, *J* 266.7, 38.0 Hz, β-CF<sub>2</sub>); 112.62 (tt, *J* 258.0, 32.9 Hz, α-CF<sub>2</sub>); 117.56 (qt, *J* 288.0, 33.7 Hz, CF<sub>3</sub>); 121.84 (=C—Ph); 124.68, 127.81, 127.96, 128.34, 128.47, 129.45, 130.09 (2 Ph); 139.39 (t, *J* 27.7 Hz, C—CF<sub>2</sub>); 162.67 (C=O). <sup>19</sup>F NMR (CDCl<sub>3</sub>, 470 MHz): δ 36.34-36.41 (m, 2F, CF<sub>2</sub>); 55.19 (q, *J* 9.7 Hz, 2F, CF<sub>2</sub>); 81.66 (t, *J* 9.7 Hz, 3F, CF<sub>3</sub>). IR: 1671 (C=O), 1338, 1498, 1593

(C=C), 1116-1235 (CF)  $\text{cm}^{-1}$ . Anal. calcd for  $\text{C}_{19}\text{H}_{13}\text{F}_7\text{N}_2\text{O}$ : C, 54.55; H, 3.13; N, 6.70. Found: C, 52.76; H, 3.16; N, 6.48.

**5-(Heptafluoropropyl)-1-methyl-4-(4-(methylthio)phenyl)-2-phenyl-1,2-dihydro-3H-pyrazol-3-one (3k).** Yield 52% (*method A*), beige powder, mp 155-156 °C.  $^1\text{H}$  NMR ( $\text{CDCl}_3$ , 500 MHz):  $\delta$  2.50 (s, 3H, SMe); 3.22 (s, 3H, Me); 7.26-7.28, 7.36-7.40, 7.47-7.52 (all m, 10H, 2 Ph).  $^{13}\text{C}$  NMR ( $\text{CDCl}_3$ , 125 MHz):  $\delta$  15.49 (SMe); 38.86-38.88 (m, Me); 107.73 (tq,  $J$  266.8, 37.9 Hz,  $\beta\text{-CF}_2$ ); 112.66 (tt,  $J$  258.0, 32.9 Hz,  $\alpha\text{-CF}_2$ ); 117.59 (qt,  $J$  288.2, 33.8 Hz,  $\text{CF}_3$ ); 121.25 ( $=\underline{\text{C}}$ —Ph); 124.77, 124.89, 125.82, 127.91, 129.50, 130.48, 133.48, 139.29 (2 Ph); 139.01 (t,  $J$  28.0 Hz,  $\underline{\text{C}}$ — $\text{CF}_2$ ); 162.67 (C=O).  $^{19}\text{F}$  NMR ( $\text{CDCl}_3$ , 470 MHz):  $\delta$  36.36-36.46 (m, 2F,  $\text{CF}_2$ ), 55.21-55.23 (m, 2F,  $\text{CF}_2$ ), 81.70 (t,  $J$  9.8 Hz, 3F,  $\text{CF}_3$ ). IR: 1674 (C=O), 1405, 1459, 1587 (C=C), 1094-1240 (CF)  $\text{cm}^{-1}$ . Anal. calcd for  $\text{C}_{20}\text{H}_{15}\text{F}_7\text{N}_2\text{OS}$ : C, 51.73; H, 3.26; N, 6.03. Found: C, 51.92; H, 3.33; N, 6.01.

**2,4-Diphenyl-1-methyl-5-(nonafluorobutyl)-1,2-dihydro-3H-pyrazol-3-one (3l).** Yield 67% (*method A*), beige powder, mp 97-98 °C.  $^1\text{H}$  NMR ( $\text{CDCl}_3$ , 500 MHz):  $\delta$  3.23 (s, 3H, Me); 7.36-7.42, 7.48-7.54 (all m, 10H, 2 Ph).  $^{13}\text{C}$  NMR ( $\text{CDCl}_3$ , 125 MHz):  $\delta$  38.84-38.88 (m, Me); 106.39-115.55 (m, 3 $\text{CF}_2$ ); 117.25 (qt,  $J$  288.3, 33.2 Hz,  $\text{CF}_3$ ); 121.92 ( $=\underline{\text{C}}$ —Ph); 124.69, 127.81, 127.96, 128.34, 128.36, 129.45, 130.09 (2 Ph); 139.25 (t,  $J$  27.8 Hz,  $\underline{\text{C}}$ — $\text{CF}_2$ ); 162.67 (C=O).  $^{19}\text{F}$  NMR ( $\text{CDCl}_3$ , 470 MHz):  $\delta$  35.84-35.93, 39.90-39.97, 55.86-55.93 (all m, 3 $\text{CF}_2$ ), 80.92 (t,  $J$  9.8 Hz, 3F,  $\text{CF}_3$ ). IR: 1669 (C=O), 1458, 1498, 1593, 1626 (C=C), 1130-1239 (CF)  $\text{cm}^{-1}$ . Anal. calcd for  $\text{C}_{20}\text{H}_{13}\text{F}_9\text{N}_2\text{O}$ : C, 51.29; H, 2.80; N, 5.98. Found: C, 51.29; H, 2.88; N, 5.91.

### Synthesis of 1-methyl-2-phenyl-4-(phenylethynyl)-5-(polyfluoroalkyl)-1,2-dihydro-3H-pyrazolon-3-ones **6a,b**.

A screw-neck vial was flushed with argon and charged with 4-iodo-5-(polyfluoroalkyl)-antipyrine **5a,b** (1 mmol), phenylacetylene (1.5 mmol, 153 mg), XPhos (0.04 mmol, 19 mg),  $\text{Pd}_2(\text{dba})_3$  (0.02 mmol, 18 mg), CuI (0.1 mmol, 19 mg), DIPEA (2 mmol, 258 mg), and MeCN (4 ml). The vial was repeatedly flushed with argon, closed tightly and a mixture was stirring at the room temperature for 72 h. After cooling, the solvent was evaporated in vacuo and the crosslinking product - 1,4-diphenyl-1,3-butadiyne was removed by flash-chromatography on silica gel (eluent –  $\text{CHCl}_3$ ). Then, the product **6a** was purified by column chromatography on silica gel using a mixture of *n*-hexane and EtOAc (4:1) or the compound **6b** was re-crystallized from a mixture of *n*-hexane and EtOAc (4:1).

**1-Methyl-2-phenyl-4-(phenylethynyl)-5-(trifluoromethyl)-1,2-dihydro-3H-pyrazolon-3-one (6a).** Yield 60 %, brown crystals, mp 124-125 °C.  $^1\text{H}$  NMR ( $\text{CDCl}_3$ , 500 MHz):  $\delta$  3.27 (s, 3H, Me); 7.33-7.34, 7.41-7.43, 7.51-7.55 (all m, 10H, 2 Ph).  $^{13}\text{C}$  NMR ( $\text{CDCl}_3$ , 125

MHz):  $\delta$  37.27-37.28 (m, Me); 76.45, 97.75 ( $-\text{C}\equiv\text{C}-$ ); 99.95 (unsolv. q,  $\text{C}^4$ ); 119.22 (q,  $J$  272.9 Hz,  $\text{CF}_3$ ); 122.59, 125.40, 128.25, 128.54, 128.73, 129.63, 131.78, 131.74 (2 Ph); 142.83 (q,  $J$  37.2 Hz,  $\underline{\text{C}}-\text{CF}_3$ ); 161.85 ( $\text{C}=\text{O}$ ).  $^{19}\text{F}$  NMR ( $\text{CDCl}_3$ , 470 MHz):  $\delta$  100.83 (s,  $\text{CF}_3$ ). IR: 1678 ( $\text{C}=\text{O}$ ); 1416, 1457, 1585 ( $\text{C}=\text{C}$ ); 1118-1174 (CF)  $\text{cm}^{-1}$ . Anal. calcd for  $\text{C}_{19}\text{H}_{13}\text{F}_3\text{N}_2\text{O}$ : C, 66.67; H, 3.83; N, 6.76. Found: C, 66.66; H, 3.86; N, 7.91.

**1-Methyl-5-(pentafluoroethyl)-2-phenyl-4-(phenylethynyl)-1,2-dihydro-3H-pyrazolon-3-one (6b).** Yield 65 %, brown crystals, mp 129-130 °C.  $^1\text{H}$  NMR ( $\text{CDCl}_3$ , 500 MHz):  $\delta$  3.26 (s, 3H, Me); 7.33, 7.40-7.44, 7.53 (all m, 10H, 2 Ph).  $^{13}\text{C}$  NMR ( $\text{CDCl}_3$ , 125 MHz):  $\delta$  37.85-37.93 (m, Me); 76.62, 97.92 ( $-\text{C}\equiv\text{C}-$ ); 102.72 (unsolv. t,  $\text{C}^4$ ); 110.15 (tq,  $J$  258.2, 41.2 Hz,  $\text{CF}_2$ ); 118.16 (qt,  $J$  287.5, 37.1 Hz,  $\text{CF}_3$ ); 122.66, 125.65, 128.24, 128.67, 128.73, 129.64, 131.76, 132.77 (2 Ph); 141.45 (t,  $J$  27.0 Hz,  $\underline{\text{C}}-\text{CF}_2$ ); 161.75 ( $\text{C}=\text{O}$ ).  $^{19}\text{F}$  NMR ( $\text{CDCl}_3$ , 470 MHz):  $\delta$  49.24 (br.s, 2F,  $\text{CF}_2$ ); 100.83 (br.s, 3F,  $\text{CF}_3$ ). IR: 1677 ( $\text{C}=\text{O}$ ); 1574, 1589, 1488 ( $\text{C}=\text{C}$ ); 1207-1157 (CF)  $\text{cm}^{-1}$ . Anal. calcd for  $\text{C}_{20}\text{H}_{13}\text{F}_5\text{N}_2\text{O}$ . C, 61.23; H, 3.34; N, 7.14. Найдено (%): C, 61.35; H, 3.23; N, 7.10.

### Biological testing

Viruses and cells. We used the transplantable Vero cell cultures (green monkey kidney cells) obtained from the collection of cell cultures of the Vector Institute (Koltsovo, Novosibirsk region) and MDCK (ATCC CCL-34) from the collection of cell lines of the Saint Petersburg Pasteur Institute of Epidemiology and Microbiology. Vero cells were cultured in 96-well culture plates in DMEM medium with additive of 2% fetal bovine serum («HyClone», USA), 40 U/ml of gentamicin sulfate, and 2.5 U/ml of amphotericin B. MDCK cells were cultured in MEM medium with additive of 10% fetal bovine serum («HyClone», USA), 40 U/ml gentamicin sulfate and 2.5 U/ml amphotericin B. Cell suspension with a concentration of 105 cells/ml was placed in the wells of the plates in volume of 100  $\mu\text{l}$  and cultured until a complete monolayer formation for 24 h at 37 °C in the presence of 5%  $\text{CO}_2$ .

The same medium without serum was used as a support medium for culturing cells with viruses.

We used influenza virus A/Puerto Rico/8/34 (H1N1) from the collection of the Saint Petersburg Pasteur Institute of Epidemiology and Microbiology, and vaccine virus (VV, strain Copenhagen), herpes simplex virus type 1 (HSV-1, strain VR-3) and bovine diarrhea virus (BDV) (strain VC-1) obtained from the collection of the Vector Institute (Koltsovo, Novosibirsk region). The infectious titers of viruses were determined by titration in 96-well plates with monolayers of the corresponding line cells [4]. The results were evaluated visually according to the presence of the virus cytopathic action, the virus titer was calculated by the Spearman-Kerker method and represented in decimal logarithms of 50% tissue cytopathic doses in ml ( $\lg \text{TCD}_{50}/\text{ml}$ ) [5].

## **Evaluation of cytotoxic properties of compounds**

The investigation of toxicity of compounds was carried out based on evaluation of the cells viability using the reduction reaction of the tetrazolium dye MTT (3-(4,5-dimethyl-2-thiazolyl)-2,5-diphenyl-2*H*-tetrazolium bromide) by cells in culture. Its intensity shows the degree of cell viability as a result of dye reduction by mitochondrial and partially cytoplasmic dehydrogenases.

The test compounds in the concentration range of 4-1000 µg/ml dissolved in the medium for cell cultivation were added to the plate wells in a volume of 200 µl and incubated for 72 h at 36 °C in an atmosphere of 5% CO<sub>2</sub>. At the end of the incubation period, the cells were washed with MEM medium, and 100 µl of a solution (0.5 mg/ml) of MTT in the cell medium was added to the plate wells. The cells were incubated at 36 °C in an atmosphere of 5% CO<sub>2</sub> for 2 h and washed for 5 min with saline. The precipitate was dissolved in 100 µl of DMSO per well, and the optical density was measured using a Multiscan FC plate analyzer (Thermo Scientific) at a wavelength of 540 nm. Based on the obtained data, the 50% cytotoxic concentration (CC<sub>50</sub>) was calculated, i.e. the concentration of the compound, which reduces the optical density in the wells by half compared to control cells without drugs.

## **Evaluation of antiviral activity of compounds**

### *Determination of activity in relation to influenza virus A/Puerto Rico/8/34 (H1N1)*

The compounds in appropriate concentrations were added to MDCK cells (0.1 ml per well). After 1 h of incubation, cells were infected with influenza virus A/Puerto Rico/8/34 (H1N1) (moi 0.01) and incubated for 72 h at 36 °C and 5% CO<sub>2</sub>. After that, cell viability was assessed by MTT test as described in [6]. The cytoprotective activity of compounds was considered as their ability to increase the values of OD comparing to control wells (with virus only, no drugs). Based on the results obtained, the values of IC<sub>50</sub>, i.e. concentration of compounds that result in 50% cells protection were calculated using GraphPad Prism 6.01 software. Values of IC<sub>50</sub> obtained in µg/ml were then calculated into micromoles (µM). For each compound the value of selectivity index (SI) was calculated as ratio of CC<sub>50</sub> to IC<sub>50</sub>.

### *Determination of activity in relation to SVV, HSV-1, and VDC*

The studied compounds were preliminarily dissolved in DMSO at a concentration of 20 mg/ml and stored in a freezer at -70 °C.

To test the antiviral activity of the compounds against VV, HSV-1, and BDV, a series of 5-fold dilutions of the samples were prepared (starting with a concentration of 400 µg/ml).

VV, HSV-1, and BDV were added to the plate wells at doses corresponding to a multiplicity of infection (moi) of 0.01. Viruses were cultured in cells in the presence of test compounds for 3 days. After this period, the cells viability in culture was assessed as described above. Based on the obtained data, the value of 50% inhibitory concentration (IC<sub>50</sub>) was calculated,

i.e., the concentration of the compound leading to a 50% decrease in the cytodestructive effect of the virus.

Based on the  $CC_{50}$  and  $IC_{50}$  values, the selectivity index (SI) or the therapeutic index was calculated showing how many times the cytotoxic concentration is greater than the virus inhibiting concentration of the drug:  $SI = CC_{50}/IC_{50}$ .

## References

- [1] O. V. Dolomanov, L.J. Bourhis, R.J. Gildea, J.A.K. Howard, H. Puschmann, OLEX2 : a complete structure solution, refinement and analysis program, *J. Appl. Crystallogr.* 42 (2009) 339–341. doi:10.1107/S0021889808042726.
- [2] G.M. Sheldrick, Crystal structure refinement with SHELXL, *Acta Crystallogr. Sect. C Struct. Chem.* 71 (2015) 3–8. doi:10.1107/S2053229614024218.
- [3] N. Agafonova, E. Shchegolkov, Y. Burgart, V. Saloutin, A. Trefilova, G. Triandafilova, S. Solodnikov, V. Maslova, S. Borisevich, O. Krasnykh, S. Khursan, Synthesis and biological evaluation of polyfluoroalkylated antipyridines and their isomeric O-methylpyrazoles, *Med. Chem.* 14 (2018). doi:10.2174/1573406414666181106145435.
- [4] *Virology Methods Manual*, Elsevier, 1996. doi:10.1016/B978-0-12-465330-6.X5000-3.
- [5] L. Sachs, *Statistische Auswertungsmethoden*, Springer Berlin Heidelberg, Berlin, Heidelberg, 1972. doi:10.1007/978-3-662-10037-0.
- [6] N.A. Elkina, Y. V. Burgart, E. V. Shchegolkov, O.P. Krasnykh, V. V. Maslova, G.A. Triandafilova, S.S. Solodnikov, A.A. Muryleva, M.A. Misiurina, A. V. Slita, V. V. ZarubaeV, V.I. Saloutin, Competitive routes to cyclizations of polyfluoroalkyl-containing 2-tolylhydrazinylidene-1,3-diketones with 3-aminopyrazoles into bioactive pyrazoloazines, *J. Fluorine Chem.* 240 (2020) 109648. doi:10.1016/j.jfluchem.2020.109648.

# Copies of $^1\text{H}$ , $^{13}\text{C}$ , and $^{19}\text{F}$ NMR spectra of compounds

$^1\text{H}$  NMR spectrum of compound **4a** in  $\text{DMSO-}d_6$

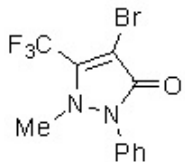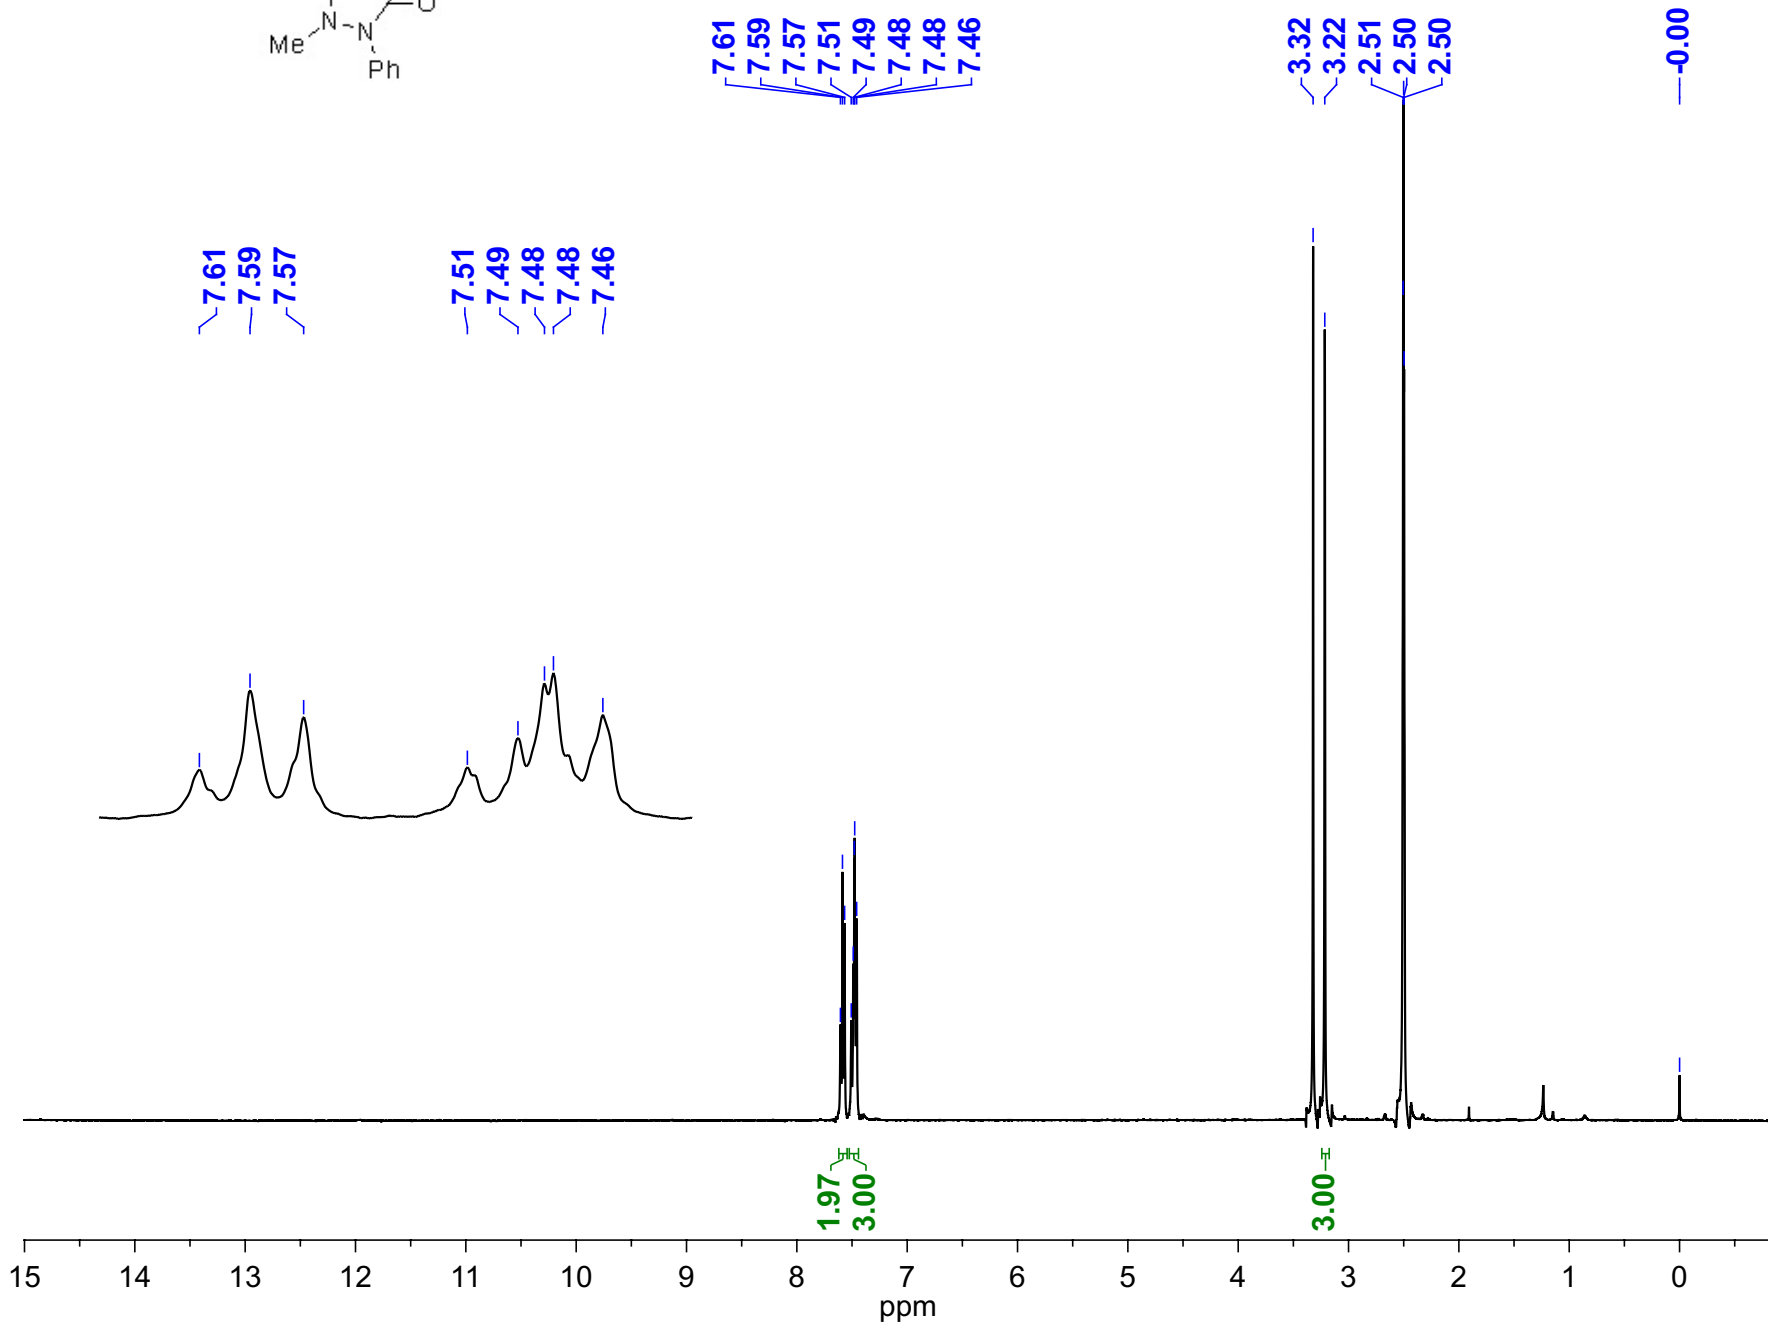

## Current Data Parameters

NAME NNA304  
 EXPNO 1  
 PROCNO 1  
 USER uralhmr

## F2 - Acquisition Parameters

Date\_ 20181212  
 Time 13.12  
 INSTRUM DRX400  
 PROBHD 5 mm SEF 19F-1  
 PULPROG zg30  
 TD 32768  
 SOLVENT DMSO  
 NS 16  
 DS 2  
 SWH 6410.256 Hz  
 FIDRES 0.195625 Hz  
 AQ 2.5559540 sec  
 RG 512  
 DW 78.000 usec  
 DE 20.00 usec  
 TE 297.2 K  
 D1 1.00000000 sec  
 MCREST 0.00000000 sec  
 MCWRK 0.01500000 sec  
 ===== CHANNEL f1 =====  
 NUC1 1H  
 P1 20.00 usec  
 PL1 0.00 dB  
 SFO1 400.1328009 MHz

## F2 - Processing parameters

SI 32768  
 HZpPT 0.195625 Hz  
 SF 400.1300024 MHz  
 SR 2.39 Hz  
 WDW EM  
 LB 0.00 Hz  
 GB 0  
 -1SSB 0  
 PC 4.00

<sup>13</sup>C NMR spectrum of compound **4a** in DMSO-*d*<sub>6</sub>

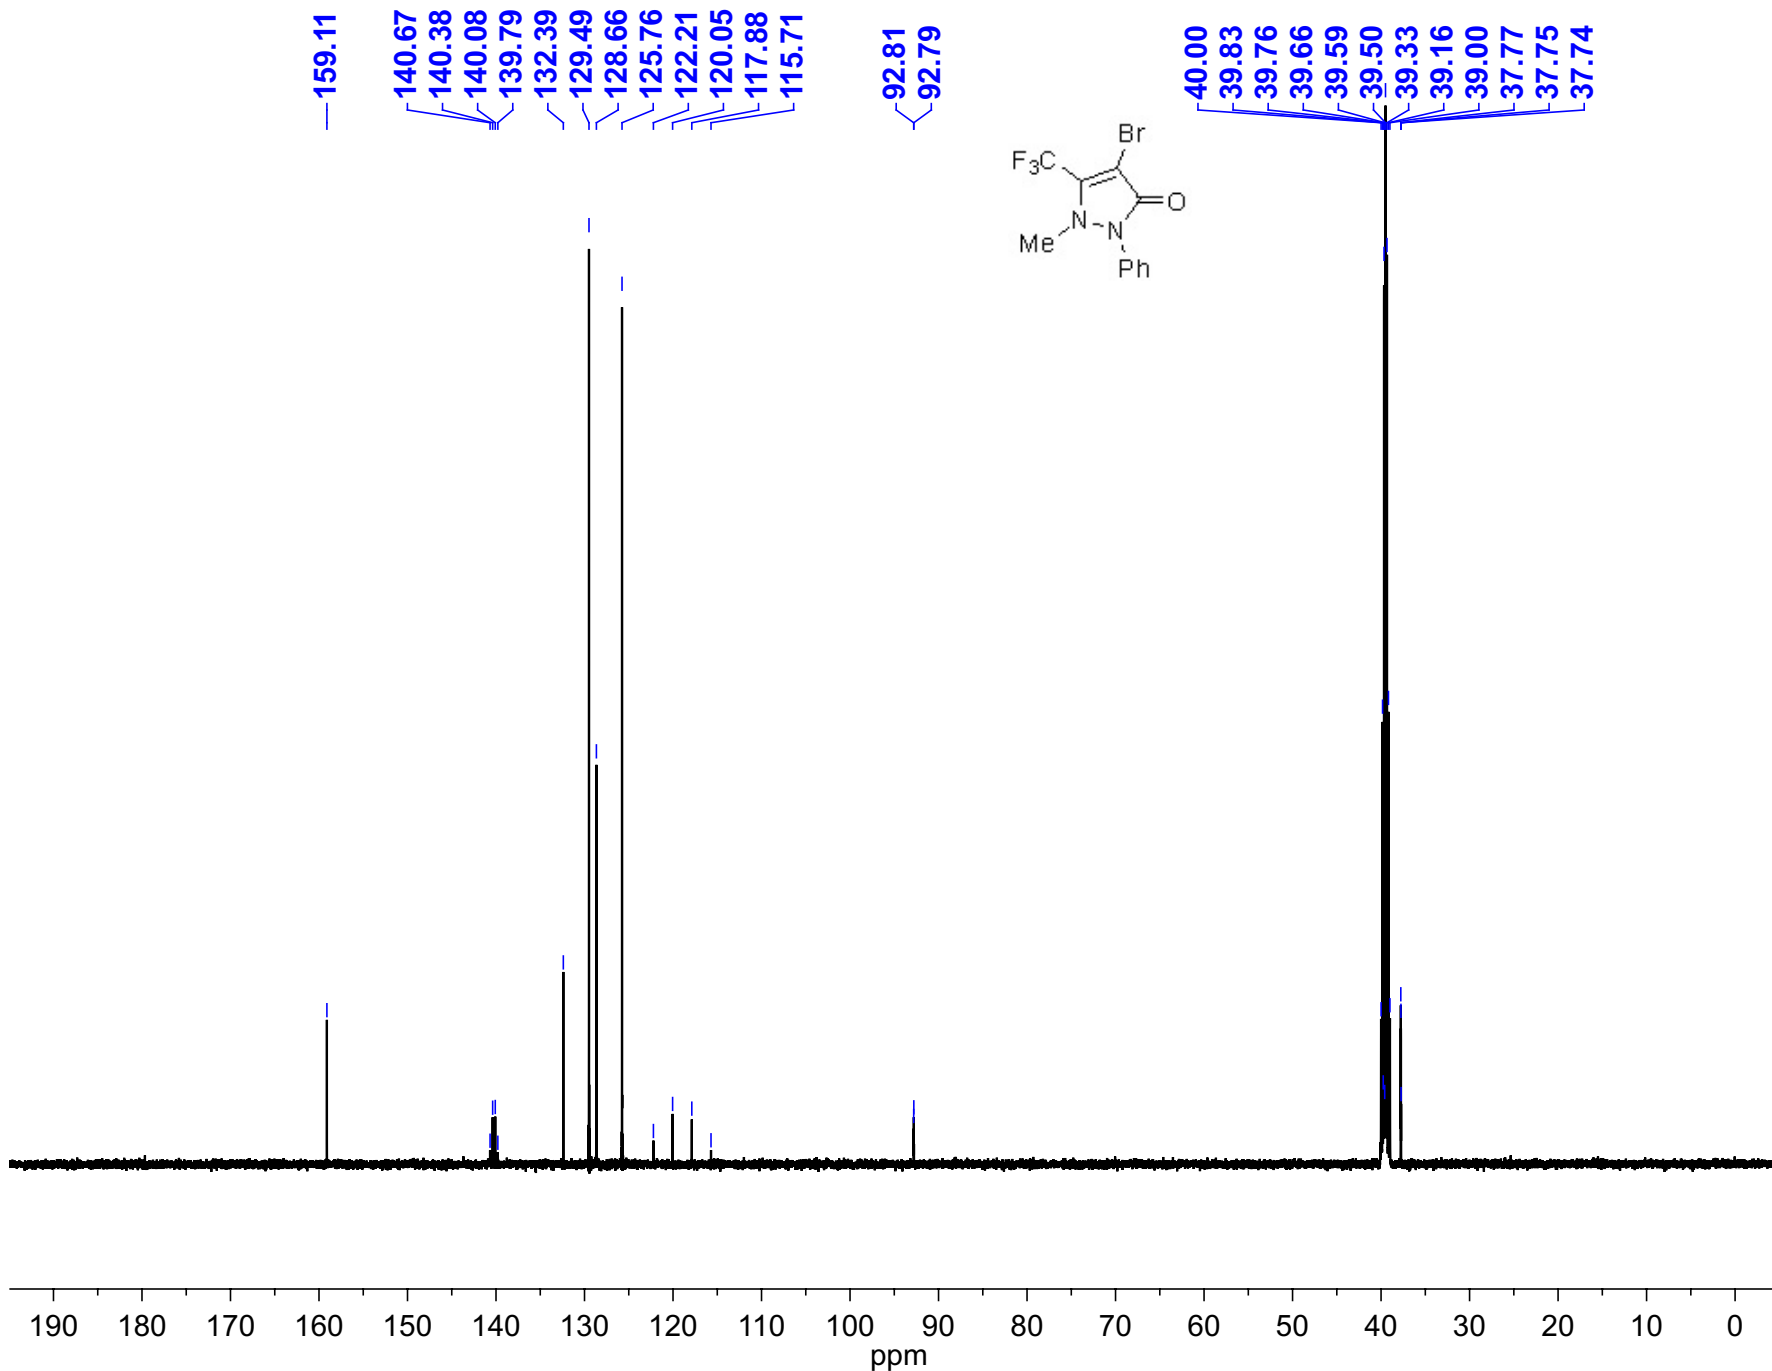

|                       |                 |
|-----------------------|-----------------|
| NAME                  | NNA304          |
| EXPNO                 | 13              |
| PROCNO                | 1               |
| USER                  | uralnmr         |
| Date_                 | 20190123        |
| Time                  | 13.27           |
| INSTRUM               | AV500           |
| PROBHD                | 5 mm PABBO BB-  |
| PULPROG               | zgpg30          |
| SOLVENT               | DMSO            |
| TD                    | 32768           |
| SW                    | 200.7838 ppm    |
| O1P                   | 95.000 ppm      |
| FIDRES                | 0.770646 Hz     |
| NS                    | 1024            |
| DS                    | 8               |
| AQ                    | 0.6488564 sec   |
| RG                    | 203             |
| TE                    | 296.9 K         |
| DE                    | 6.50 usec       |
| D1                    | 0.80000001 sec  |
| D11                   | 0.03000000 sec  |
| TD0                   | 1               |
| ==== CHANNEL f1 ===== |                 |
| NUC1                  | 13C             |
| P1                    | 10.00 usec      |
| PL1                   | 0.00 dB         |
| PL1W                  | 115.29558563 W  |
| SFO1                  | 125.7697360 MHz |
| ==== CHANNEL f2 ===== |                 |
| CPDPRG2               | waltz16         |
| NUC2                  | 1H              |
| PCPD2                 | 75.00 usec      |
| PL2                   | 120.00 dB       |
| PL12                  | 16.30 dB        |
| PL13                  | 19.30 dB        |
| PL2W                  | 0.00000000 W    |
| PL12W                 | 0.47519693 W    |
| PL13W                 | 0.23816262 W    |
| SFO2                  | 500.1320005 MHz |
| SI                    | 32768           |
| HZpPT                 | 0.770646 Hz     |
| SR                    | 63.68 Hz        |
| WDW                   | EM              |
| LB                    | 0.00 Hz         |
| GB                    | 0               |
| SSB                   | 0               |



<sup>19</sup>F NMR spectrum of compound **4a** in DMSO-*d*<sub>6</sub>

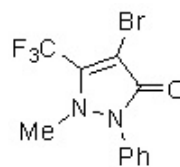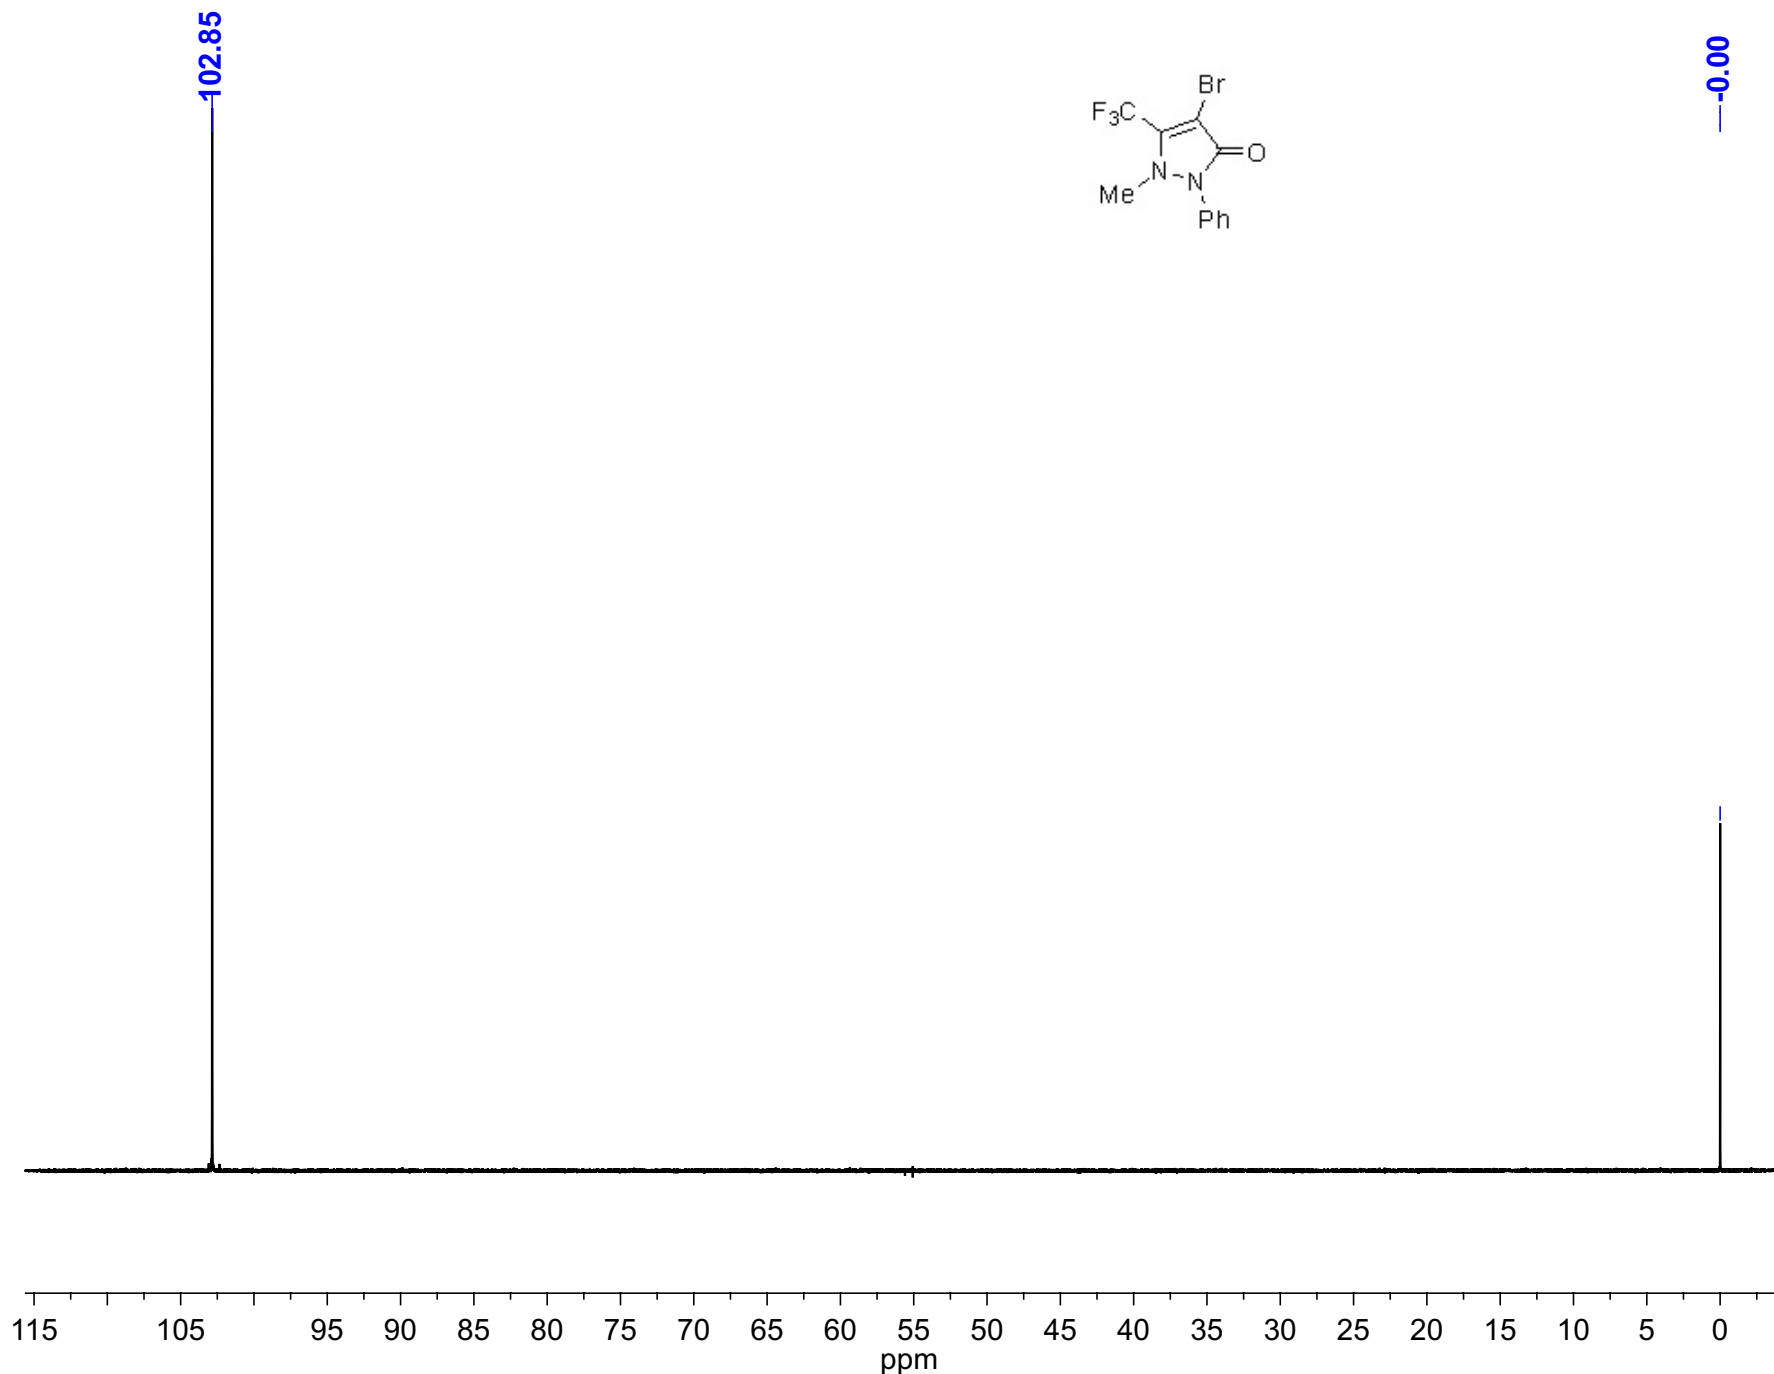

Current Data Parameters

NAME NNA304  
EXPNO 19  
PROCNO 1  
USER urahmr

F2 - Acquisition Parameters

Date\_ 20181212  
Time 13.15  
INSTRUM DRX400  
PROBHD 5 mm SEF 19F-1  
PULPROG zg30  
TD 131072  
SOLVENT DMSO  
NS 8  
DS 2  
SWH 45351.473 Hz  
FIDRES 0.346004 Hz  
AQ 1.4451188 sec  
RG 4597.6  
DW 11.025 usec  
DE 6.50 usec  
TE 297.2 K  
D1 1.00000000 sec  
MCREST 0.00000000 sec  
MCWRK 0.01500000 sec  
==== CHANNEL f1 =====  
NUC1 19F  
P1 10.10 usec  
PL1 0.00 dB  
SFO1 376.4579891 MHz

F2 - Processing parameters

SI 131072  
HZpPT 0.346004 Hz  
SF 376.4371603 MHz  
SR -124.73 Hz  
WDW EM  
LB 0.00 Hz  
GB 0  
SSB 0  
PC 4.00

<sup>1</sup>H NMR spectrum of compound **4b** in CDCl<sub>3</sub>

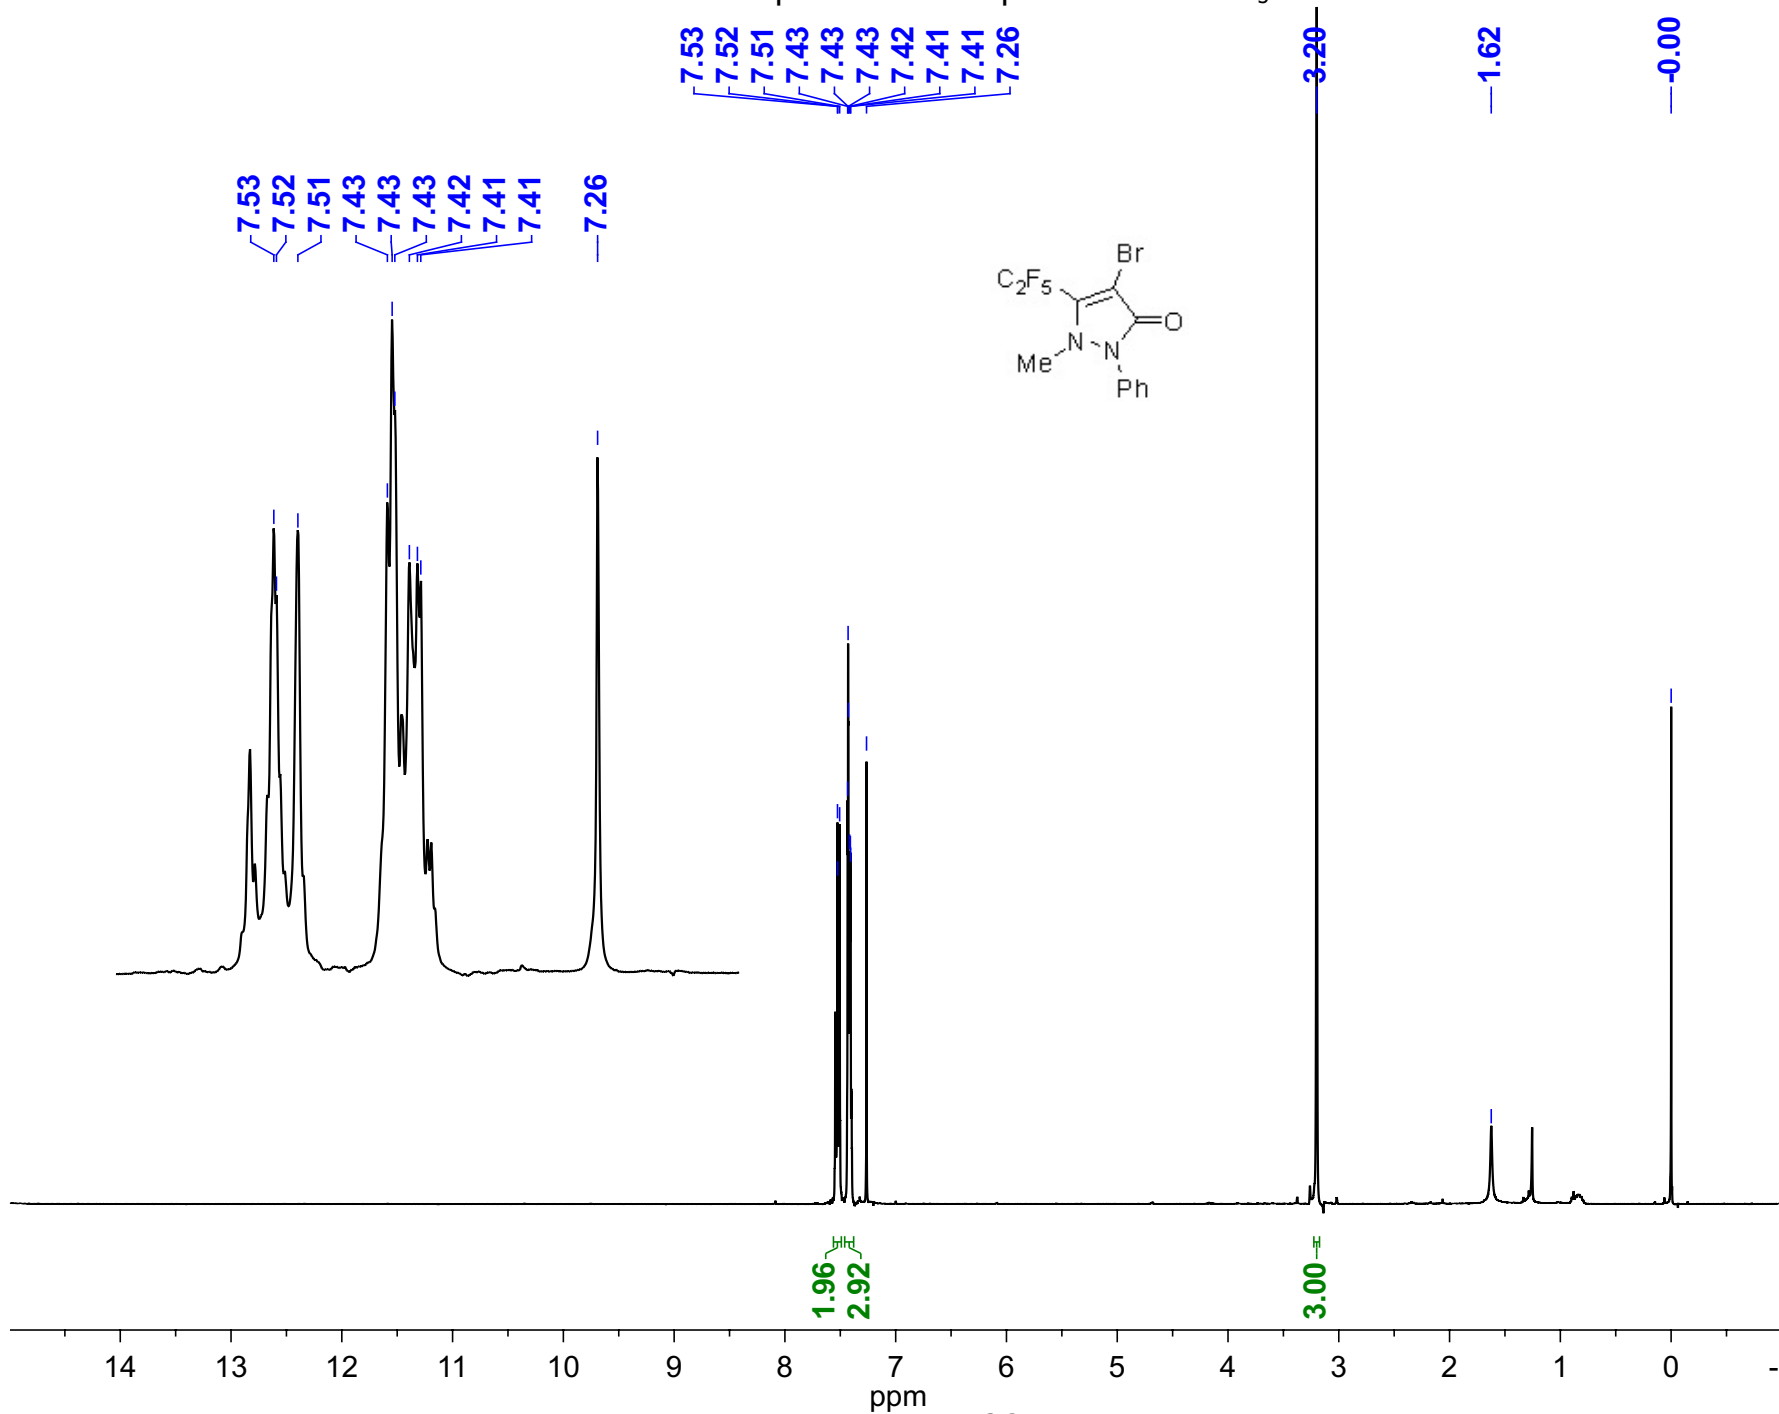

| Current Data Parameters     |                 |
|-----------------------------|-----------------|
| NAME                        | ESh705a         |
| EXPNO                       | 1               |
| PROCNO                      | 1               |
| USER                        | uralnvr         |
| F2 - Acquisition Parameters |                 |
| Date_                       | 20191219        |
| Time                        | 13.31           |
| INSTRUM                     | DRX400          |
| PROBHD                      | 5 mm SEF 19F-1  |
| PULPROG                     | zg30            |
| TD                          | 32768           |
| SOLVENT                     | CDCl3           |
| NS                          | 16              |
| DS                          | 2               |
| SWH                         | 6410.256 Hz     |
| FIDRES                      | 0.195625 Hz     |
| AQ                          | 2.5559540 sec   |
| RG                          | 512             |
| DW                          | 78.000 usec     |
| DE                          | 6.50 usec       |
| TE                          | 298.2 K         |
| D1                          | 1.0000000 sec   |
| MCREST                      | 0.0000000 sec   |
| MCWRK                       | 0.01500000 sec  |
| ===== CHANNEL f1 =====      |                 |
| NUC1                        | 1H              |
| P1                          | 20.00 usec      |
| PL1                         | 0.00 dB         |
| SFO1                        | 400.1328009 MHz |
| F2 - Processing parameters  |                 |
| SI                          | 32768           |
| HZpPT                       | 0.195625 Hz     |
| SF                          | 400.1300087 MHz |
| SR                          | 8.72 Hz         |
| WDW                         | EM              |
| LB                          | 0.00 Hz         |
| GB                          | 0               |
| SSB                         | 0               |
| PC                          | 4.00            |

<sup>13</sup>C NMR spectrum of compound **4b** in CDCl<sub>3</sub>

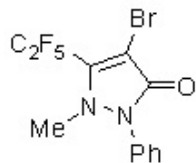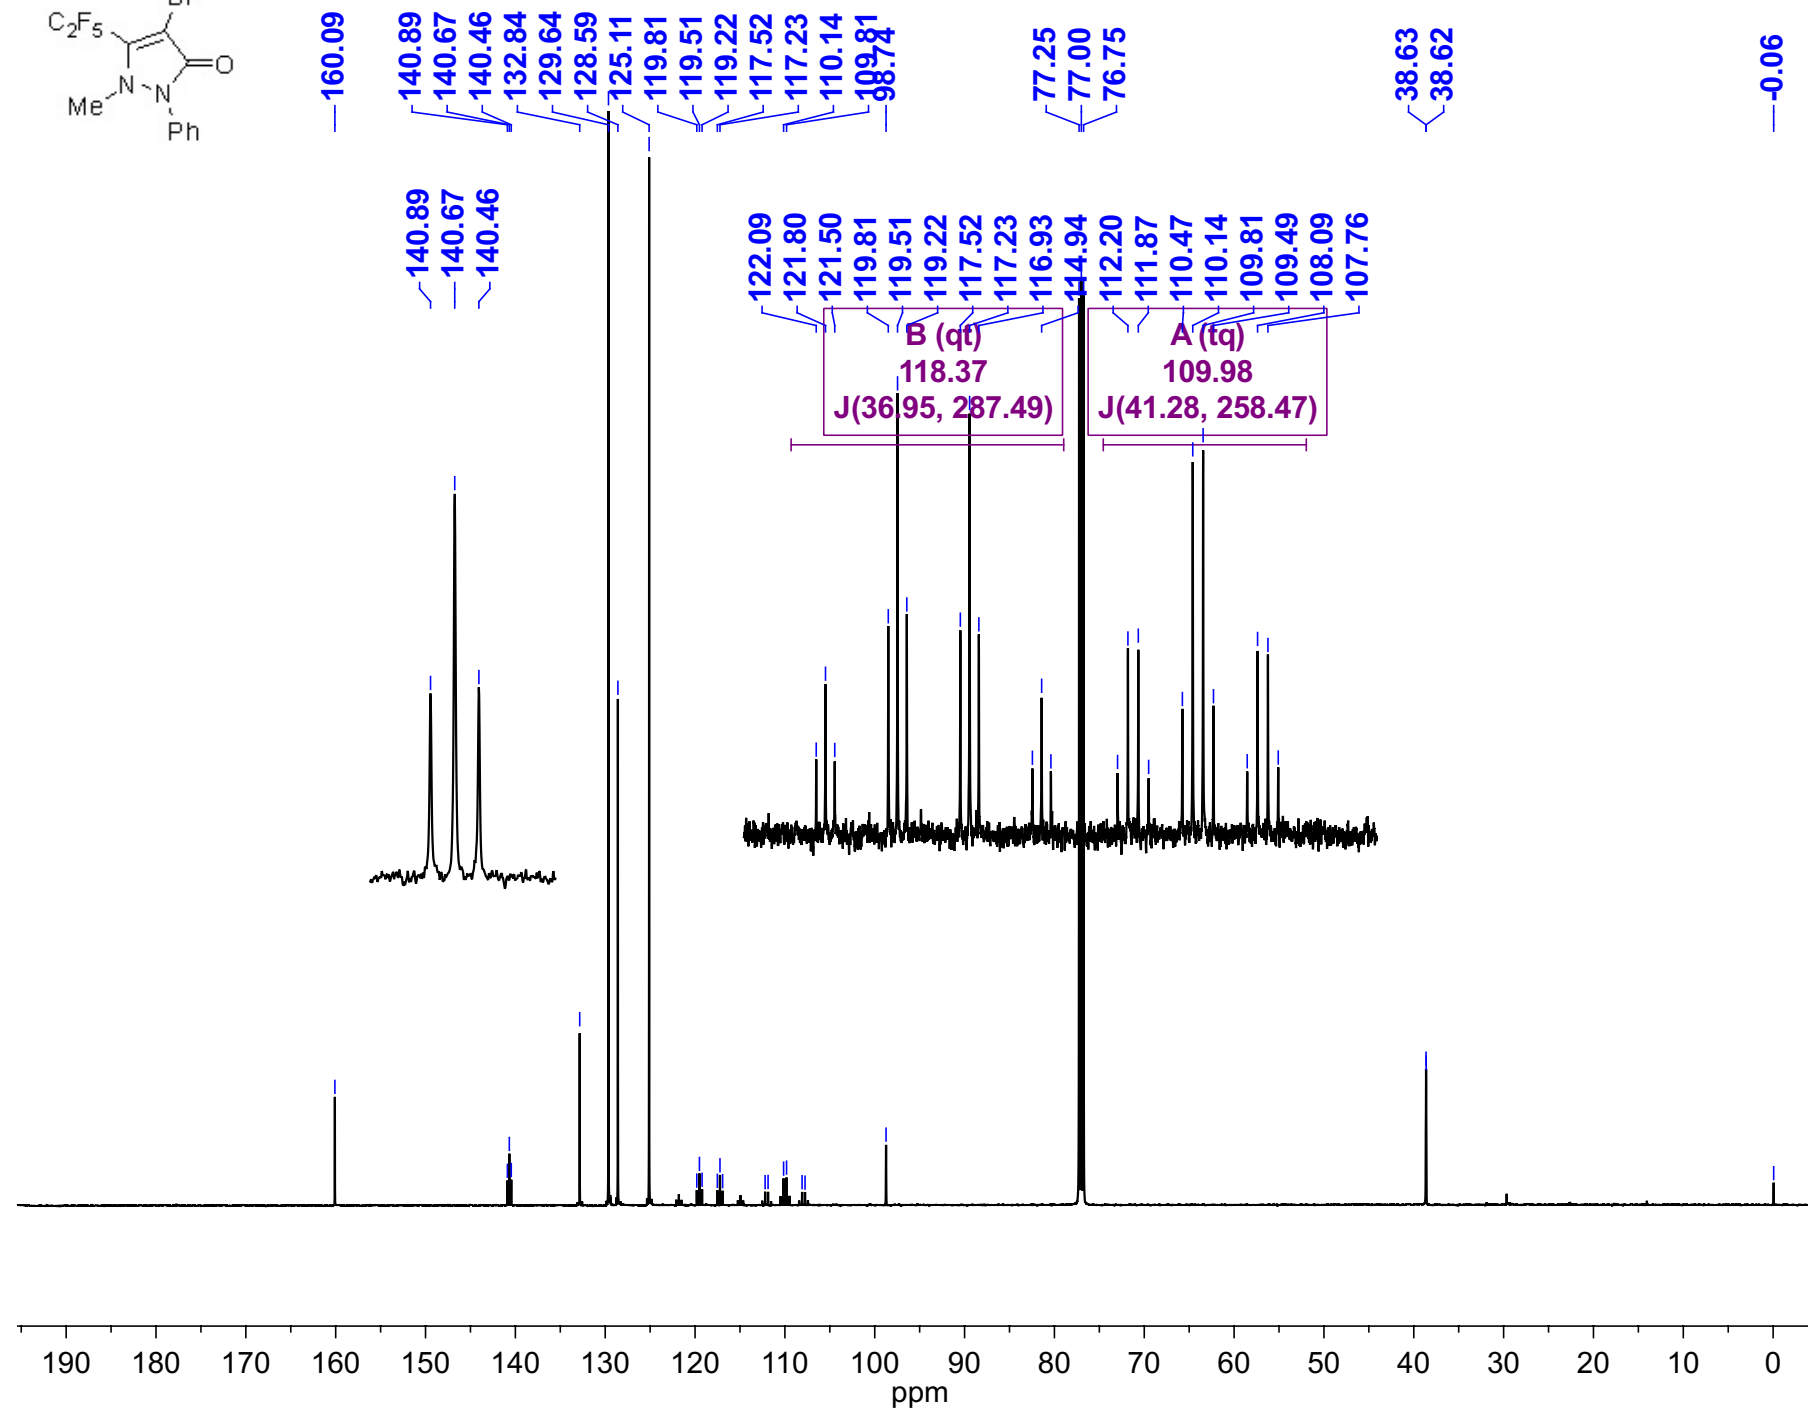

|                       |                 |
|-----------------------|-----------------|
| NAME                  | ESh705a         |
| EXPNO                 | 13              |
| PROCNO                | 1               |
| USER                  | uralnmr         |
| Date_                 | 20191225        |
| Time                  | 19.36           |
| INSTRUM               | AV500           |
| PROBHD                | 5 mm PABBO BB-  |
| PULPROG               | zgpg30          |
| SOLVENT               | CDCl3           |
| TD                    | 65536           |
| SW                    | 200.7838 ppm    |
| O1P                   | 95.000 ppm      |
| FIDRES                | 0.385323 Hz     |
| NS                    | 16384           |
| DS                    | 8               |
| AQ                    | 1.2976629 sec   |
| RG                    | 203             |
| TE                    | 295.8 K         |
| DE                    | 6.50 usec       |
| D1                    | 1.00000000 sec  |
| D11                   | 0.03000000 sec  |
| TD0                   | 16              |
| ==== CHANNEL f1 ===== |                 |
| NUC1                  | 13C             |
| P1                    | 10.00 usec      |
| PL1                   | 0.00 dB         |
| PL1W                  | 115.29558563 W  |
| SFO1                  | 125.7697360 MHz |
| ==== CHANNEL f2 ===== |                 |
| CPDPRG2               | waltz16         |
| NUC2                  | 1H              |
| PCPD2                 | 75.00 usec      |
| PL2                   | 120.00 dB       |
| PL12                  | 16.30 dB        |
| PL13                  | 19.30 dB        |
| PL2W                  | 0.00000000 W    |
| PL12W                 | 0.47519693 W    |
| PL13W                 | 0.23816262 W    |
| SFO2                  | 500.1320005 MHz |
| SI                    | 65536           |
| HZpPT                 | 0.385323 Hz     |
| SR                    | 2.23 Hz         |
| WDW                   | EM              |
| LB                    | 1.00 Hz         |
| GB                    | 0               |
| SSB                   | 0               |

<sup>19</sup>F NMR spectrum of compound **4b** in CDCl<sub>3</sub>

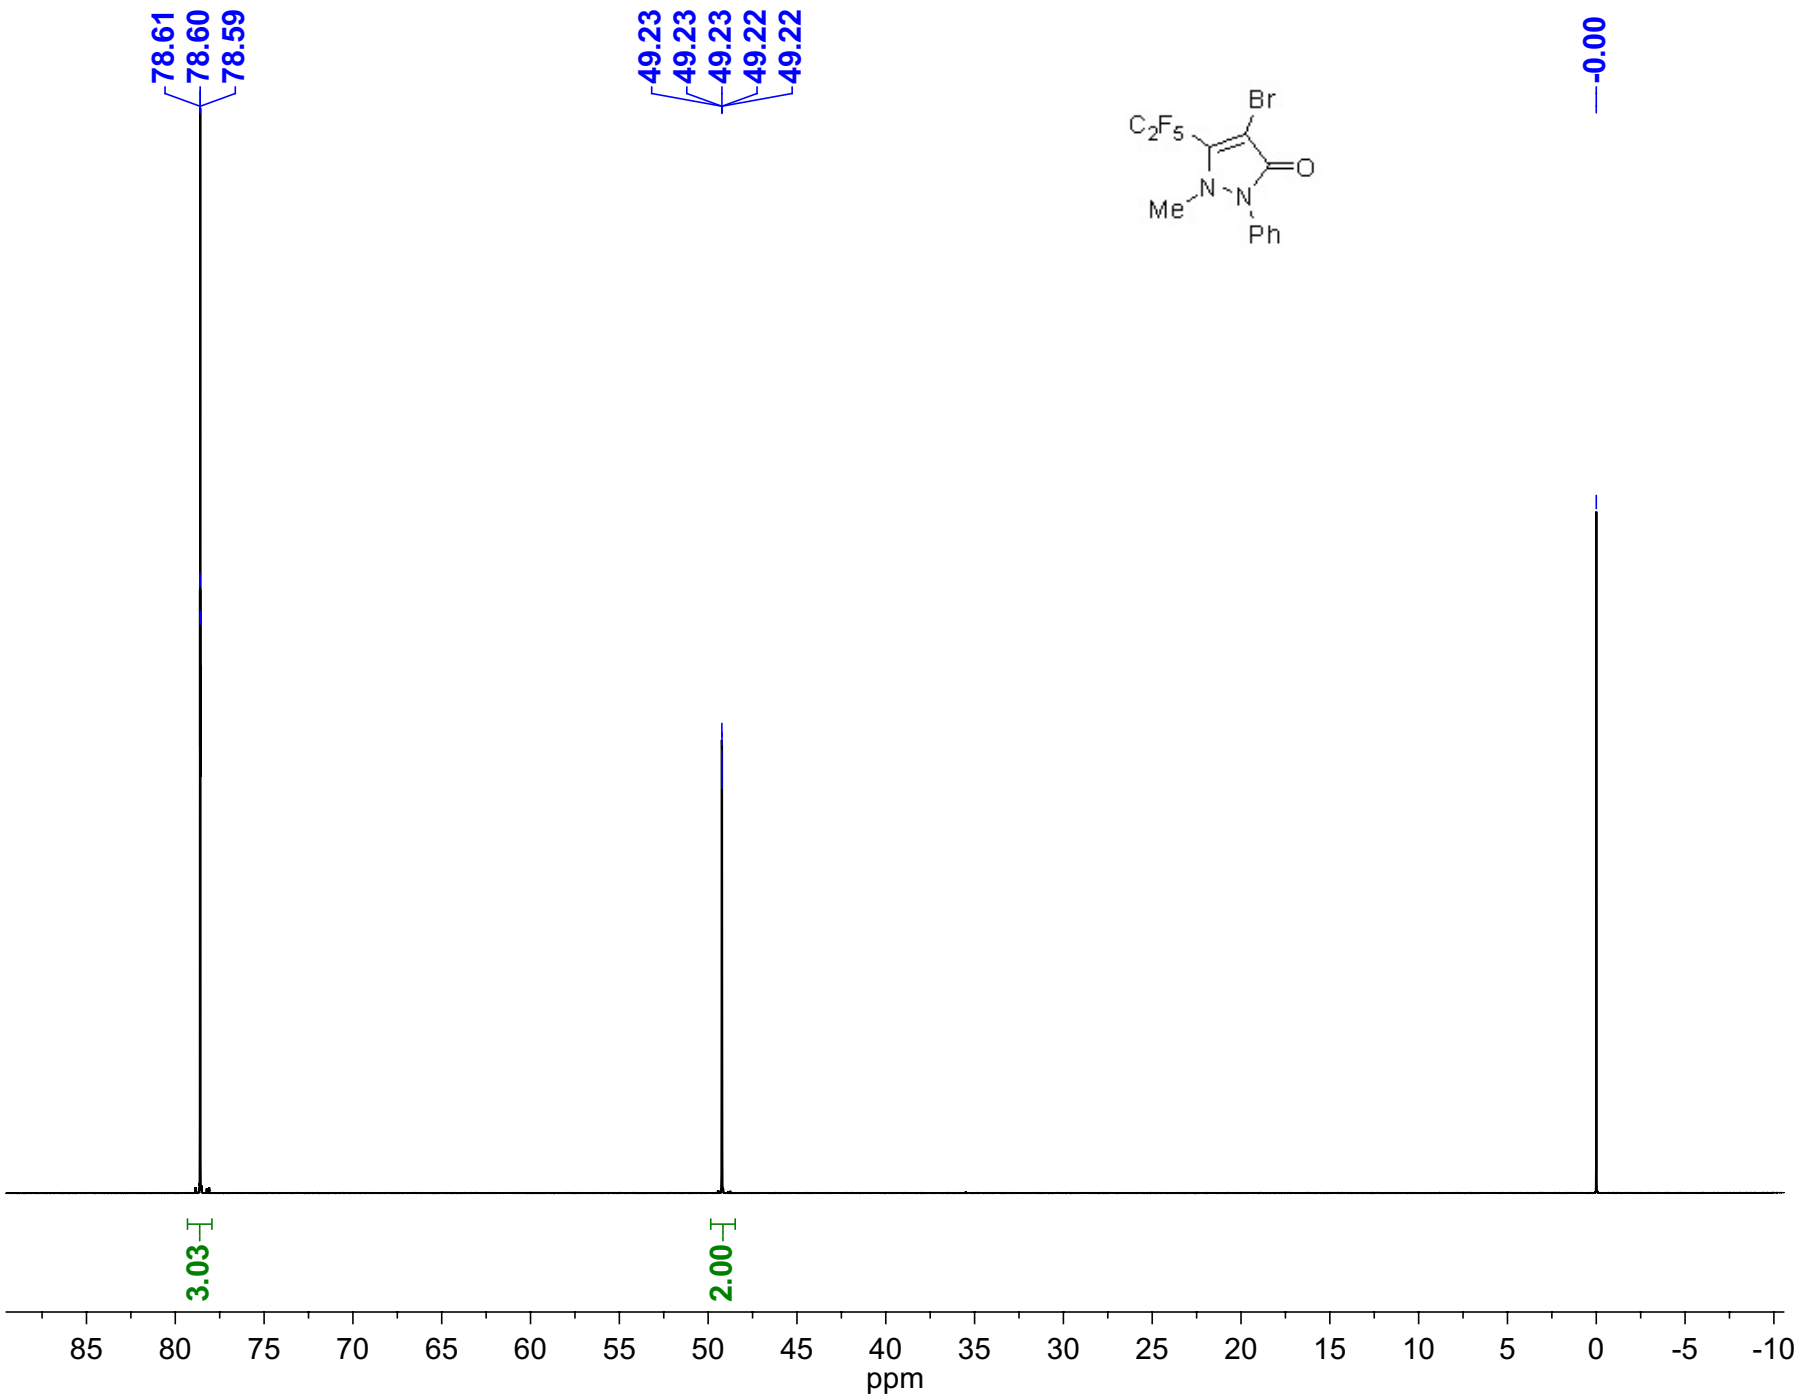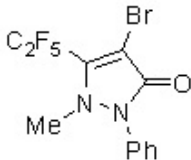

Current Data Parameters

NAME ESh705a  
EXPNO 19  
PROCNO 1  
USER uralhmr

F2 - Acquisition Parameters

Date\_ 20191219  
Time 13.40  
INSTRUM DRX400  
PROBHD 5 mm SEF 19F-1  
PULPROG zg30  
TD 262144  
SOLVENT CDCl<sub>3</sub>  
NS 16  
DS 2  
SWH 37664.785 Hz  
FIDRES 0.143680 Hz  
AQ 3.4800117 sec  
RG 912.3  
DW 13.275 usec  
DE 6.50 usec  
TE 298.2 K  
D1 1.00000000 sec  
MCREST 0.00000000 sec  
MCWRK 0.01500000 sec  
==== CHANNEL f1 =====  
NUC1 19F  
P1 10.10 usec  
PL1 0.00 dB  
SFO1 376.4523425 MHz

F2 - Processing parameters

SI 131072  
HZpPT 0.287360 Hz  
SF 376.4374801 MHz  
SR 195.11 Hz  
WDW EM  
LB 0.20 Hz  
GB 0  
SSB 0  
PC 3.00

<sup>1</sup>H NMR spectrum of compound **4c** in CDCl<sub>3</sub>

7.53  
7.51  
7.42  
7.41  
7.26

3.20

1.60

1.25

0.00

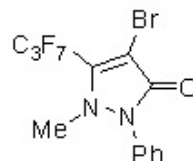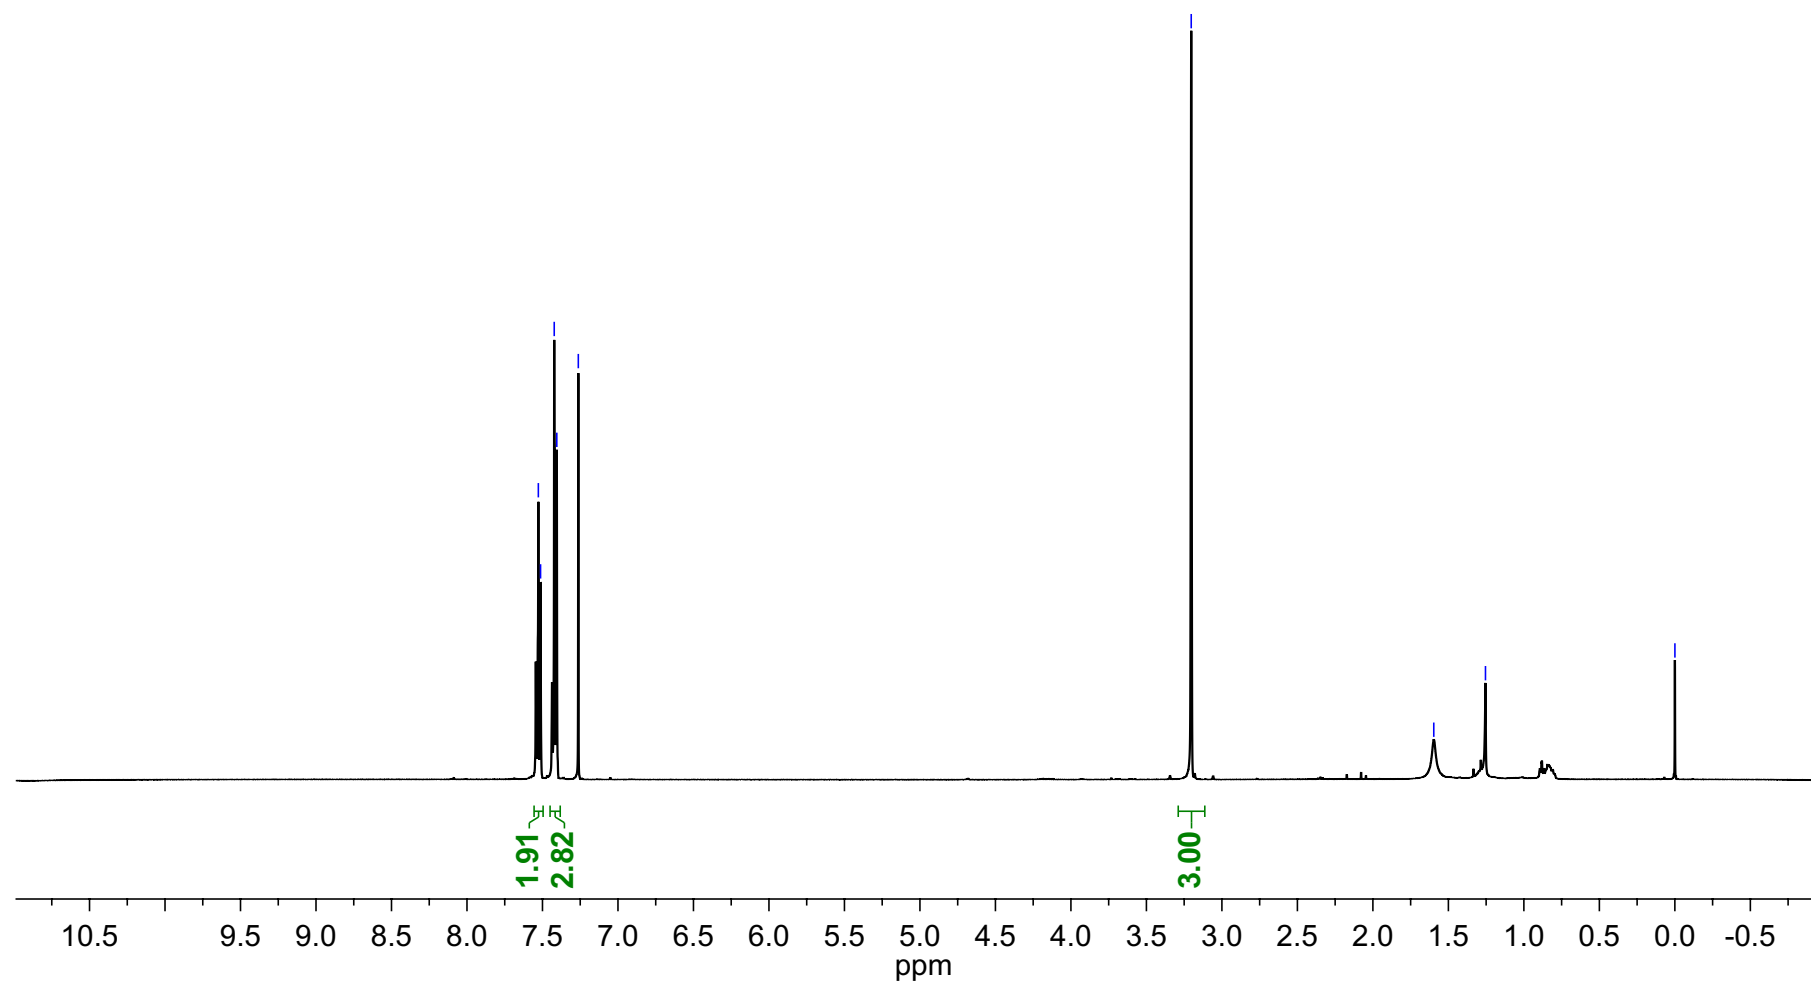

1.91  
2.82

3.00

1.60

1.25

0.00

|                       |                   |
|-----------------------|-------------------|
| NAME                  | Esh706            |
| EXPNO                 | 1                 |
| PROCNO                | 1                 |
| USER                  | uralhmr           |
| Date_                 | 20200110          |
| Time                  | 14.21             |
| INSTRUM               | AV500             |
| PROBHD                | 5 mm PABBO BB-    |
| PULPROG               | zg30              |
| SOLVENT               | CDCl <sub>3</sub> |
| TD                    | 32768             |
| SW                    | 12.0160 ppm       |
| O1P                   | 5.000 ppm         |
| FIDRES                | 0.183399 Hz       |
| NS                    | 16                |
| DS                    | 2                 |
| AQ                    | 2.7263477 sec     |
| RG                    | 203               |
| TE                    | 295.6 K           |
| DE                    | 6.50 usec         |
| D1                    | 1.00000000 sec    |
| TD0                   | 1                 |
| ==== CHANNEL f1 ===== |                   |
| NUC1                  | 1H                |
| P1                    | 12.00 usec        |
| PL1                   | 0.30 dB           |
| PL1W                  | 18.91792679 W     |
| SFO1                  | 500.1325007 MHz   |
| SI                    | 32768             |
| HZpPT                 | 0.183399 Hz       |
| SR                    | 11.57 Hz          |
| WDW                   | EM                |
| LB                    | 0.00 Hz           |
| GB                    | 0                 |
| SSB                   | 0                 |

<sup>13</sup>C NMR spectrum of compound **4c** in CDCl<sub>3</sub>

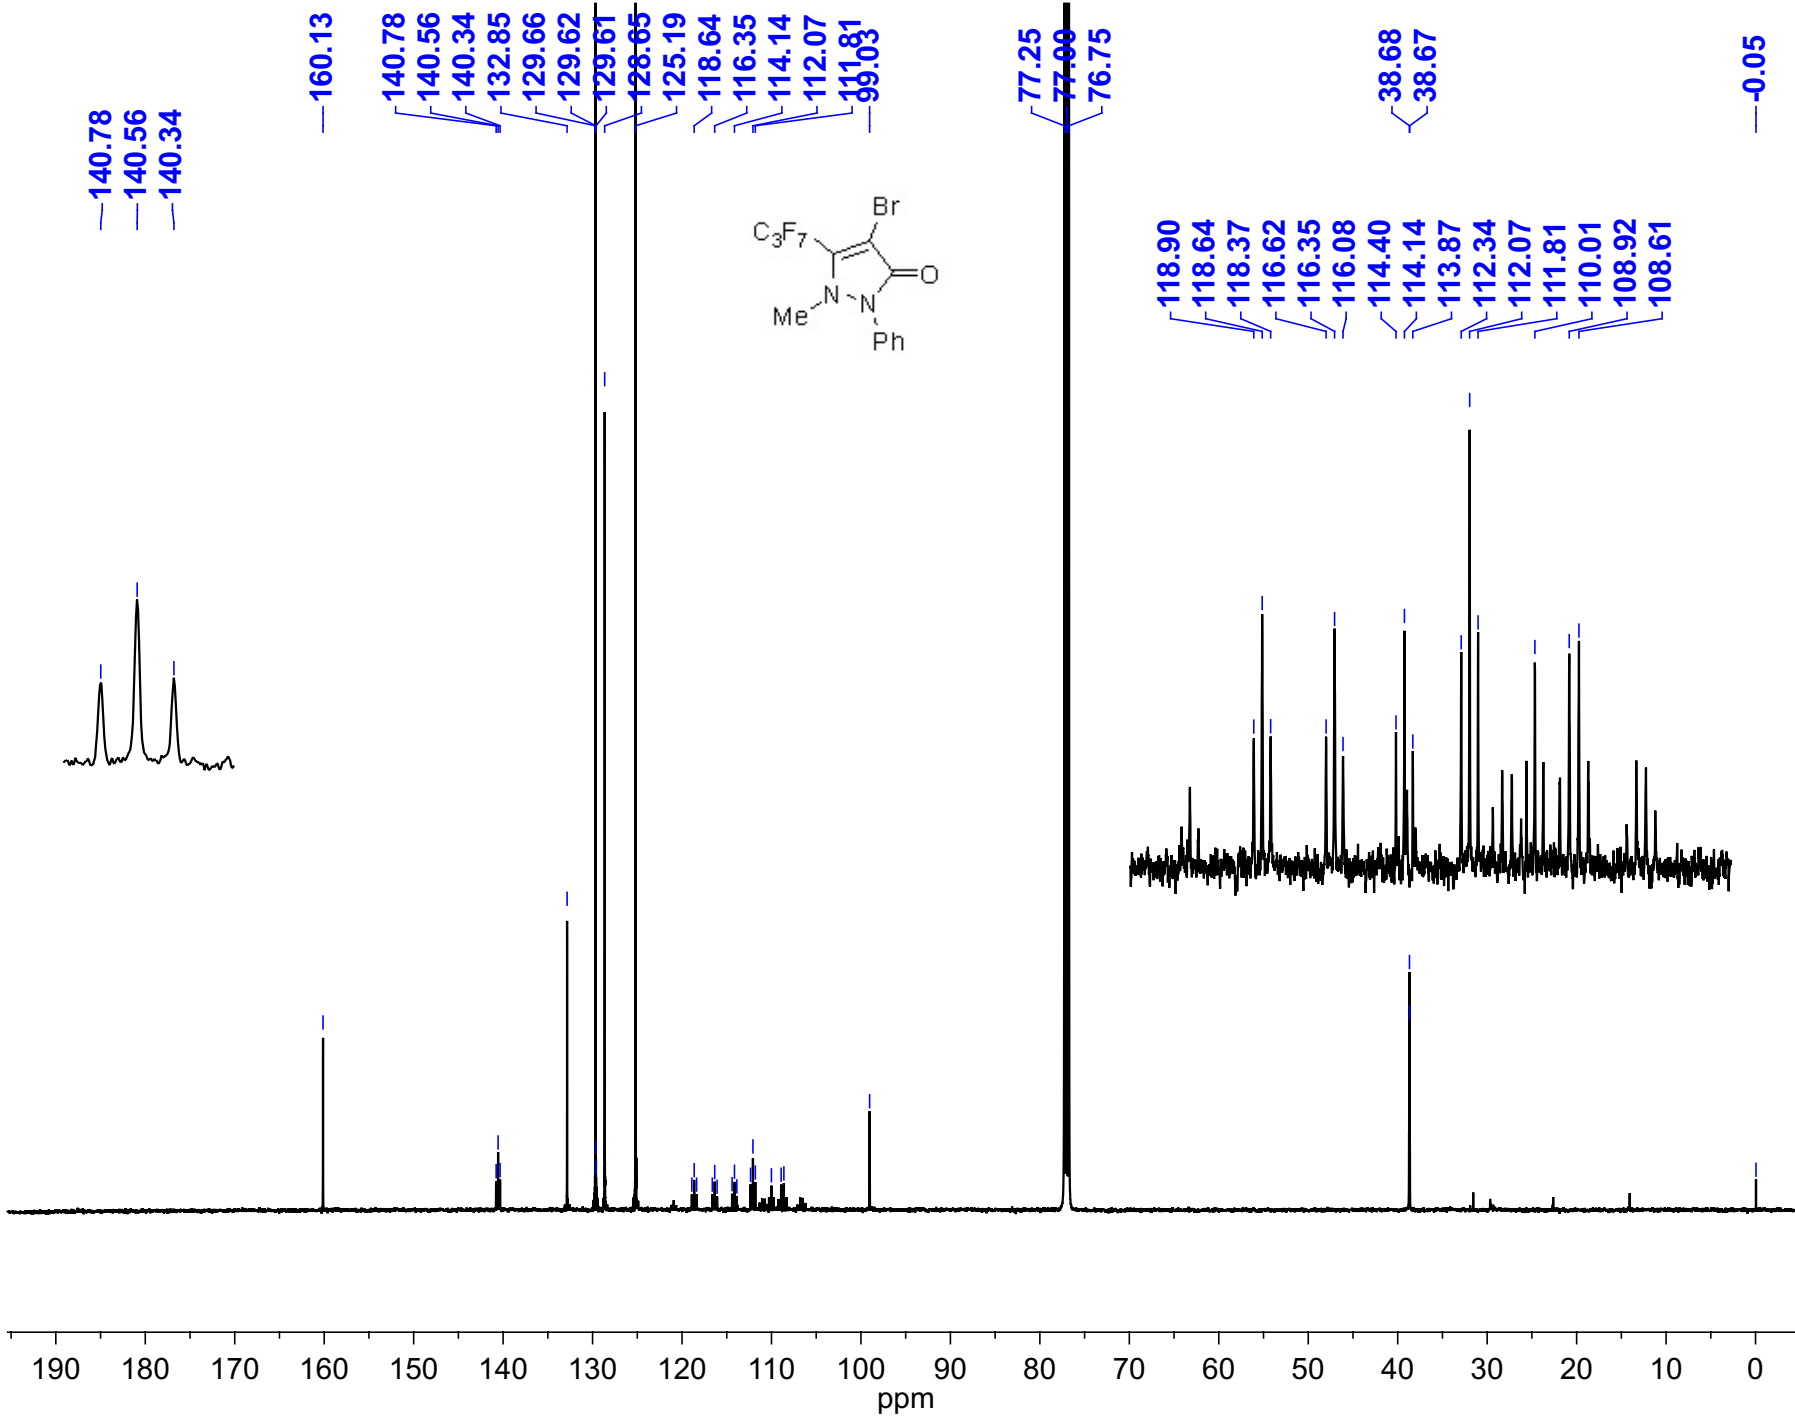

|                        |                 |
|------------------------|-----------------|
| NAME                   | ESh706          |
| EXPNO                  | 13              |
| PROCNO                 | 1               |
| USER                   | uralnmr         |
| Date_                  | 20200205        |
| Time                   | 18.28           |
| INSTRUM                | AV500           |
| PROBHD                 | 5 mm PABBO BB-  |
| PULPROG                | zgpg30          |
| SOLVENT                | CDCl3           |
| TD                     | 32768           |
| SW                     | 200.7838 ppm    |
| O1P                    | 95.000 ppm      |
| FIDRES                 | 0.770646 Hz     |
| NS                     | 28672           |
| DS                     | 8               |
| AQ                     | 0.6488564 sec   |
| RG                     | 203             |
| TE                     | 296.5 K         |
| DE                     | 6.50 usec       |
| D1                     | 1.00000000 sec  |
| D11                    | 0.03000000 sec  |
| TD0                    | 28              |
| ===== CHANNEL f1 ===== |                 |
| NUC1                   | <sup>13</sup> C |
| P1                     | 9.00 usec       |
| PL1                    | 0.00 dB         |
| PL1W                   | 115.29558563 W  |
| SFO1                   | 125.7697360 MHz |
| ===== CHANNEL f2 ===== |                 |
| CPDPRG2                | waltz16         |
| NUC2                   | <sup>1</sup> H  |
| PCPD2                  | 75.00 usec      |
| PL2                    | 120.00 dB       |
| PL12                   | 17.00 dB        |
| PL13                   | 20.00 dB        |
| PL2W                   | 0.00000000 W    |
| PL12W                  | 0.40445811 W    |
| PL13W                  | 0.20270923 W    |
| SFO2                   | 500.1320005 MHz |
| SI                     | 32768           |
| HZpPT                  | 0.770646 Hz     |
| SR                     | 1.55 Hz         |
| WDW                    | EM              |
| LB                     | 1.00 Hz         |
| GB                     | 0               |
| SSB                    | 0               |

<sup>19</sup>F NMR spectrum of compound **4c** in CDCl<sub>3</sub>

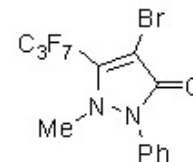

|                      |                 |
|----------------------|-----------------|
| NAME                 | ESh706          |
| EXPNO                | 19              |
| PROCNO               | 1               |
| USER                 | urahmr          |
| Date_                | 20200110        |
| Time                 | 14.26           |
| INSTRUM              | AV500           |
| PROBHD               | 5 mm PABBO BB-  |
| PULPROG              | zg30            |
| SOLVENT              | CDCl3           |
| TD                   | 131072          |
| SW                   | 99.6202 ppm     |
| O1P                  | 45.000 ppm      |
| FIDRES               | 0.357628 Hz     |
| NS                   | 16              |
| DS                   | 2               |
| AQ                   | 1.3981513 sec   |
| RG                   | 203             |
| TE                   | 295.6 K         |
| DE                   | 6.50 usec       |
| D1                   | 1.00000000 sec  |
| TD0                  | 1               |
| ==== CHANNEL f1 ==== |                 |
| NUC1                 | 19F             |
| P1                   | 15.50 usec      |
| PL1                  | -5.00 dB        |
| PL1W                 | 46.07103729 W   |
| SFO1                 | 470.5370532 MHz |
| SI                   | 131072          |
| HZpPT                | 0.357628 Hz     |
| SR                   | 400.40 Hz       |
| WDW                  | EM              |
| LB                   | 0.00 Hz         |
| GB                   | 0               |
| SSB                  | 0               |

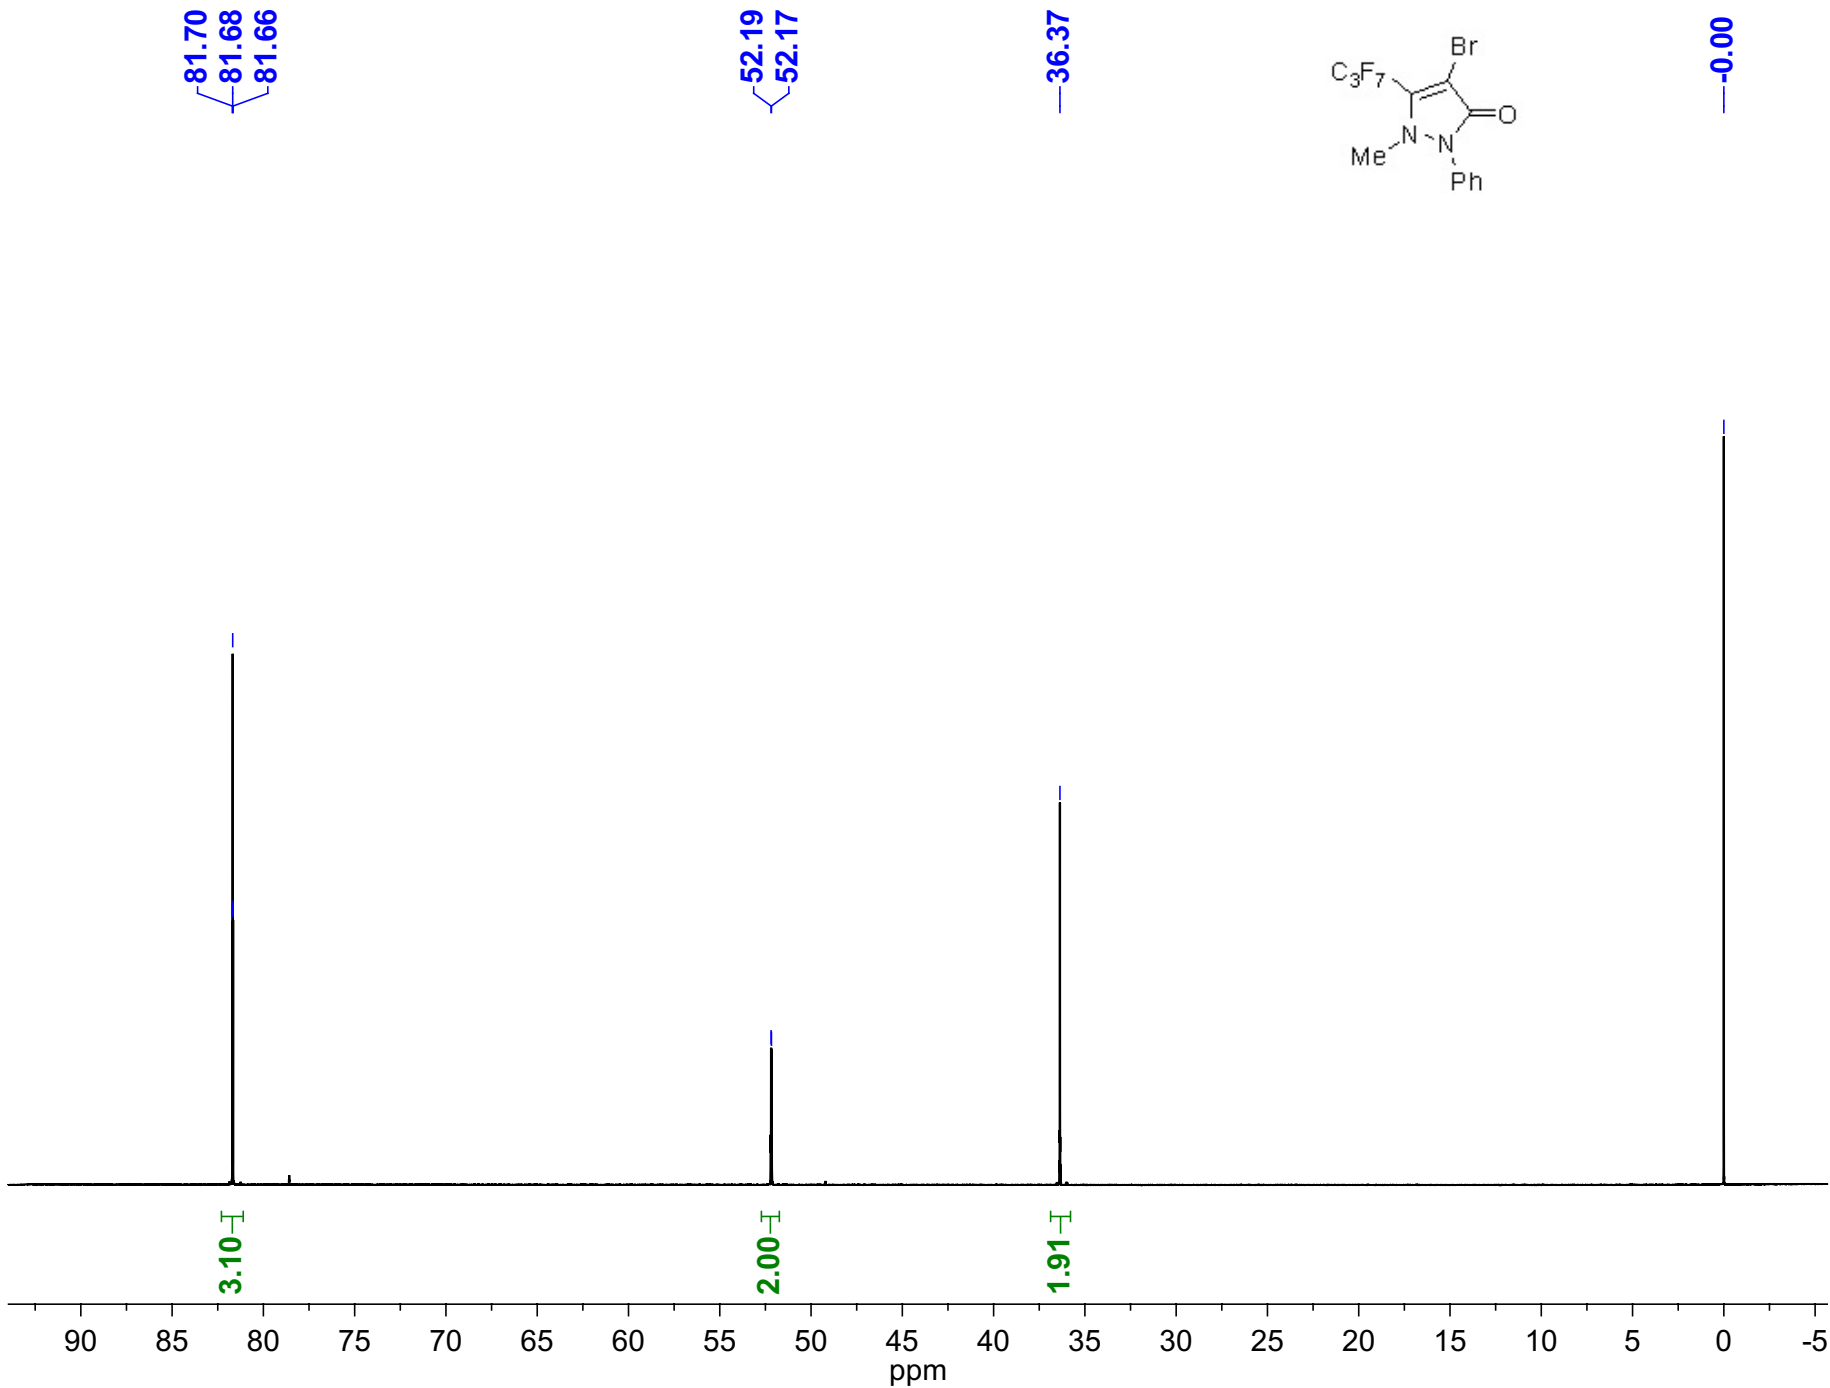

<sup>1</sup>H NMR spectrum of compound **4d** in CDCl<sub>3</sub>

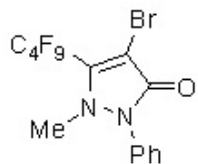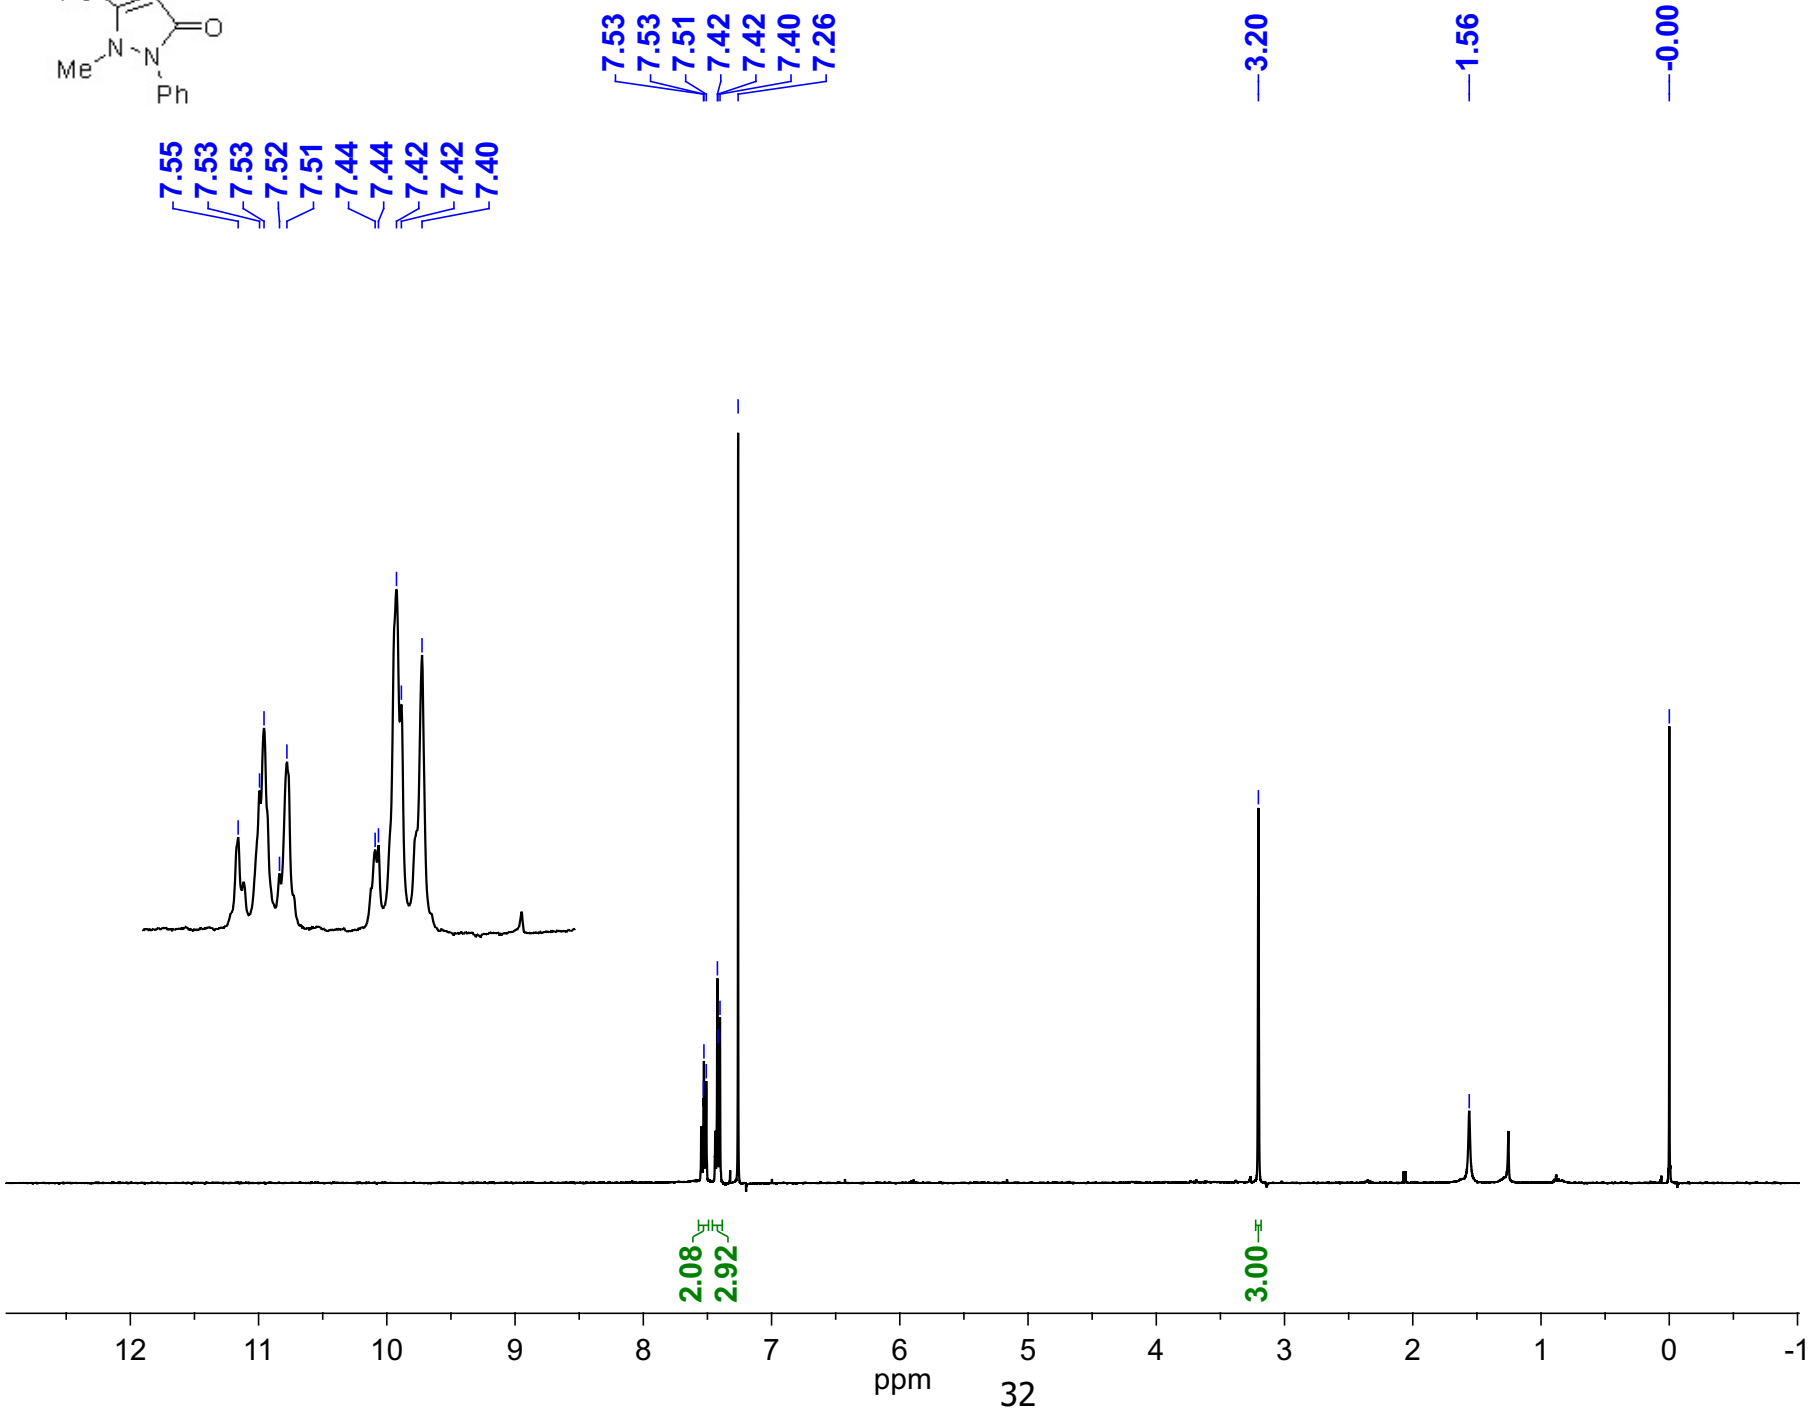

| Current Data Parameters     |                 |
|-----------------------------|-----------------|
| NAME                        | ESh717          |
| EXPNO                       | 1               |
| PROCNO                      | 1               |
| USER                        | uralnmr         |
| F2 - Acquisition Parameters |                 |
| Date_                       | 20200206        |
| Time                        | 12.38           |
| INSTRUM                     | DRX400          |
| PROBHD                      | 5 mm SEF 19F-1  |
| PULPROG                     | zg30            |
| TD                          | 32768           |
| SOLVENT                     | CDCl3           |
| NS                          | 16              |
| DS                          | 2               |
| SWH                         | 5592.841 Hz     |
| FIDRES                      | 0.170680 Hz     |
| AQ                          | 2.9295092 sec   |
| RG                          | 1149.4          |
| DW                          | 89.400 usec     |
| DE                          | 6.00 usec       |
| TE                          | 297.2 K         |
| D1                          | 1.00000000 sec  |
| MCREST                      | 0.00000000 sec  |
| MCWRK                       | 0.01500000 sec  |
| ==== CHANNEL f1 =====       |                 |
| NUC1                        | 1H              |
| P1                          | 20.00 usec      |
| PL1                         | 0.00 dB         |
| SFO1                        | 400.1324008 MHz |
| F2 - Processing parameters  |                 |
| SI                          | 32768           |
| HZpPT                       | 0.170680 Hz     |
| SF                          | 400.1300091 MHz |
| SR                          | 9.05 Hz         |
| WDW                         | EM              |
| LB                          | 0.00 Hz         |
| GB                          | 0               |
| SSB                         | 0               |
| PC                          | 4.00            |



<sup>13</sup>C NMR spectrum of compound **4d** in CDCl<sub>3</sub>

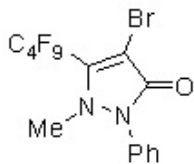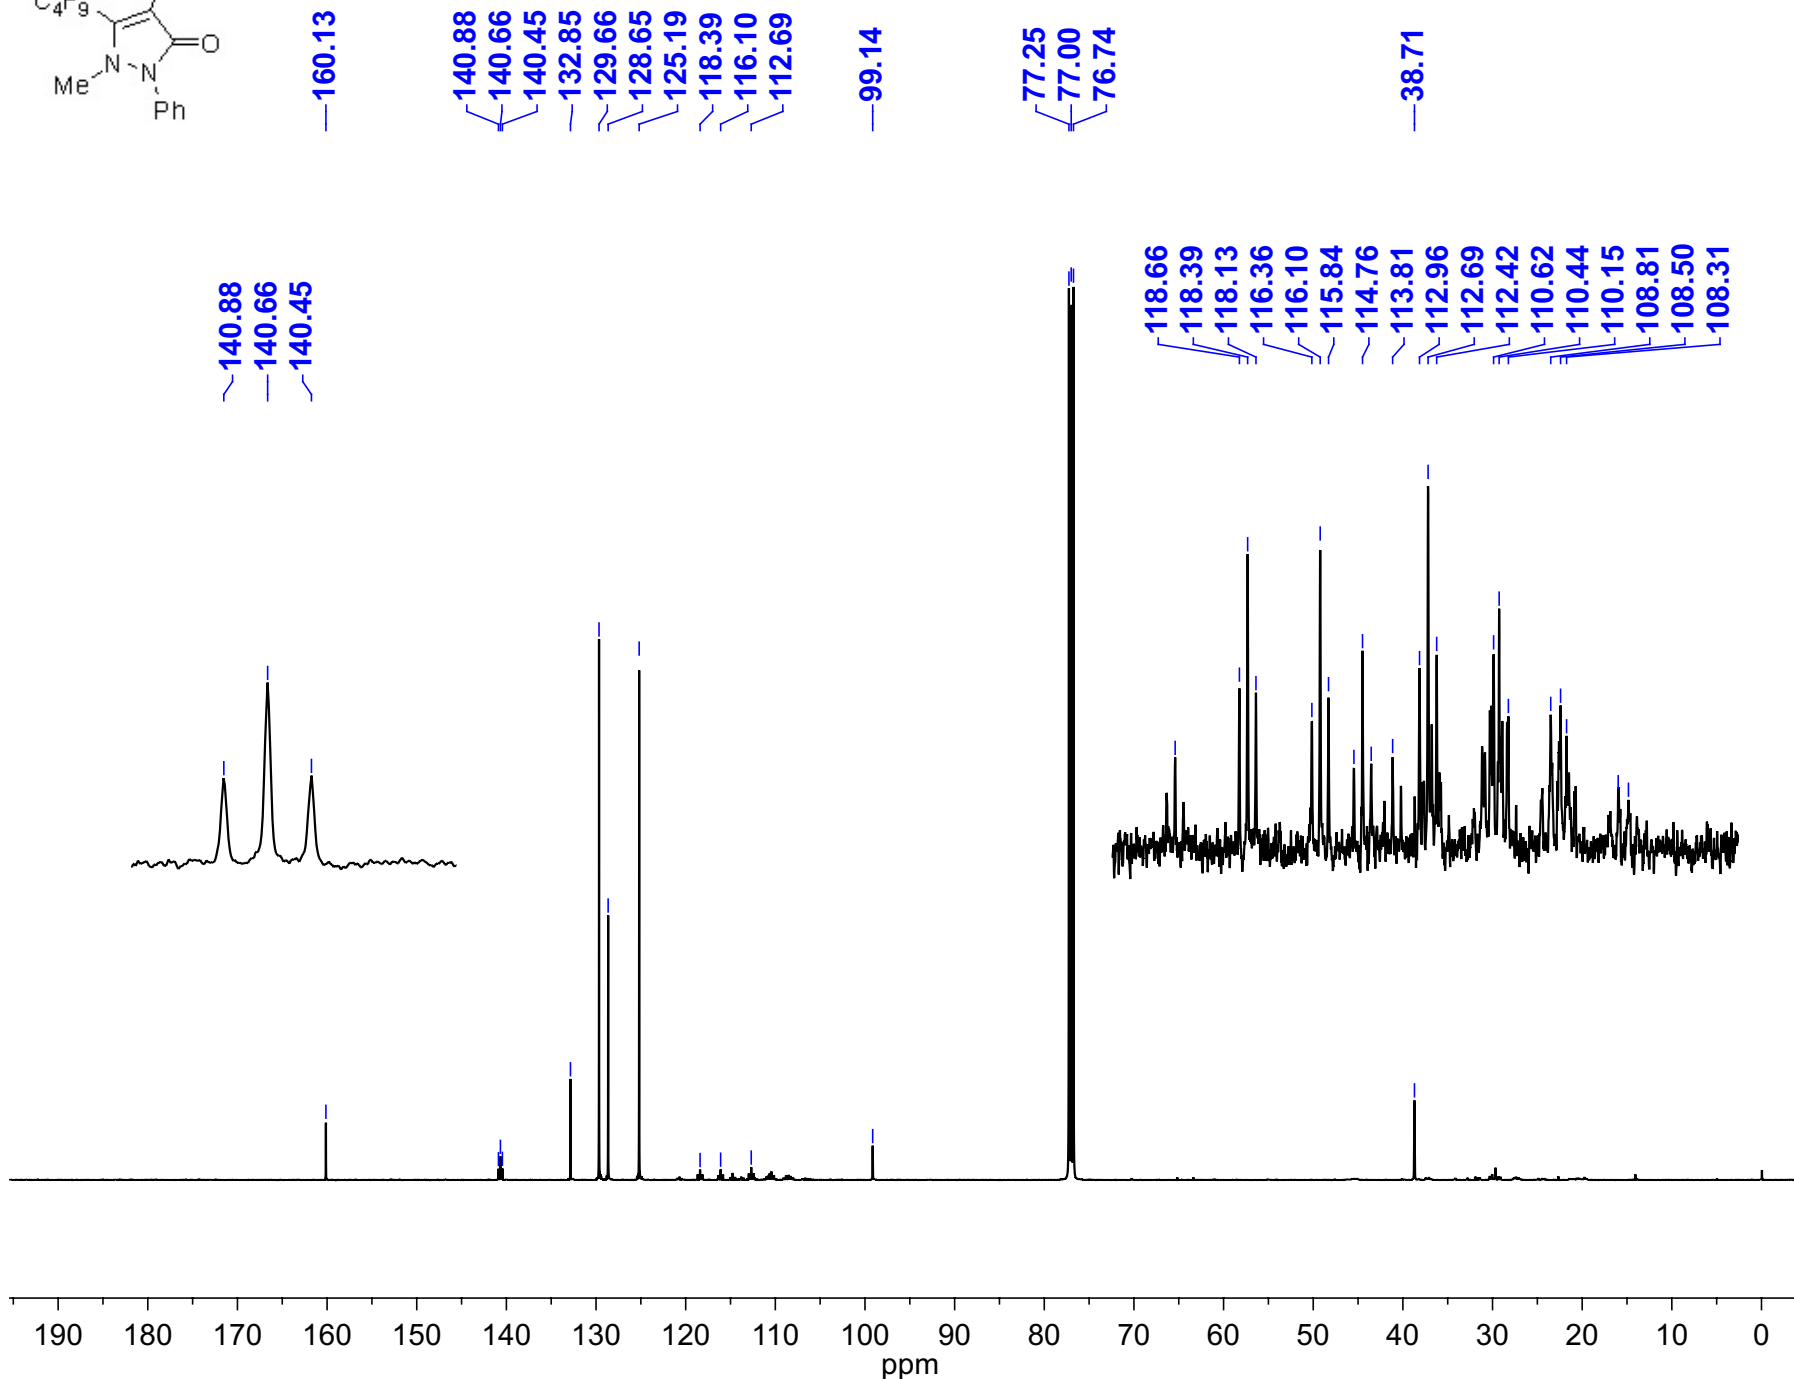

|                       |                 |
|-----------------------|-----------------|
| NAME                  | ESh717          |
| EXPNO                 | 13              |
| PROCNO                | 1               |
| USER                  | uralnmr         |
| Date_                 | 20200213        |
| Time                  | 17.13           |
| INSTRUM               | AV500           |
| PROBHD                | 5 mm PABBO BB-  |
| PULPROG               | zgpg30          |
| SOLVENT               | CDCl3           |
| TD                    | 32768           |
| SW                    | 200.7838 ppm    |
| O1P                   | 95.000 ppm      |
| FIDRES                | 0.770646 Hz     |
| NS                    | 34816           |
| DS                    | 8               |
| AQ                    | 0.6488564 sec   |
| RG                    | 203             |
| TE                    | 295.7 K         |
| DE                    | 6.50 usec       |
| D1                    | 1.00000000 sec  |
| D11                   | 0.03000000 sec  |
| TD0                   | 34              |
| ==== CHANNEL f1 ===== |                 |
| NUC1                  | 13C             |
| P1                    | 9.00 usec       |
| PL1                   | 0.00 dB         |
| PL1W                  | 115.29558563 W  |
| SFO1                  | 125.7697360 MHz |
| ==== CHANNEL f2 ===== |                 |
| CPDPRG2               | waltz16         |
| NUC2                  | 1H              |
| PCPD2                 | 75.00 usec      |
| PL2                   | 120.00 dB       |
| PL12                  | 17.00 dB        |
| PL13                  | 20.00 dB        |
| PL2W                  | 0.00000000 W    |
| PL12W                 | 0.40445811 W    |
| PL13W                 | 0.20270923 W    |
| SFO2                  | 500.1320005 MHz |
| SI                    | 32768           |
| HZpPT                 | 0.770646 Hz     |
| SR                    | 1.43 Hz         |
| WDW                   | EM              |
| LB                    | 1.50 Hz         |
| GB                    | 0               |
| SSB                   | 0               |

<sup>19</sup>F NMR spectrum of compound **4d** in CDCl<sub>3</sub>

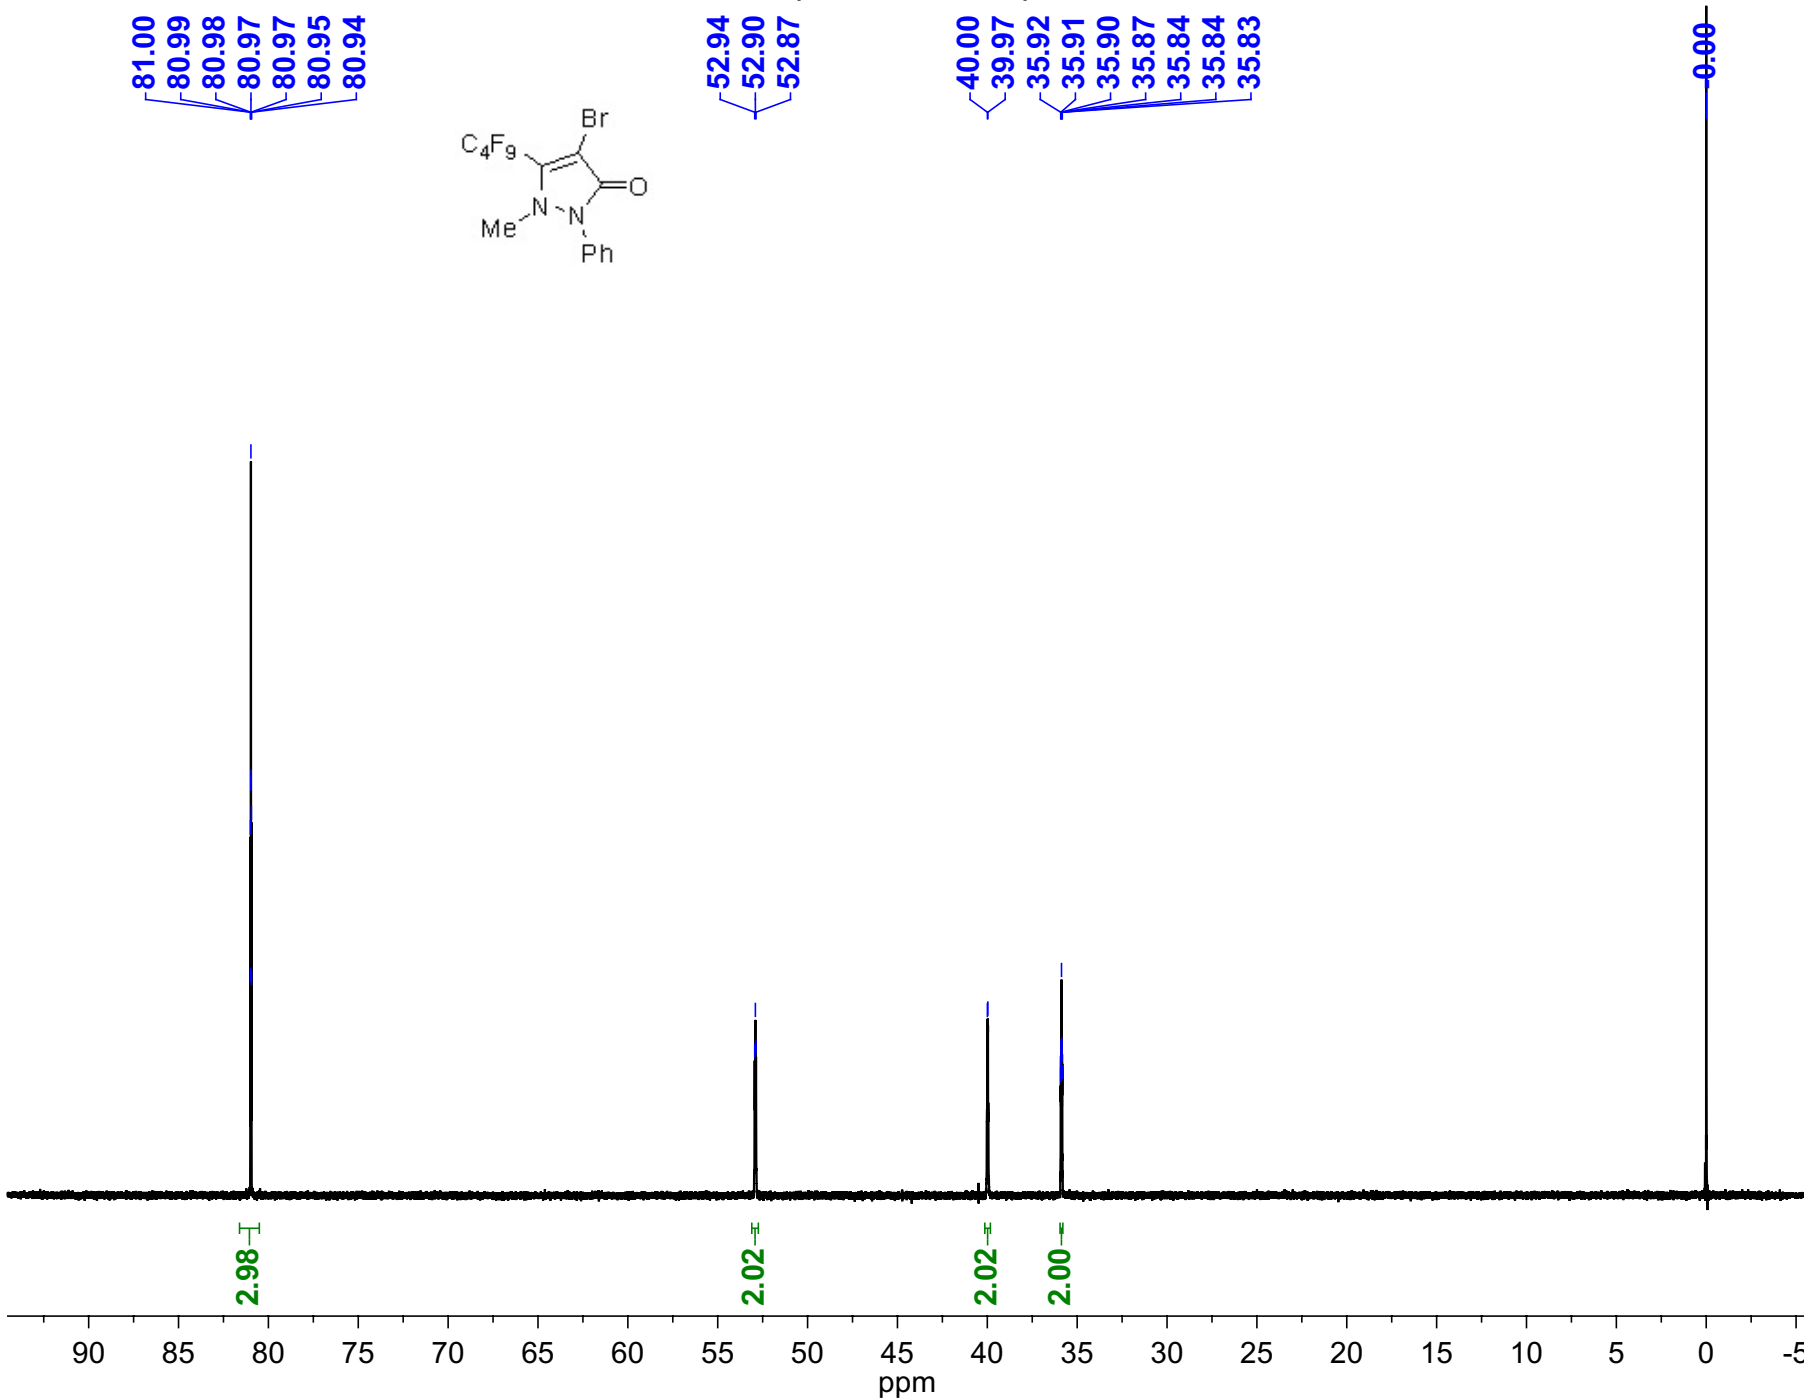

Current Data Parameters

NAME ESh717  
EXPNO 19  
PROCNO 1  
USER urahmr

F2 - Acquisition Parameters

Date\_ 20200206  
Time 12.48  
INSTRUM DRX400  
PROBHD 5 mm SEF 19F-1  
PULPROG zg30  
TD 131072  
SOLVENT CDCB  
NS 16  
DS 2  
SWH 37664.785 Hz  
FIDRES 0.287360 Hz  
AQ 1.7400308 sec  
RG 2298.8  
DW 13.275 usec  
DE 6.50 usec  
TE 297.2 K  
D1 1.00000000 sec  
MCREST 0.00000000 sec  
MCWRK 0.01500000 sec  
==== CHANNEL f1 =====  
NUC1 19F  
P1 10.10 usec  
PL1 0.00 dB  
SFO1 376.4542247 MHz

F2 - Processing parameters

SI 131072  
HZpPT 0.287360 Hz  
SF 376.4374841 MHz  
SR 199.13 Hz  
WDW EM  
LB 0.00 Hz  
GB 0  
SSB 0  
PC 3.00

<sup>1</sup>H NMR spectrum of compound **5a** in CDCl<sub>3</sub>

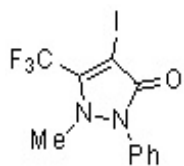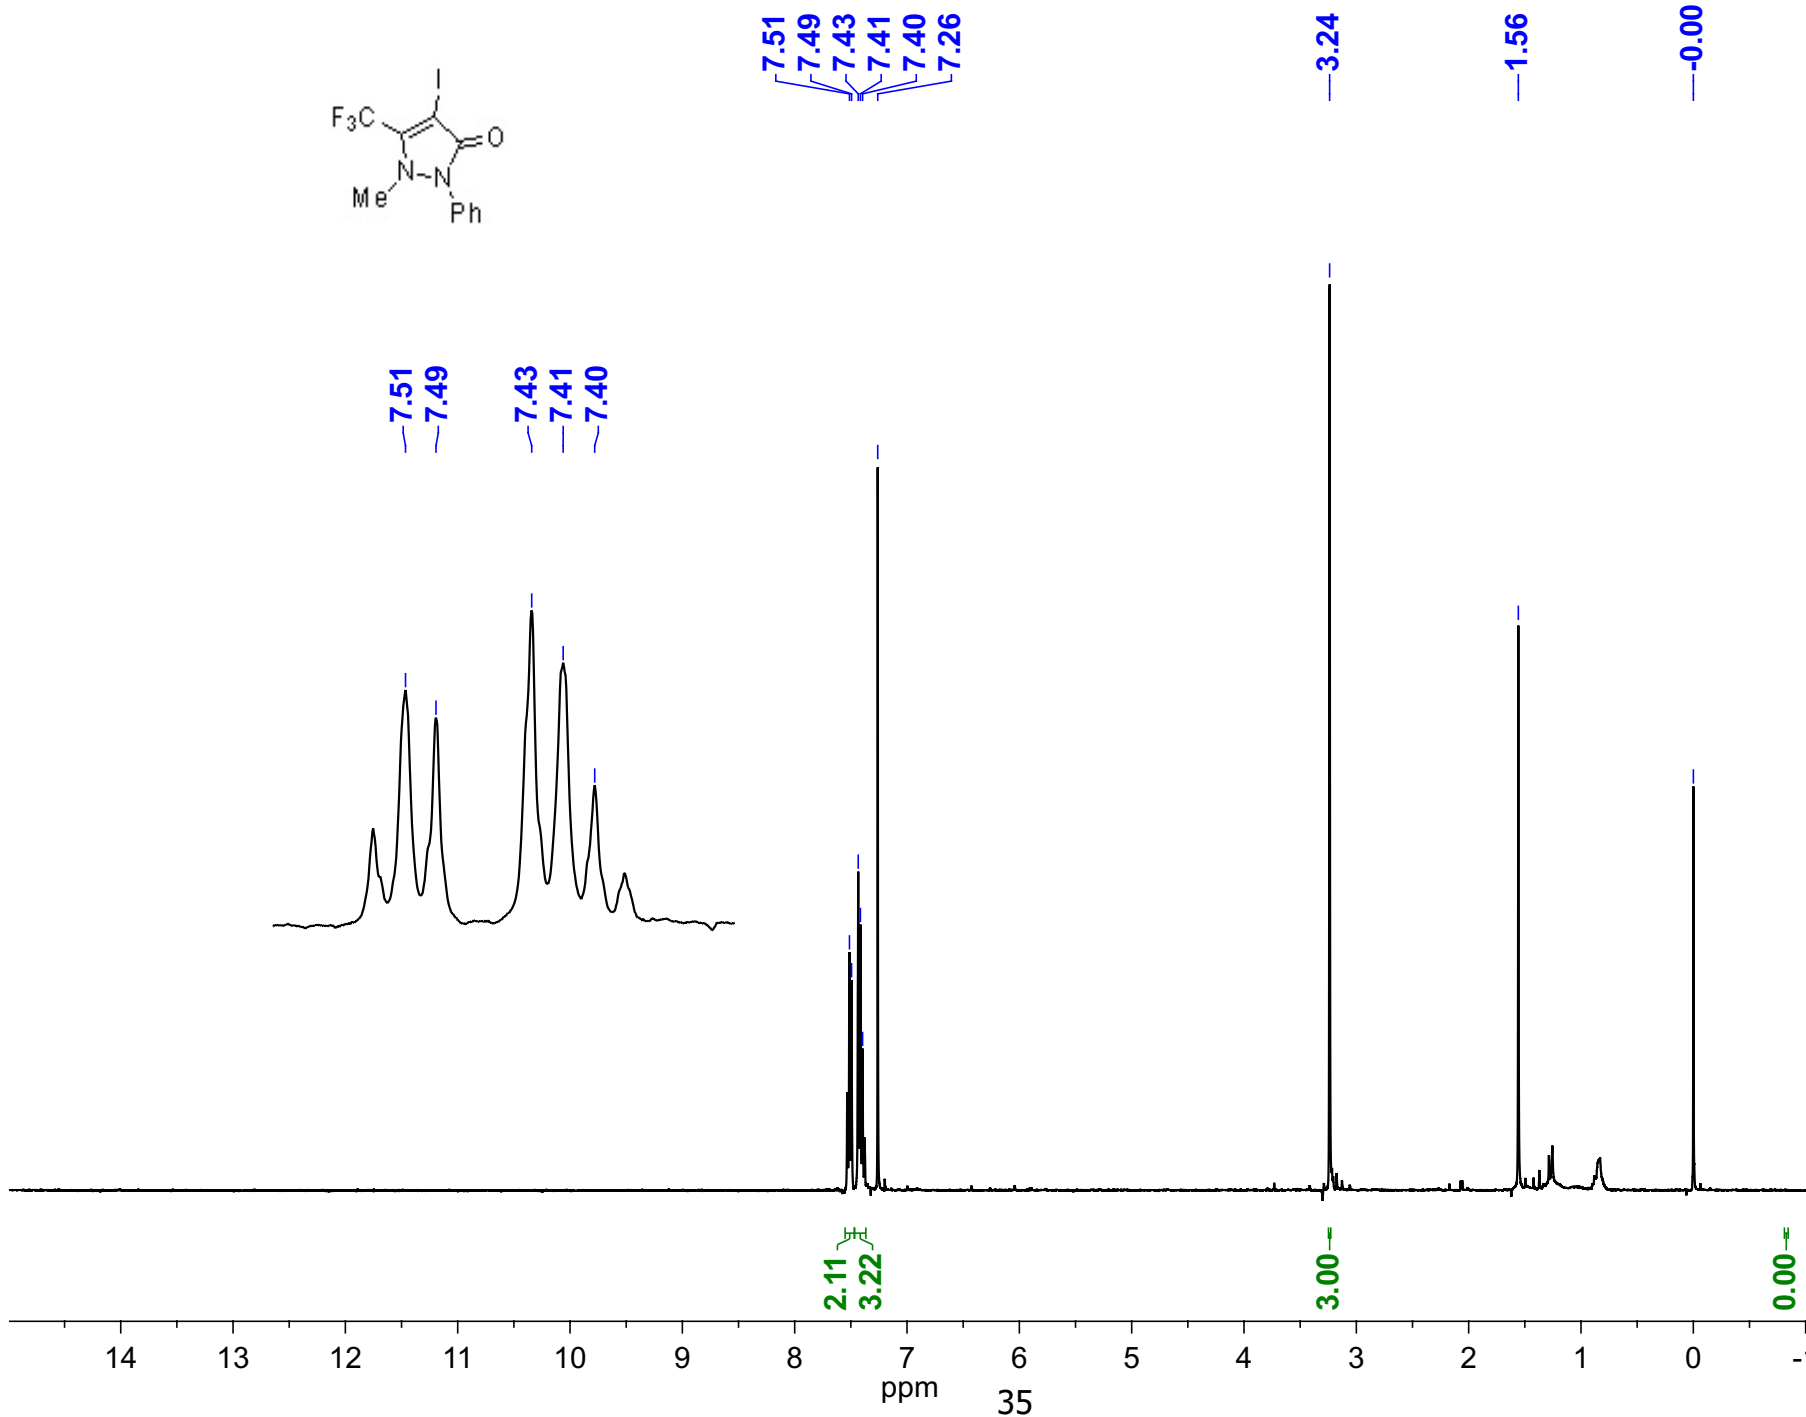

Current Data Parameters

NAME ESh811b  
EXPNO 1  
PROCNO 1  
USER urahmr

F2 - Acquisition Parameters

Date\_ 20210416  
Time 13.41  
INSTRUM DRX400  
PROBHD 5 mm SEF 19F-1  
PULPROG zg30  
TD 32768  
SOLVENT CDCl3  
NS 16  
DS 2  
SWH 6410.256 Hz  
FIDRES 0.195625 Hz  
AQ 2.5559540 sec  
RG 1625.5  
DW 78.000 usec  
DE 16.00 usec  
TE 297.2 K  
D1 1.00000000 sec  
MCREST 0.00000000 sec  
MCWRK 0.01500000 sec

==== CHANNEL f1 ====

NUC1 1H  
P1 32.50 usec  
PL1 -4.00 dB  
SFO1 400.1328009 MHz

F2 - Processing parameters

SI 32768  
HZpPT 0.195625 Hz  
SF 400.1300092 MHz  
SR 9.16 Hz  
WDW EM  
LB 0.00 Hz  
GB 0  
SSB 0  
PC 4.00

<sup>13</sup>C NMR spectrum of compound **5a** in CDCl<sub>3</sub>

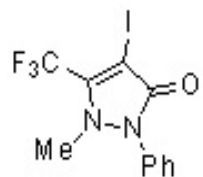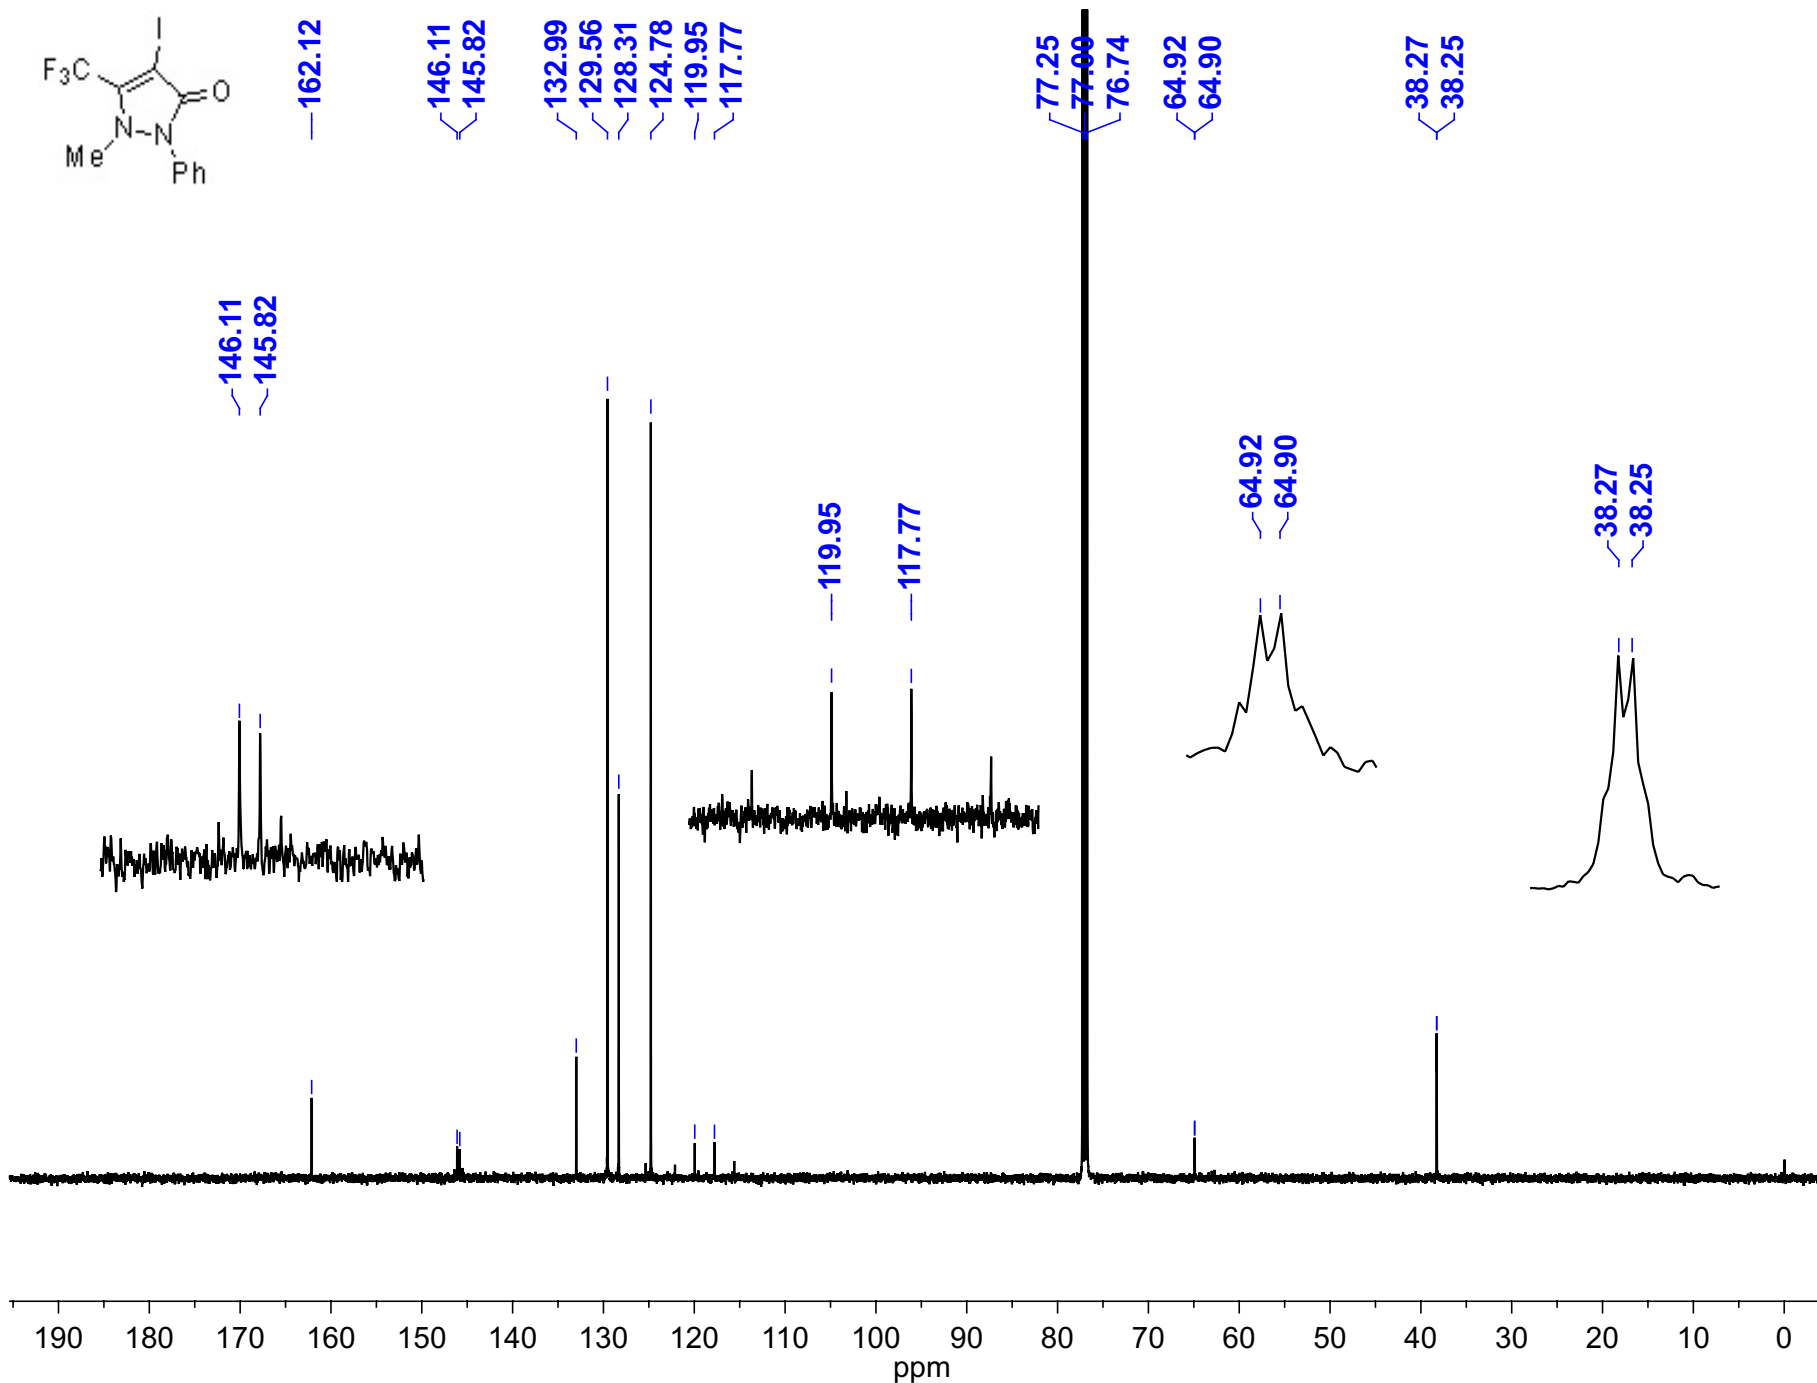

NAME ESh811b  
 EXPNO 13  
 PROCNO 1  
 USER uralnmr  
 Date\_ 20210611  
 Time 14.23  
 INSTRUM AV500  
 PROBHD 5 mm PABBO BB-  
 PULPROG zgpg30  
 SOLVENT CDCl3  
 TD 32768  
 SW 200.7838 ppm  
 O1P 95.000 ppm  
 FIDRES 0.770646 Hz  
 NS 1024  
 DS 8  
 AQ 0.6488564 sec  
 RG 203  
 TE 296.1 K  
 DE 6.50 usec  
 D1 1.00000000 sec  
 D11 0.03000000 sec  
 TD0 1

==== CHANNEL f1 =====  
 NUC1 13C  
 P1 10.00 usec  
 PL1 0.00 dB  
 PL1W 115.29558563 W  
 SFO1 125.7697360 MHz

==== CHANNEL f2 =====  
 CPDPRG2 waltz16  
 NUC2 1H  
 PCPD2 75.00 usec  
 PL2 120.00 dB  
 PL12 16.30 dB  
 PL13 19.30 dB  
 PL2W 0.00000000 W  
 PL12W 0.47519693 W  
 PL13W 0.23816262 W  
 SFO2 500.1320005 MHz  
 SI 32768  
 HZpPT 0.770646 Hz  
 SR 5.28 Hz  
 WDW EM  
 LB 1.00 Hz  
 GB 0  
 SSB 0

<sup>19</sup>F NMR spectrum of compound **5a** in CDCl<sub>3</sub>

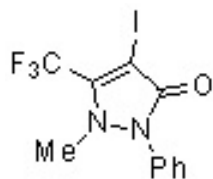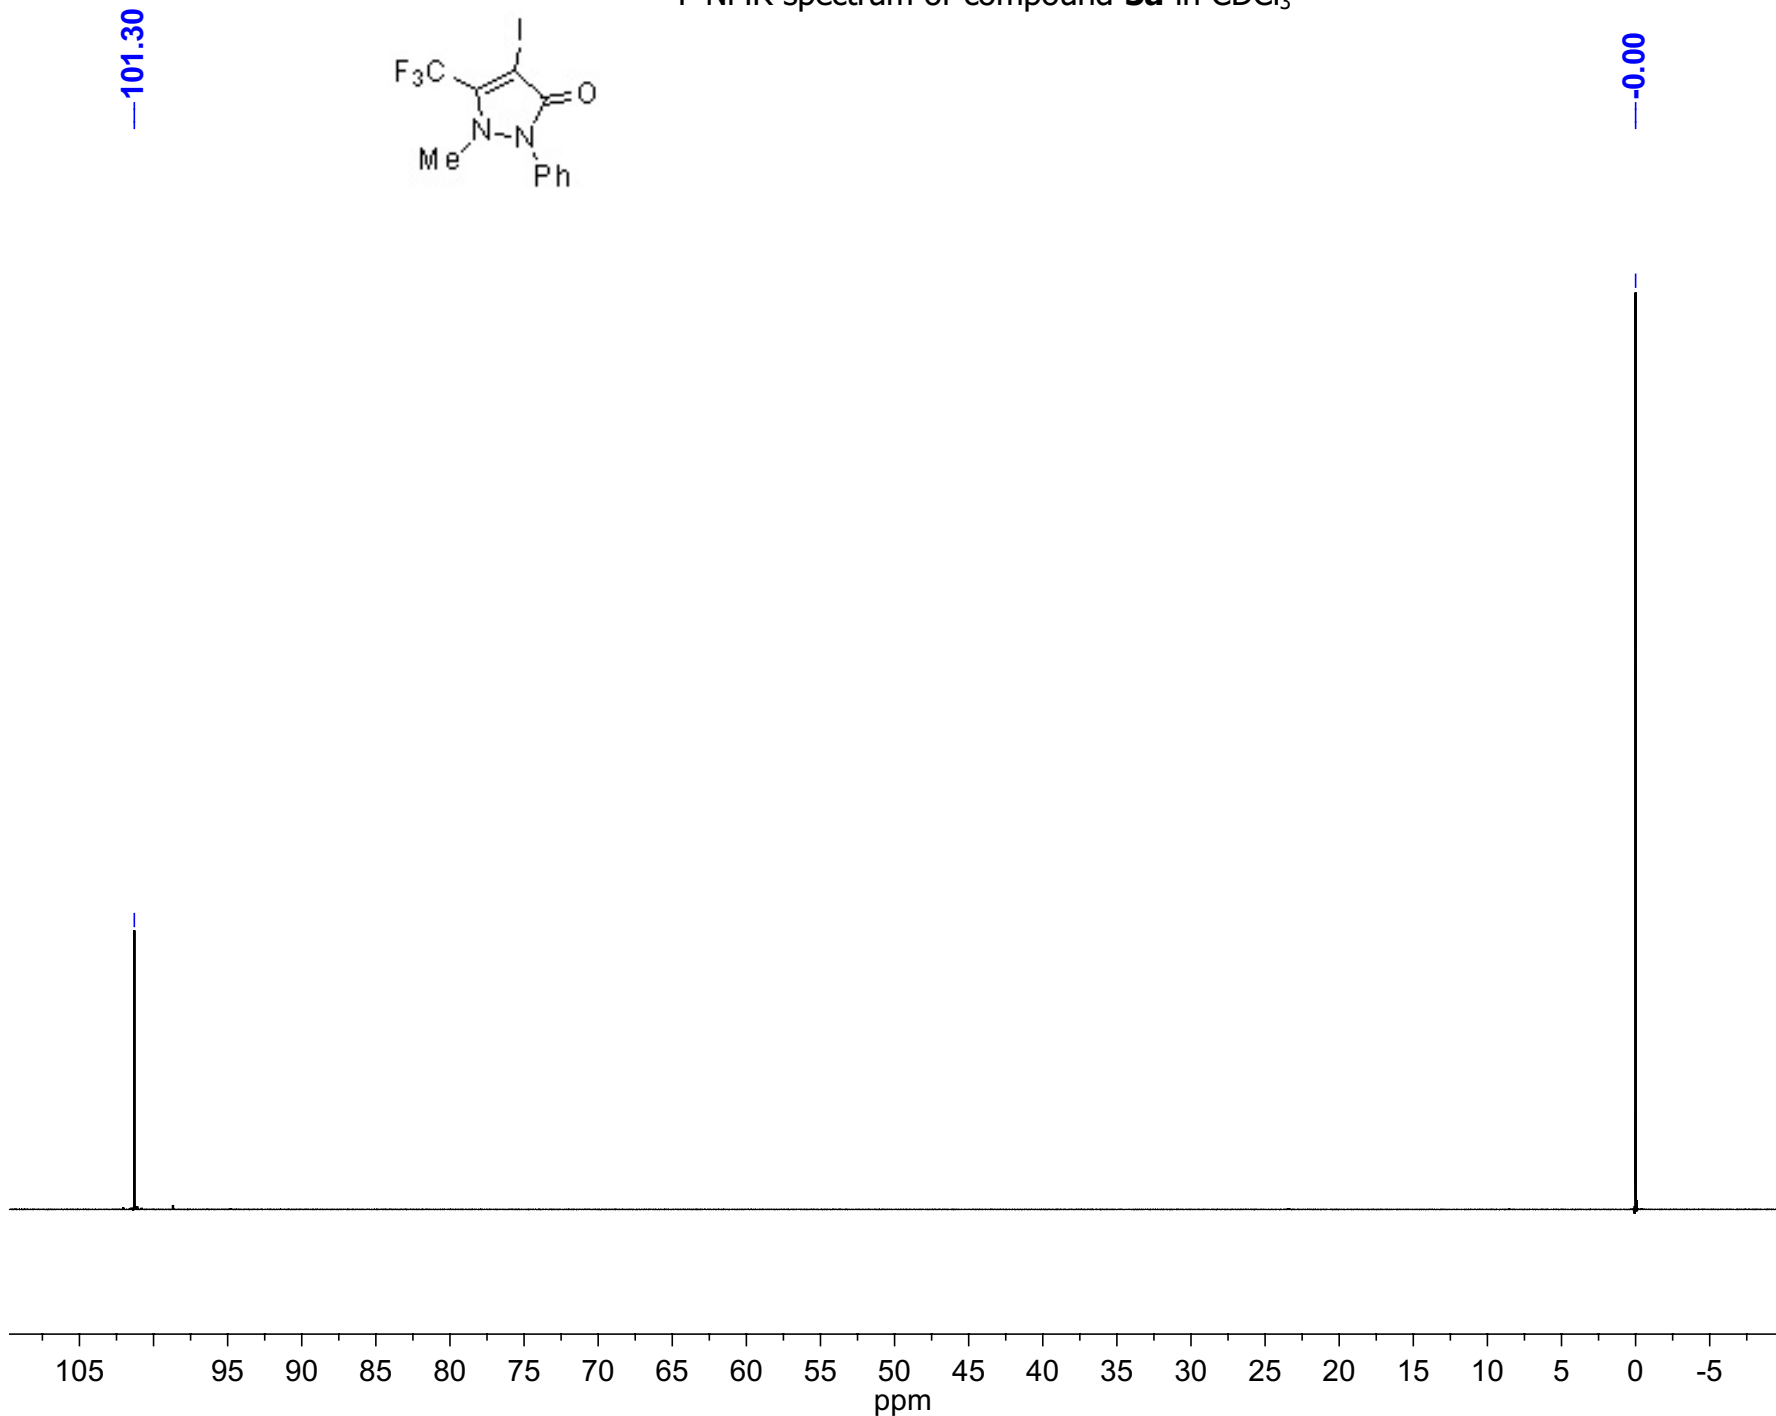

Current Data Parameters

NAME ESh811b  
EXPNO 19  
PROCNO 1  
USER uralhmr

F2 - Acquisition Parameters

Date\_ 20210416  
Time 13.47  
INSTRUM DRX400  
PROBHD 5 mm SEF 19F-1  
PULPROG zg30  
TD 131072  
SOLVENT CDCl3  
NS 16  
DS 2  
SWH 45351.473 Hz  
FIDRES 0.346004 Hz  
AQ 1.4451188 sec  
RG 2048  
DW 11.025 usec  
DE 6.50 usec  
TE 297.2 K  
D1 1.0000000 sec  
MCREST 0.0000000 sec  
MCWRK 0.01500000 sec

==== CHANNEL f1 =====

NUC1 19F  
P1 20.25 usec  
PL1 0.00 dB  
SFO1 376.4561069 MHz

F2 - Processing parameters

SI 131072  
HZpPT 0.346004 Hz  
SF 376.4374880 MHz  
SR 202.99 Hz  
WDW EM  
LB 0.01 Hz  
GB 0  
SSB 0  
PC 4.00

<sup>1</sup>H NMR spectrum of compound **5b** in CDCl<sub>3</sub>

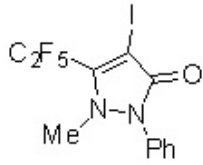

7.53  
7.52  
7.50  
7.42  
7.42  
7.41  
7.41  
7.40  
7.26

7.53  
7.52  
7.50

7.42  
7.42  
7.41  
7.41  
7.40

3.23

1.57

0.00

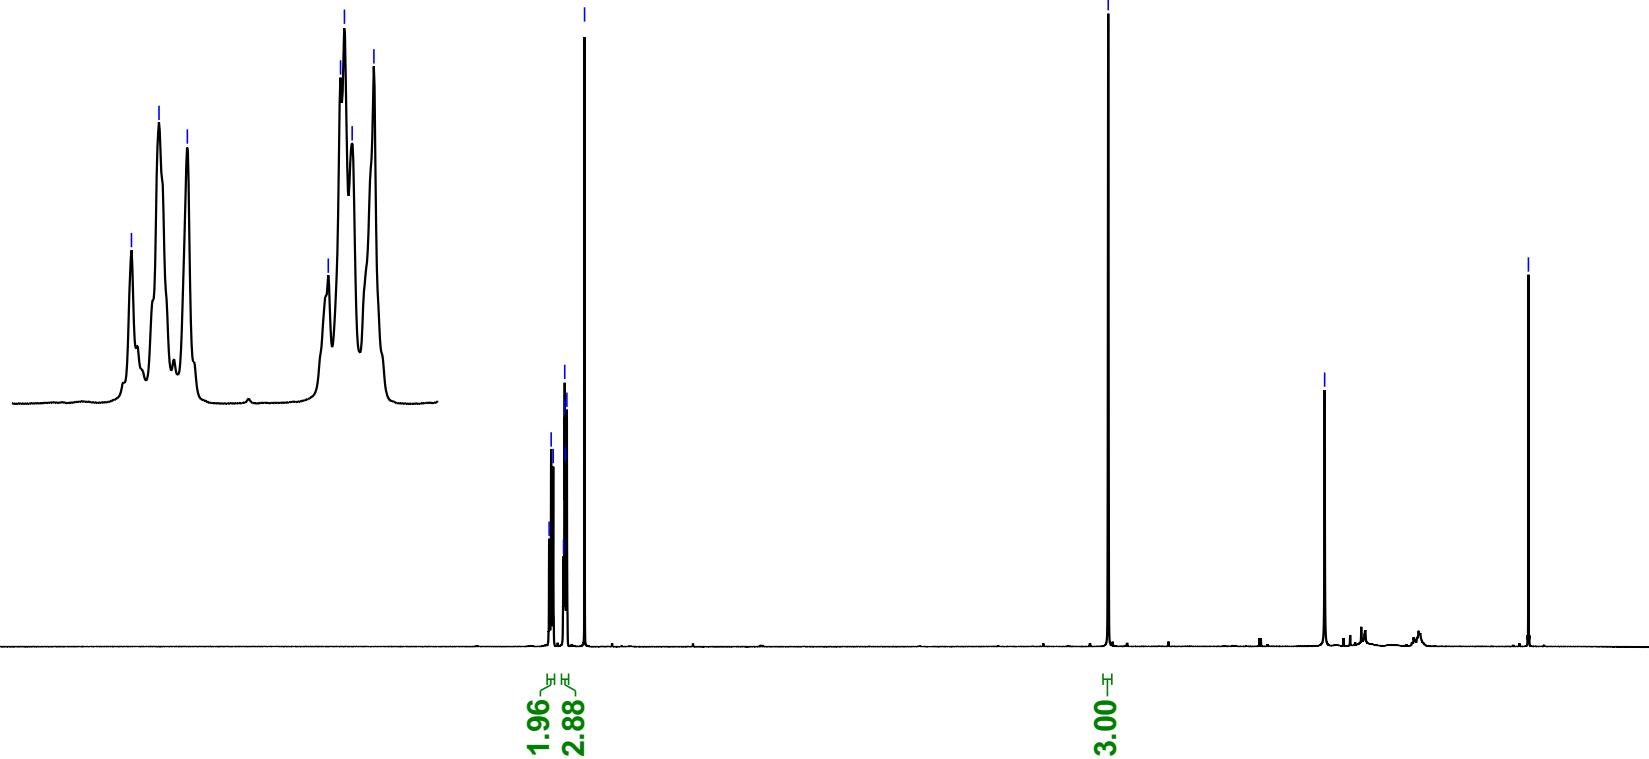

1.96  
2.88

3.00

NAME ESh752  
EXPNO 1  
PROCNO 1  
USER urahmr  
Date\_ 20210408  
Time 15.42  
INSTRUM AV500  
PROBHD 5 mm PABBO BB-  
PULPROG zg30  
SOLVENT CDCl3  
TD 32768  
SW 14.0019 ppm  
O1P 6.000 ppm  
FIDRES 0.213709 Hz  
NS 16  
DS 2  
AQ 2.3396852 sec  
RG 203  
TE 296.4 K  
DE 6.50 usec  
D1 1.00000000 sec  
TD0 1

==== CHANNEL f1 =====  
NUC1 1H  
P1 12.00 usec  
PL1 0.30 dB  
PL1W 18.91792679 W  
SFO1 500.1330008 MHz  
SI 32768  
HZpPT 0.213709 Hz  
SR 12.73 Hz  
WDW EM  
LB 0.00 Hz  
GB 0  
SSB 0

12 11 10 9 8 7 6 5 4 3 2 1 0 -1

ppm 38

<sup>13</sup>C NMR spectrum of compound **5b** in CDCl<sub>3</sub>

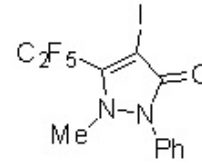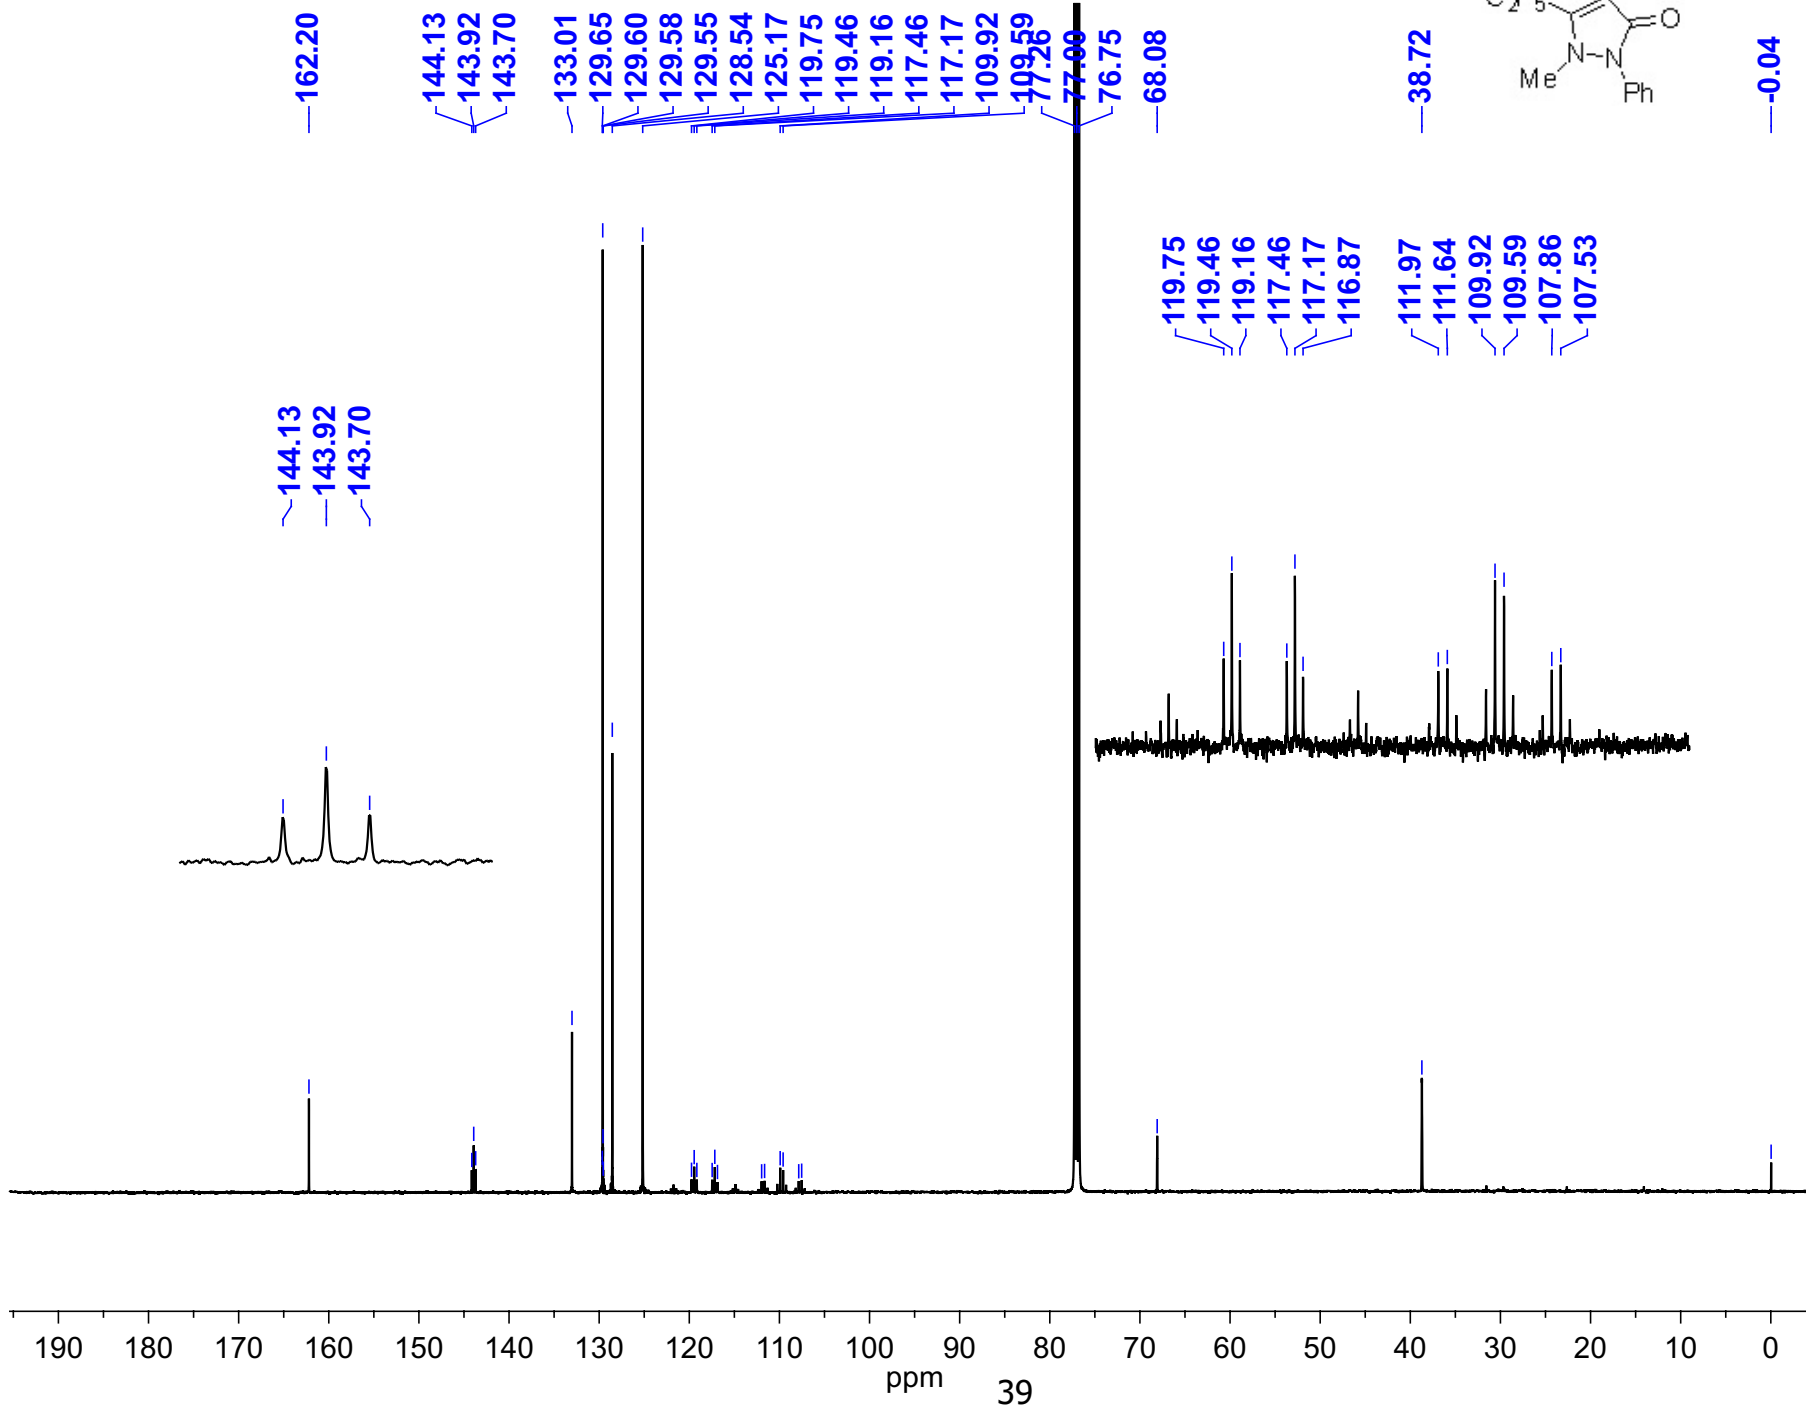

|         |                |
|---------|----------------|
| NAME    | ESh752         |
| EXPNO   | 13             |
| PROCNO  | 1              |
| USER    | uralnmr        |
| Date_   | 20201105       |
| Time    | 18.12          |
| INSTRUM | AV500          |
| PROBHD  | 5 mm PABBO BB- |
| PULPROG | zgpg30         |
| SOLVENT | CDCl3          |
| TD      | 32768          |
| SW      | 200.7838 ppm   |
| O1P     | 95.000 ppm     |
| FIDRES  | 0.770646 Hz    |
| NS      | 32768          |
| DS      | 8              |
| AQ      | 0.6488564 sec  |
| RG      | 203            |
| TE      | 296.9 K        |
| DE      | 6.50 usec      |
| D1      | 1.00000000 sec |
| D11     | 0.03000000 sec |
| TD0     | 32             |

==== CHANNEL f1 =====

|      |                 |
|------|-----------------|
| NUC1 | 13C             |
| P1   | 9.00 usec       |
| PL1  | 0.00 dB         |
| PL1W | 115.29558563 W  |
| SFO1 | 125.7697360 MHz |

==== CHANNEL f2 =====

|         |                 |
|---------|-----------------|
| CPDPRG2 | waltz16         |
| NUC2    | 1H              |
| PCPD2   | 75.00 usec      |
| PL2     | 120.00 dB       |
| PL12    | 17.00 dB        |
| PL13    | 20.00 dB        |
| PL2W    | 0.00000000 W    |
| PL12W   | 0.40445811 W    |
| PL13W   | 0.20270923 W    |
| SFO2    | 500.1320005 MHz |
| SI      | 32768           |
| HZpPT   | 0.770646 Hz     |
| SR      | 1.28 Hz         |
| WDW     | EM              |
| LB      | 1.00 Hz         |
| GB      | 0               |
| SSB     | 0               |

<sup>19</sup>F NMR spectrum of compound **5b** in CDCl<sub>3</sub>

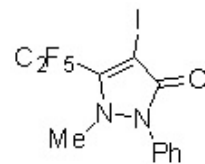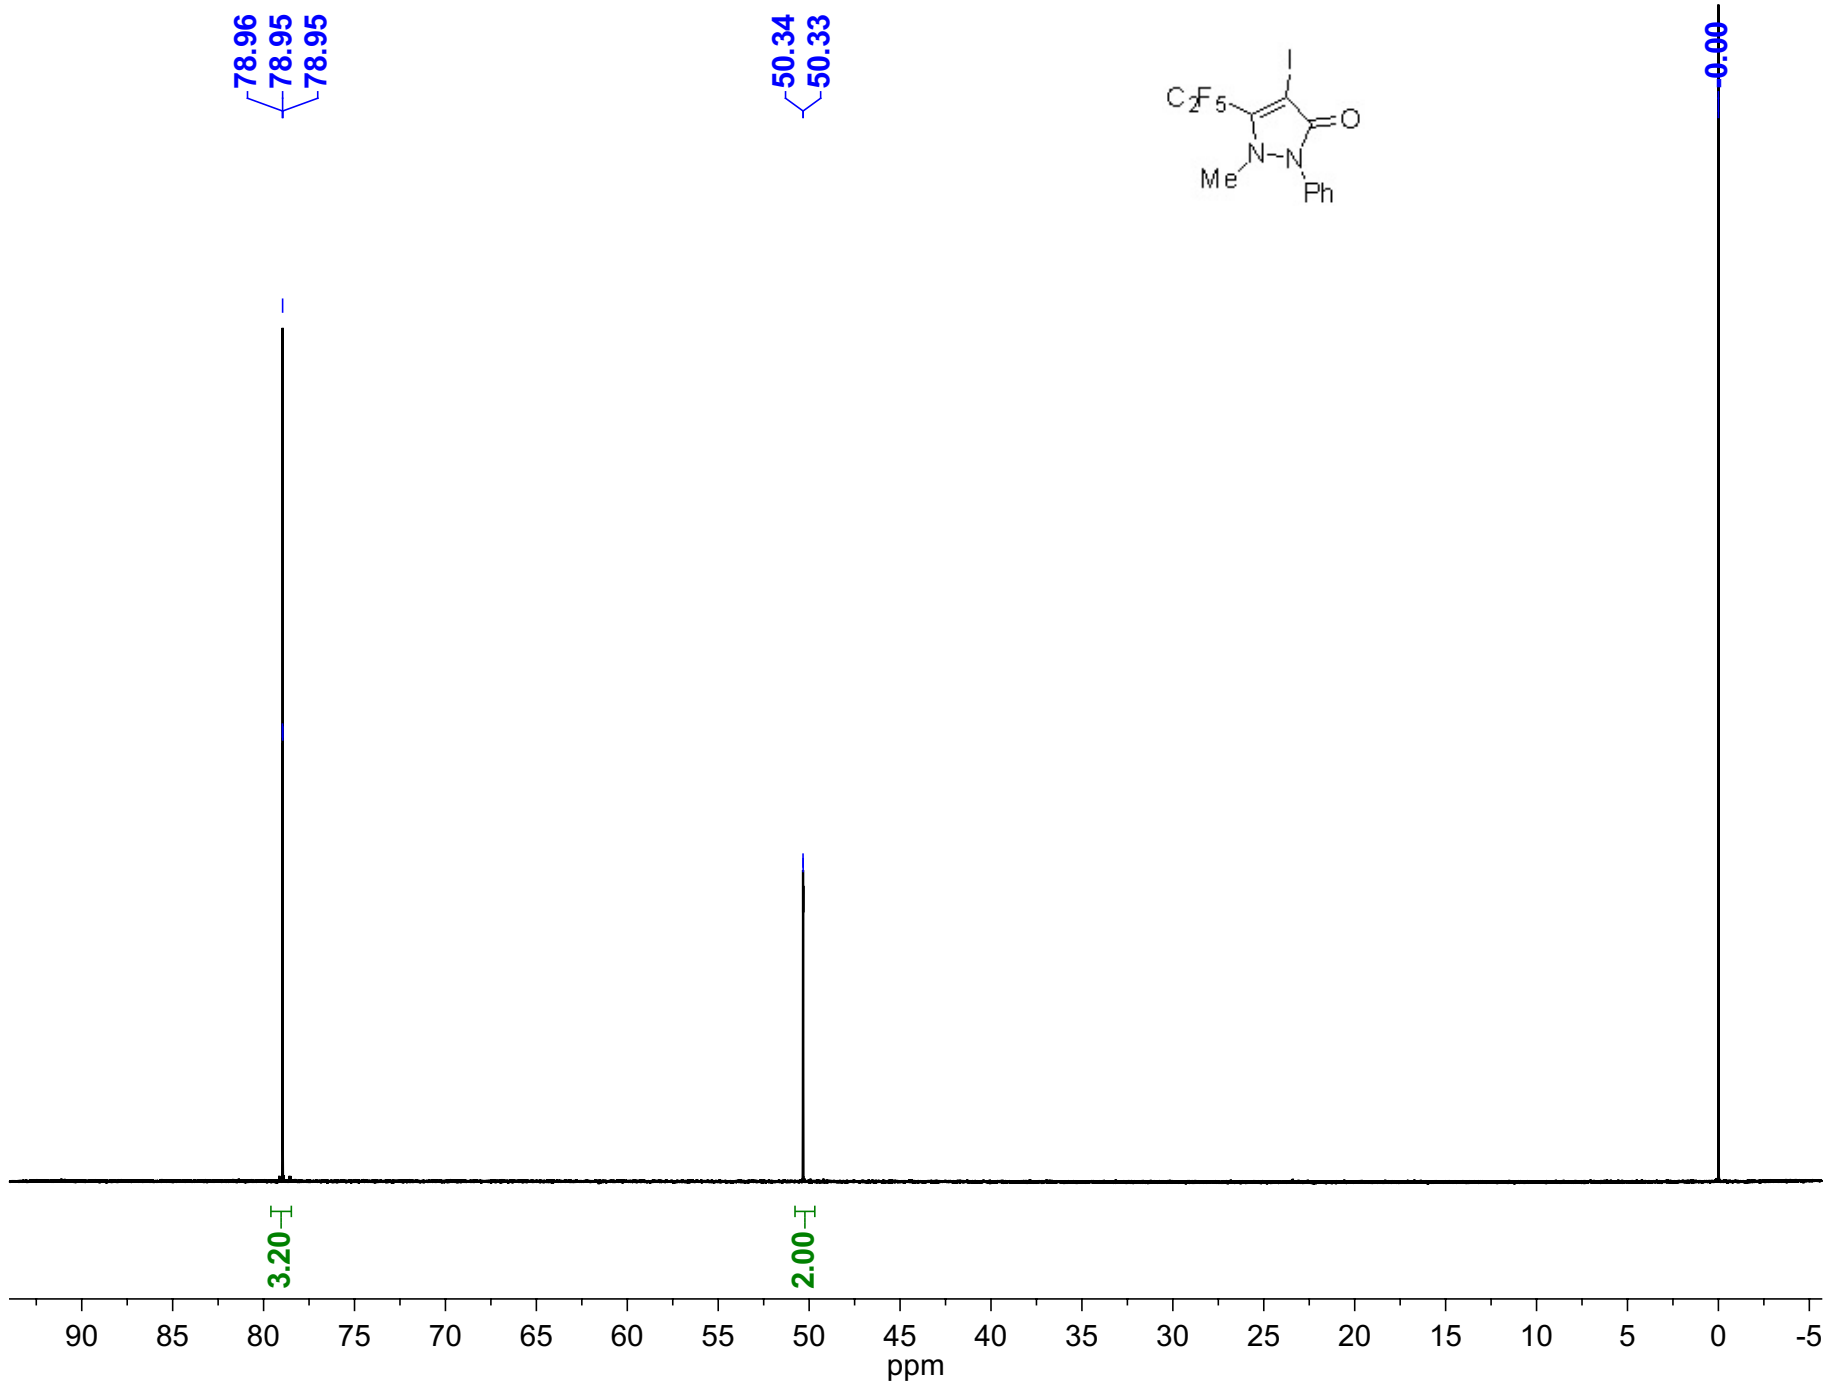

NAME ESh752  
EXPNO 19  
PROCNO 1  
USER urahmr  
Date\_ 20210408  
Time 15.46  
INSTRUM AV500  
PROBHD 5 mm PABBO BB-  
PULPROG zg30  
SOLVENT CDCl3  
TD 131072  
SW 99.6202 ppm  
O1P 45.000 ppm  
FIDRES 0.357628 Hz  
NS 16  
DS 2  
AQ 1.3981513 sec  
RG 203  
TE 296.4 K  
DE 6.50 usec  
D1 1.00000000 sec  
TD0 1

==== CHANNEL f1 ====  
NUC1 19F  
P1 15.50 usec  
PL1 -5.00 dB  
PL1W 46.07103729 W  
SFO1 470.5370532 MHz  
SI 131072  
HZpPT 0.357628 Hz  
SR 403.23 Hz  
WDW EM  
LB 0.00 Hz  
GB 0  
SSB 0



<sup>1</sup>H NMR spectrum of compound **3a** in CDCl<sub>3</sub>

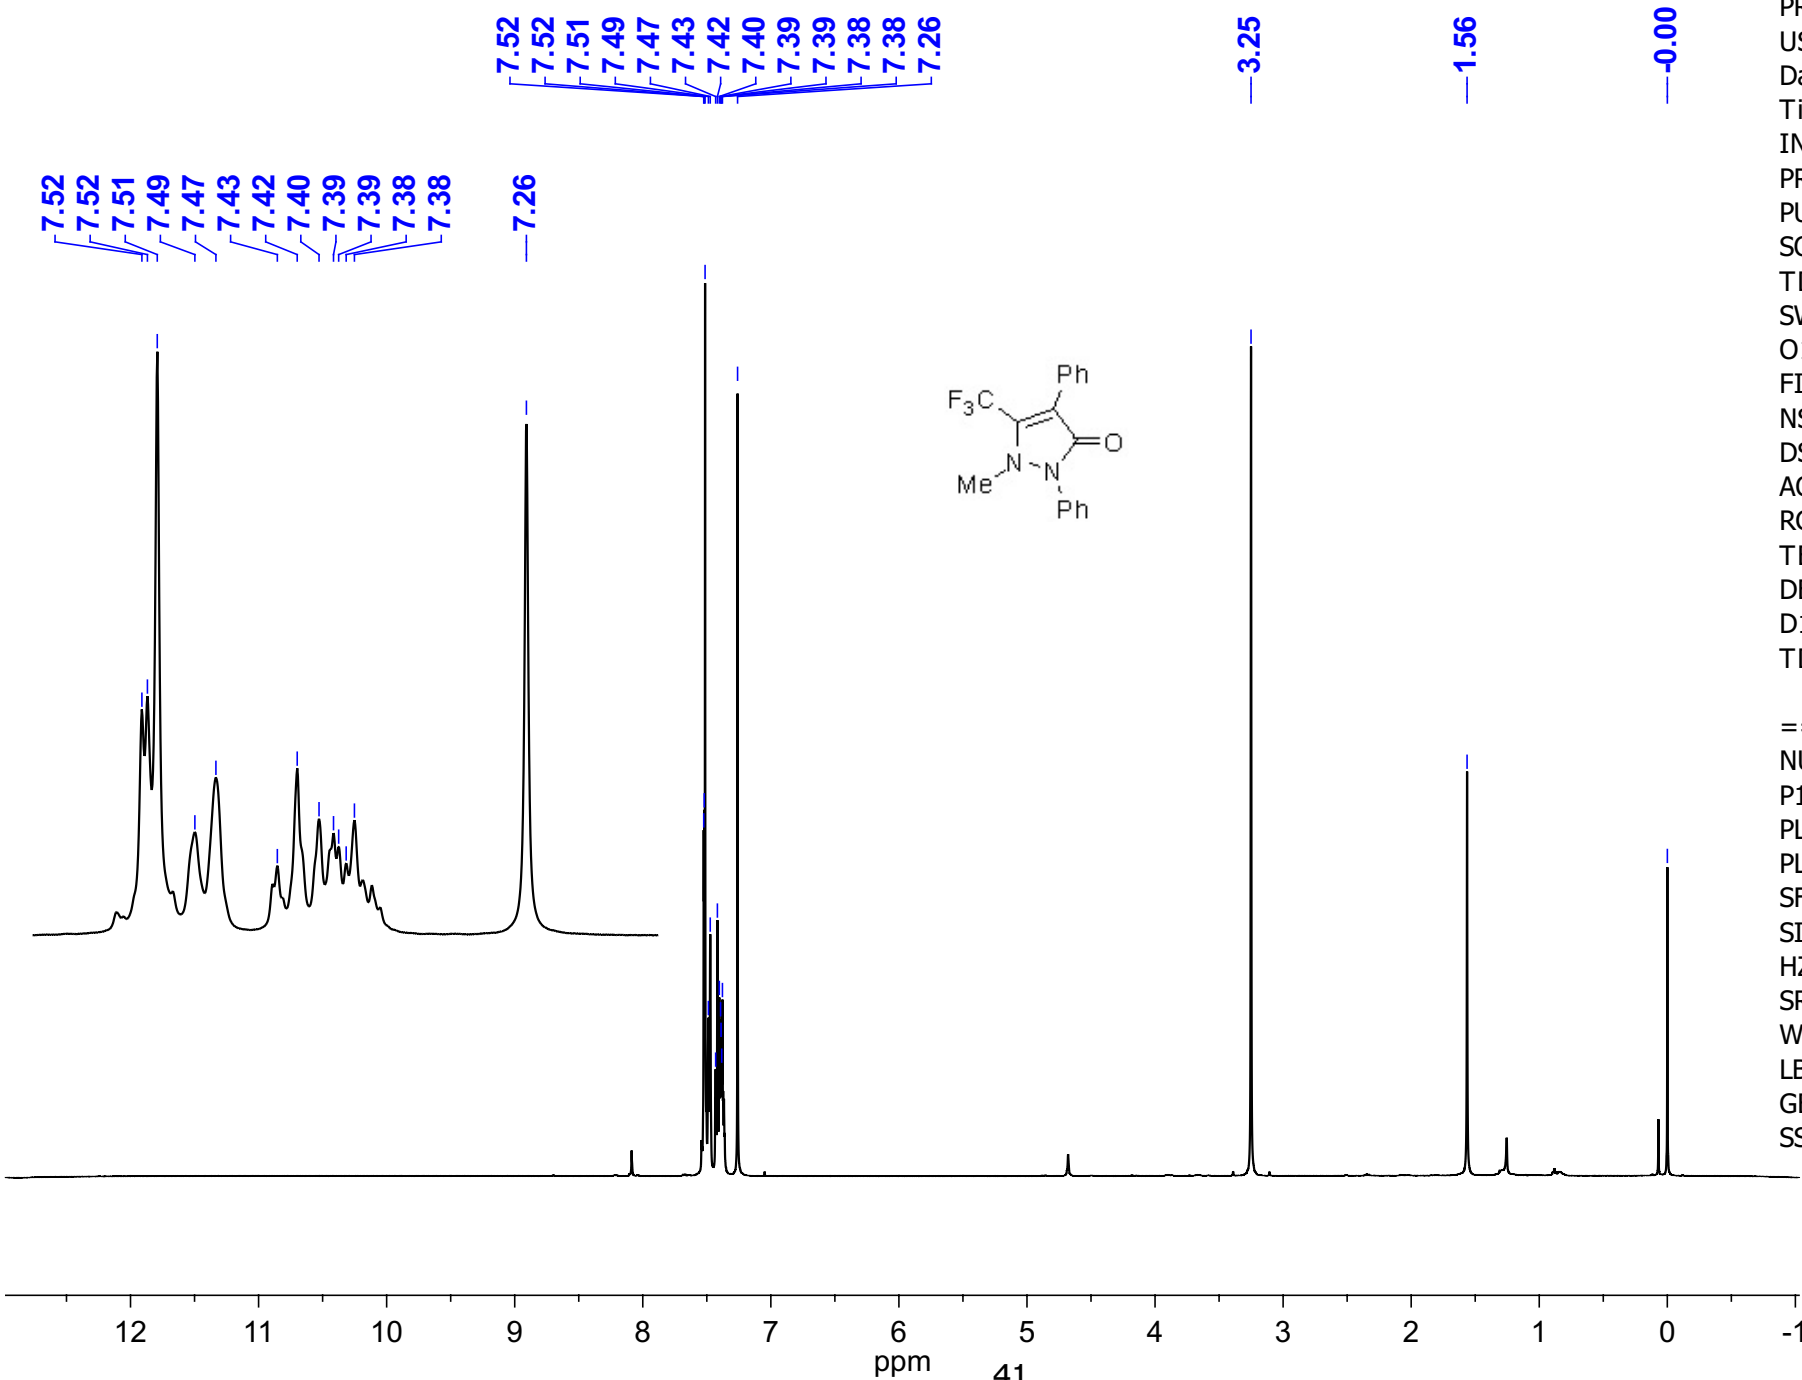

NAME ESh695  
EXPNO 1  
PROCNO 1  
USER uralnmr  
Date\_ 20190725  
Time 13.25  
INSTRUM AV500  
PROBHD 5 mm PABBO BB-  
PULPROG zg30  
SOLVENT CDCl3  
TD 32768  
SW 14.0019 ppm  
O1P 6.000 ppm  
FIDRES 0.213709 Hz  
NS 16  
DS 2  
AQ 2.3396852 sec  
RG 181  
TE 295.8 K  
DE 6.50 usec  
D1 1.00000000 sec  
TD0 1

==== CHANNEL f1 =====  
NUC1 1H  
P1 12.00 usec  
PL1 0.30 dB  
PL1W 18.91792679 W  
SFO1 500.1330008 MHz  
SI 32768  
HZpPT 0.213709 Hz  
SR 13.62 Hz  
WDW EM  
LB 0.00 Hz  
GB 0  
SSB 0

<sup>13</sup>C NMR spectrum of compound **3a** in CDCl<sub>3</sub>

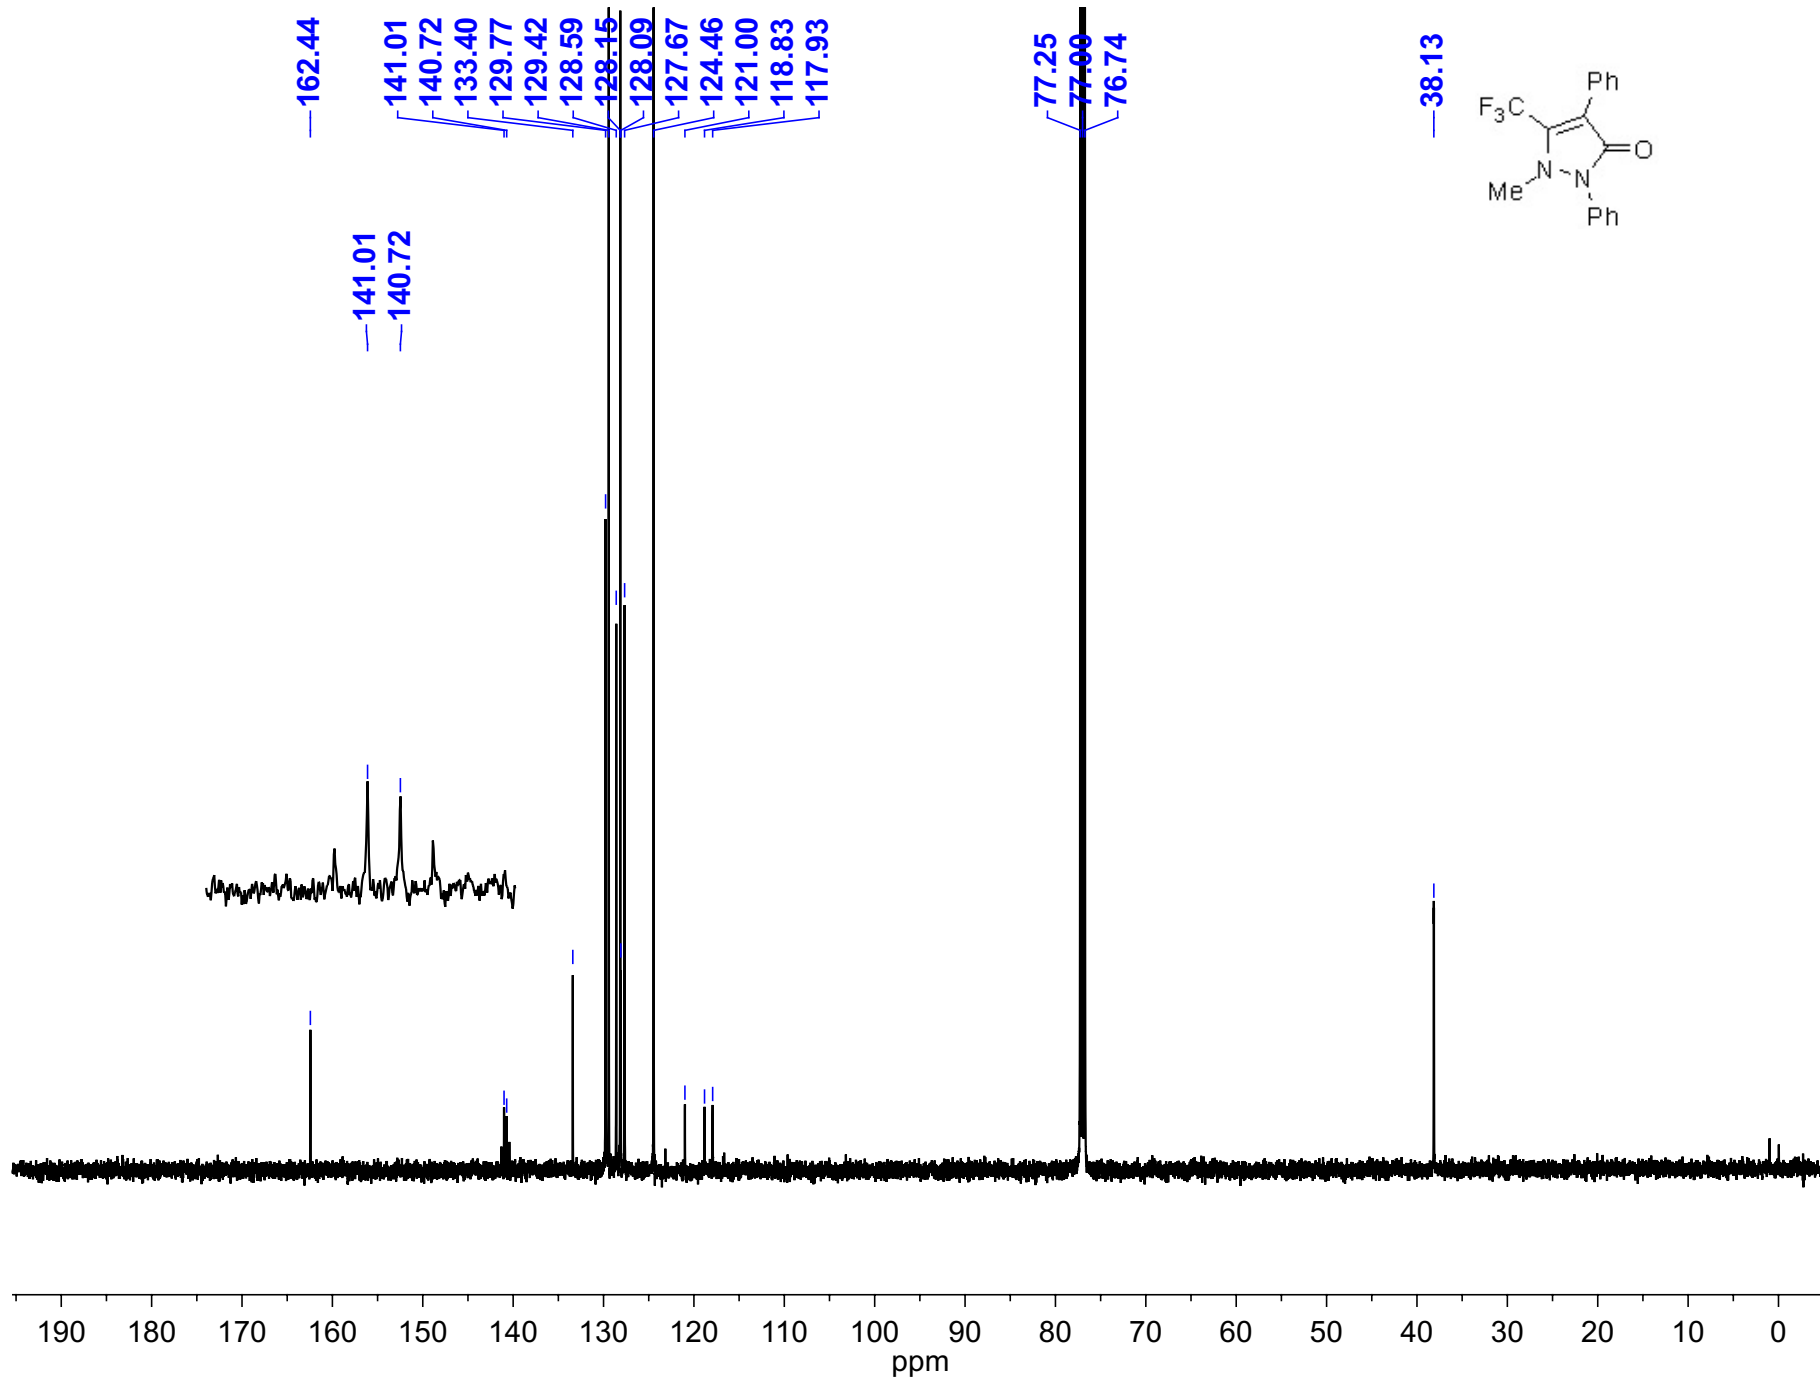

|                        |                 |
|------------------------|-----------------|
| NAME                   | ESh695          |
| EXPNO                  | 13              |
| PROCNO                 | 1               |
| USER                   | uralnmr         |
| Date_                  | 20190731        |
| Time                   | 10.39           |
| INSTRUM                | AV500           |
| PROBHD                 | 5 mm PABBO BB-  |
| PULPROG                | zgpg30          |
| SOLVENT                | CDCl3           |
| TD                     | 32768           |
| SW                     | 200.7838 ppm    |
| O1P                    | 95.000 ppm      |
| FIDRES                 | 0.770646 Hz     |
| NS                     | 1024            |
| DS                     | 8               |
| AQ                     | 0.6488564 sec   |
| RG                     | 203             |
| TE                     | 297.3 K         |
| DE                     | 6.50 usec       |
| D1                     | 1.00000000 sec  |
| D11                    | 0.03000000 sec  |
| TD0                    | 1               |
| ===== CHANNEL f1 ===== |                 |
| NUC1                   | 13C             |
| P1                     | 10.00 usec      |
| PL1                    | 0.00 dB         |
| PL1W                   | 115.29558563 W  |
| SFO1                   | 125.7697360 MHz |
| ===== CHANNEL f2 ===== |                 |
| CPDPRG2                | waltz16         |
| NUC2                   | 1H              |
| PCPD2                  | 75.00 usec      |
| PL2                    | 0.30 dB         |
| PL12                   | 16.30 dB        |
| PL13                   | 19.30 dB        |
| PL2W                   | 18.91792679 W   |
| PL12W                  | 0.47519693 W    |
| PL13W                  | 0.23816262 W    |
| SFO2                   | 500.1320005 MHz |
| SI                     | 65536           |
| HZpPT                  | 0.385323 Hz     |
| SR                     | 5.26 Hz         |
| WDW                    | EM              |
| LB                     | 1.00 Hz         |
| GB                     | 0               |
| SSB                    | 0               |

<sup>19</sup>F NMR spectrum of compound **3a** in CDCl<sub>3</sub>

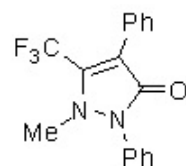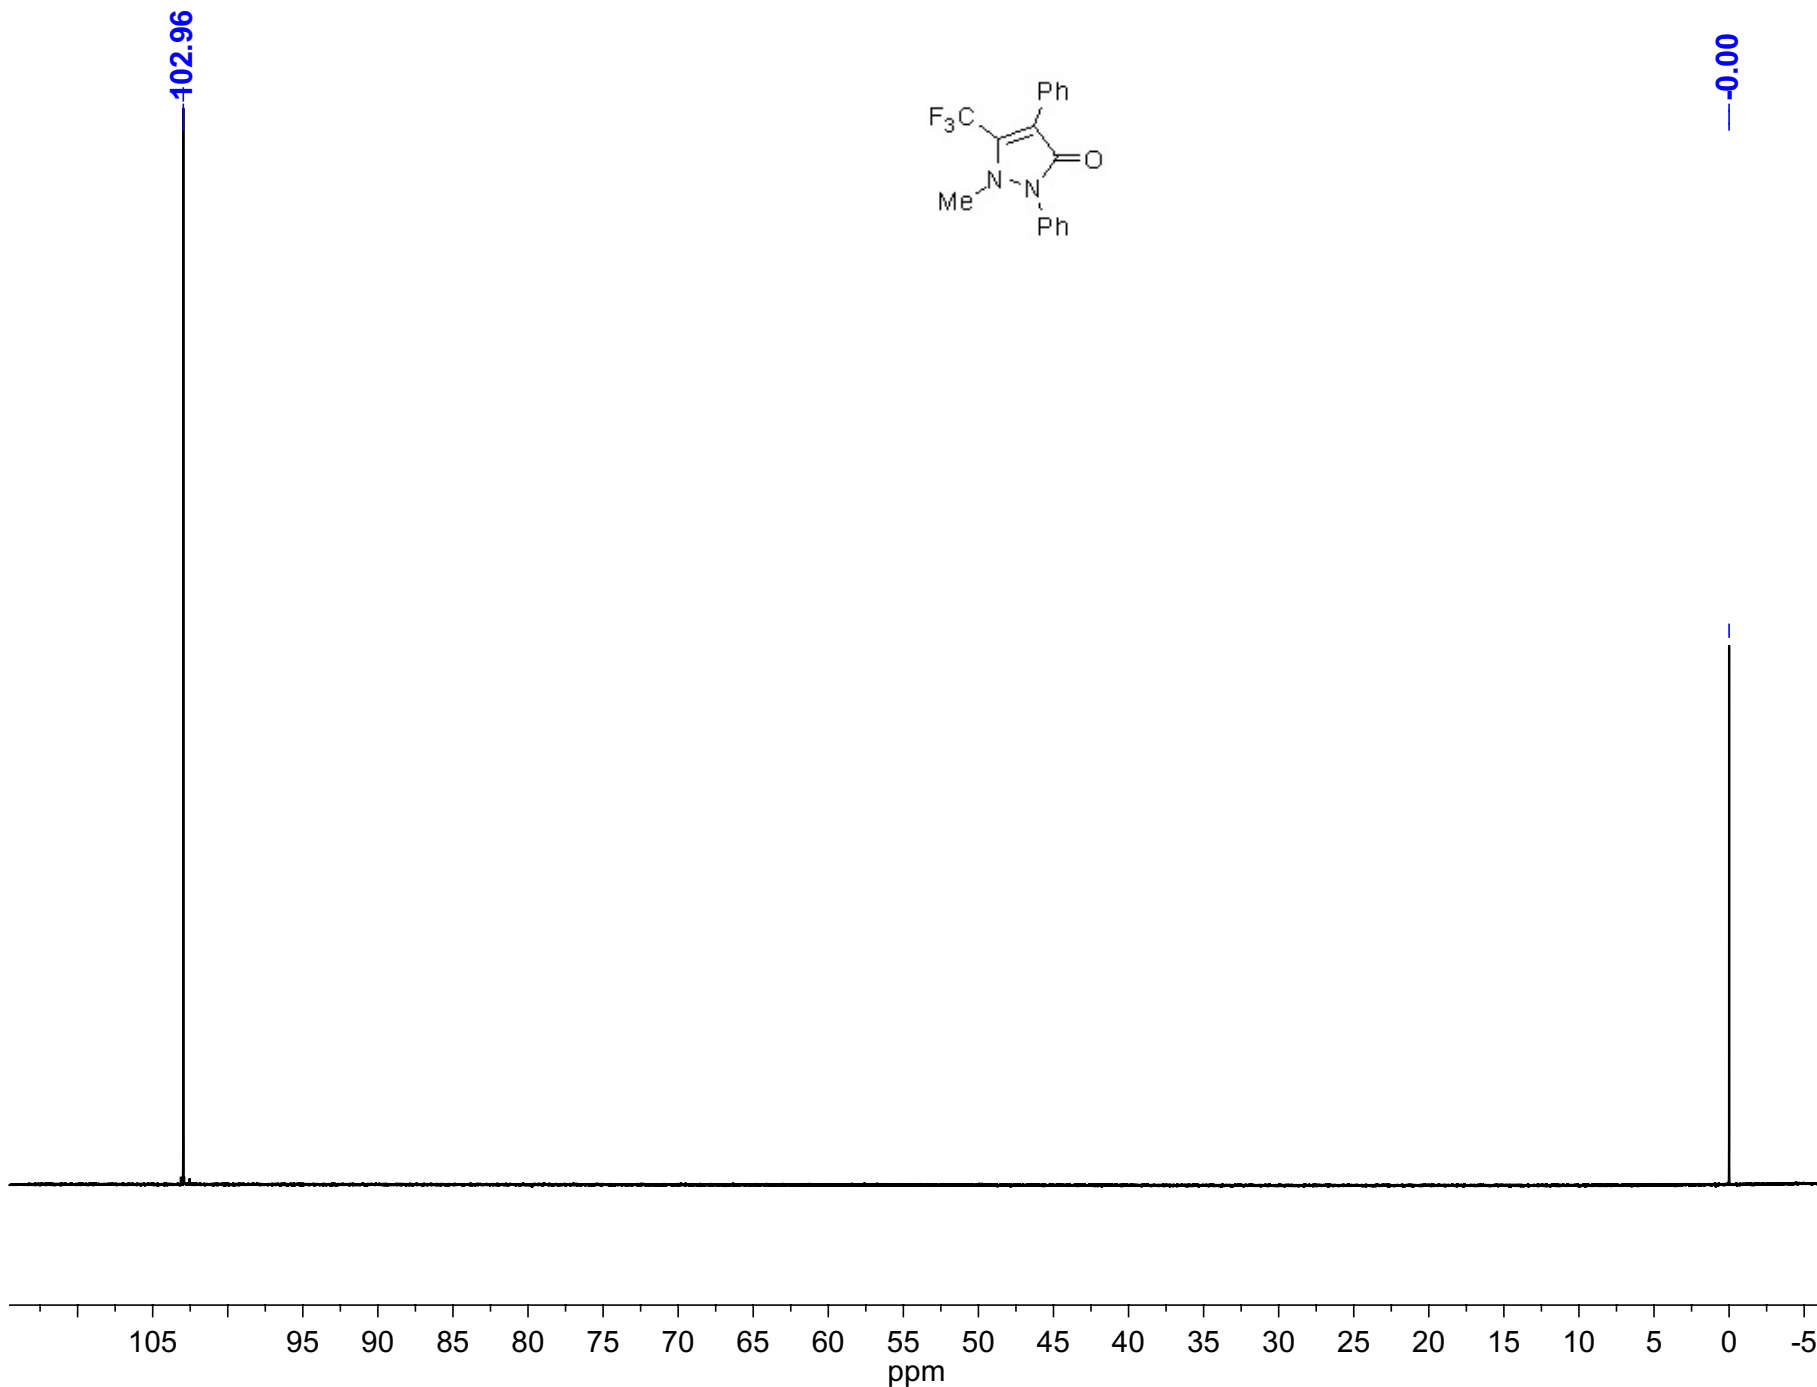

```
NAME      ESh695
EXPNO     19
PROCNO    1
USER      urahmr
Date_     20190725
Time      13.32
INSTRUM   AV500
PROBHD    5 mm PABBO BB-
PULPROG   zg30
SOLVENT   CDCl3
TD         131072
SW         120.7506 ppm
O1P       55.000 ppm
FIDRES    0.433488 Hz
NS         16
DS         2
AQ         1.1534836 sec
RG         203
TE         295.8 K
DE         6.50 usec
D1         1.00000000 sec
TD0        1
===== CHANNEL f1 =====
NUC1      19F
P1         15.50 usec
PL1        -5.00 dB
PL1W       46.07103729 W
SFO1       470.5417584 MHz
SI         131072
HZpPT     0.433488 Hz
SR         405.65 Hz
WDW        EM
LB         0.00 Hz
GB         0
SSB        0
```

<sup>1</sup>H NMR spectrum of compound **3c** in CDCl<sub>3</sub>

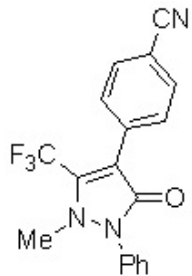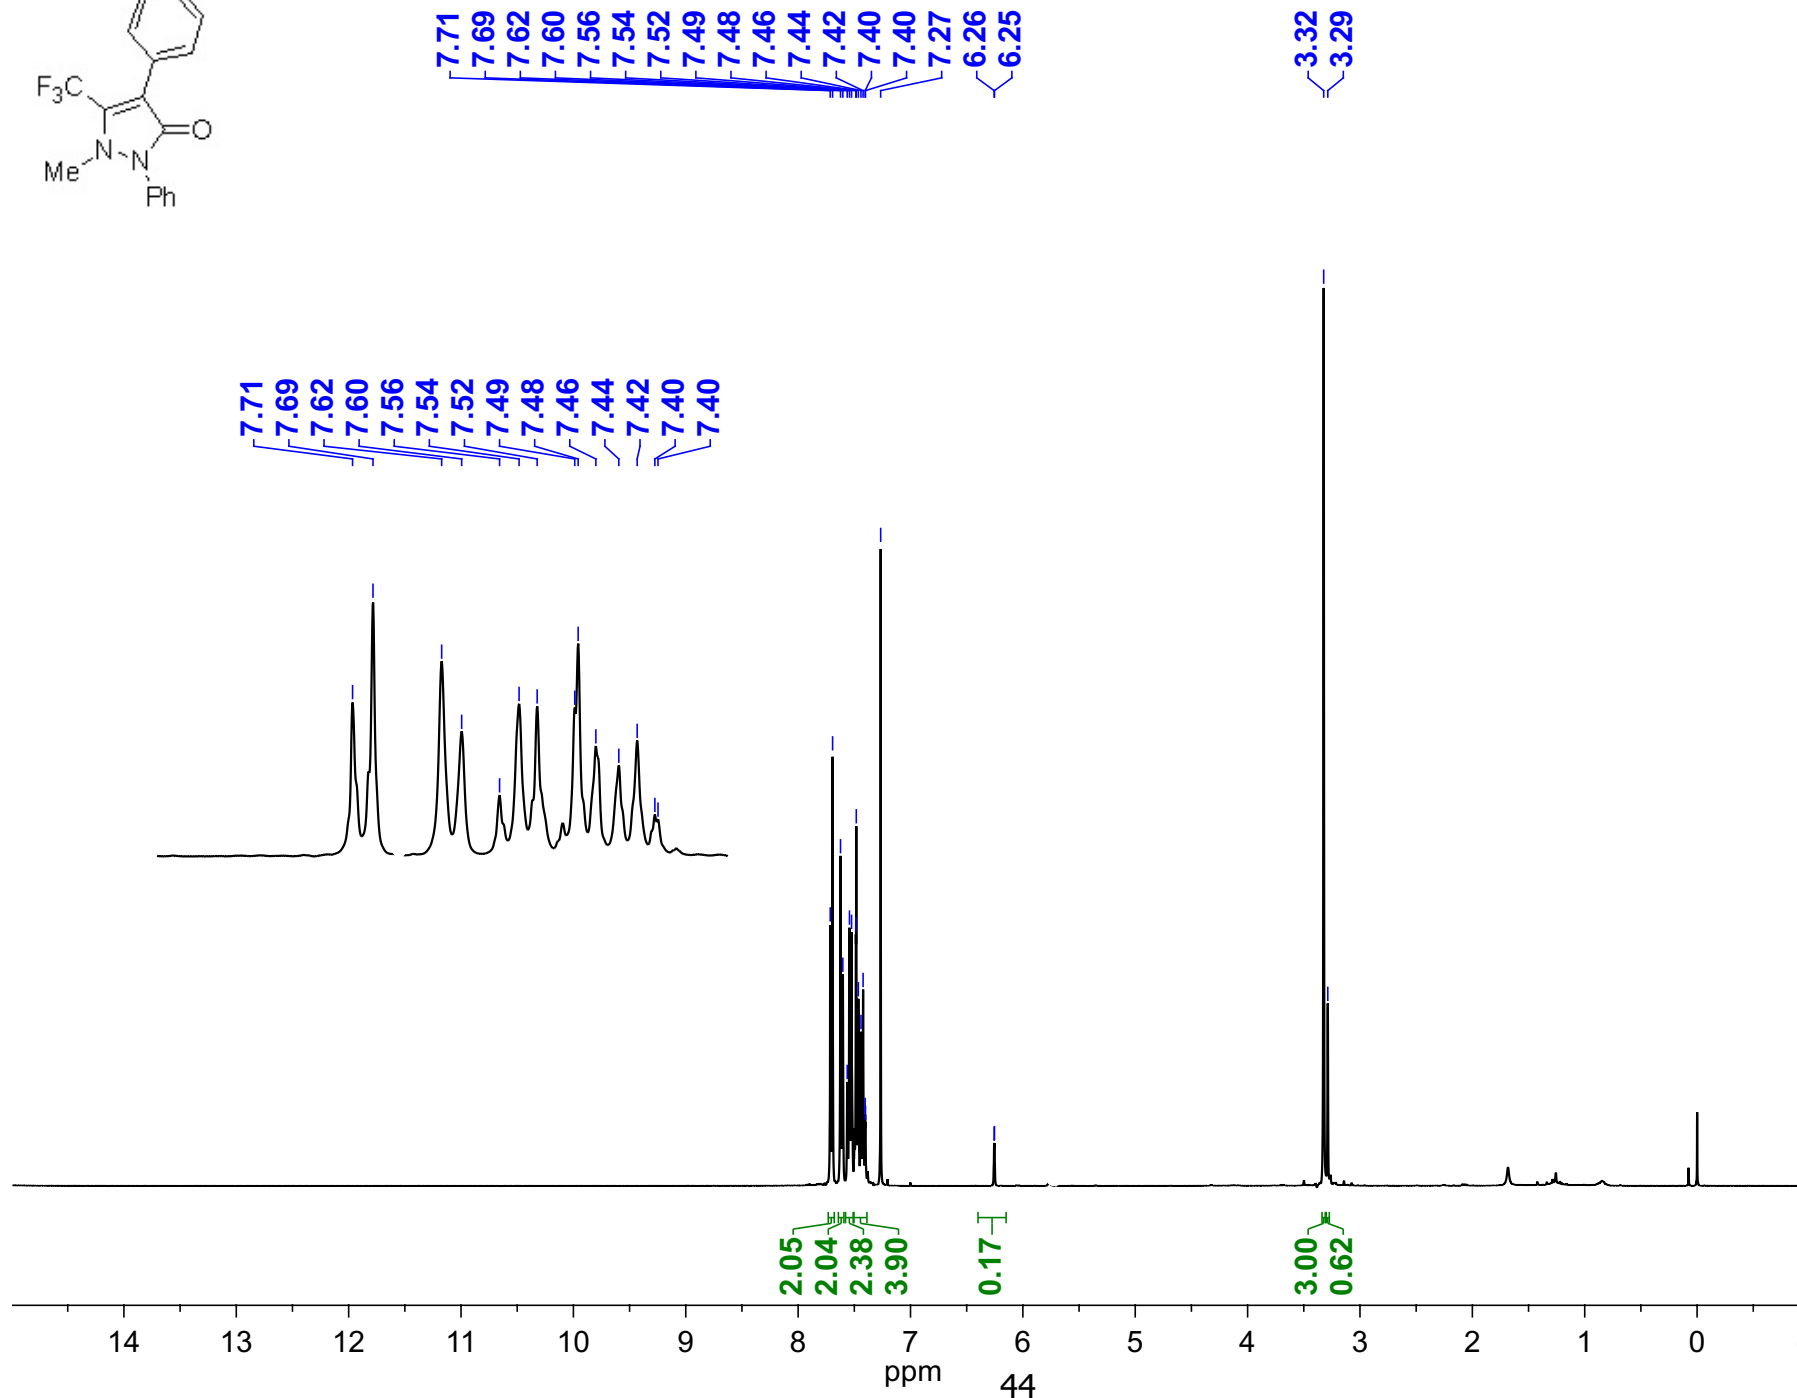

Current Data Parameters  
NAME ESh788c  
EXPNO 1  
PROCNO 1  
USER uralnrmr

F2 - Acquisition Parameters  
Date\_ 20210421  
Time 14.57  
INSTRUM DRX400  
PROBHD 5 mm SEF 19F-1  
PULPROG zg30  
TD 32768  
SOLVENT CDCl<sub>3</sub>  
NS 16  
DS 2  
SWH 6410.256 Hz  
FIDRES 0.195625 Hz  
AQ 2.5559540 sec  
RG 228.1  
DW 78.000 usec  
DE 16.00 usec  
TE 297.2 K  
D1 1.00000000 sec  
MCREST 0.00000000 sec  
MCWRK 0.01500000 sec

==== CHANNEL f1 ====  
NUC1 1H  
P1 32.50 usec  
PL1 -4.00 dB  
SFO1 400.1328009 MHz

F2 - Processing parameters  
SI 32768  
HZpPT 0.195625 Hz  
SF 400.1300086 MHz  
SR 8.58 Hz  
WDW EM  
LB 0.00 Hz  
GB 0  
SSB 0  
PC 3.00

<sup>19</sup>F NMR spectrum of compound **3c** in CDCl<sub>3</sub>

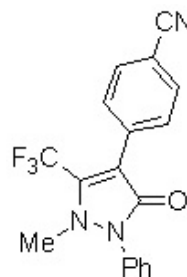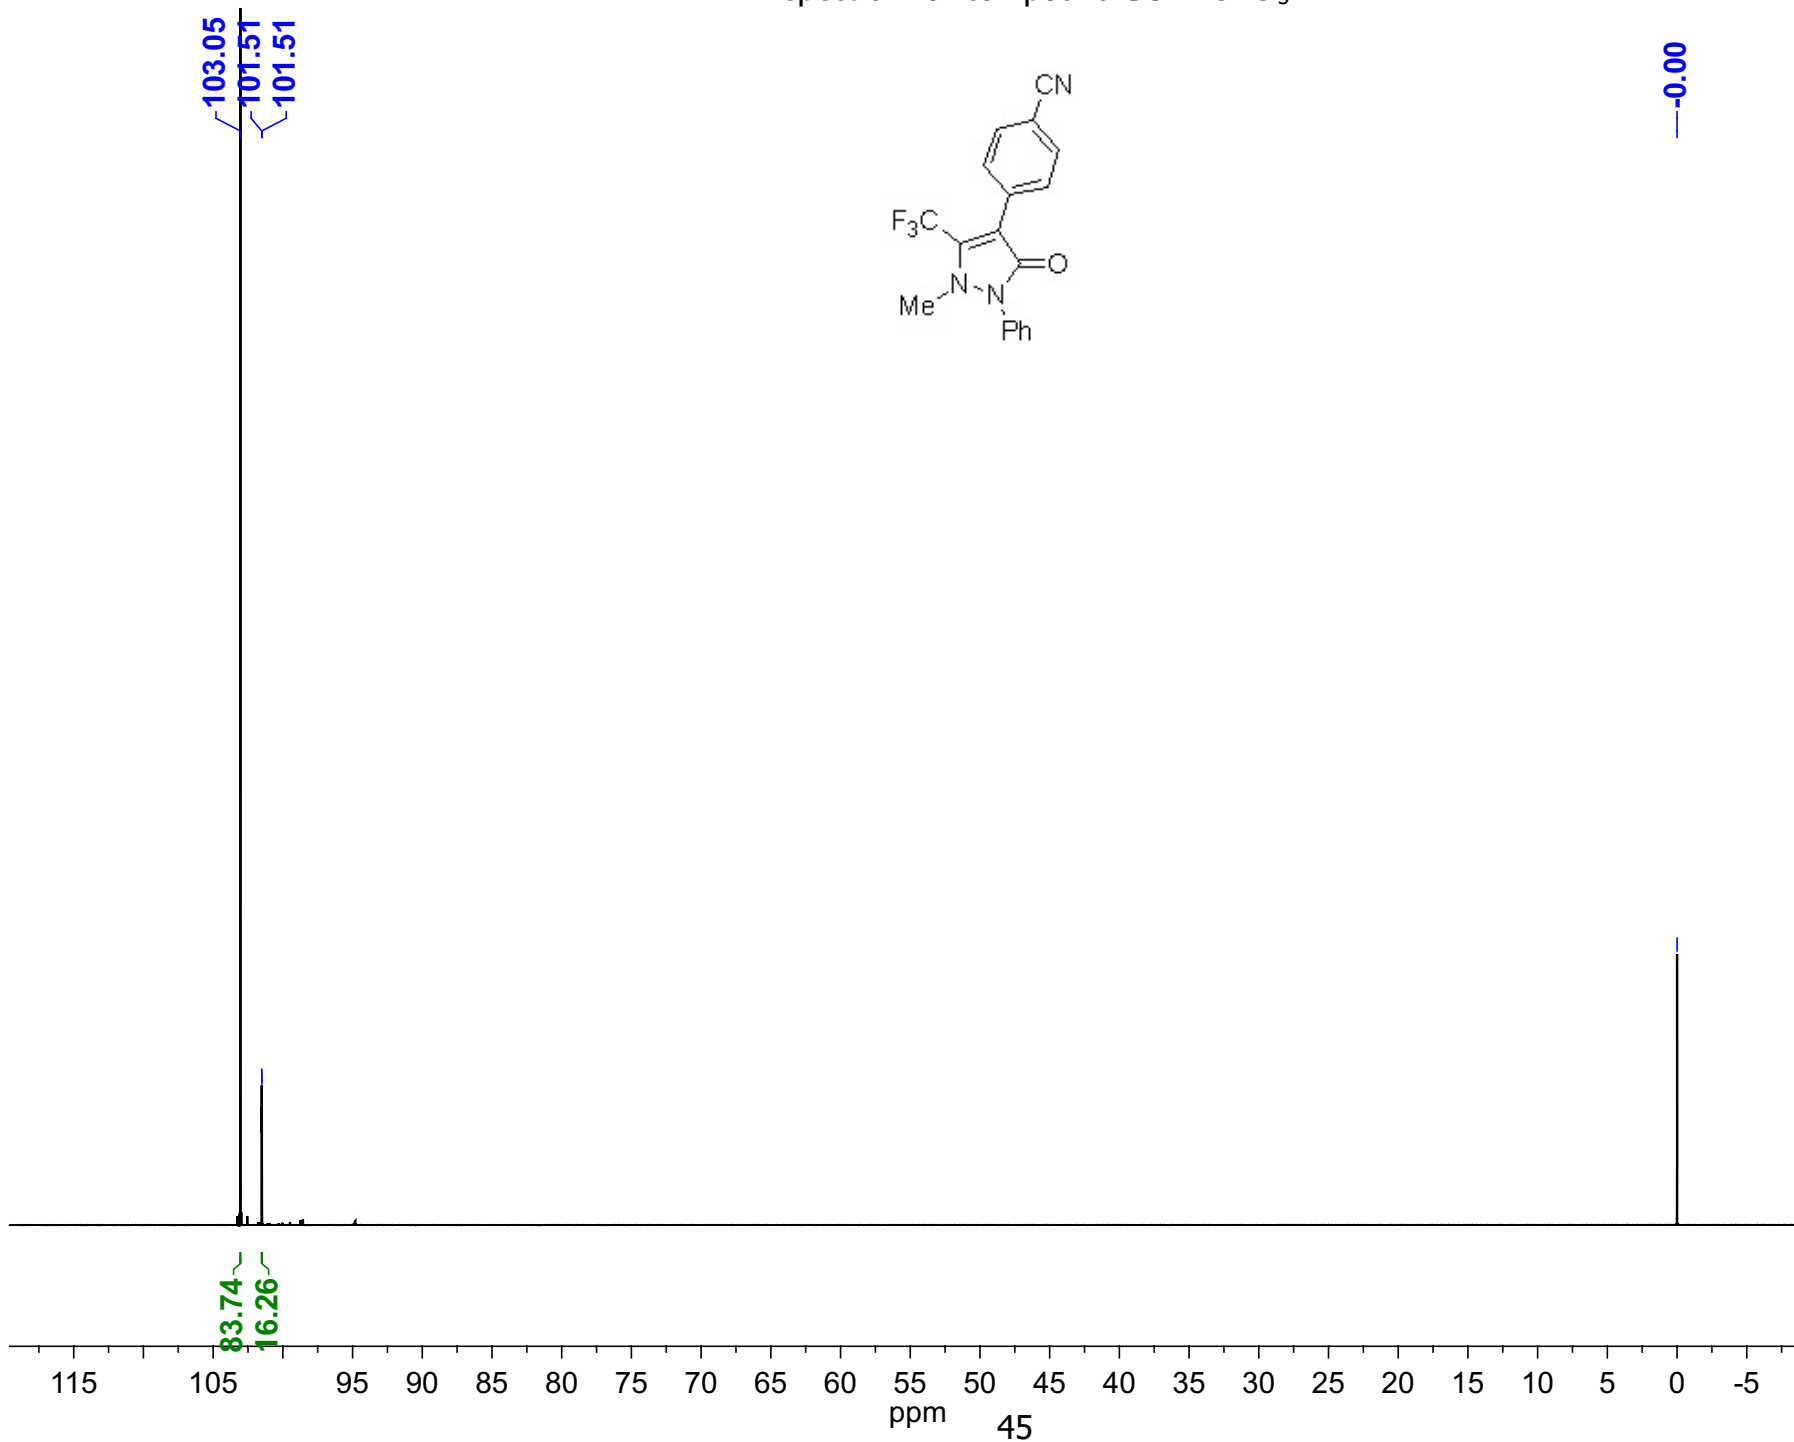

Current Data Parameters  
NAME ESh788c  
EXPNO 19  
PROCNO 1  
USER urahmr

F2 - Acquisition Parameters  
Date\_ 20210421  
Time 15.04  
INSTRUM DRX400  
PROBHD 5 mm SEF 19F-1  
PULPROG zg30  
TD 262144  
SOLVENT CDCl3  
NS 16  
DS 2  
SWH 49019.609 Hz  
FIDRES 0.186995 Hz  
AQ 2.6739187 sec  
RG 724.1  
DW 10.200 usec  
DE 6.50 usec  
TE 297.2 K  
D1 1.00000000 sec  
MCREST 0.00000000 sec  
MCWRK 0.01500000 sec

==== CHANNEL f1 =====  
NUC1 19F  
P1 20.25 usec  
PL1 0.00 dB  
SFO1 376.4579891 MHz

F2 - Processing parameters  
SI 262144  
HZpPT 0.186995 Hz  
SF 376.4374830 MHz  
SR 198.00 Hz  
WDW EM  
LB 0.00 Hz  
GB 0  
SSB 0  
PC 4.00

<sup>1</sup>H NMR spectrum of compound **3d** in CDCl<sub>3</sub>

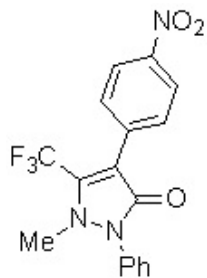

8.29  
8.27  
7.69  
7.68  
7.57  
7.55  
7.54  
7.49  
7.47  
7.45  
7.44  
7.42  
7.26

8.29  
8.27  
7.69  
7.68  
7.57  
7.55  
7.54  
7.49  
7.47  
7.45  
7.44  
7.42

3.35  
1.59  
0.00

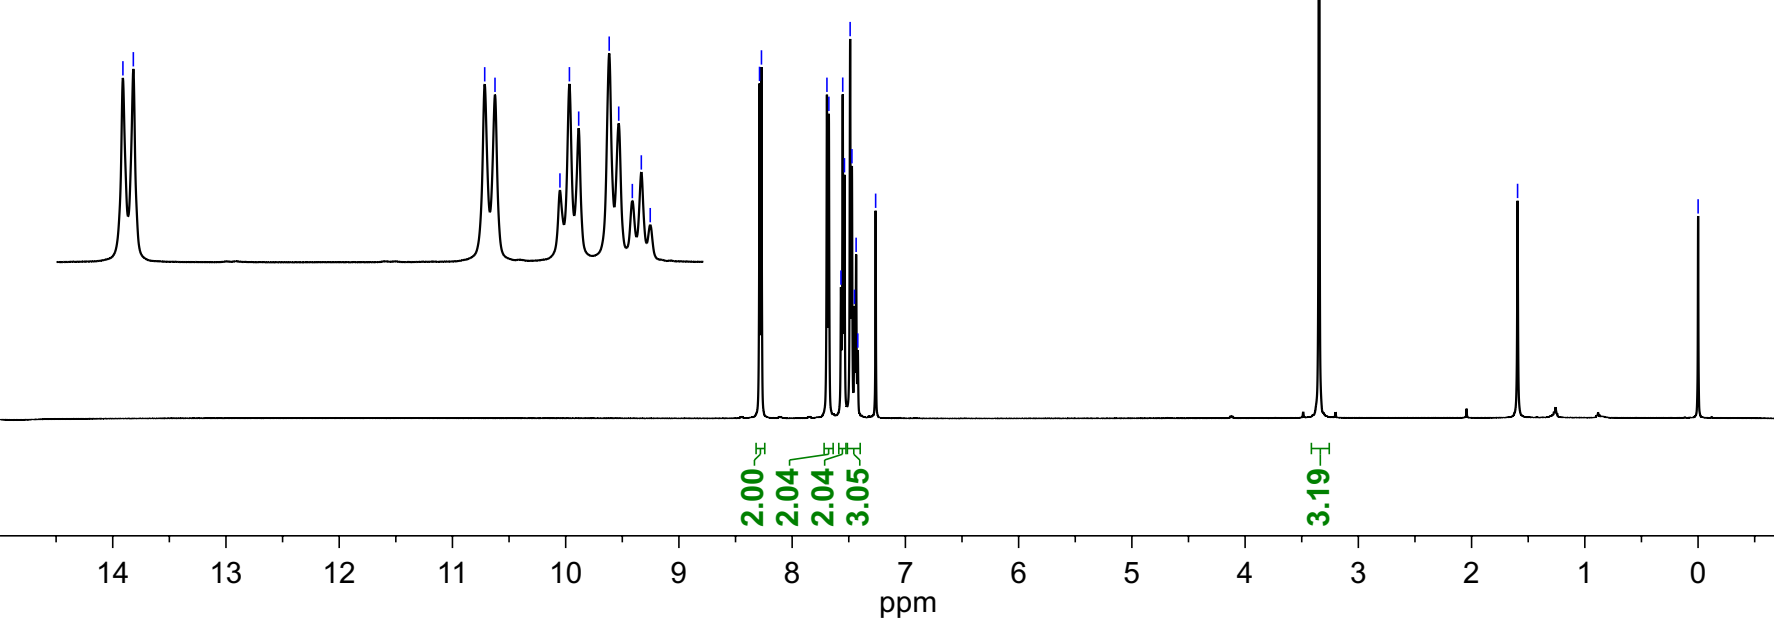

|         |                |
|---------|----------------|
| NAME    | ESh828         |
| EXPNO   | 1              |
| PROCNO  | 1              |
| USER    | urahmr         |
| Date_   | 20210903       |
| Time    | 14.04          |
| INSTRUM | AV500          |
| PROBHD  | 5 mm PABBO BB- |
| PULPROG | zg30           |
| SOLVENT | CDCl3          |
| TD      | 32768          |
| SW      | 16.0214 ppm    |
| O1P     | 7.000 ppm      |
| FIDRES  | 0.244532 Hz    |
| NS      | 16             |
| DS      | 2              |
| AQ      | 2.0447731 sec  |
| RG      | 181            |
| TE      | 296.0 K        |
| DE      | 6.50 usec      |
| D1      | 1.00000000 sec |
| TD0     | 1              |

==== CHANNEL f1 =====

|       |                 |
|-------|-----------------|
| NUC1  | 1H              |
| P1    | 12.00 usec      |
| PL1   | 0.30 dB         |
| PL1W  | 18.91792679 W   |
| SFO1  | 500.1335009 MHz |
| SI    | 32768           |
| HZpPT | 0.244532 Hz     |
| SR    | 11.22 Hz        |
| WDW   | EM              |
| LB    | 0.00 Hz         |
| GB    | 0               |
| SSB   | 0               |

<sup>13</sup>C NMR spectrum of compound **3d** in CDCl<sub>3</sub>

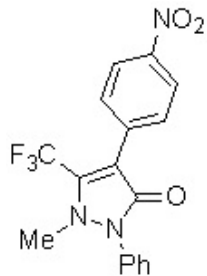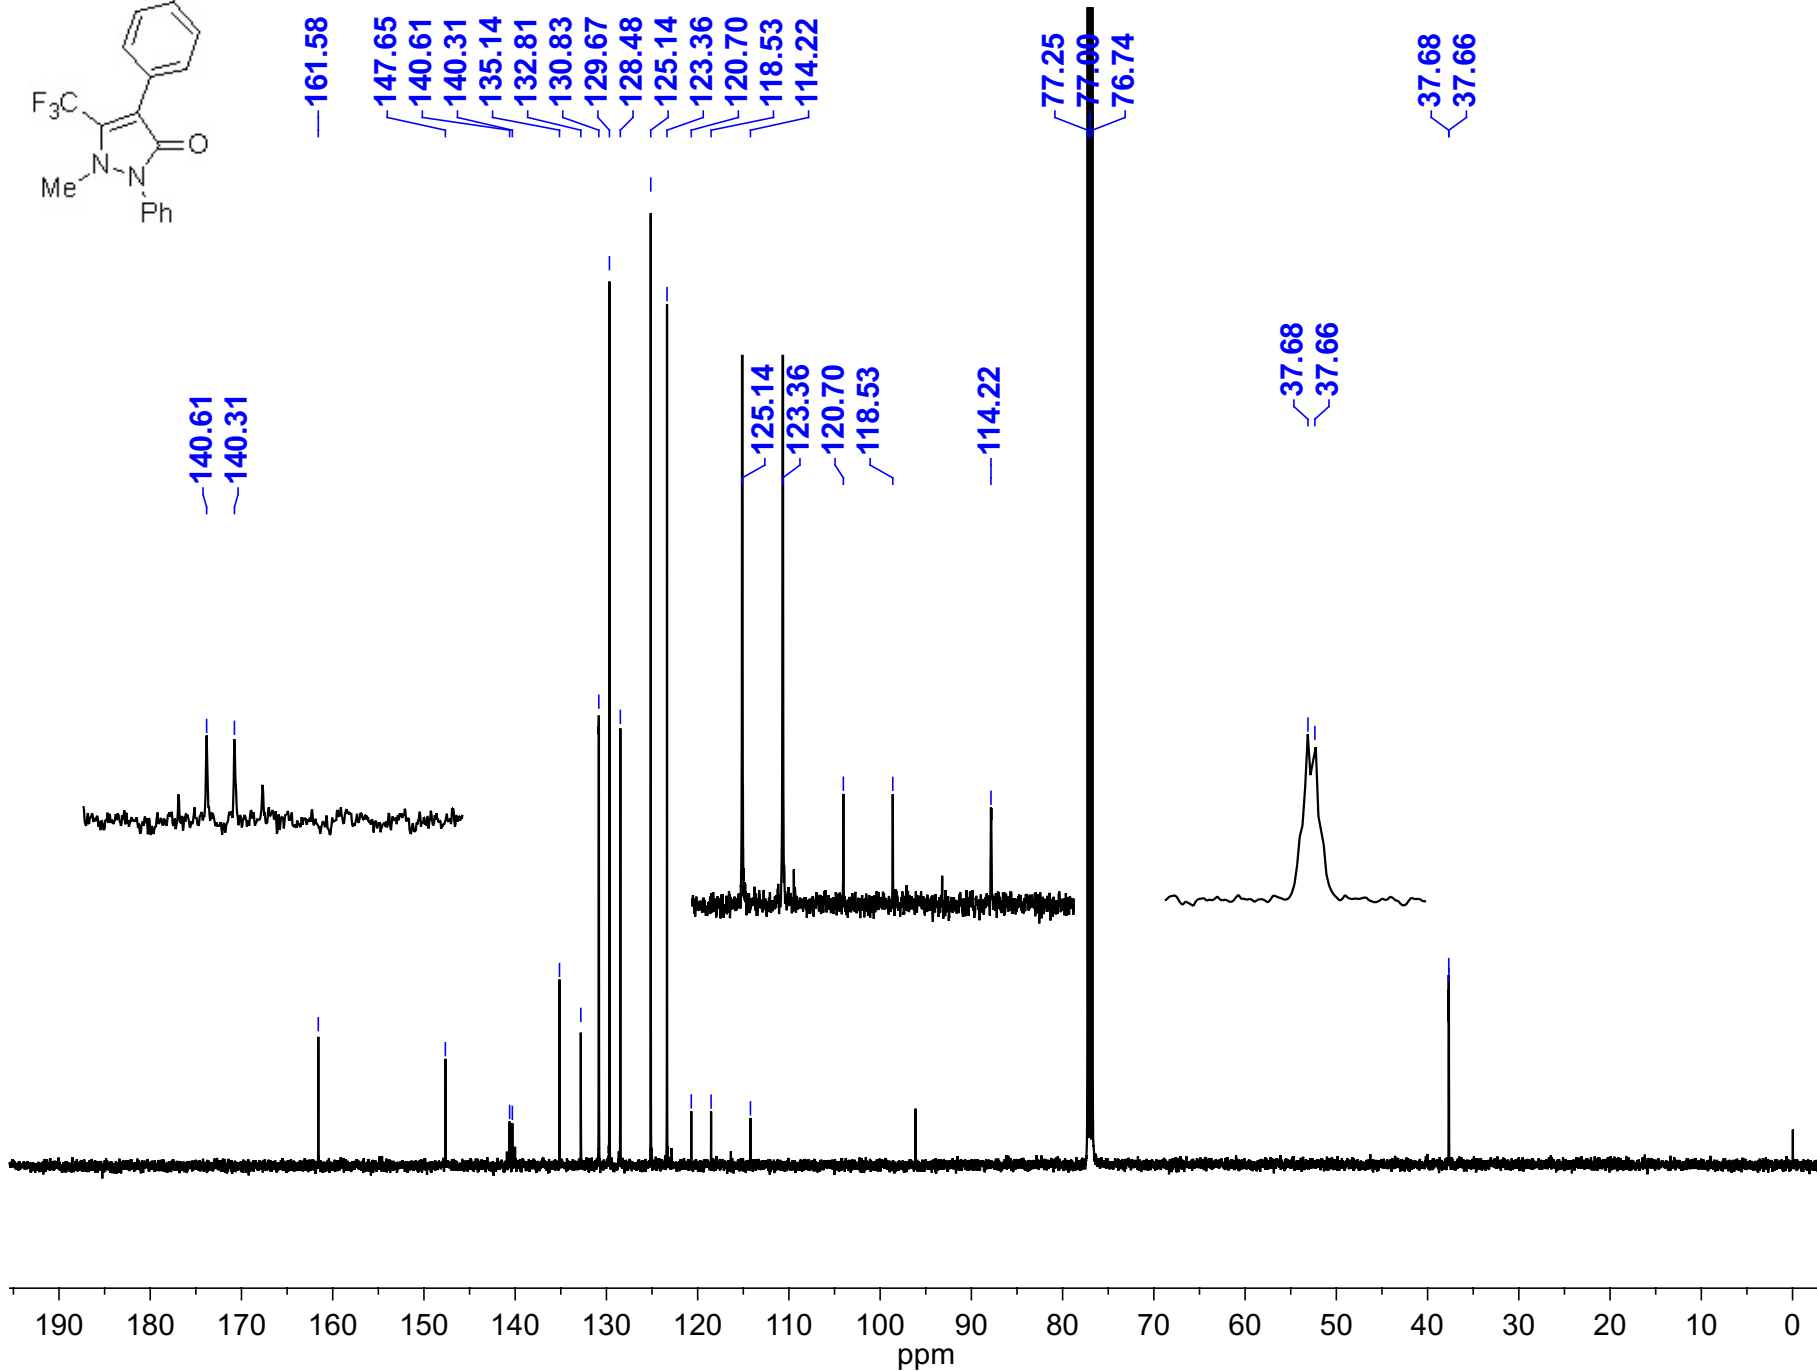

NAME ESh828  
 EXPNO 13  
 PROCNO 1  
 USER uralnmr  
 Date\_ 20210903  
 Time 14.12  
 INSTRUM AV500  
 PROBHD 5 mm PABBO BB-  
 PULPROG zgpg30  
 SOLVENT CDCl3  
 TD 32768  
 SW 200.7838 ppm  
 O1P 95.000 ppm  
 FIDRES 0.770646 Hz  
 NS 3072  
 DS 8  
 AQ 0.6488564 sec  
 RG 203  
 TE 296.0 K  
 DE 6.50 usec  
 D1 0.85000002 sec  
 D11 0.03000000 sec  
 TD0 1

==== CHANNEL f1 ====  
 NUC1 13C  
 P1 10.00 usec  
 PL1 0.00 dB  
 PL1W 115.29558563 W  
 SFO1 125.7697360 MHz

==== CHANNEL f2 =====  
 CPDPRG2 waltz16  
 NUC2 1H  
 PCPD2 75.00 usec  
 PL2 120.00 dB  
 PL12 16.30 dB  
 PL13 19.30 dB  
 PL2W 0.00000000 W  
 PL12W 0.47519693 W  
 PL13W 0.23816262 W  
 SFO2 500.1320005 MHz  
 SI 65536  
 HZpPT 0.385323 Hz  
 SR 1.37 Hz  
 WDW EM  
 LB 1.00 Hz  
 GB 0  
 SSB 0

<sup>19</sup>F NMR spectrum of compound **3d** in CDCl<sub>3</sub>

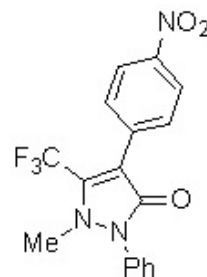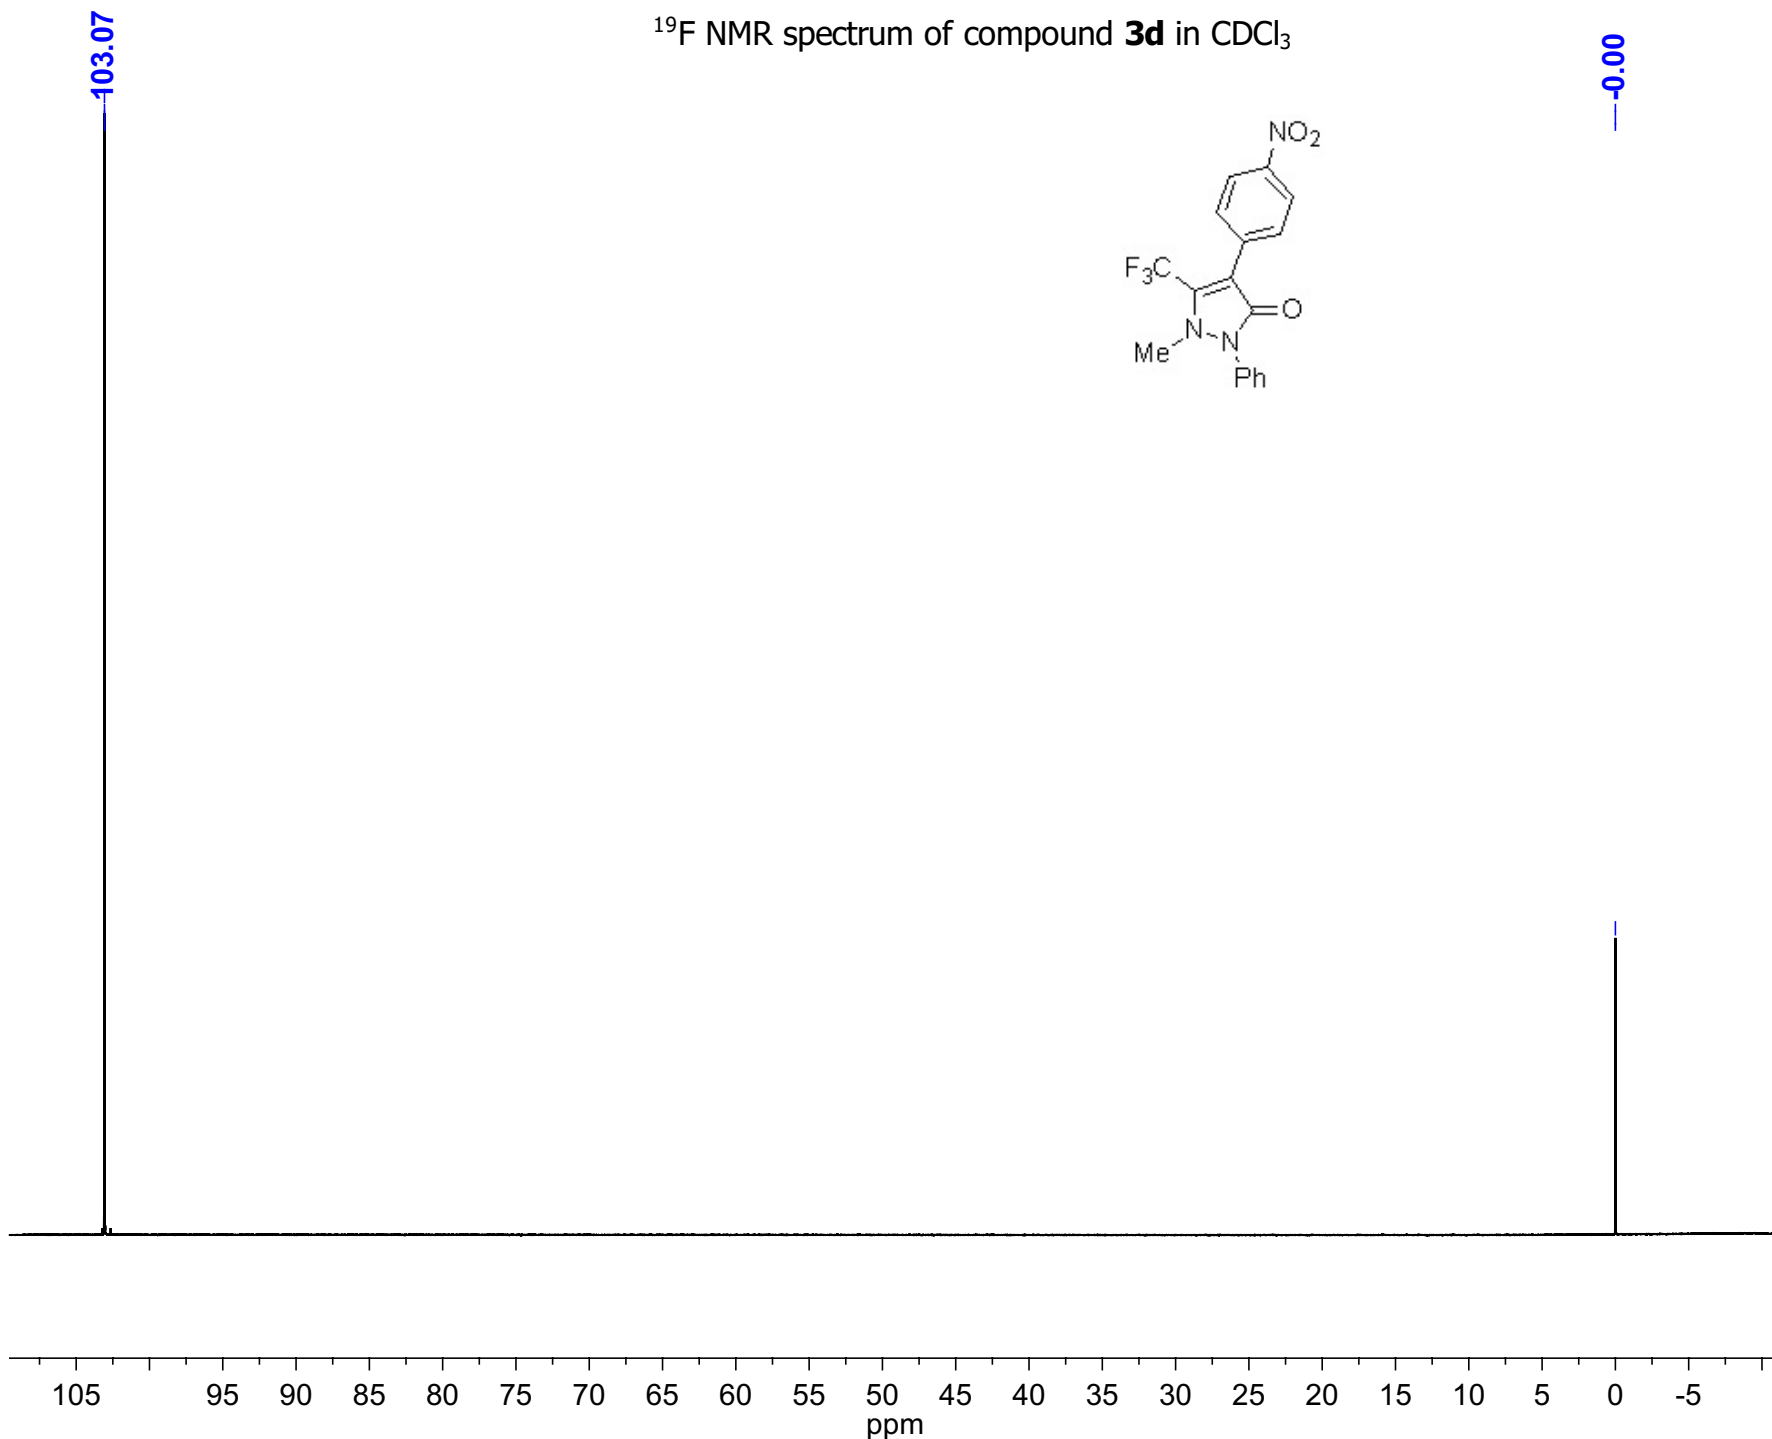

|         |                |
|---------|----------------|
| NAME    | ESh828         |
| EXPNO   | 19             |
| PROCNO  | 1              |
| USER    | urahmr         |
| Date_   | 20210903       |
| Time    | 14.09          |
| INSTRUM | AV500          |
| PROBHD  | 5 mm PABBO BB- |
| PULPROG | zg30           |
| SOLVENT | CDCl3          |
| TD      | 131072         |
| SW      | 120.7512 ppm   |
| O1P     | 50.000 ppm     |
| FIDRES  | 0.433488 Hz    |
| NS      | 16             |
| DS      | 2              |
| AQ      | 1.1534836 sec  |
| RG      | 203            |
| TE      | 296.0 K        |
| DE      | 6.50 usec      |
| D1      | 1.00000000 sec |
| TD0     | 1              |

==== CHANNEL f1 ====

|       |                 |
|-------|-----------------|
| NUC1  | 19F             |
| P1    | 15.50 usec      |
| PL1   | -5.00 dB        |
| PL1W  | 46.07103729 W   |
| SFO1  | 470.5394058 MHz |
| SI    | 131072          |
| HZpPT | 0.433488 Hz     |
| SR    | 400.51 Hz       |
| WDW   | EM              |
| LB    | 0.00 Hz         |
| GB    | 0               |
| SSB   | 0               |



<sup>1</sup>H NMR spectrum of compound **3e** in CDCl<sub>3</sub>

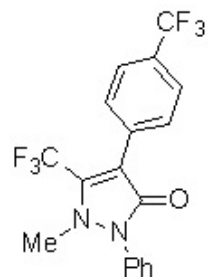

7.69  
7.67  
7.62  
7.60  
7.55  
7.54  
7.52  
7.50  
7.48  
7.42  
7.41  
7.39  
7.26

7.69  
7.67  
7.62  
7.60  
7.55  
7.54  
7.52  
7.50  
7.48  
7.42  
7.41  
7.39  
7.26

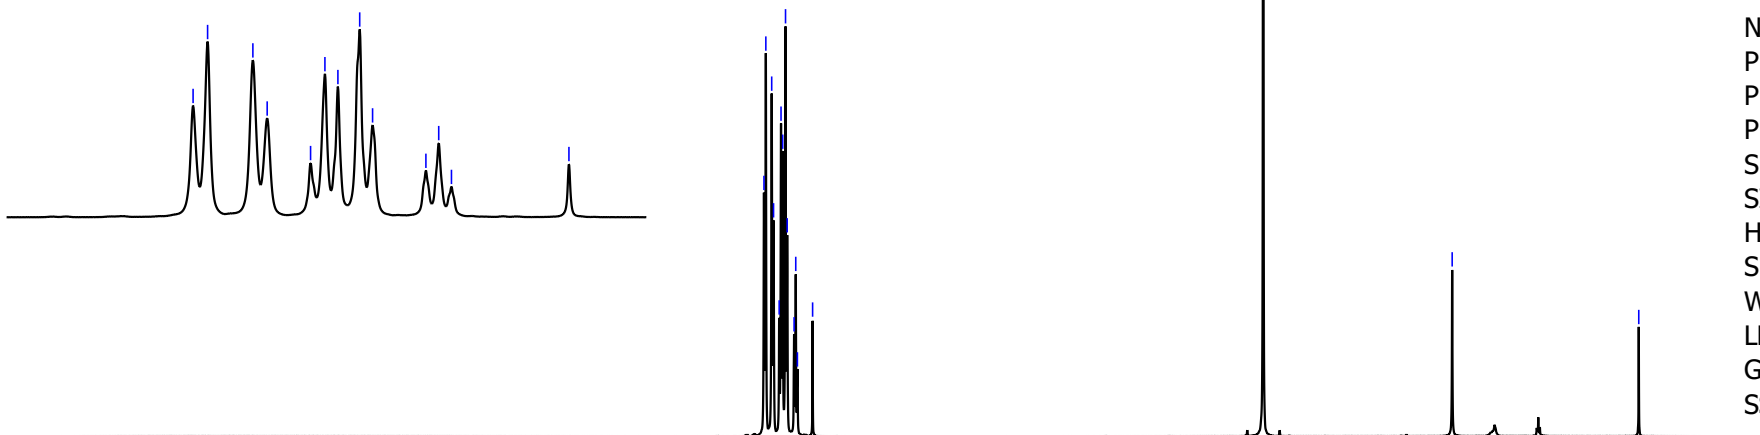

1.91  
1.87  
1.99  
1.86  
0.96  
3.00  
1.64

NAME ESh825  
EXPNO 1  
PROCNO 1  
USER uralmr  
Date\_ 20210816  
Time 13.39  
INSTRUM AV500  
PROBHD 5 mm PABBO BB-  
PULPROG zg30  
SOLVENT CDCl3  
TD 32768  
SW 16.0214 ppm  
O1P 7.000 ppm  
FIDRES 0.244532 Hz  
NS 16  
DS 2  
AQ 2.0447731 sec  
RG 101  
TE 295.3 K  
DE 6.50 usec  
D1 1.00000000 sec  
TD0 1

==== CHANNEL f1 =====  
NUC1 1H  
P1 12.00 usec  
PL1 0.30 dB  
PL1W 18.91792679 W  
SFO1 500.1335009 MHz  
SI 32768  
HZpPT 0.244532 Hz  
SR 13.20 Hz  
WDW EM  
LB 0.00 Hz  
GB 0  
SSB 0

14 13 12 11 10 9 8 7 6 5 4 3 2 1 0 -1

ppm

<sup>13</sup>C NMR spectrum of compound **3e** in CDCl<sub>3</sub>

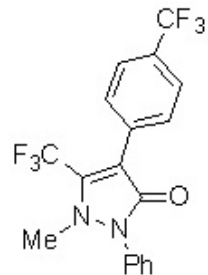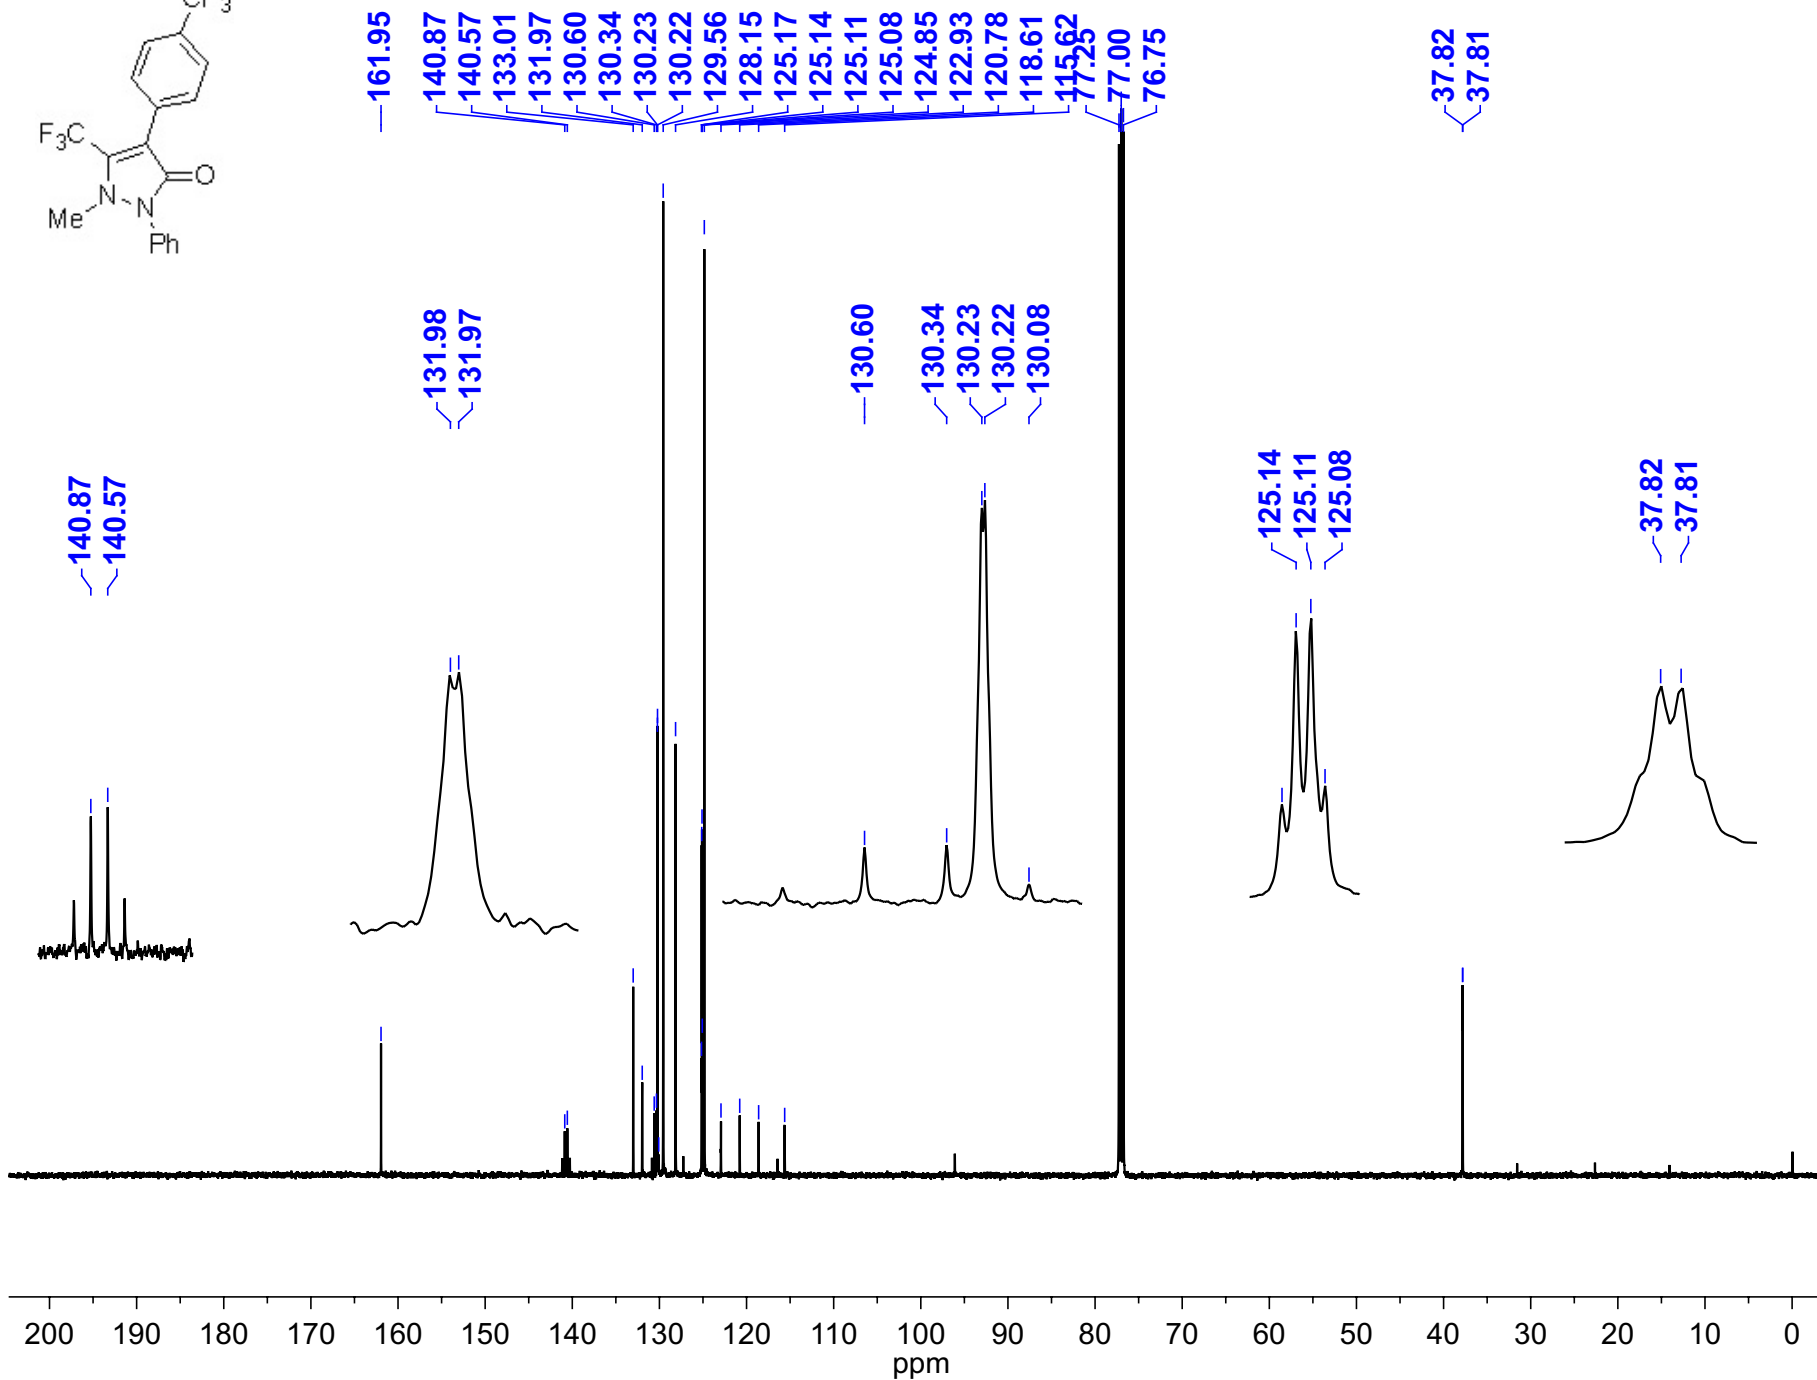

|         |                |
|---------|----------------|
| NAME    | ESh825         |
| EXPNO   | 13             |
| PROCNO  | 1              |
| USER    | uralnmr        |
| Date_   | 20210816       |
| Time    | 13.53          |
| INSTRUM | AV500          |
| PROBHD  | 5 mm PABBO BB- |
| PULPROG | zgpg30         |
| SOLVENT | CDCl3          |
| TD      | 65536          |
| SW      | 209.2368 ppm   |
| O1P     | 100.000 ppm    |
| FIDRES  | 0.401547 Hz    |
| NS      | 2048           |
| DS      | 8              |
| AQ      | 1.2452340 sec  |
| RG      | 203            |
| TE      | 296.3 K        |
| DE      | 6.50 usec      |
| D1      | 1.00000000 sec |
| D11     | 0.03000000 sec |
| TDO     | 1              |

==== CHANNEL f1 =====

|      |                 |
|------|-----------------|
| NUC1 | 13C             |
| P1   | 10.00 usec      |
| PL1  | 0.00 dB         |
| PL1W | 115.29558563 W  |
| SFO1 | 125.7703648 MHz |

===== CHANNEL f2 =====

|         |                 |
|---------|-----------------|
| CPDPRG2 | waltz16         |
| NUC2    | 1H              |
| PCPD2   | 75.00 usec      |
| PL2     | 120.00 dB       |
| PL12    | 16.30 dB        |
| PL13    | 19.30 dB        |
| PL2W    | 0.00000000 W    |
| PL12W   | 0.47519693 W    |
| PL13W   | 0.23816262 W    |
| SFO2    | 500.1320005 MHz |
| SI      | 65536           |
| HZpPT   | 0.401547 Hz     |
| SR      | 4.27 Hz         |
| WDW     | EM              |
| LB      | 1.00 Hz         |
| GB      | 0               |
| SSB     | 0               |

<sup>19</sup>F NMR spectrum of compound **3e** in CDCl<sub>3</sub>

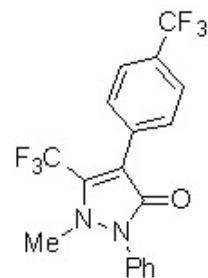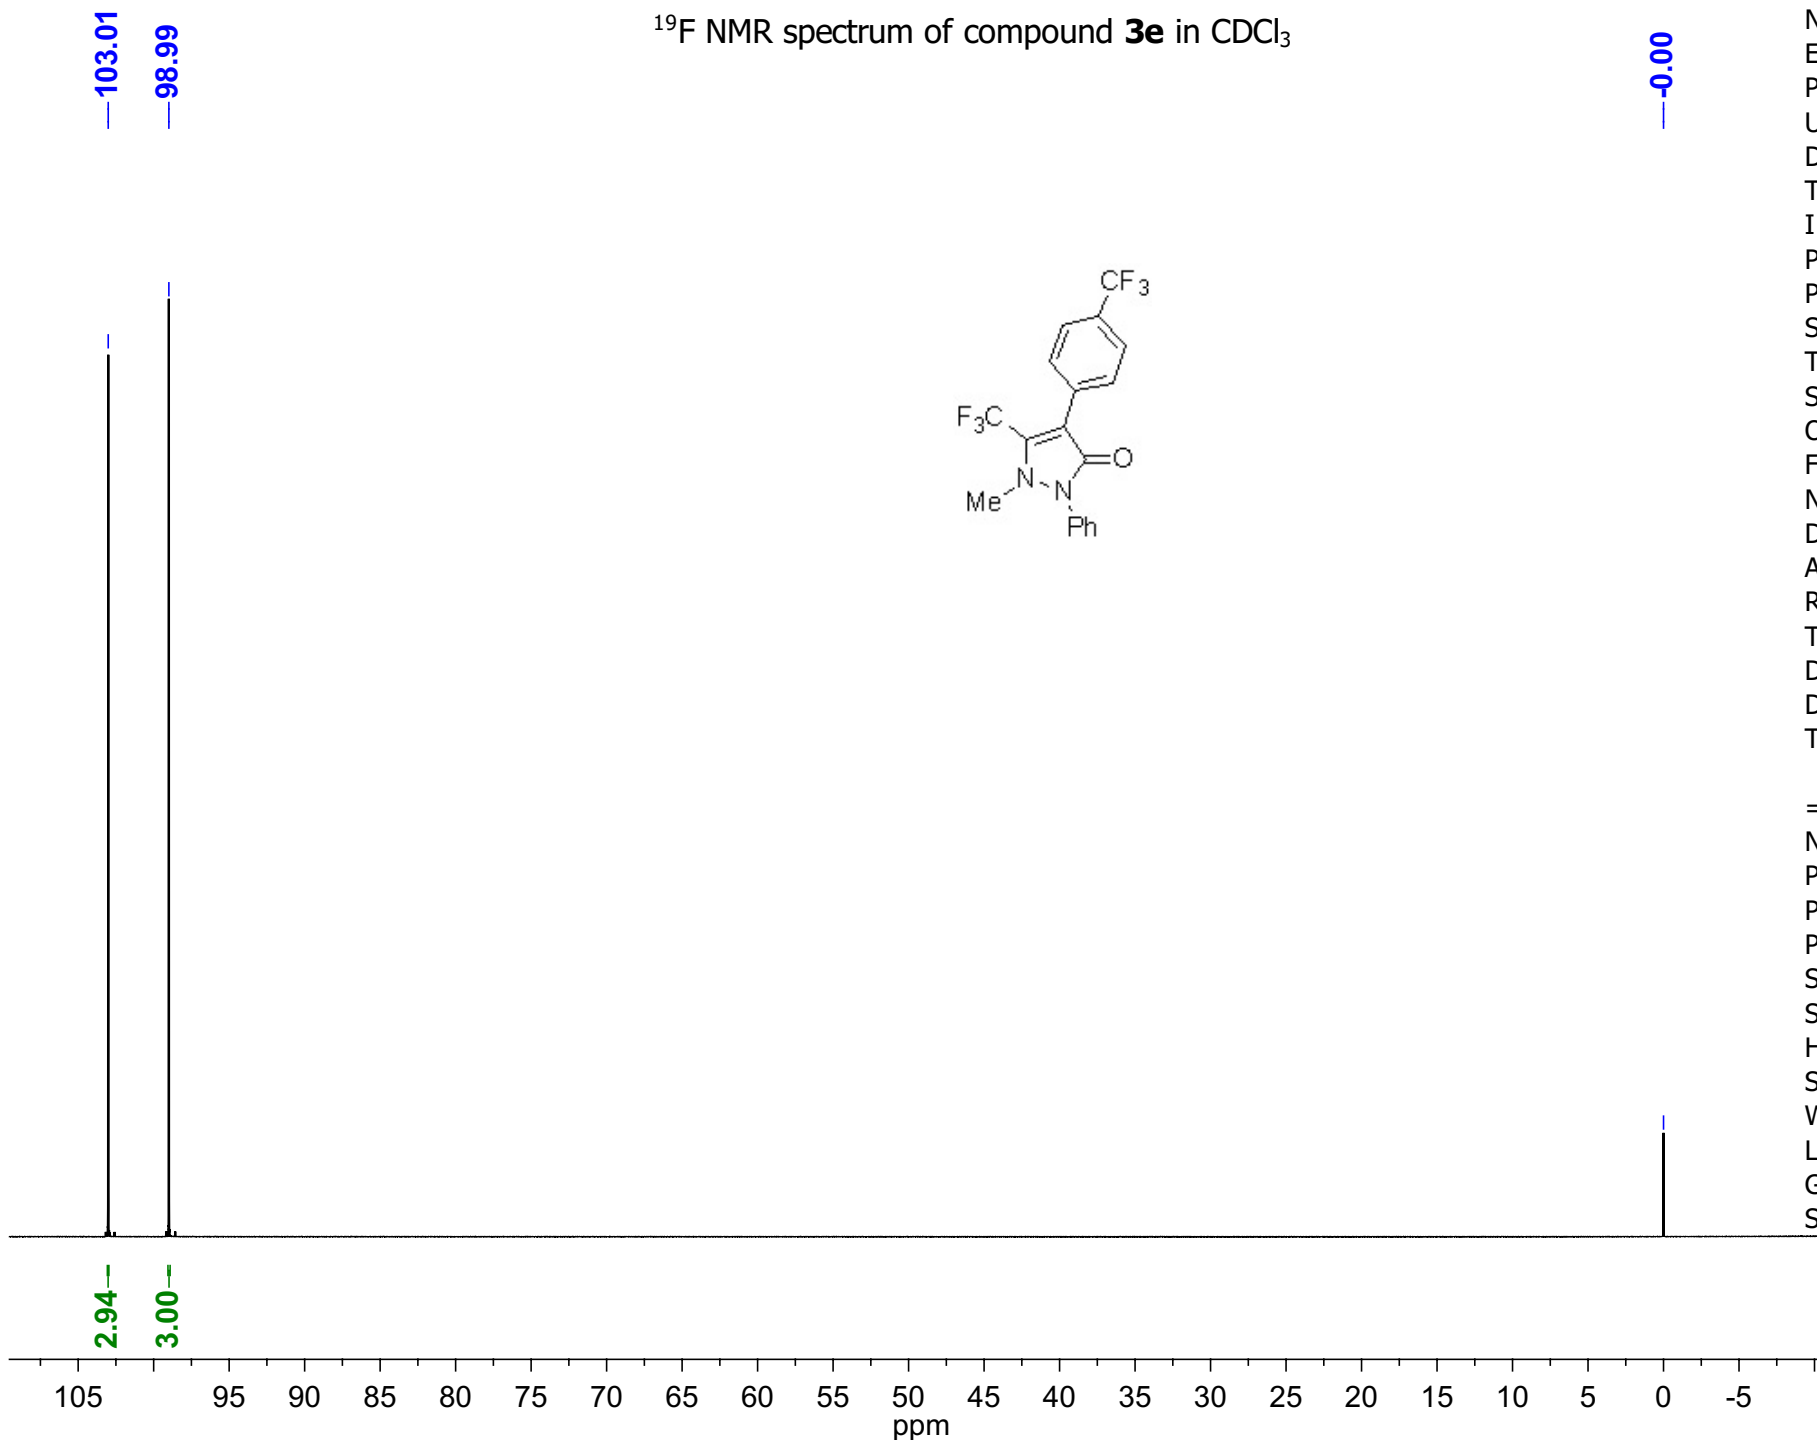

NAME ESh825  
EXPNO 19  
PROCNO 1  
USER uralhmr  
Date\_ 20210816  
Time 13.43  
INSTRUM AV500  
PROBHD 5 mm PABBO BB-  
PULPROG zg30  
SOLVENT CDCl3  
TD 131072  
SW 120.7512 ppm  
O1P 50.000 ppm  
FIDRES 0.433488 Hz  
NS 16  
DS 2  
AQ 1.1534836 sec  
RG 203  
TE 295.3 K  
DE 6.50 usec  
D1 1.00000000 sec  
TD0 1

==== CHANNEL f1 =====  
NUC1 19F  
P1 15.50 usec  
PL1 -5.00 dB  
PL1W 46.07103729 W  
SFO1 470.5394058 MHz  
SI 131072  
HZpPT 0.433488 Hz  
SR 390.01 Hz  
WDW EM  
LB 0.00 Hz  
GB 0  
SSB 0

<sup>1</sup>H NMR spectrum of compound **3f** in CDCl<sub>3</sub>

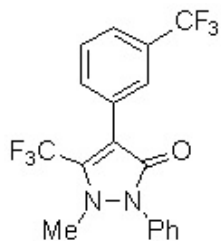

7.77  
7.68  
7.66  
7.65  
7.63  
7.54  
7.52  
7.50  
7.49  
7.42  
7.41  
7.39  
7.26

7.77  
7.68  
7.66  
7.65  
7.63  
7.54  
7.52  
7.50  
7.49  
7.42  
7.41  
7.26

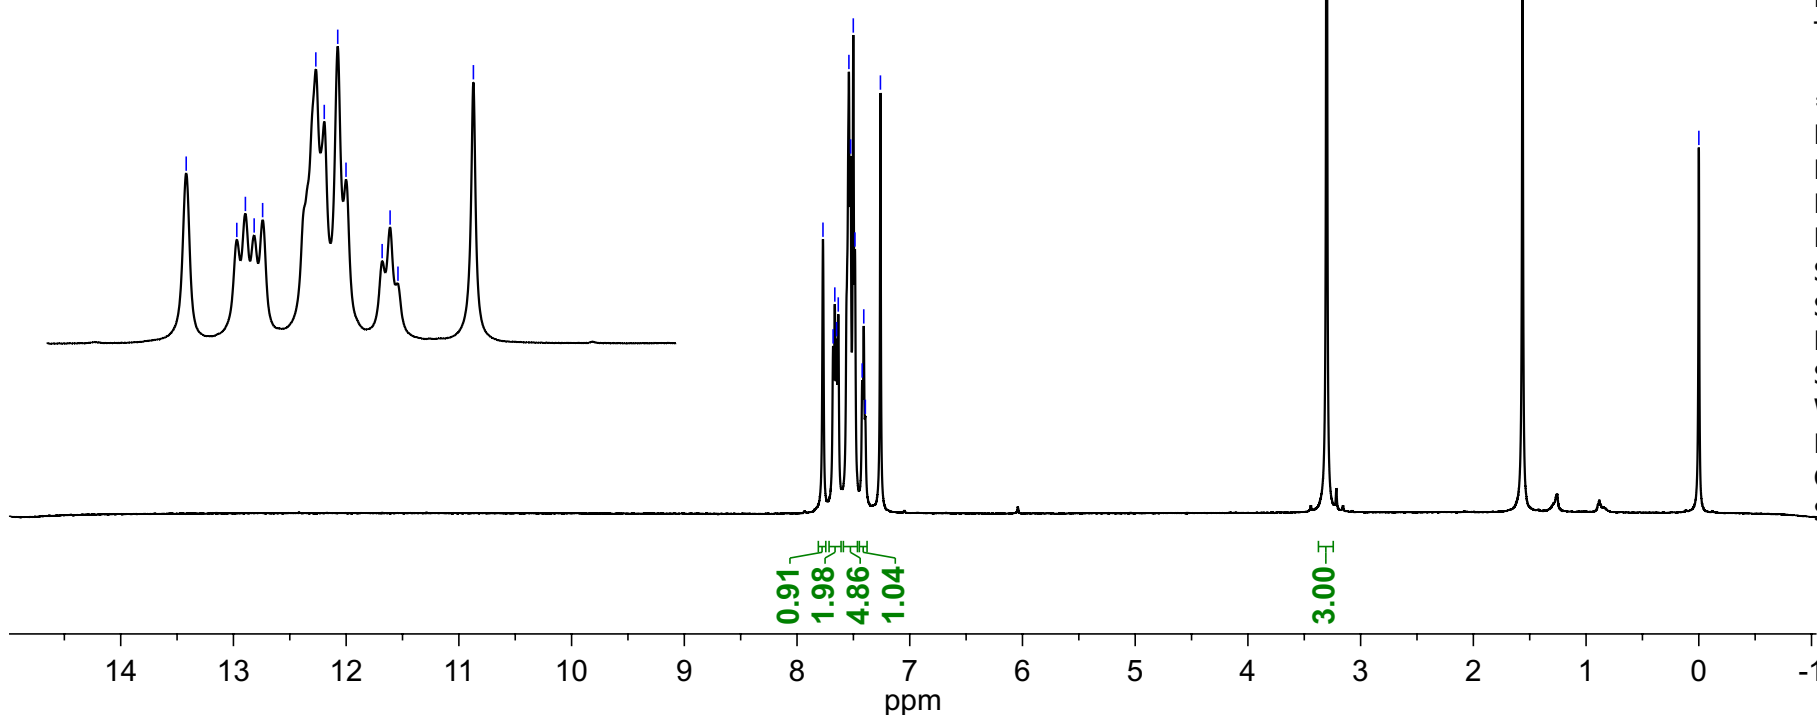

NAME ESh826  
EXPNO 1  
PROCNO 1  
USER uralnmr  
Date\_ 20210820  
Time 16.45  
INSTRUM AV500  
PROBHD 5 mm PABBO BB-  
PULPROG zg30  
SOLVENT CDCl3  
TD 32768  
SW 16.0214 ppm  
O1P 7.000 ppm  
FIDRES 0.244532 Hz  
NS 32  
DS 2  
AQ 2.0447731 sec  
RG 203  
TE 296.4 K  
DE 6.50 usec  
D1 1.00000000 sec  
TD0 1

==== CHANNEL f1 =====  
NUC1 1H  
P1 12.00 usec  
PL1 0.30 dB  
PL1W 18.91792679 W  
SFO1 500.1335009 MHz  
SI 32768  
HZpPT 0.244532 Hz  
SR 13.45 Hz  
WDW EM  
LB 0.00 Hz  
GB 0  
SSB 0

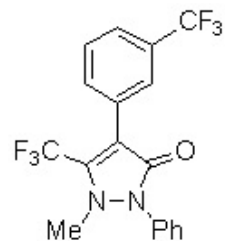

<sup>13</sup>C NMR spectrum of compound **3f** in CDCl<sub>3</sub>

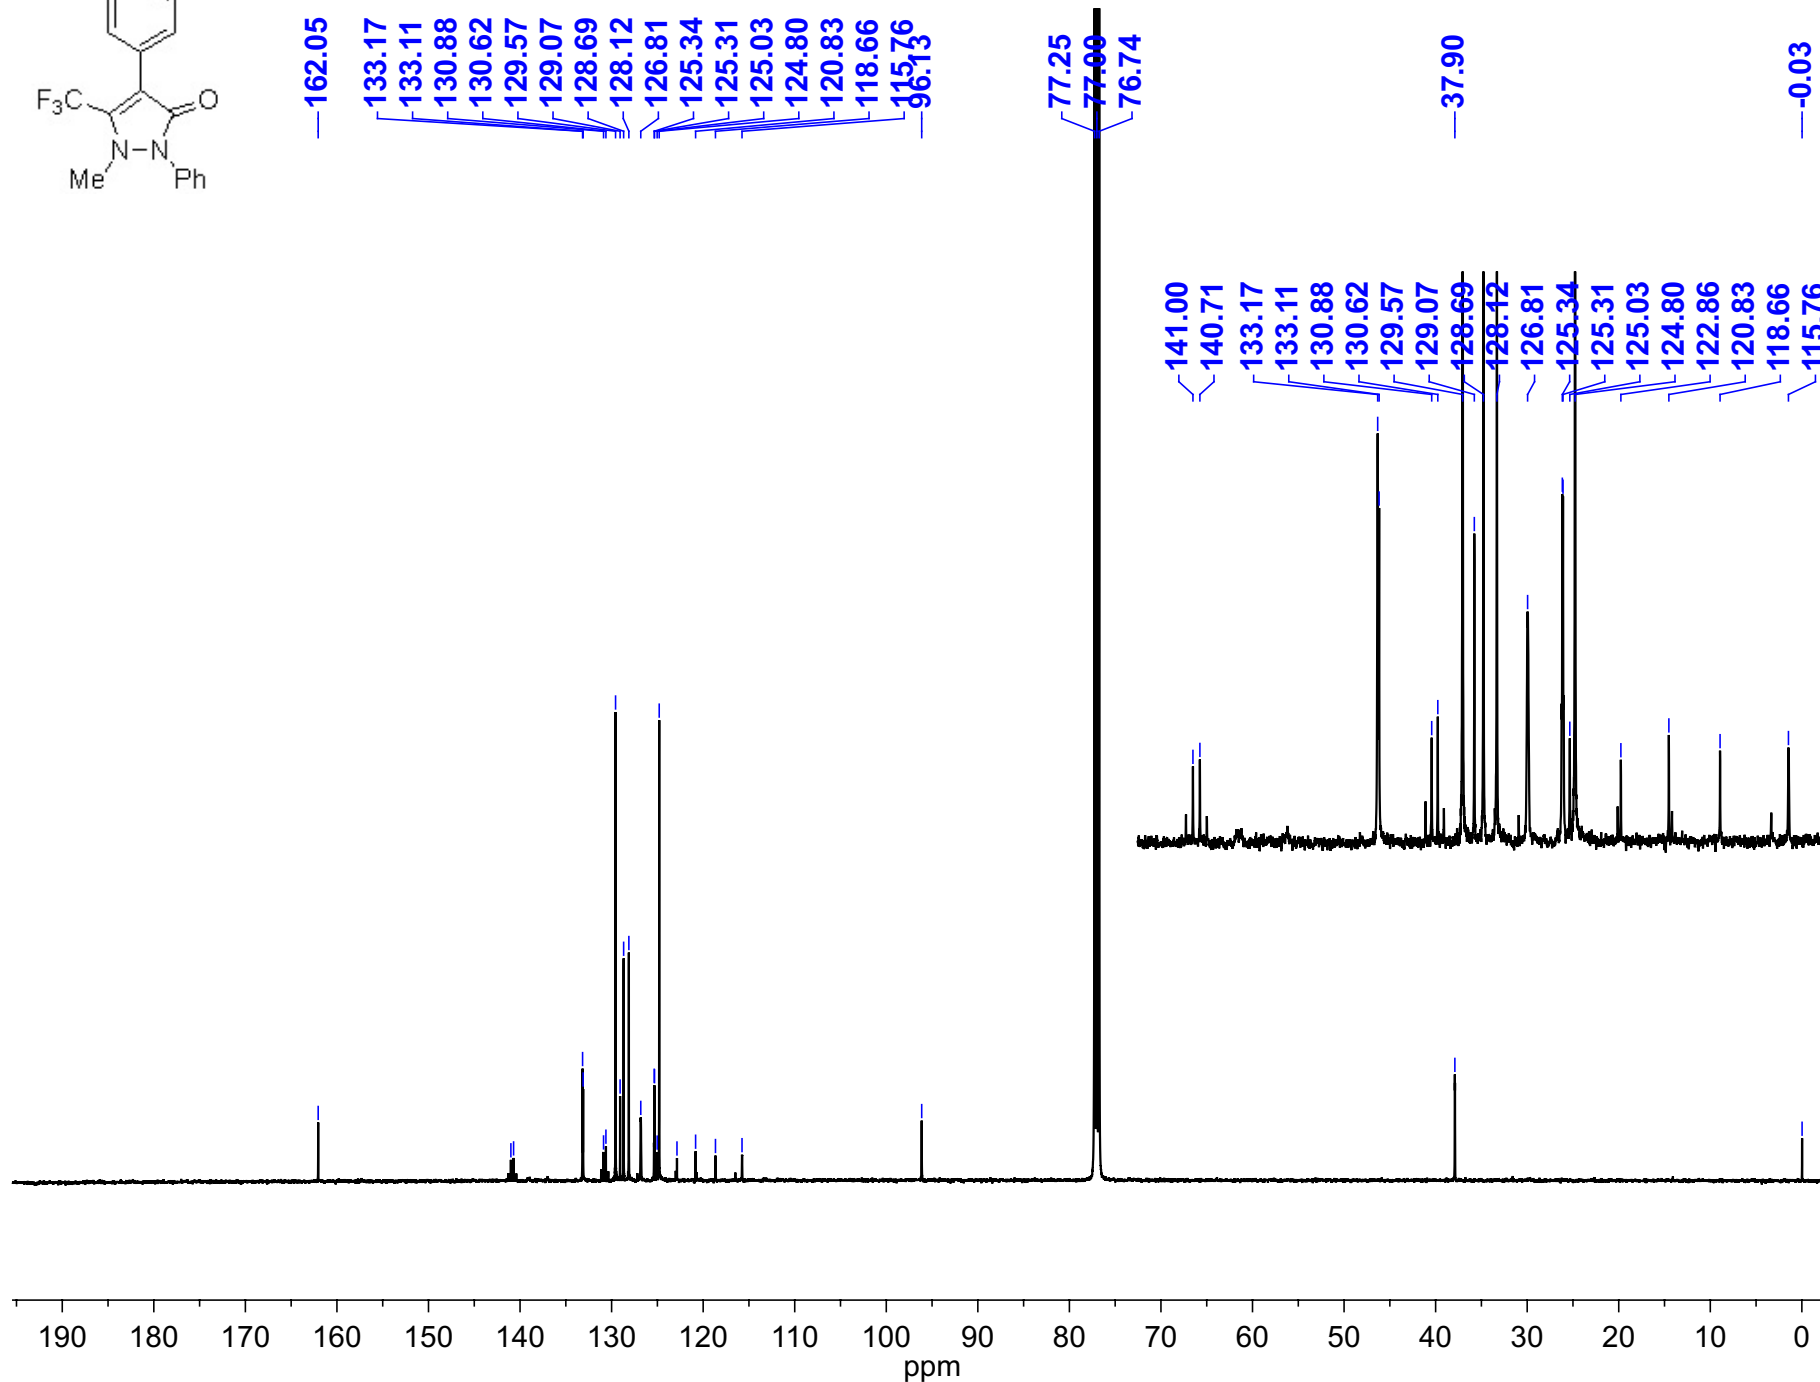

|         |                |
|---------|----------------|
| NAME    | ESH826         |
| EXPNO   | 13             |
| PROCNO  | 1              |
| USER    | uralnmr        |
| Date_   | 20210820       |
| Time    | 16.57          |
| INSTRUM | AV500          |
| PROBHD  | 5 mm PABBO BB- |
| PULPROG | zgpg30         |
| SOLVENT | CDCl3          |
| TD      | 32768          |
| SW      | 200.7838 ppm   |
| O1P     | 95.000 ppm     |
| FIDRES  | 0.770646 Hz    |
| NS      | 49152          |
| DS      | 8              |
| AQ      | 0.6488564 sec  |
| RG      | 203            |
| TE      | 297.1 K        |
| DE      | 6.50 usec      |
| D1      | 1.00000000 sec |
| D11     | 0.03000000 sec |
| TD0     | 48             |

==== CHANNEL f1 =====

|      |                 |
|------|-----------------|
| NUC1 | 13C             |
| P1   | 10.00 usec      |
| PL1  | 0.00 dB         |
| PL1W | 115.29558563 W  |
| SFO1 | 125.7697360 MHz |

==== CHANNEL f2 =====

|         |                 |
|---------|-----------------|
| CPDPRG2 | waltz16         |
| NUC2    | 1H              |
| PCPD2   | 75.00 usec      |
| PL2     | 120.00 dB       |
| PL12    | 16.30 dB        |
| PL13    | 19.30 dB        |
| PL2W    | 0.00000000 W    |
| PL12W   | 0.47519693 W    |
| PL13W   | 0.23816262 W    |
| SFO2    | 500.1320005 MHz |
| SI      | 65536           |
| HZpPT   | 0.385323 Hz     |
| SR      | 0.05 Hz         |
| WDW     | EM              |
| LB      | 1.00 Hz         |
| GB      | 0               |
| SSB     | 0               |

<sup>19</sup>F NMR spectrum of compound **3f** in CDCl<sub>3</sub>

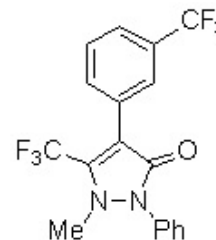

— 0.00

|         |                |
|---------|----------------|
| NAME    | ESh826         |
| EXPNO   | 19             |
| PROCNO  | 1              |
| USER    | uralnmr        |
| Date_   | 20210820       |
| Time    | 16.49          |
| INSTRUM | AV500          |
| PROBHD  | 5 mm PABBO BB- |
| PULPROG | zg30           |
| SOLVENT | CDCl3          |
| TD      | 131072         |
| SW      | 120.7506 ppm   |
| O1P     | 55.000 ppm     |
| FIDRES  | 0.433488 Hz    |
| NS      | 16             |
| DS      | 2              |
| AQ      | 1.1534836 sec  |
| RG      | 203            |
| TE      | 296.4 K        |
| DE      | 6.50 usec      |
| D1      | 1.00000000 sec |
| TD0     | 1              |

====CHANNEL f1====  
NUC1 19F  
P1 15.50 usec  
PL1 -5.00 dB  
PL1W 46.07103729 W  
SFO1 470.5417584 MHz  
SI 131072  
HZpPT 0.433488 Hz  
SR 398.60 Hz  
WDW EM  
LB 0.00 Hz  
GB 0  
SSB 0

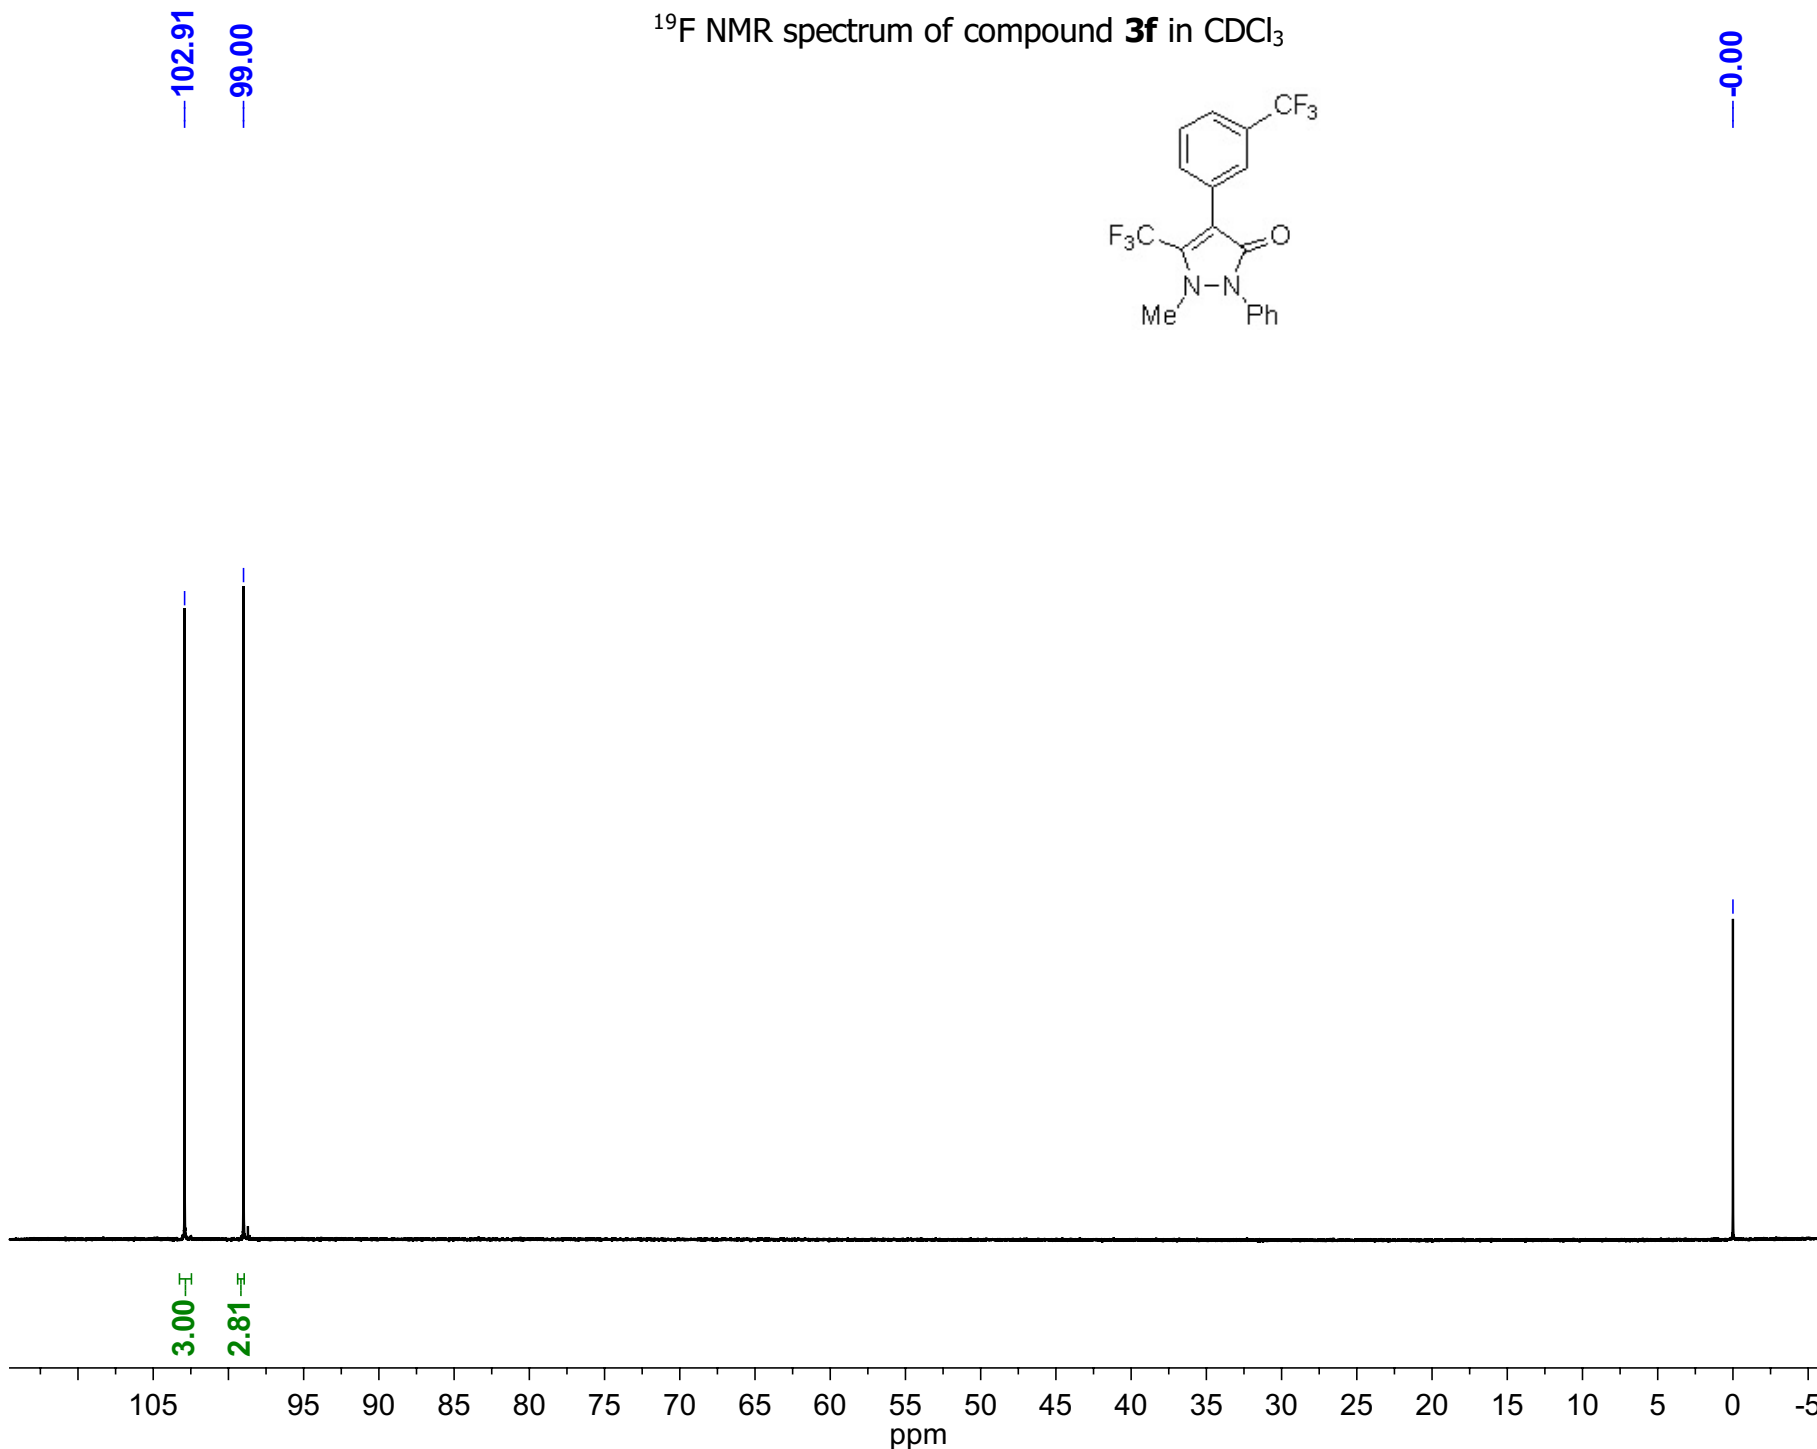

<sup>1</sup>H NMR spectrum of compound **3g** in DMSO-*d*<sub>6</sub>

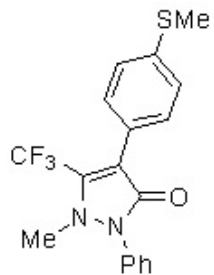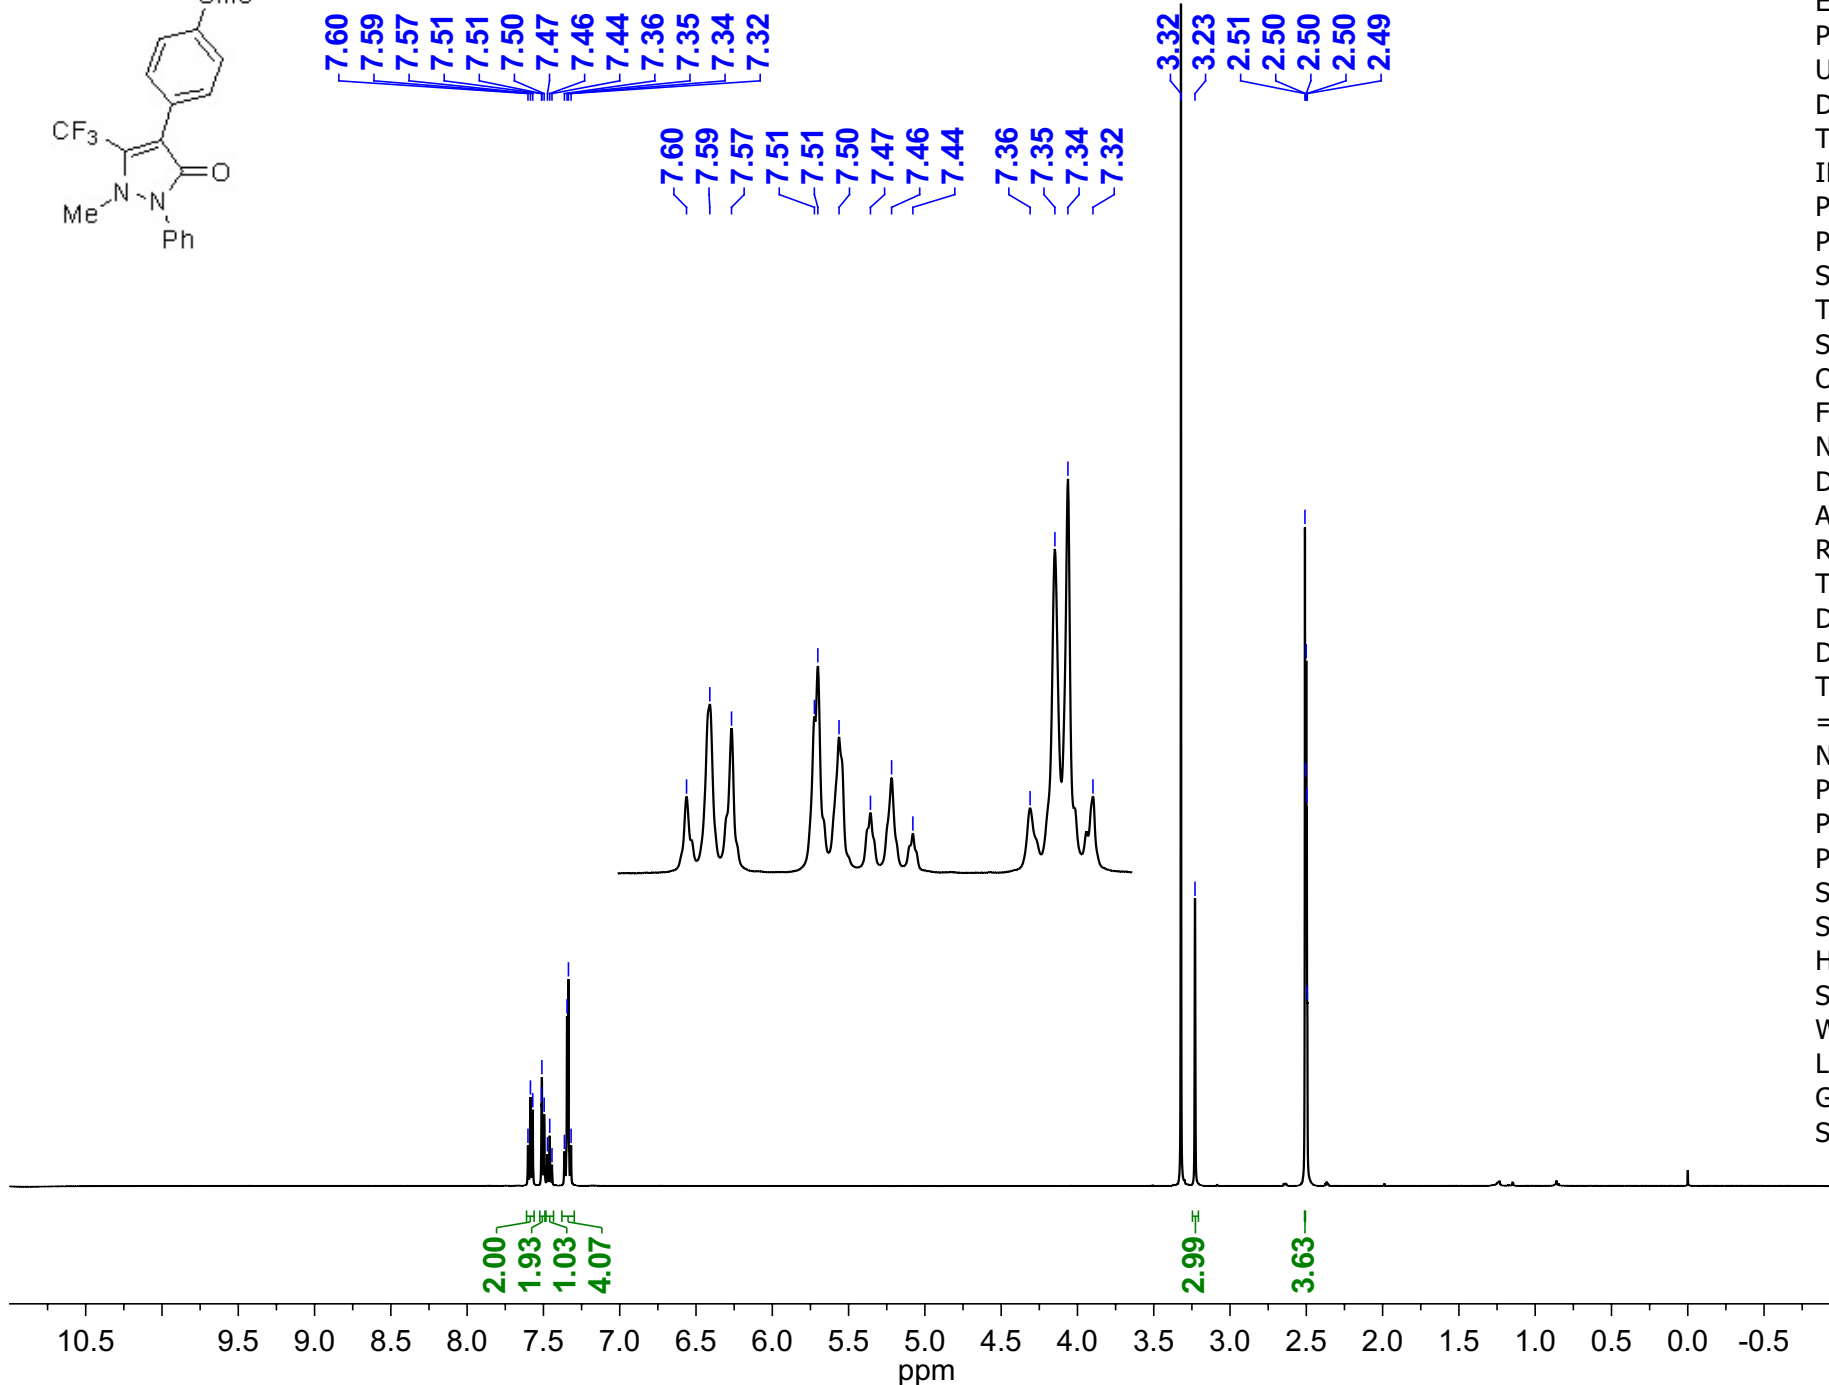

|                       |                 |
|-----------------------|-----------------|
| NAME                  | ESH698          |
| EXPNO                 | 1               |
| PROCNO                | 1               |
| USER                  | uralnmr         |
| Date_                 | 20191001        |
| Time                  | 11.08           |
| INSTRUM               | AV500           |
| PROBHD                | 5 mm PABBO BB-  |
| PULPROG               | zg30            |
| SOLVENT               | DMSO            |
| TD                    | 32768           |
| SW                    | 12.0160 ppm     |
| O1P                   | 5.000 ppm       |
| FIDRES                | 0.183399 Hz     |
| NS                    | 16              |
| DS                    | 2               |
| AQ                    | 2.7263477 sec   |
| RG                    | 203             |
| TE                    | 296.6 K         |
| DE                    | 16.00 usec      |
| D1                    | 1.00000000 sec  |
| TD0                   | 1               |
| ==== CHANNEL f1 ===== |                 |
| NUC1                  | 1H              |
| P1                    | 12.00 usec      |
| PL1                   | 0.30 dB         |
| PL1W                  | 18.91792679 W   |
| SFO1                  | 500.1325007 MHz |
| SI                    | 32768           |
| HZpPT                 | 0.183399 Hz     |
| SR                    | 5.33 Hz         |
| WDW                   | EM              |
| LB                    | 0.00 Hz         |
| GB                    | 0               |
| SSB                   | 0               |

<sup>13</sup>C NMR spectrum of compound **3g** in DMSO-*d*<sub>6</sub>

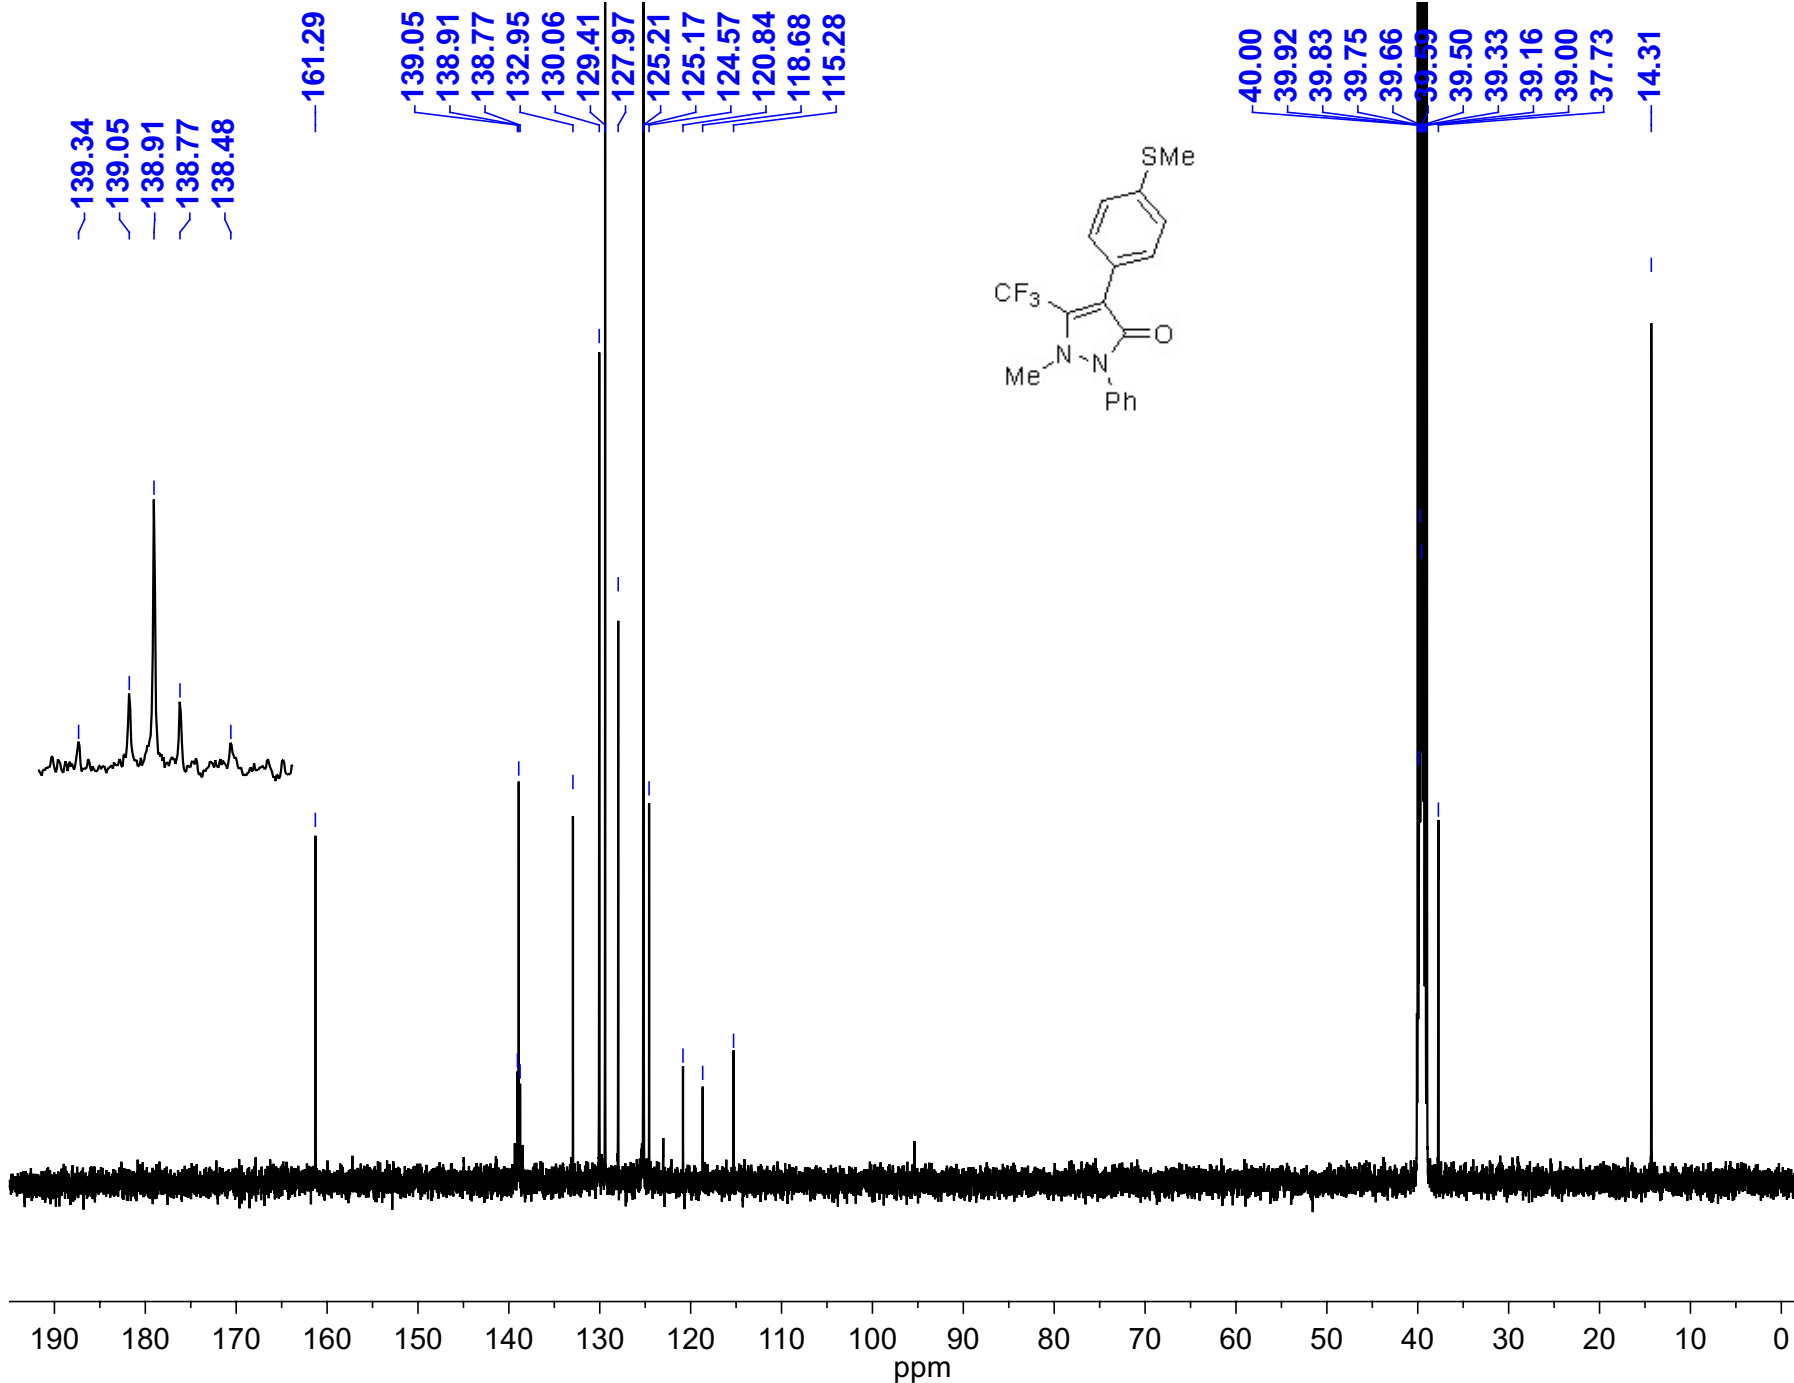

|                        |                 |
|------------------------|-----------------|
| NAME                   | Esh698          |
| EXPNO                  | 13              |
| PROCNO                 | 1               |
| USER                   | uralnmr         |
| Date_                  | 20191002        |
| Time                   | 10.57           |
| INSTRUM                | AV500           |
| PROBHD                 | 5 mm PABBO BB-  |
| PULPROG                | zgpg30          |
| SOLVENT                | DMSO            |
| TD                     | 32768           |
| SW                     | 200.7838 ppm    |
| O1P                    | 95.000 ppm      |
| FIDRES                 | 0.770646 Hz     |
| NS                     | 2048            |
| DS                     | 8               |
| AQ                     | 0.6488564 sec   |
| RG                     | 203             |
| TE                     | 297.1 K         |
| DE                     | 6.50 usec       |
| D1                     | 1.00000000 sec  |
| D11                    | 0.03000000 sec  |
| TD0                    | 2               |
| ===== CHANNEL f1 ===== |                 |
| NUC1                   | 13C             |
| P1                     | 10.00 usec      |
| PL1                    | 0.00 dB         |
| PL1W                   | 115.29558563 W  |
| SFO1                   | 125.7697360 MHz |
| ===== CHANNEL f2 ===== |                 |
| CPDPRG2                | waltz16         |
| NUC2                   | 1H              |
| PCPD2                  | 75.00 usec      |
| PL2                    | 120.00 dB       |
| PL12                   | 16.30 dB        |
| PL13                   | 19.30 dB        |
| PL2W                   | 0.00000000 W    |
| PL12W                  | 0.47519693 W    |
| PL13W                  | 0.23816262 W    |
| SFO2                   | 500.1320005 MHz |
| SI                     | 65536           |
| HZpPT                  | 0.385323 Hz     |
| SR                     | 62.03 Hz        |
| WDW                    | EM              |
| LB                     | 1.00 Hz         |
| GB                     | 0               |
| SSB                    | 0               |



<sup>19</sup>F NMR spectrum of compound **3g** in DMSO-*d*<sub>6</sub>

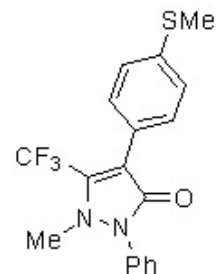

|                    |                 |
|--------------------|-----------------|
| NAME               | ESh698          |
| EXPNO              | 19              |
| PROCNO             | 1               |
| USER               | uralmr          |
| Date_              | 20191001        |
| Time               | 11.14           |
| INSTRUM            | AV500           |
| PROBHD             | 5 mm PABBO BB-  |
| PULPROG            | zg30            |
| SOLVENT            | DMSO            |
| TD                 | 131072          |
| SW                 | 120.7506 ppm    |
| O1P                | 55.000 ppm      |
| FIDRES             | 0.433488 Hz     |
| NS                 | 16              |
| DS                 | 2               |
| AQ                 | 1.1534836 sec   |
| RG                 | 203             |
| TE                 | 296.6 K         |
| DE                 | 6.50 usec       |
| D1                 | 1.00000000 sec  |
| TD0                | 1               |
| === CHANNEL f1 === |                 |
| NUC1               | 19F             |
| P1                 | 15.50 usec      |
| PL1                | -5.00 dB        |
| PL1W               | 46.07103729 W   |
| SFO1               | 470.5417584 MHz |
| SI                 | 131072          |
| HZpPT              | 0.433488 Hz     |
| SR                 | -3.69 Hz        |
| WDW                | EM              |
| LB                 | 0.00 Hz         |
| GB                 | 0               |
| SSB                | 0               |

104.68

0.00

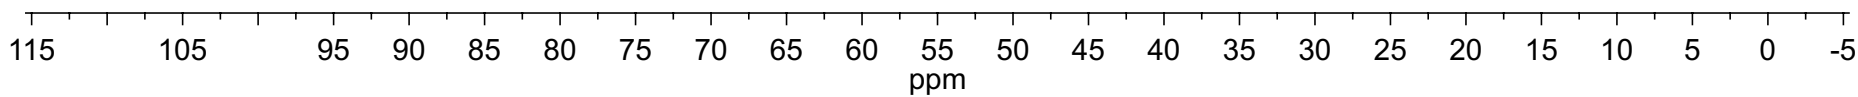

<sup>1</sup>H NMR spectrum of compound **3h** in CDCl<sub>3</sub>

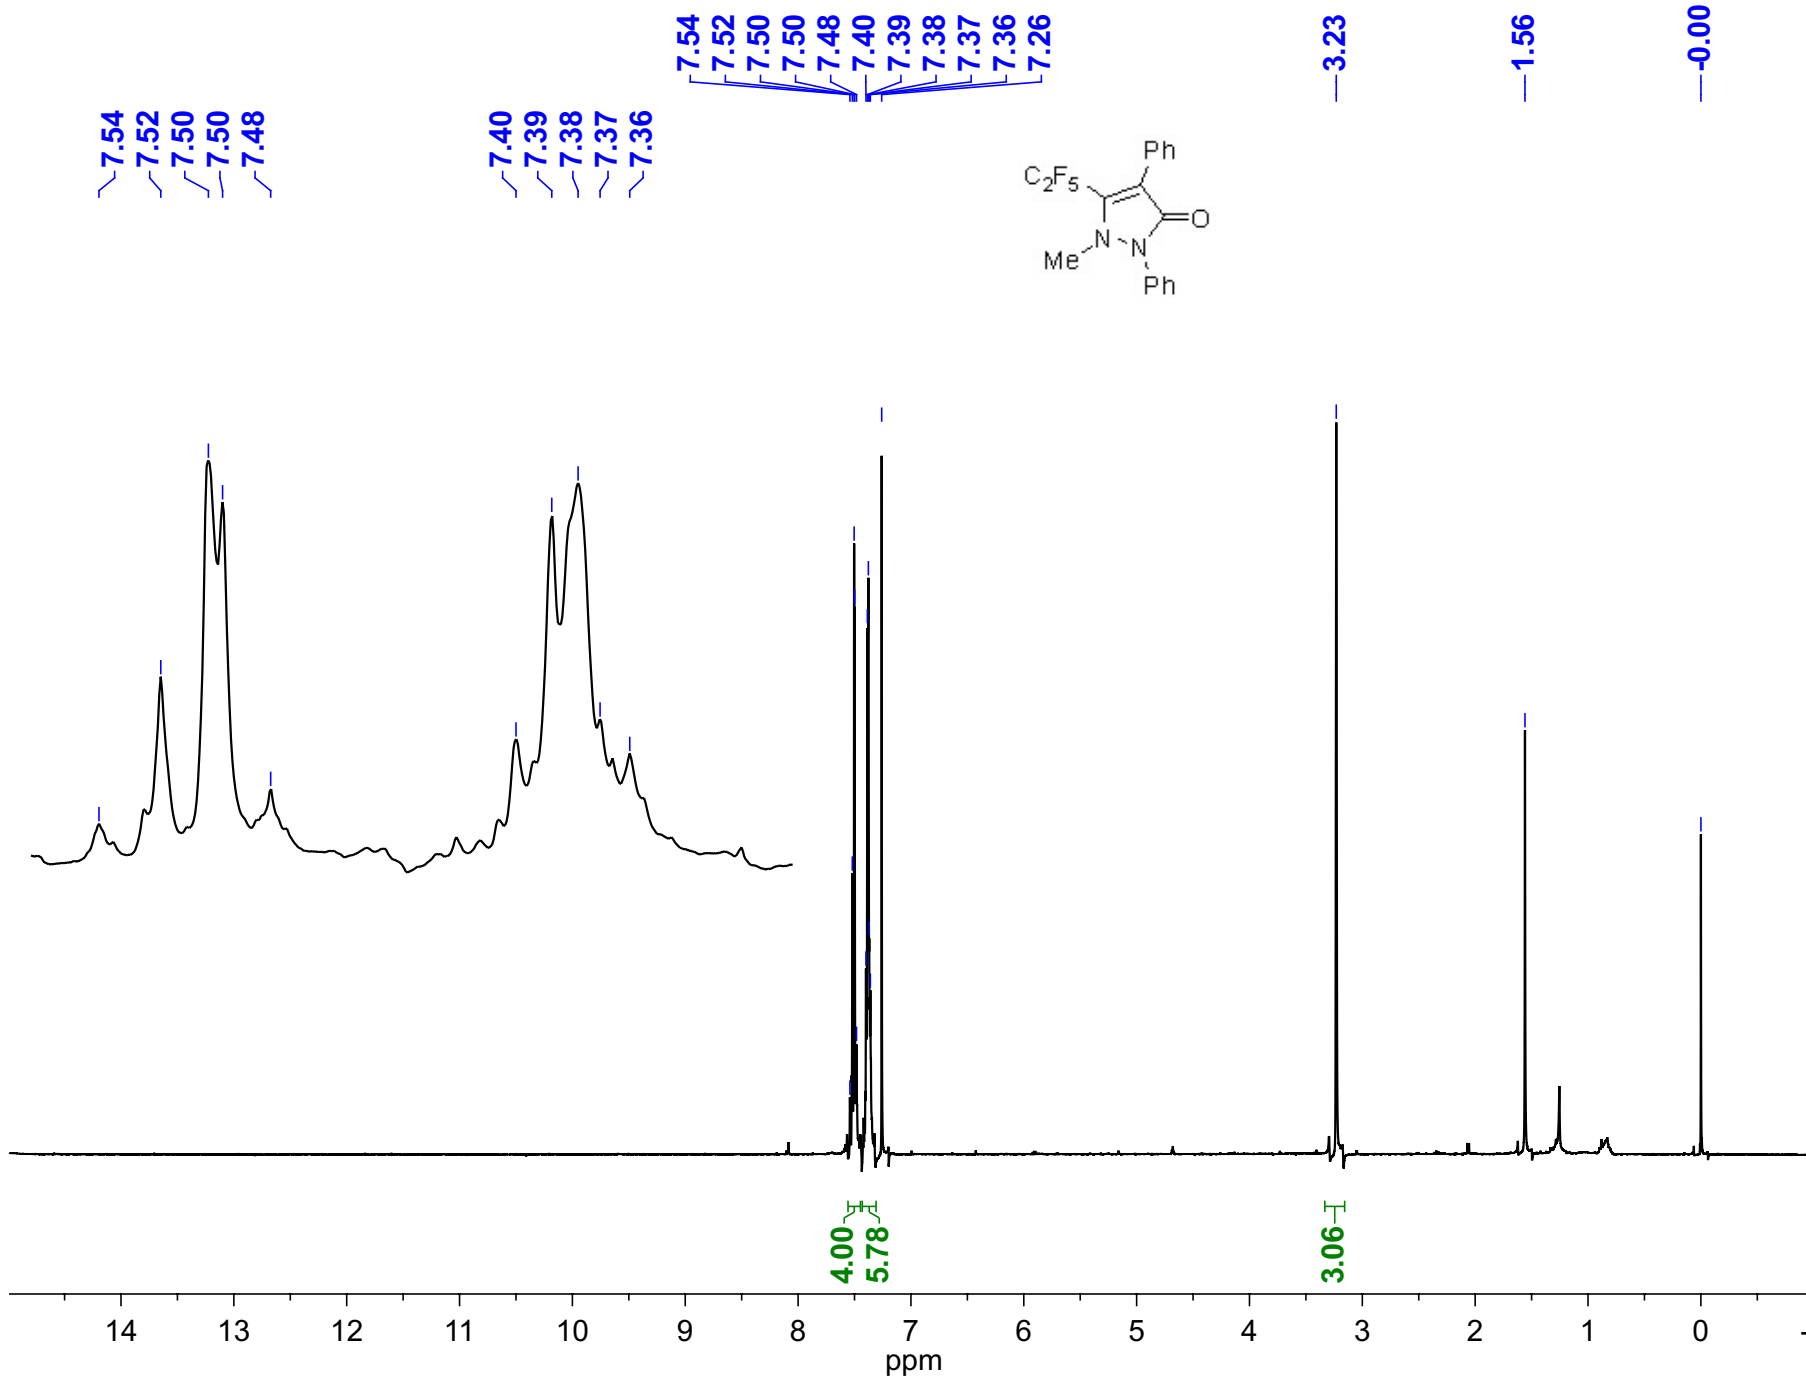

| Current Data Parameters |          |
|-------------------------|----------|
| NAME                    | ESh707   |
| EXPNO                   | 1        |
| PROCNO                  | 1        |
| USER                    | uralnrmr |

| F2 - Acquisition Parameters |                 |
|-----------------------------|-----------------|
| Date_                       | 20200131        |
| Time                        | 12.50           |
| INSTRUM                     | DRX400          |
| PROBHD                      | 5 mm SEF 19F-1  |
| PULPROG                     | zg30            |
| TD                          | 32768           |
| SOLVENT                     | CDCl3           |
| NS                          | 16              |
| DS                          | 2               |
| SWH                         | 6410.256 Hz     |
| FIDRES                      | 0.195625 Hz     |
| AQ                          | 2.5559540 sec   |
| RG                          | 574.7           |
| DW                          | 78.000 usec     |
| DE                          | 6.00 usec       |
| TE                          | 297.2 K         |
| D1                          | 1.00000000 sec  |
| MCREST                      | 0.00000000 sec  |
| MCWRK                       | 0.01500000 sec  |
| ==== CHANNEL f1 =====       |                 |
| NUC1                        | 1H              |
| P1                          | 20.00 usec      |
| PL1                         | 0.00 dB         |
| SFO1                        | 400.1328009 MHz |

| F2 - Processing parameters |                 |
|----------------------------|-----------------|
| SI                         | 32768           |
| HZpPT                      | 0.195625 Hz     |
| SF                         | 400.1300099 MHz |
| SR                         | 9.93 Hz         |
| WDW                        | EM              |
| LB                         | 0.00 Hz         |
| GB                         | 0               |
| SSB                        | 0               |
| PC                         | 4.00            |

<sup>13</sup>C NMR spectrum of compound **3h** in CDCl<sub>3</sub>

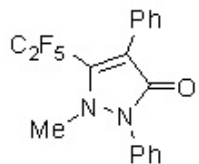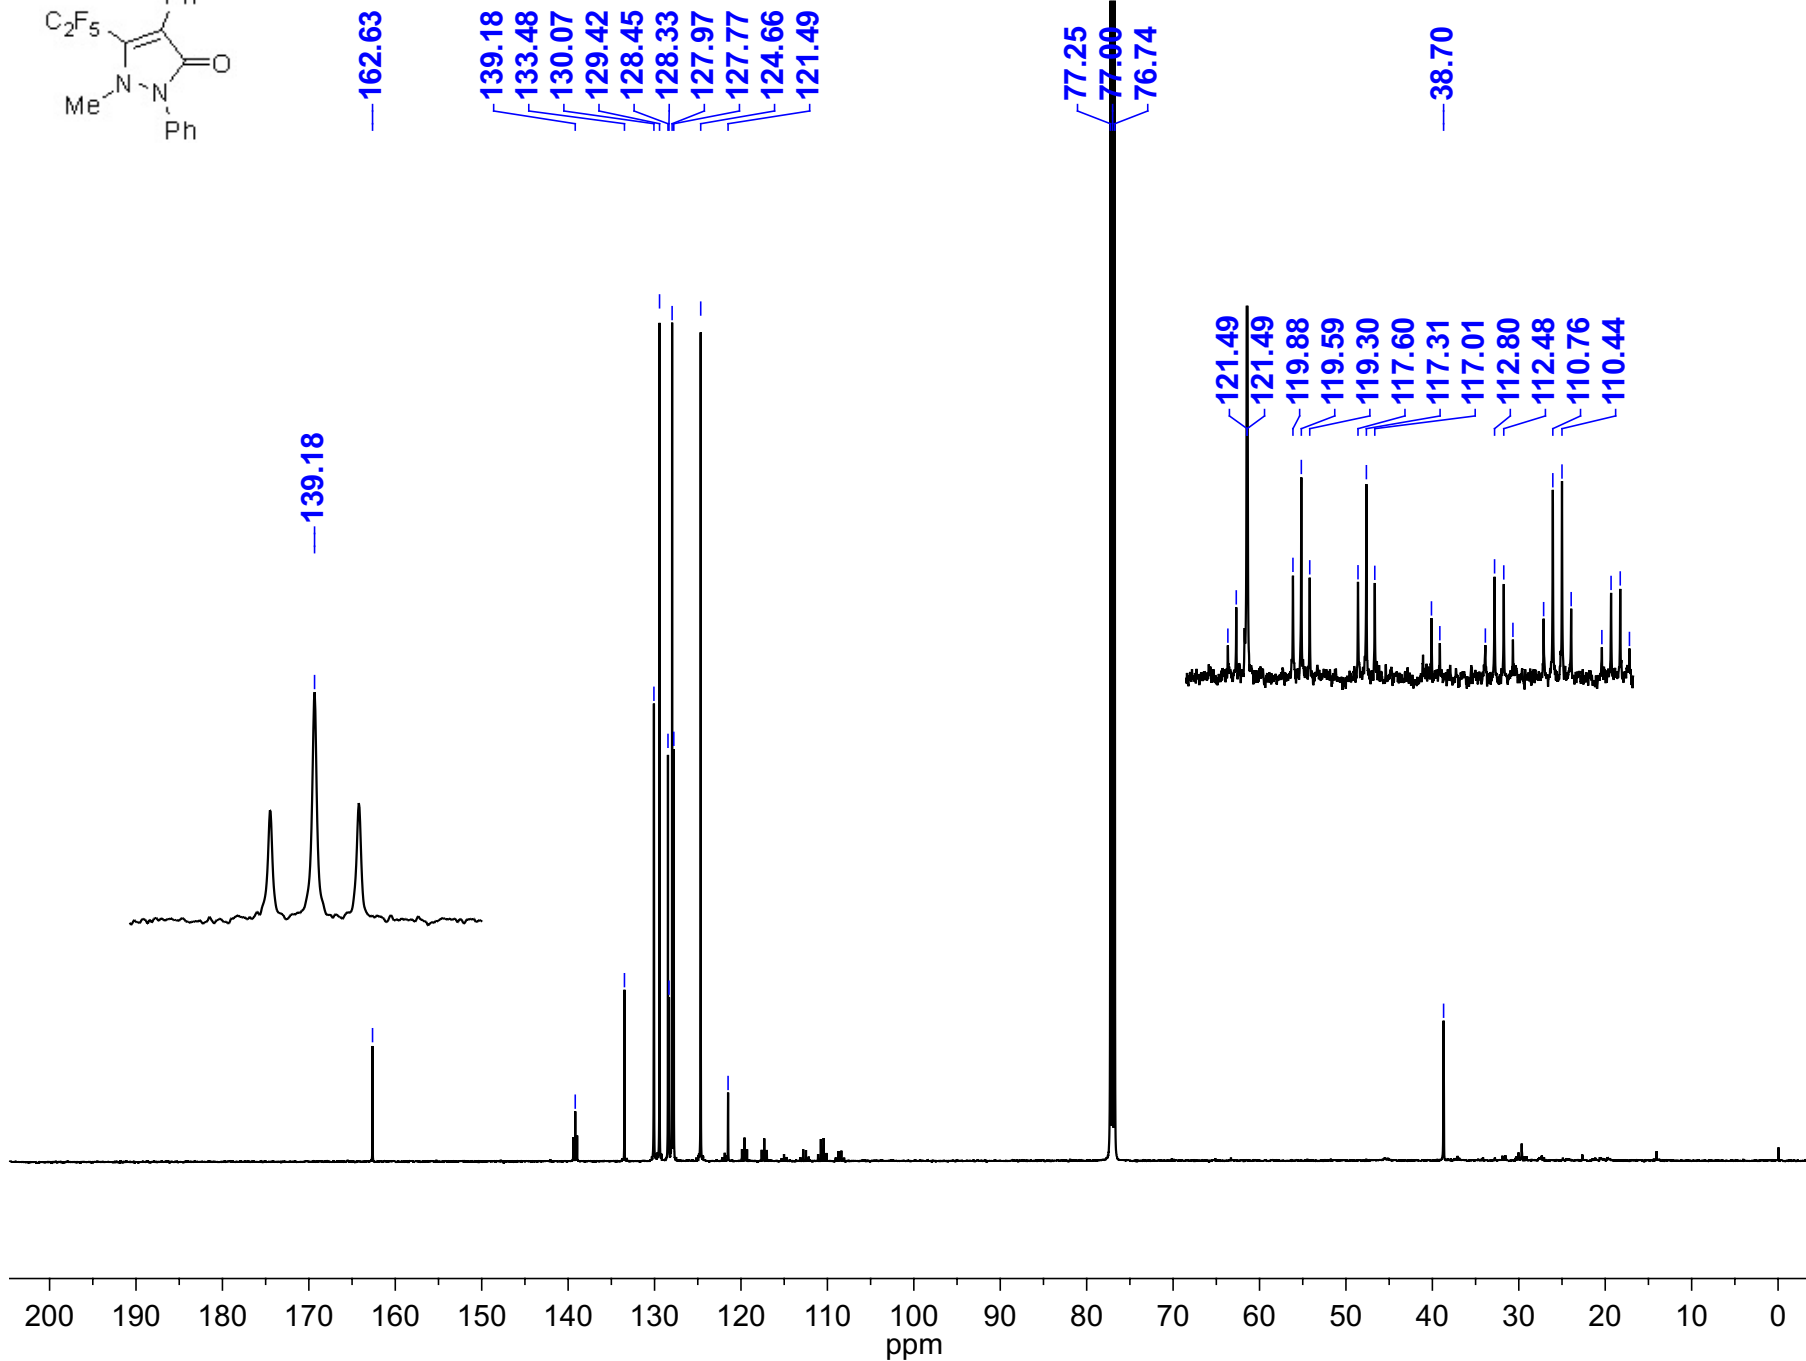

|                      |                 |
|----------------------|-----------------|
| NAME                 | Esh707          |
| EXPNO                | 13              |
| PROCNO               | 1               |
| USER                 | uralnmr         |
| Date_                | 20200211        |
| Time                 | 19.46           |
| INSTRUM              | AV500           |
| PROBHD               | 5 mm PABBO BB-  |
| PULPROG              | zgpg30          |
| SOLVENT              | CDCl3           |
| TD                   | 65536           |
| SW                   | 209.2368 ppm    |
| O1P                  | 100.000 ppm     |
| FIDRES               | 0.401547 Hz     |
| NS                   | 20480           |
| DS                   | 8               |
| AQ                   | 1.2452340 sec   |
| RG                   | 203             |
| TE                   | 296.6 K         |
| DE                   | 6.50 usec       |
| D1                   | 1.00000000 sec  |
| D11                  | 0.03000000 sec  |
| TDO                  | 20              |
| ==== CHANNEL f1 ==== |                 |
| NUC1                 | <sup>13</sup> C |
| P1                   | 9.00 usec       |
| PL1                  | 0.00 dB         |
| PL1W                 | 115.29558563 W  |
| SFO1                 | 125.7703648 MHz |
| ==== CHANNEL f2 ==== |                 |
| CPDPRG2              | waltz16         |
| NUC2                 | <sup>1</sup> H  |
| PCPD2                | 75.00 usec      |
| PL2                  | 120.00 dB       |
| PL12                 | 17.00 dB        |
| PL13                 | 20.00 dB        |
| PL2W                 | 0.00000000 W    |
| PL12W                | 0.40445811 W    |
| PL13W                | 0.20270923 W    |
| SFO2                 | 500.1320005 MHz |
| SI                   | 32768           |
| HZpPT                | 0.803094 Hz     |
| SR                   | 3.36 Hz         |
| WDW                  | EM              |
| LB                   | 1.50 Hz         |
| GB                   | 0               |
| SSB                  | 0               |

<sup>19</sup>C\F NMR spectrum of compound **3h** in CDCl<sub>3</sub>

Current Data Parameters

NAME ESh707  
EXPNO 19  
PROCNO 1  
USER uralhmr

F2 - Acquisition Parameters

Date\_ 20200131  
Time 12.54  
INSTRUM DRX400  
PROBHD 5 mm SEF 19F-1  
PULPROG zg30  
TD 131072  
SOLVENT CDCl<sub>3</sub>  
NS 16  
DS 2  
SWH 37664.785 Hz  
FIDRES 0.287360 Hz  
AQ 1.7400308 sec  
RG 2298.8  
DW 13.275 usec  
DE 6.50 usec  
TE 297.2 K  
D1 1.00000000 sec  
MCREST 0.00000000 sec  
MCWRK 0.01500000 sec  
==== CHANNEL f1 ====  
NUC1 19F  
P1 10.10 usec  
PL1 0.00 dB  
SFO1 376.4523425 MHz

F2 - Processing parameters

SI 131072  
HZpPT 0.287360 Hz  
SF 376.4374855 MHz  
SR 200.54 Hz  
WDW EM  
LB 0.00 Hz  
GB 0  
SSB 0  
PC 3.00

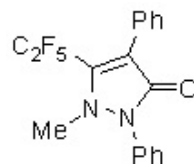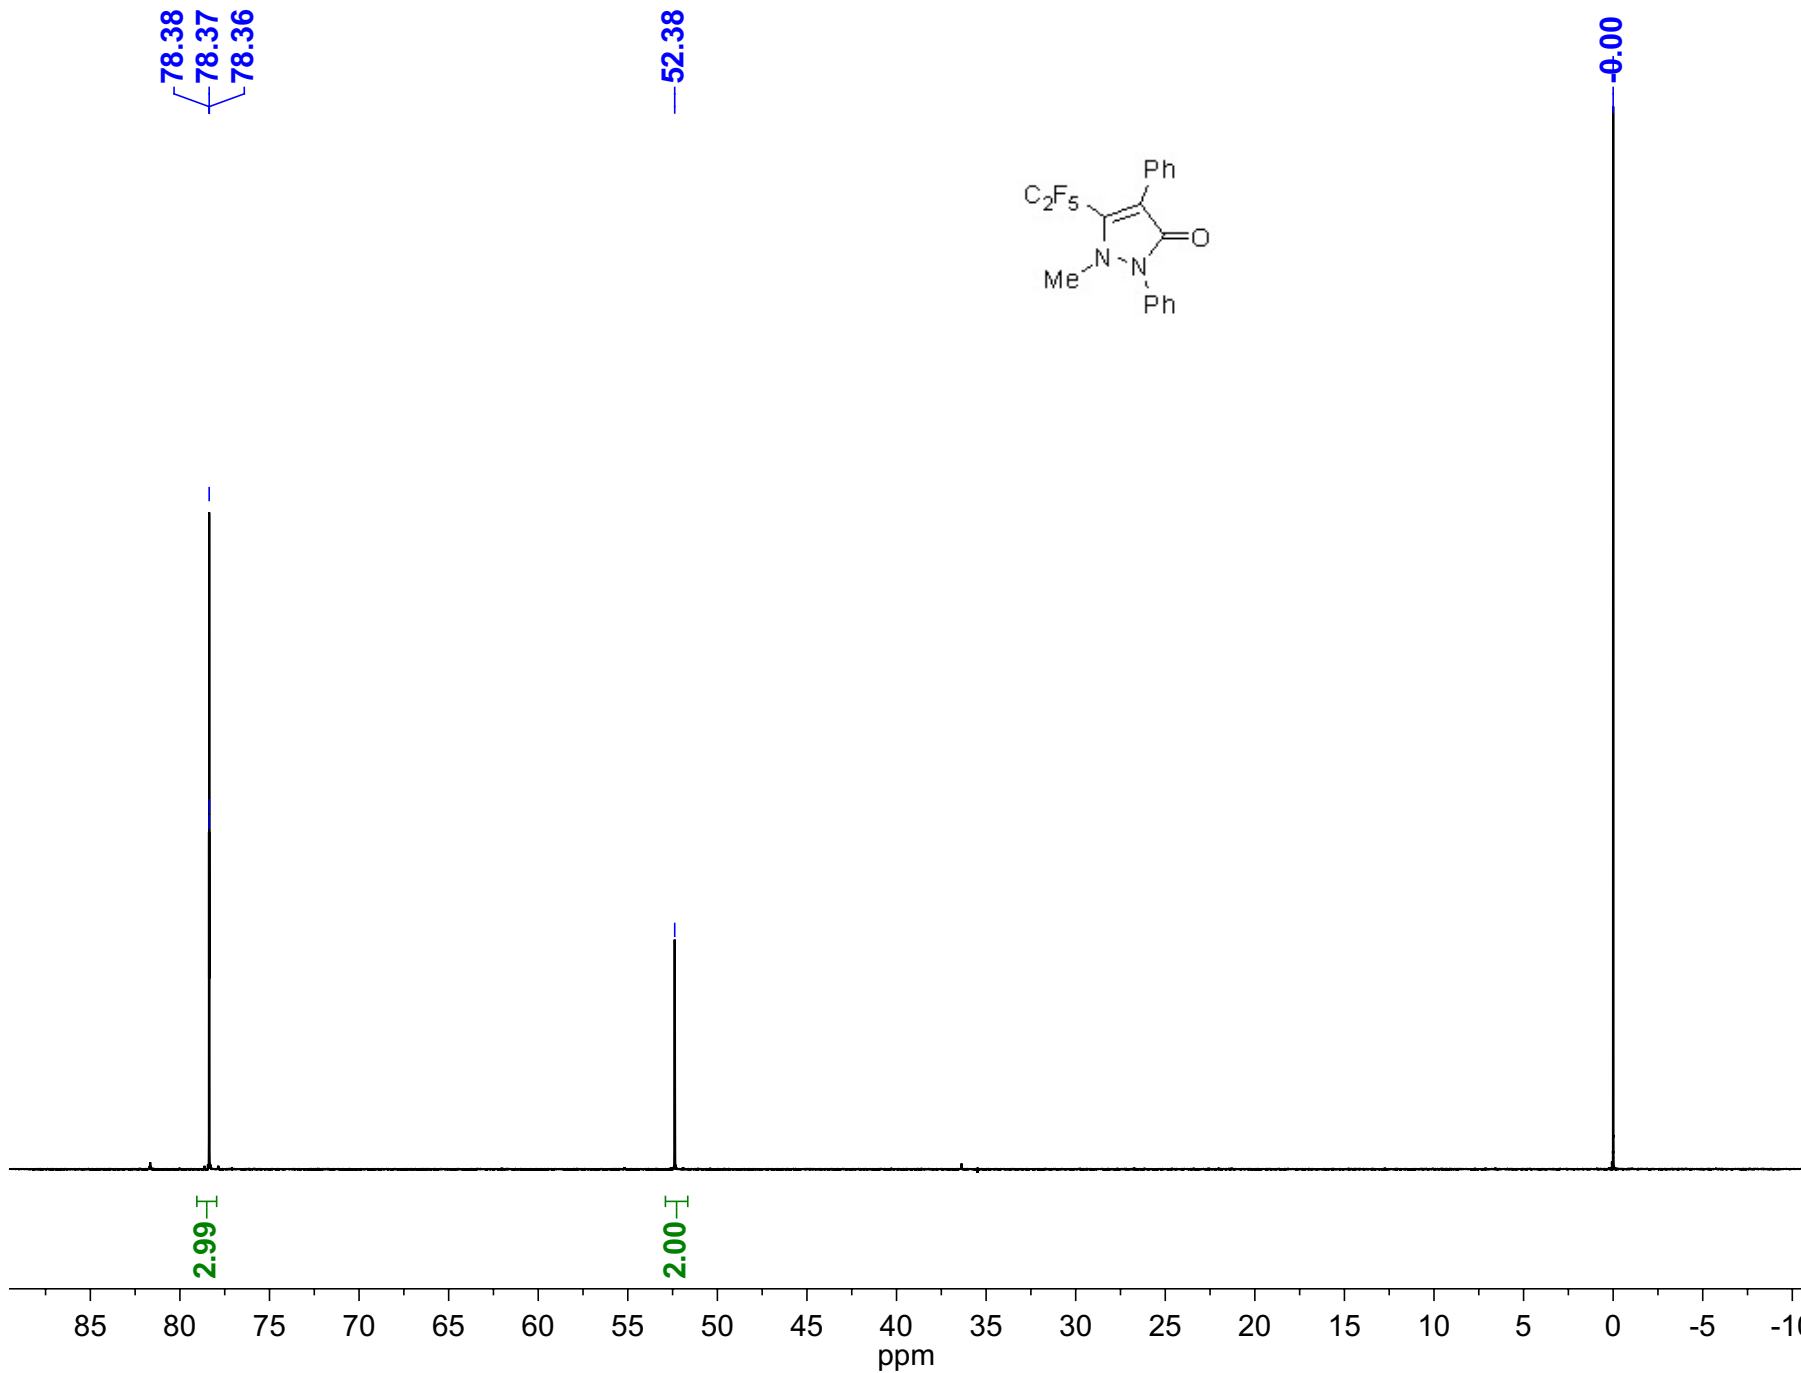

<sup>1</sup>H NMR spectrum of compound **3i** in CDCl<sub>3</sub>

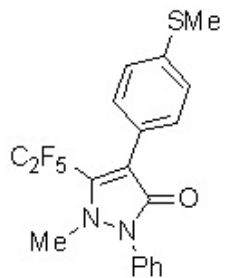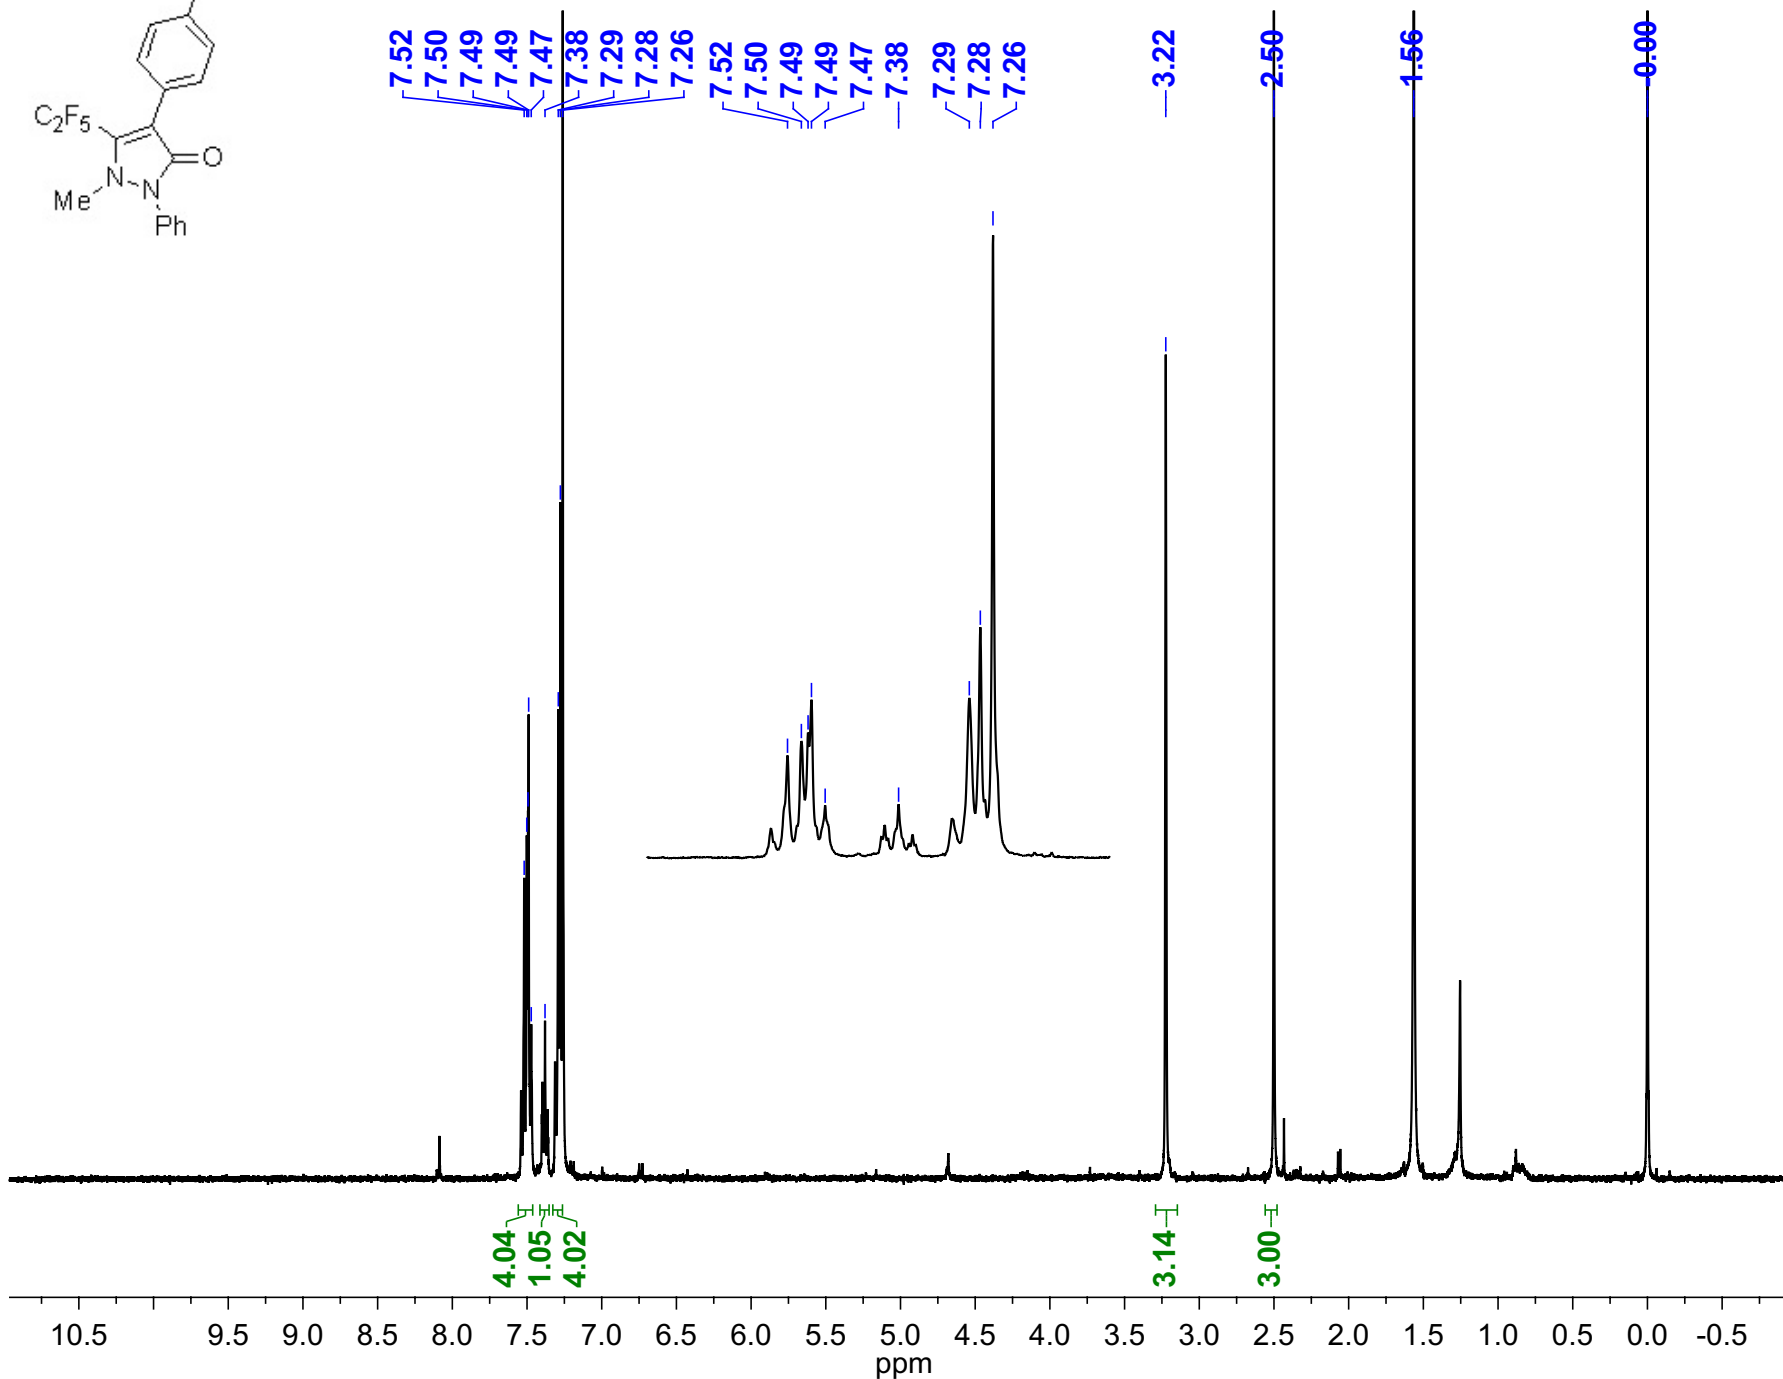

Current Data Parameters

NAME ESh714  
 EXPNO 1  
 PROCNO 1  
 USER uralnmr

F2 - Acquisition Parameters

Date\_ 20200312  
 Time 14.27  
 INSTRUM DRX400  
 PROBHD 5 mm SEF 19F-1  
 PULPROG zg30  
 TD 32768  
 SOLVENT CDCl3  
 NS 16  
 DS 2  
 SWH 4789.272 Hz  
 FIDRES 0.146157 Hz  
 AQ 3.4210291 sec  
 RG 812.7  
 DW 104.400 usec  
 DE 6.00 usec  
 TE 298.2 K  
 D1 1.00000000 sec  
 MCREST 0.00000000 sec  
 MCWRK 0.01500000 sec

==== CHANNEL f1 =====

NUC1 1H  
 P1 20.00 usec  
 PL1 0.00 dB  
 SFO1 400.1320007 MHz

F2 - Processing parameters

SI 32768  
 HZpPT 0.146157 Hz  
 SF 400.1300090 MHz  
 SR 8.97 Hz  
 WDW EM  
 LB 0.00 Hz  
 GB 0  
 SSB 0  
 PC 4.00

<sup>13</sup>C NMR spectrum of compound **3i** in CDCl<sub>3</sub>

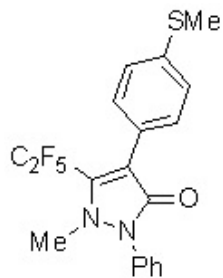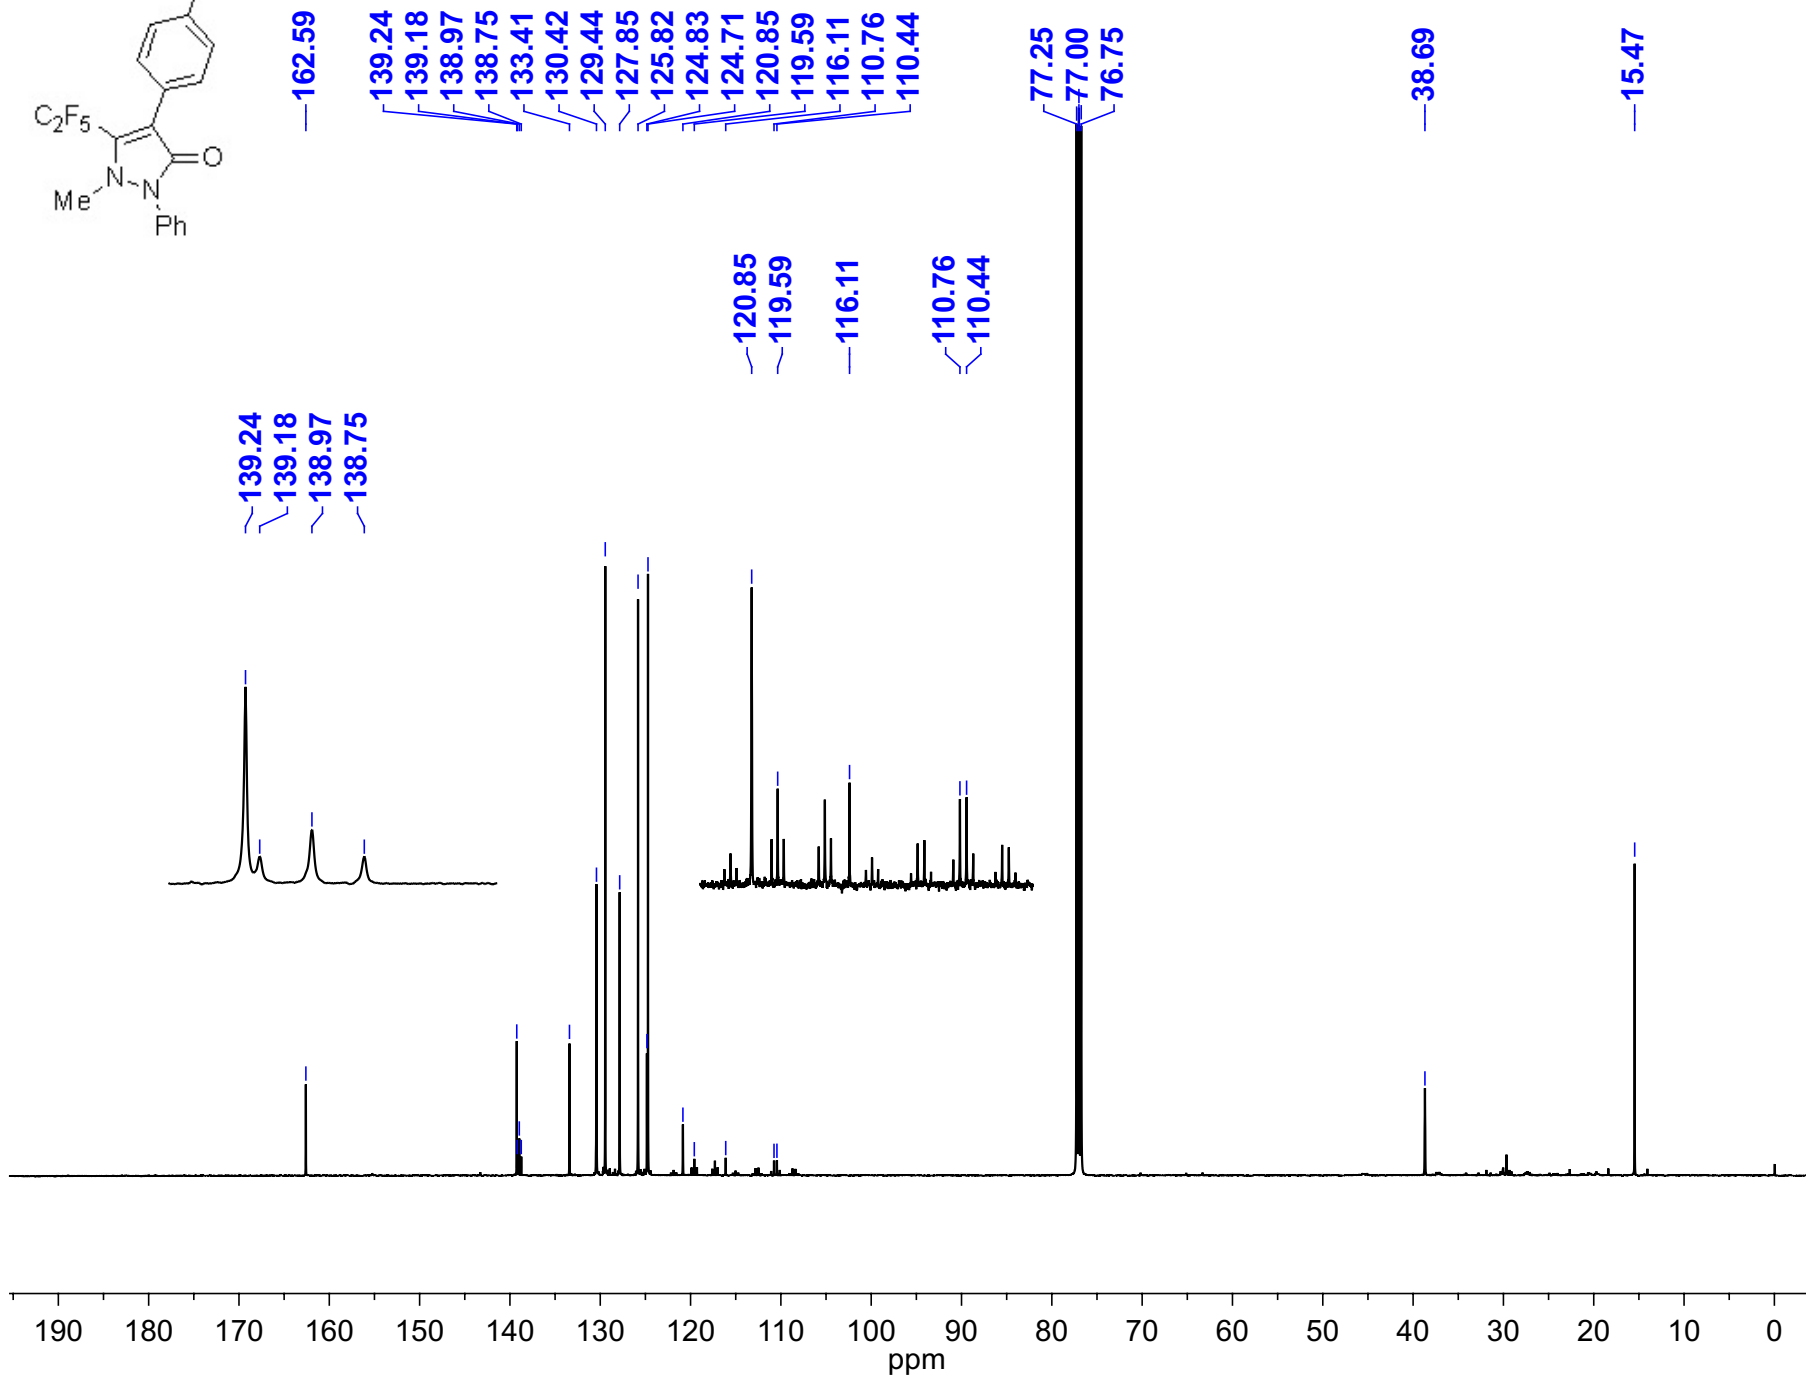

NAME ESh714  
 EXPNO 13  
 PROCNO 1  
 USER uralnmr  
 Date\_ 20200330  
 Time 19.09  
 INSTRUM AV500  
 PROBHD 5 mm PABBO BB-  
 PULPROG zgpg30  
 SOLVENT CDCl3  
 TD 65536  
 SW 200.7838 ppm  
 O1P 95.000 ppm  
 FIDRES 0.385323 Hz  
 NS 32768  
 DS 8  
 AQ 1.2976629 sec  
 RG 203  
 TE 297.2 K  
 DE 6.50 usec  
 D1 1.20000005 sec  
 D11 0.03000000 sec  
 TD0 32

==== CHANNEL f1 =====  
 NUC1 13C  
 P1 9.00 usec  
 PL1 0.00 dB  
 PL1W 115.29558563 W  
 SFO1 125.7697360 MHz

==== CHANNEL f2 =====  
 CPDPRG2 waltz16  
 NUC2 1H  
 PCPD2 75.00 usec  
 PL2 120.00 dB  
 PL12 17.00 dB  
 PL13 20.00 dB  
 PL2W 0.00000000 W  
 PL12W 0.40445811 W  
 PL13W 0.20270923 W  
 SFO2 500.1320005 MHz  
 SI 65536  
 HZpPT 0.385323 Hz  
 SR 3.54 Hz  
 WDW EM  
 LB 1.00 Hz  
 GB 0  
 SSB 0

<sup>19</sup>F NMR spectrum of compound **3i** in CDCl<sub>3</sub>

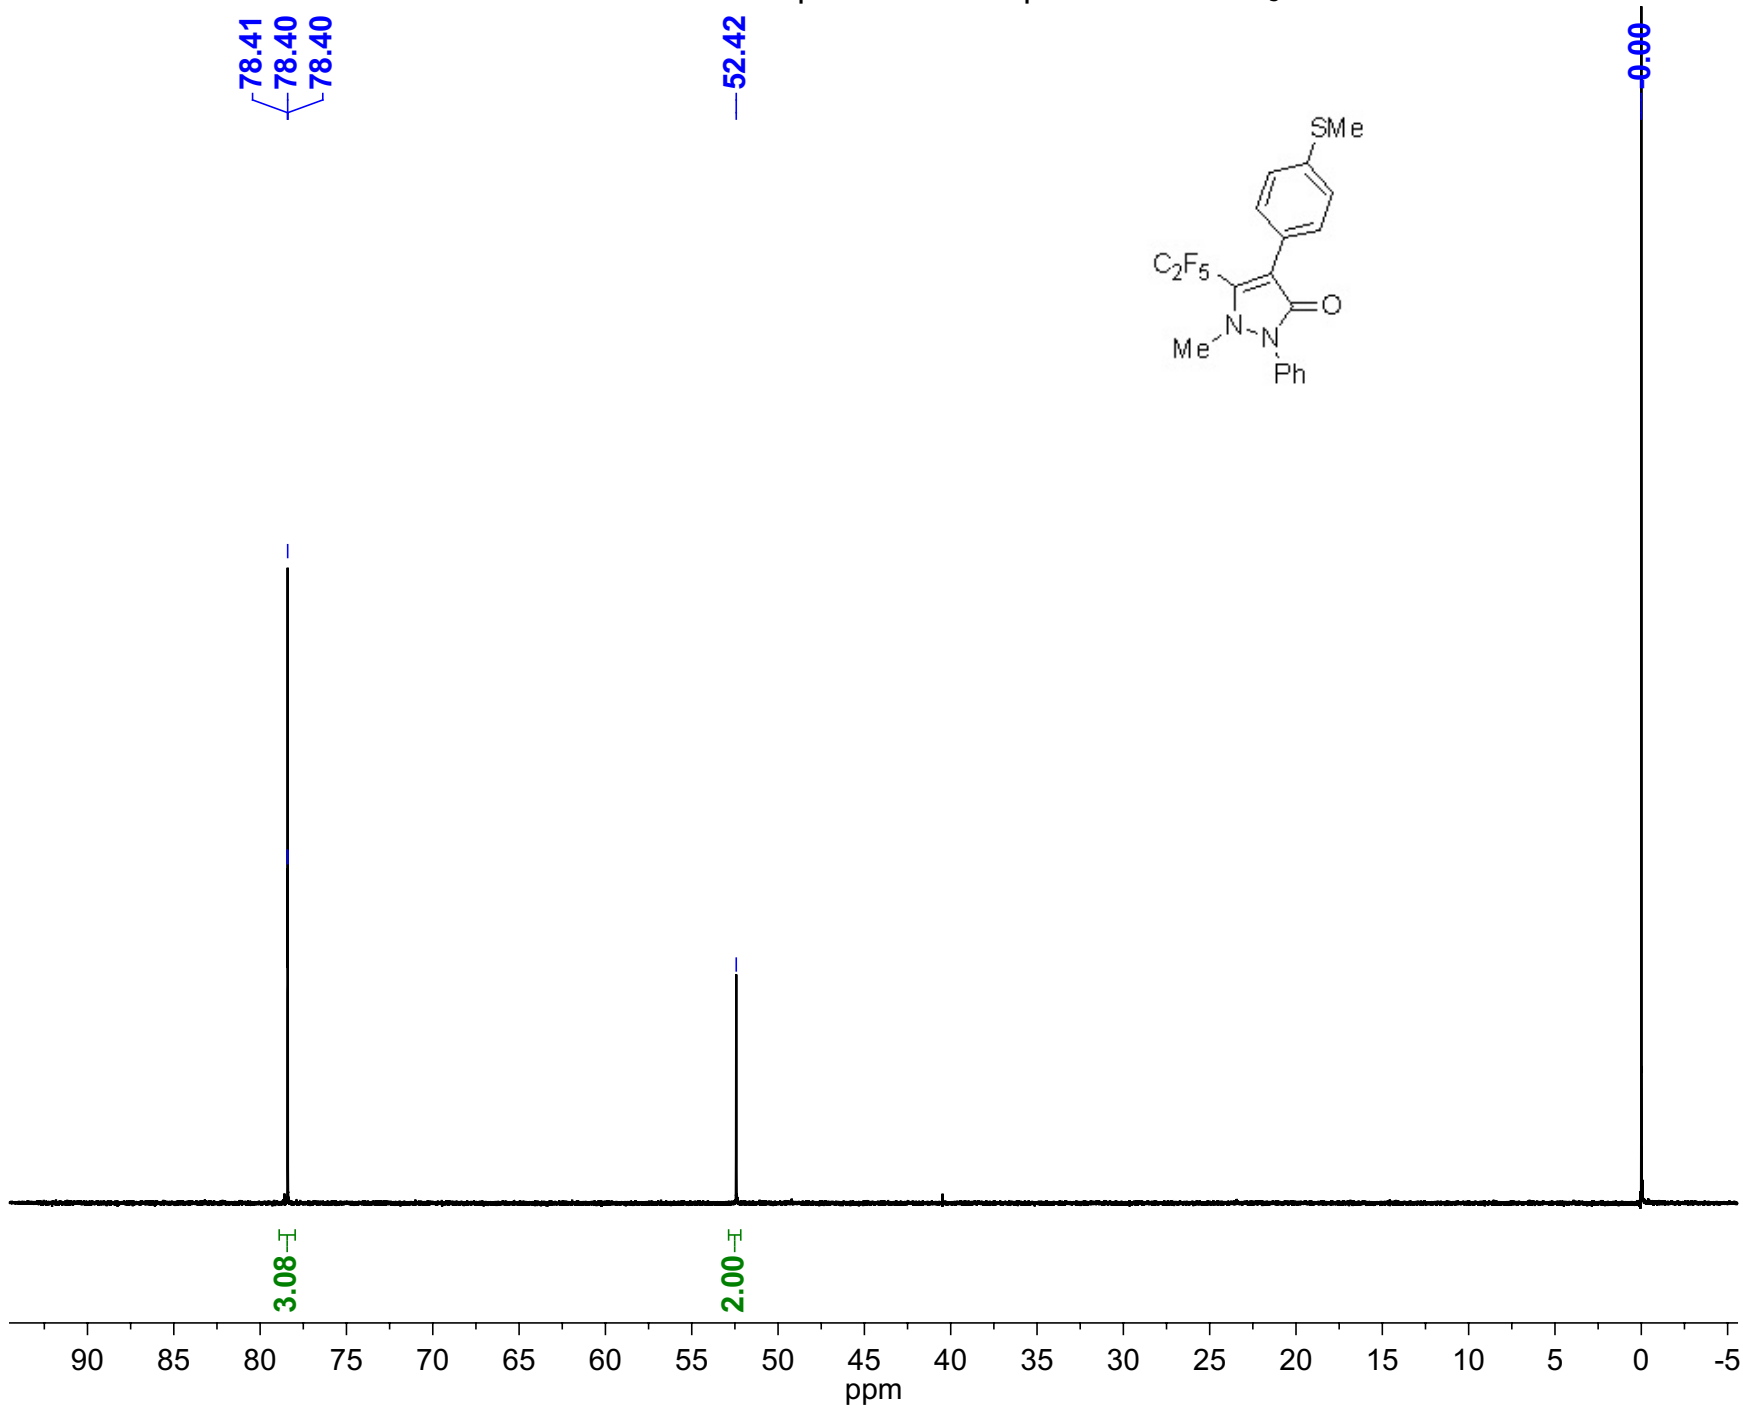

Current Data Parameters

NAME ESh714  
EXPNO 19  
PROCNO 1  
USER uralnmr

F2 - Acquisition Parameters

Date\_ 20200312  
Time 14.32  
INSTRUM DRX400  
PROBHD 5 mm SEF 19F-1  
PULPROG zg30  
TD 131072  
SOLVENT CDCB  
NS 16  
DS 2  
SWH 37664.785 Hz  
FIDRES 0.287360 Hz  
AQ 1.7400308 sec  
RG 2580.3  
DW 13.275 usec  
DE 6.50 usec  
TE 298.2 K  
D1 1.00000000 sec  
MCREST 0.00000000 sec  
MCWRK 0.01500000 sec

==== CHANNEL f1 ====

NUC1 19F  
P1 10.10 usec  
PL1 0.00 dB  
SFO1 376.4542247 MHz

F2 - Processing parameters

SI 131072  
HZpPT 0.287360 Hz  
SF 376.4374841 MHz  
SR 199.13 Hz  
WDW EM  
LB 0.00 Hz  
GB 0  
SSB 0  
PC 3.00

<sup>1</sup>H NMR spectrum of compound **3j** in CDCl<sub>3</sub>

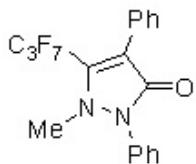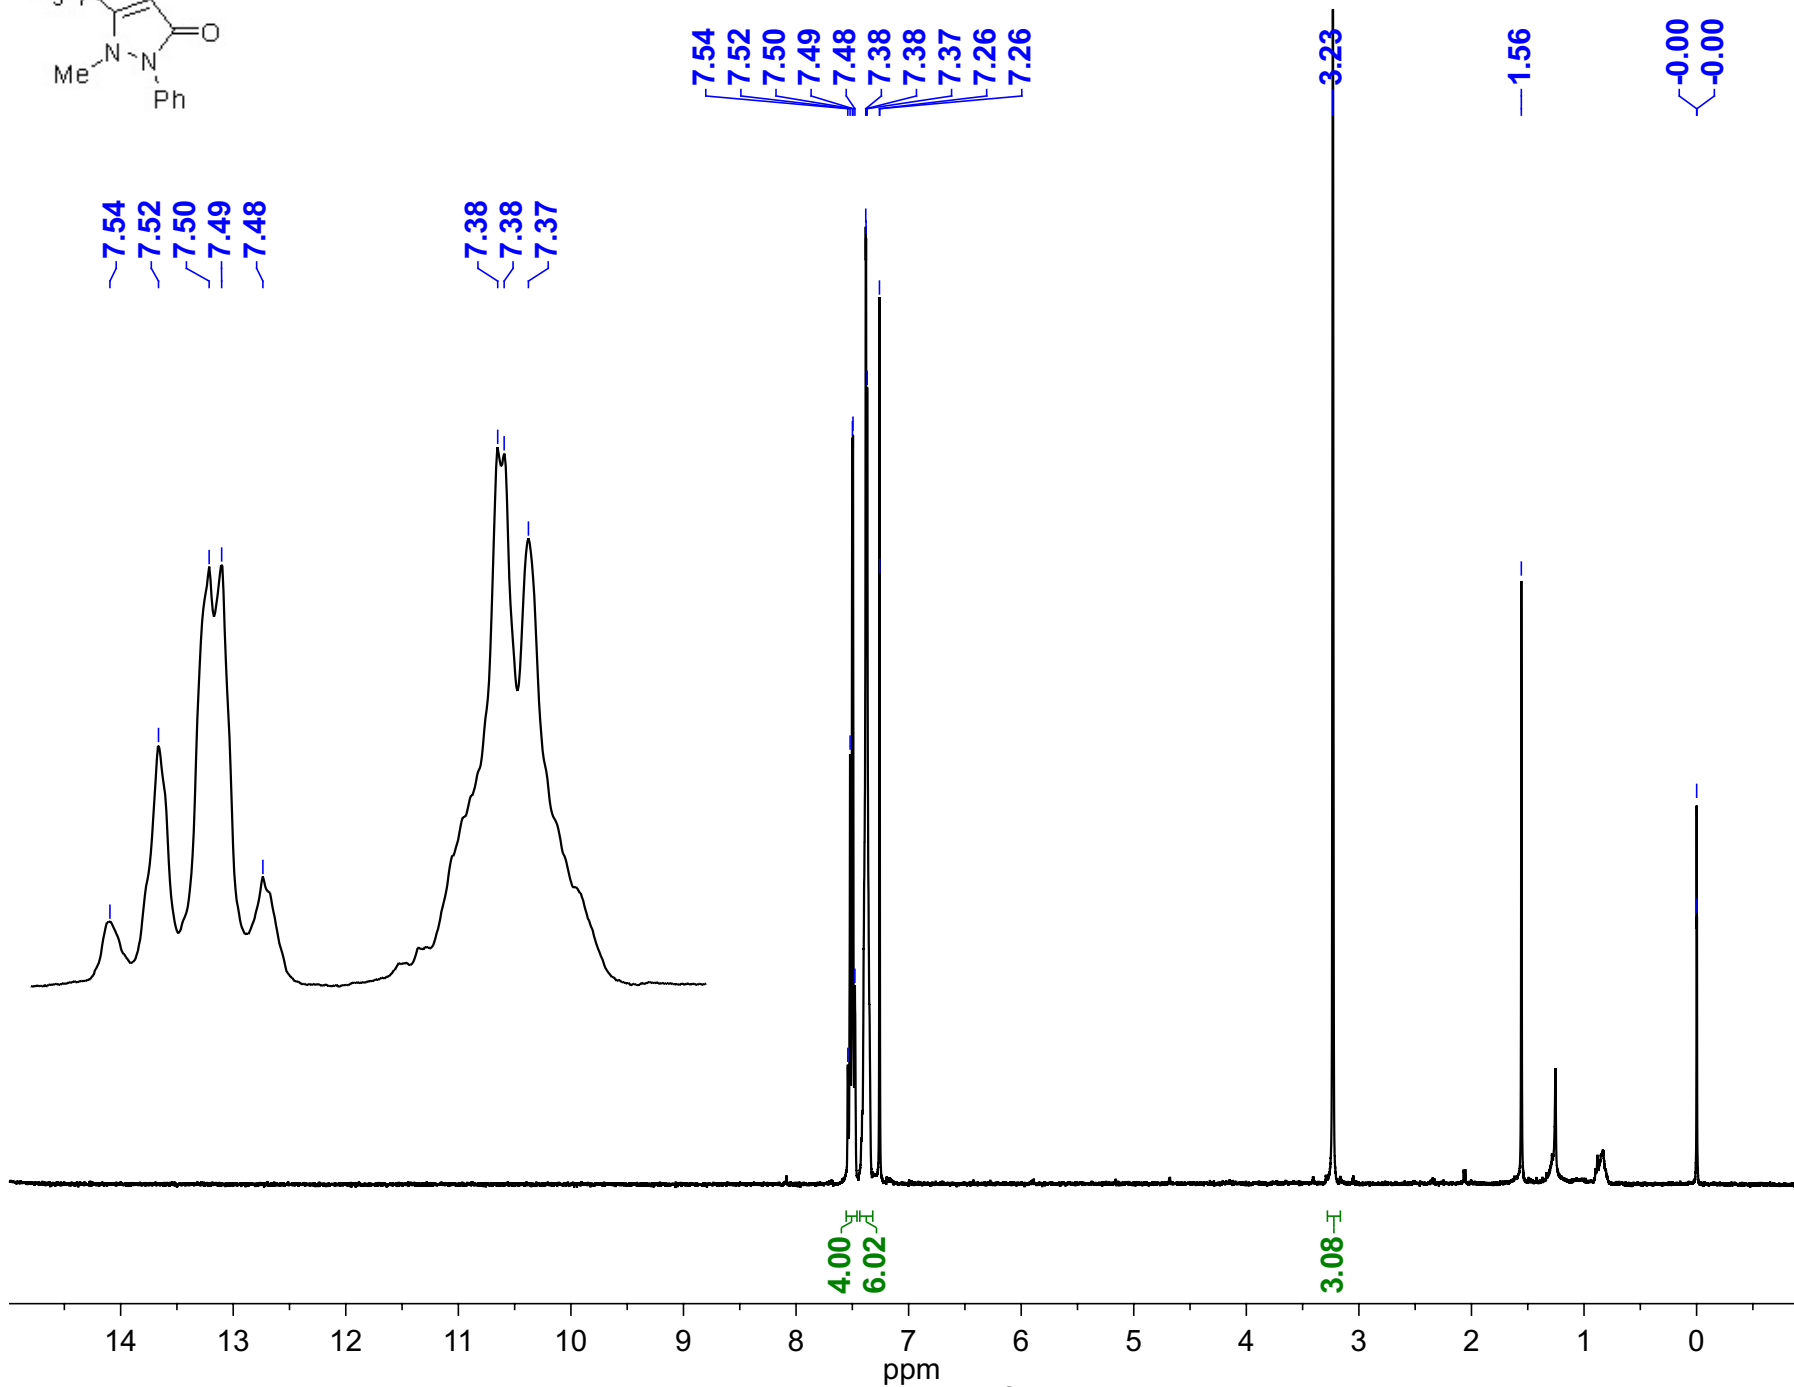

Current Data Parameters

NAME ESh708  
 EXPNO 1  
 PROCNO 1  
 USER uralnmr

F2 - Acquisition Parameters

Date\_ 20200131  
 Time 13.13  
 INSTRUM DRX400  
 PROBHD 5 mm SEF 19F-1  
 PULPROG zg30  
 TD 32768  
 SOLVENT CDCl3  
 NS 16  
 DS 2  
 SWH 6410.256 Hz  
 FIDRES 0.195625 Hz  
 AQ 2.5559540 sec  
 RG 574.7  
 DW 78.000 usec  
 DE 6.00 usec  
 TE 297.2 K  
 D1 1.00000000 sec  
 MCREST 0.00000000 sec  
 MCWRK 0.01500000 sec  
 ===CHANNEL f1 ===  
 NUC1 1H  
 P1 20.00 usec  
 PL1 0.00 dB  
 SFO1 400.1328009 MHz

F2 - Processing parameters

SI 32768  
 HZpPT 0.195625 Hz  
 SF 400.1300102 MHz  
 SR 10.25 Hz  
 WDW EM  
 LB 0.00 Hz  
 GB 0  
 SSB 0  
 PC 4.00



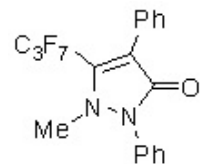

<sup>13</sup>C NMR spectrum of compound **3j** in CDCl<sub>3</sub>

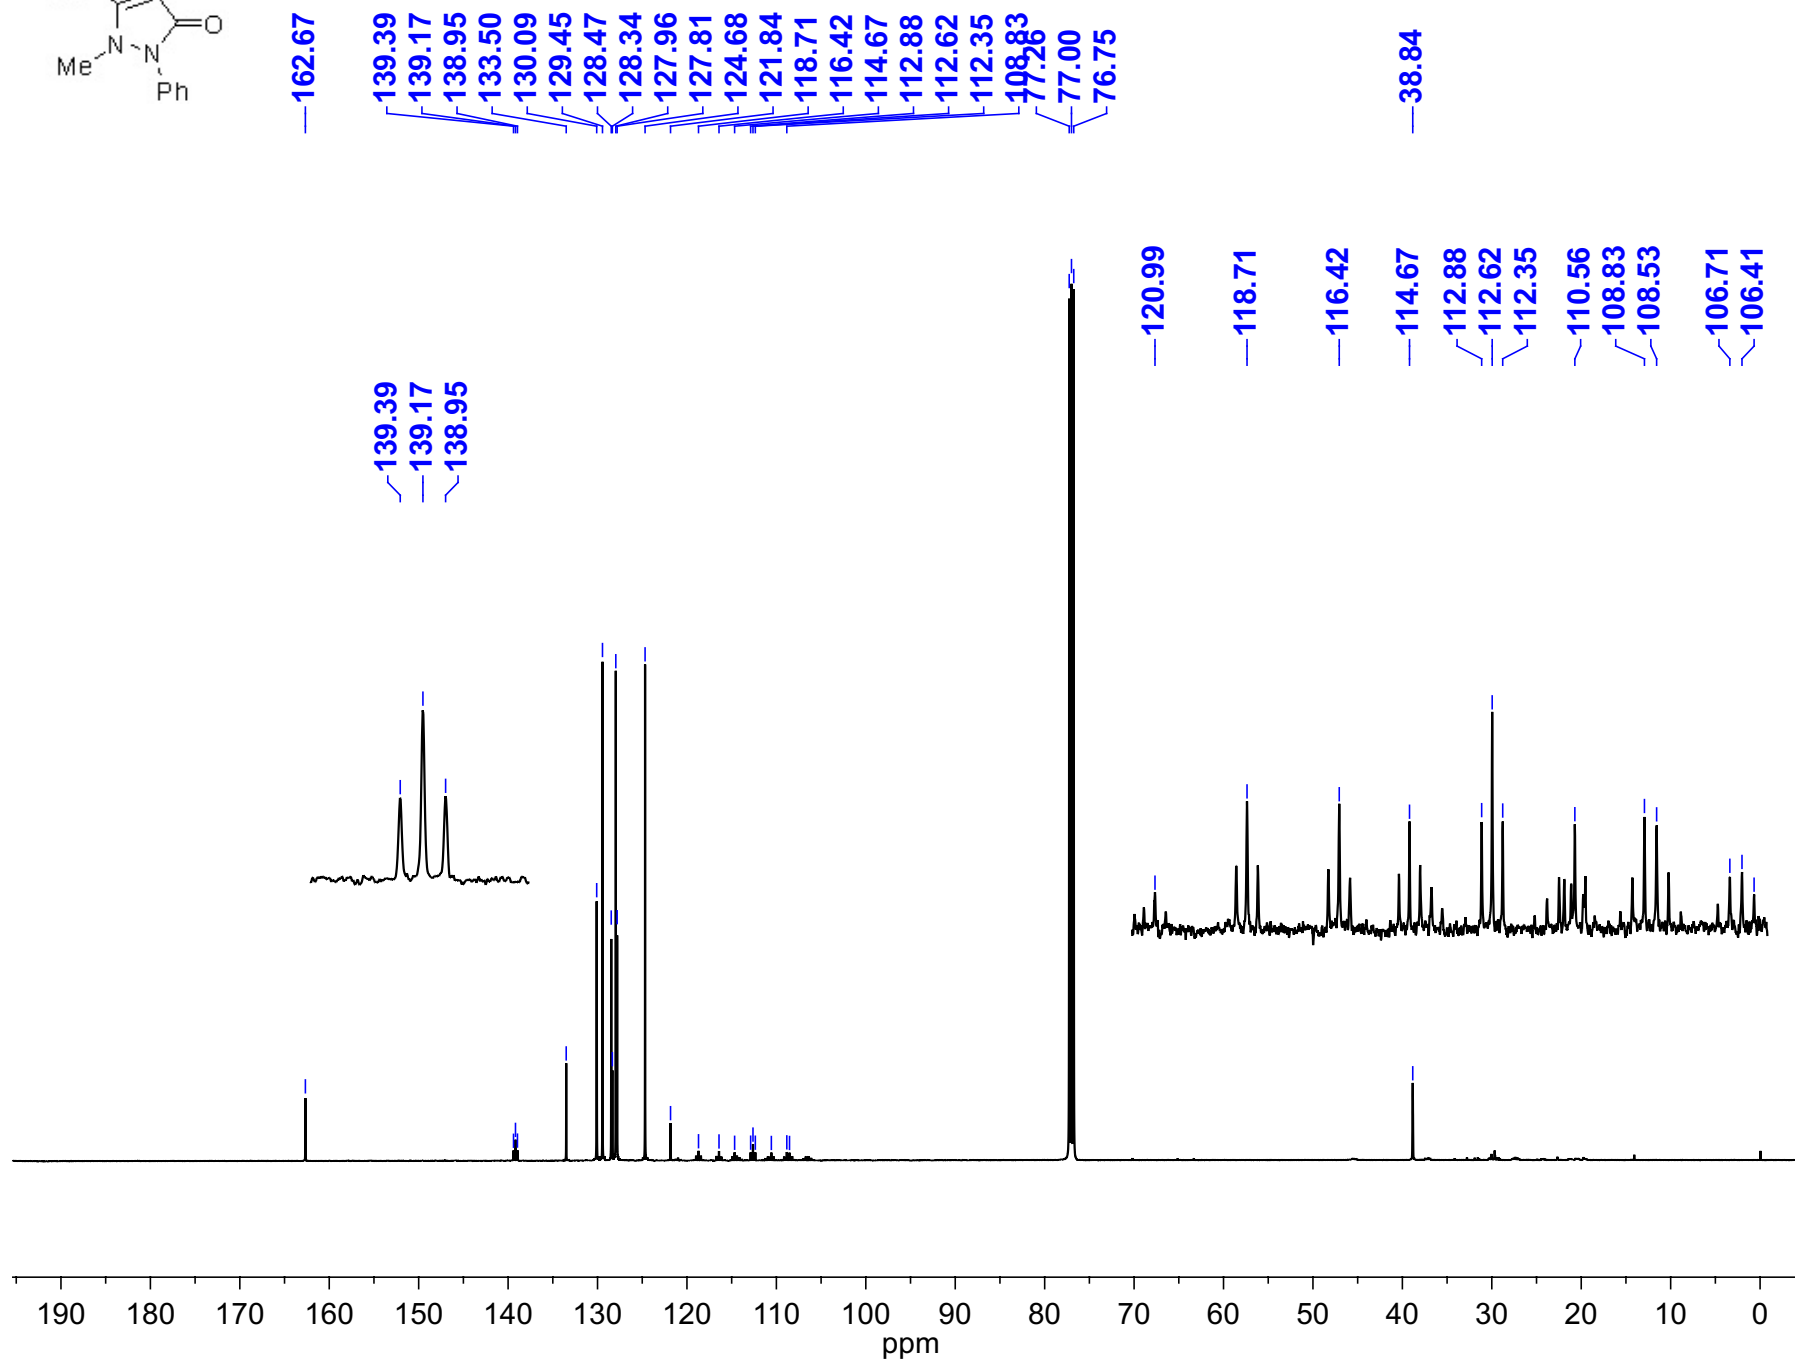

|                       |                 |
|-----------------------|-----------------|
| NAME                  | ESh708          |
| EXPNO                 | 13              |
| PROCNO                | 1               |
| USER                  | uralnmr         |
| Date_                 | 20200210        |
| Time                  | 17.43           |
| INSTRUM               | AV500           |
| PROBHD                | 5 mm PABBO BB-  |
| PULPROG               | zgpg30          |
| SOLVENT               | CDCl3           |
| TD                    | 32768           |
| SW                    | 200.7838 ppm    |
| O1P                   | 95.000 ppm      |
| FIDRES                | 0.770646 Hz     |
| NS                    | 32768           |
| DS                    | 8               |
| AQ                    | 0.6488564 sec   |
| RG                    | 203             |
| TE                    | 295.9 K         |
| DE                    | 6.50 usec       |
| D1                    | 1.00000000 sec  |
| D11                   | 0.03000000 sec  |
| TD0                   | 32              |
| ==== CHANNEL f1 ===== |                 |
| NUC1                  | 13C             |
| P1                    | 9.00 usec       |
| PL1                   | 0.00 dB         |
| PL1W                  | 115.29558563 W  |
| SFO1                  | 125.7697360 MHz |
| ==== CHANNEL f2 ===== |                 |
| CPDPRG2               | waltz16         |
| NUC2                  | 1H              |
| PCPD2                 | 75.00 usec      |
| PL2                   | 120.00 dB       |
| PL12                  | 17.00 dB        |
| PL13                  | 20.00 dB        |
| PL2W                  | 0.00000000 W    |
| PL12W                 | 0.40445811 W    |
| PL13W                 | 0.20270923 W    |
| SFO2                  | 500.1320005 MHz |
| SI                    | 32768           |
| HZpPT                 | 0.770646 Hz     |
| SR                    | 2.16 Hz         |
| WDW                   | EM              |
| LB                    | 1.50 Hz         |
| GB                    | 0               |
| SSB                   | 0               |

<sup>19</sup>F NMR spectrum of compound **3j** in CDCl<sub>3</sub>

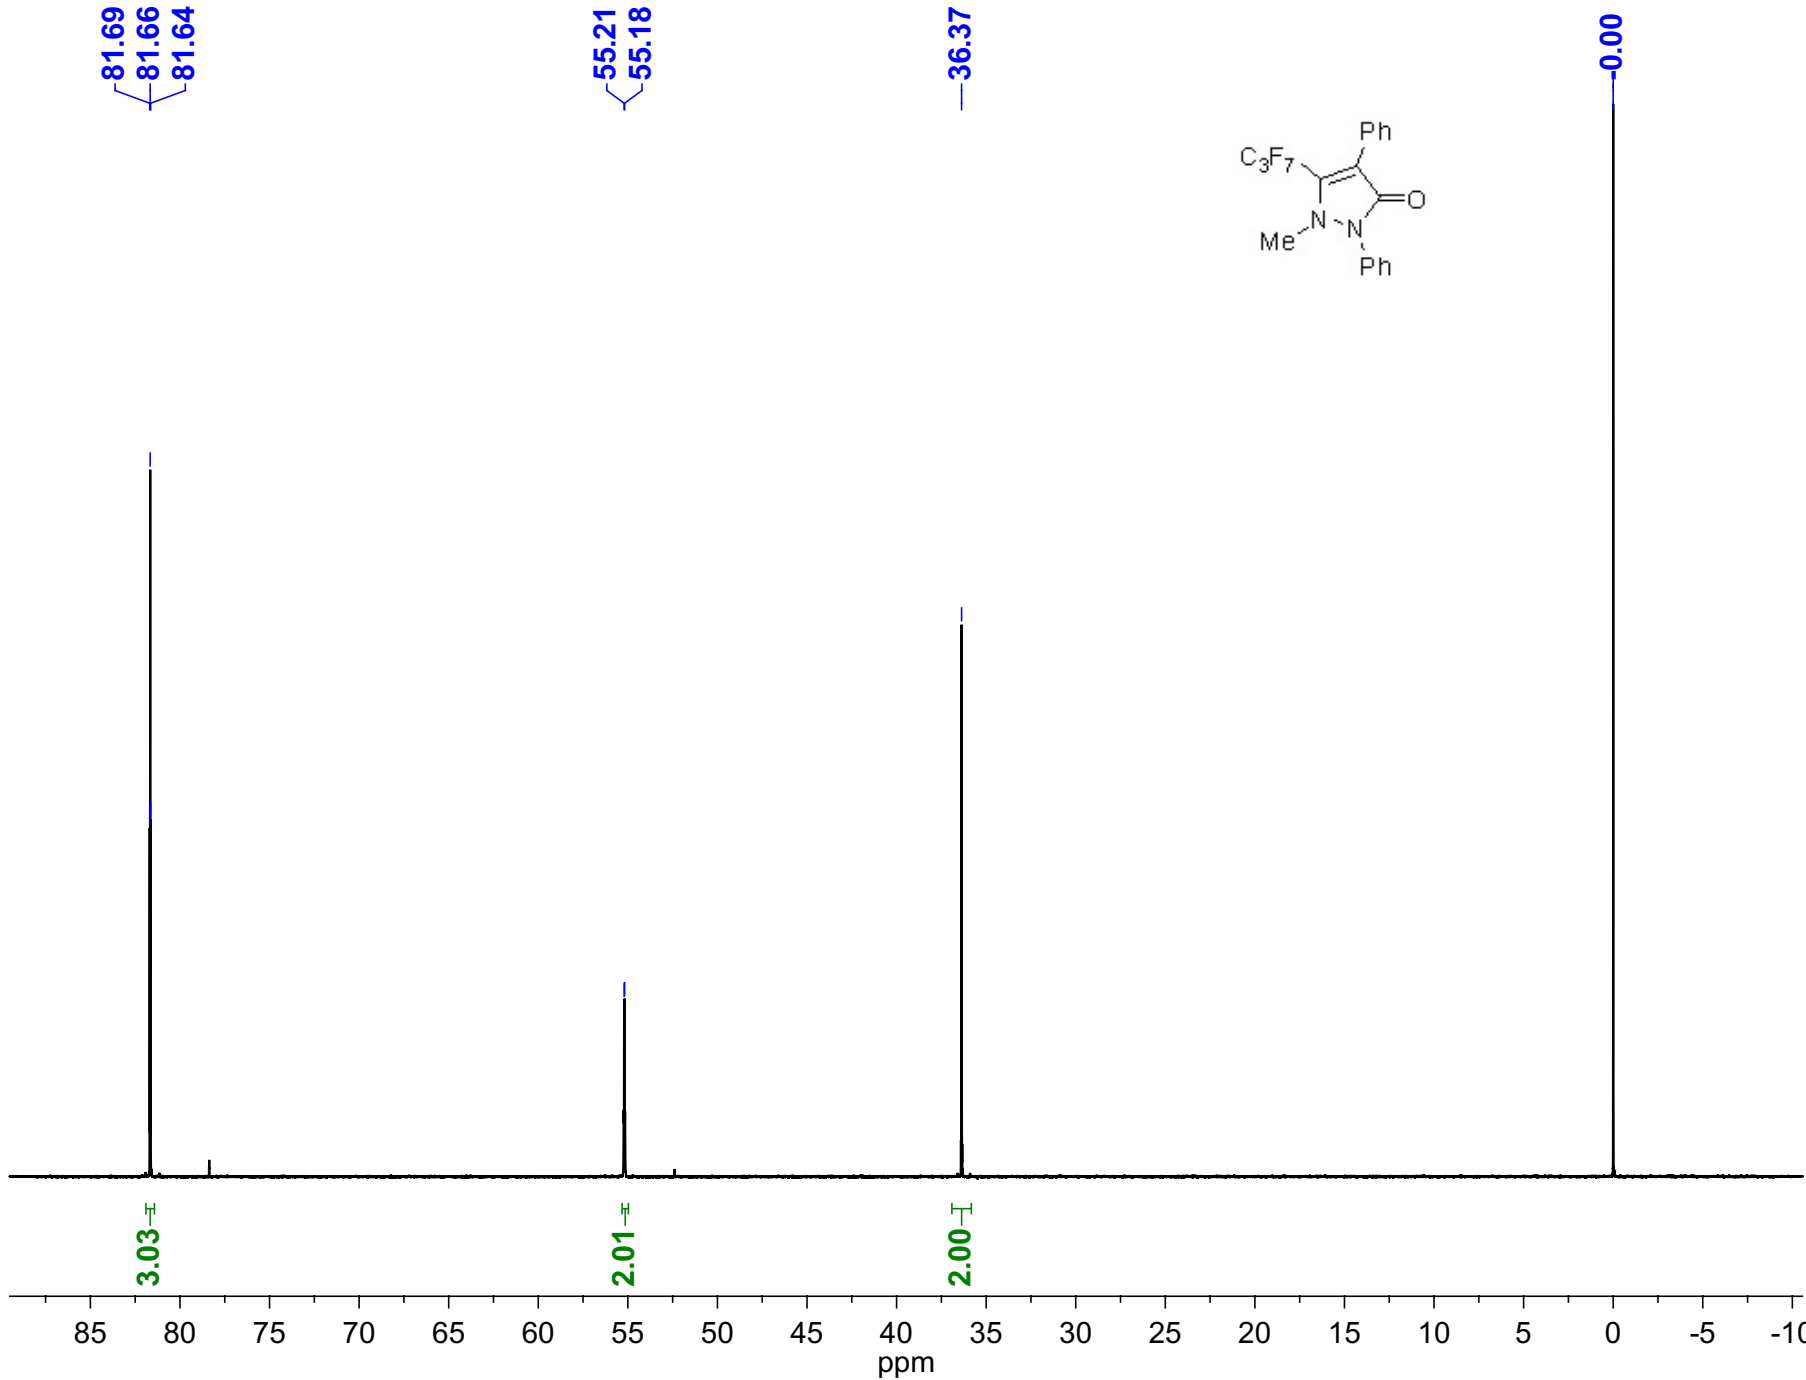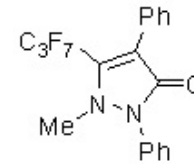

Current Data Parameters

NAME ESh708  
EXPNO 19  
PROCNO 1  
USER urahmr

F2 - Acquisition Parameters

Date\_ 20200131  
Time 13.17  
INSTRUM DRX400  
PROBHD 5 mm SEF 19F-1  
PULPROG zg30  
TD 131072  
SOLVENT CDCl3  
NS 16  
DS 2  
SWH 37664.785 Hz  
FIDRES 0.287360 Hz  
AQ 1.7400308 sec  
RG 2298.8  
DW 13.275 usec  
DE 6.50 usec  
TE 297.2 K  
D1 1.00000000 sec  
MCREST 0.00000000 sec  
MCWRK 0.01500000 sec  
==== CHANNEL f1 =====  
NUC1 19F  
P1 10.10 usec  
PL1 0.00 dB  
SFO1 376.4523425 MHz

F2 - Processing parameters

SI 131072  
HZpPT 0.287360 Hz  
SF 376.4374848 MHz  
SR 199.78 Hz  
WDW EM  
LB 0.00 Hz  
GB 0  
SSB 0  
PC 3.00

<sup>1</sup>H NMR spectrum of compound **3k** in CDCl<sub>3</sub>

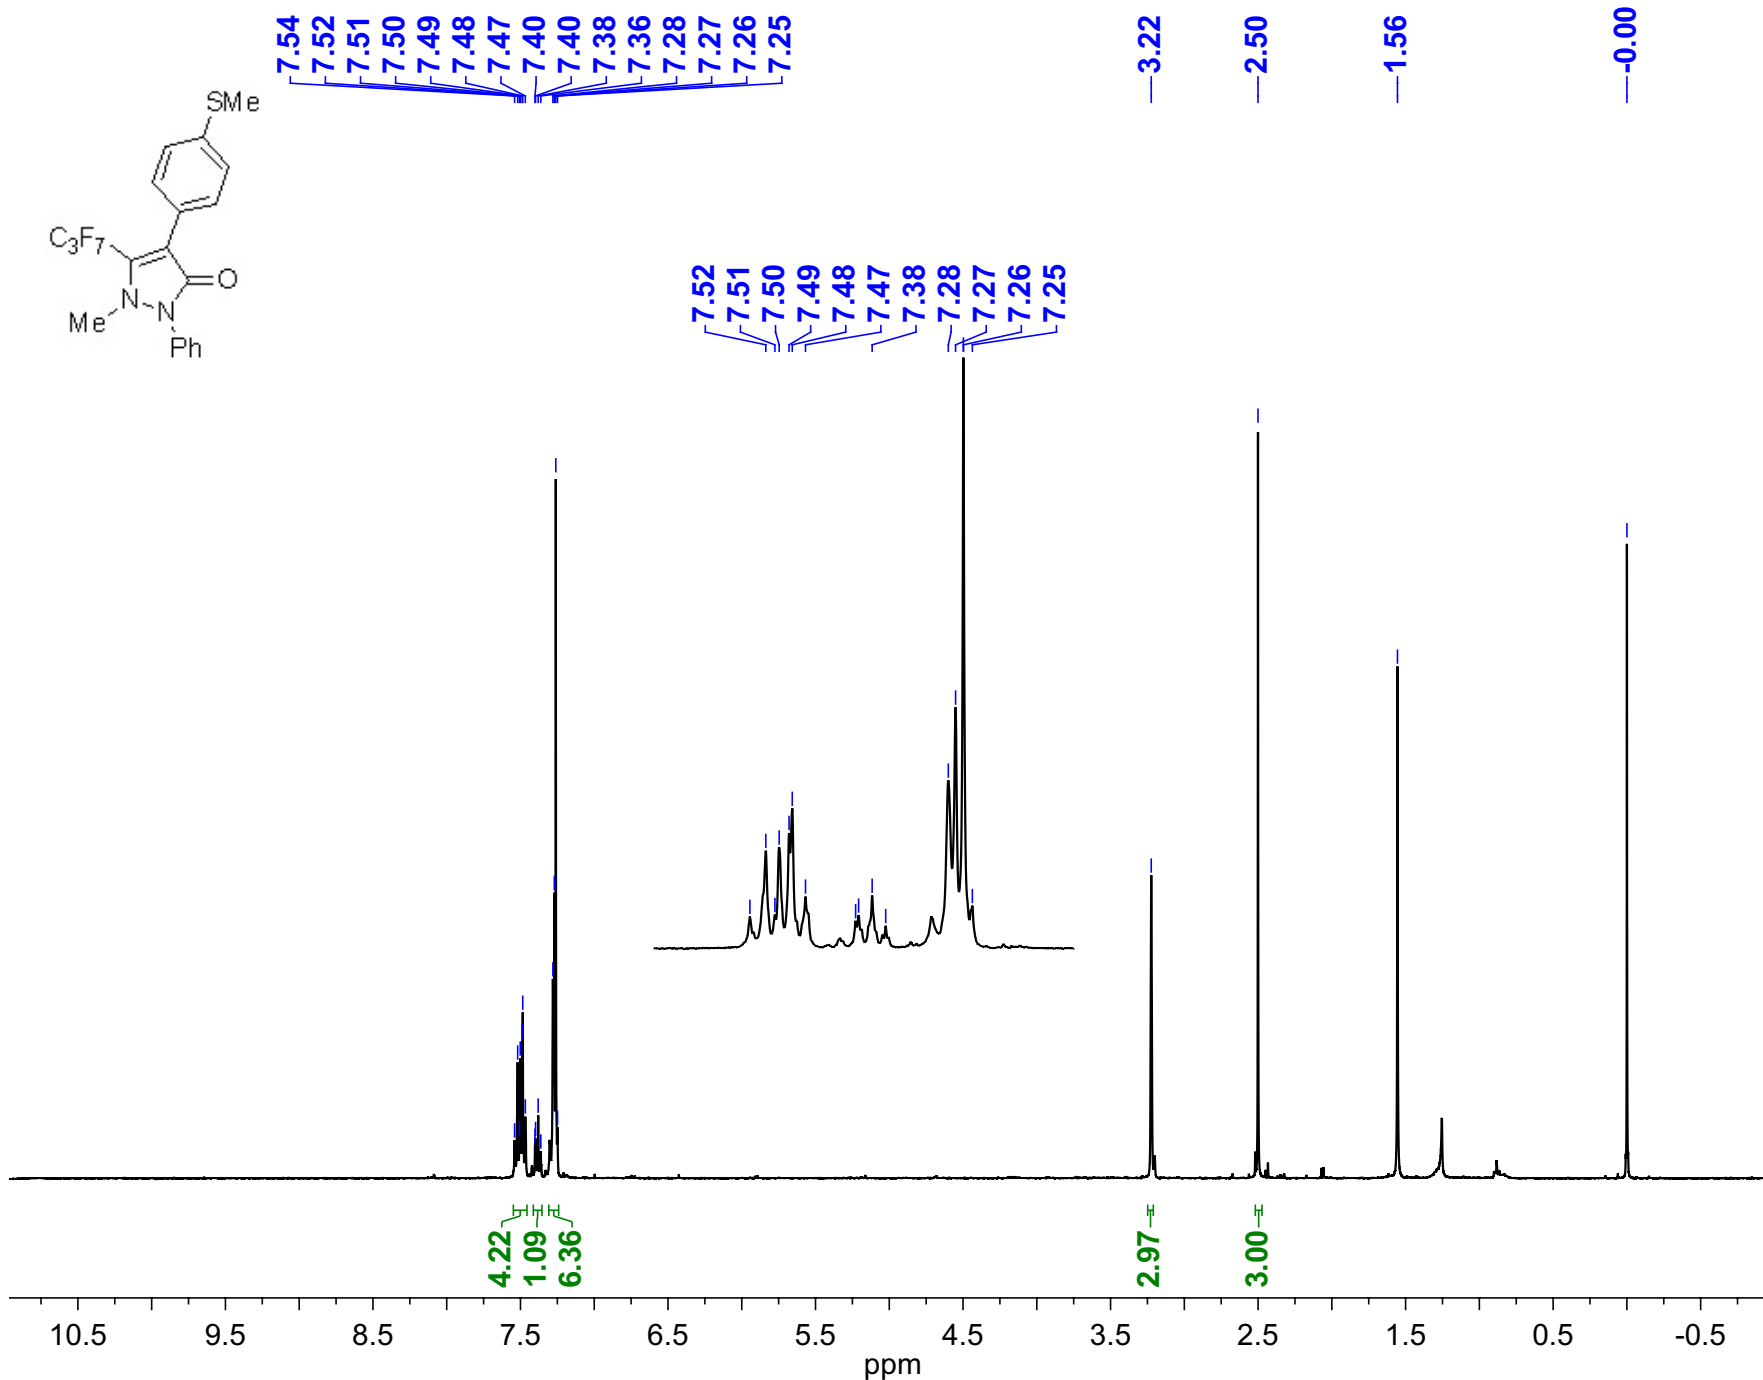

Current Data Parameters

NAME ESh715  
EXPNO 1  
PROCNO 1  
USER uralnmr

F2 - Acquisition Parameters

Date\_ 20200312  
Time 14.39  
INSTRUM DRX400  
PROBHD 5 mm SEF 19F-1  
PULPROG zg30  
TD 32768  
SOLVENT CDCl3  
NS 16  
DS 2  
SWH 4789.272 Hz  
FIDRES 0.146157 Hz  
AQ 3.4210291 sec  
RG 812.7  
DW 104.400 usec  
DE 6.00 usec  
TE 298.2 K  
D1 1.00000000 sec  
MCREST 0.00000000 sec  
MCWRK 0.01500000 sec

==== CHANNEL f1 ====

NUC1 1H  
P1 20.00 usec  
PL1 0.00 dB  
SFO1 400.1320007 MHz

F2 - Processing parameters

SI 32768  
HZpPT 0.146157 Hz  
SF 400.1300092 MHz  
SR 9.23 Hz  
WDW EM  
LB 0.00 Hz  
GB 0  
SSB 0  
PC 4.00

<sup>13</sup>C NMR spectrum of compound **3k** in CDCl<sub>3</sub>

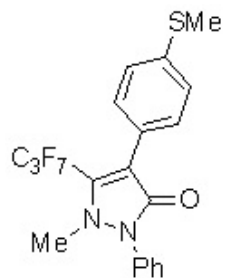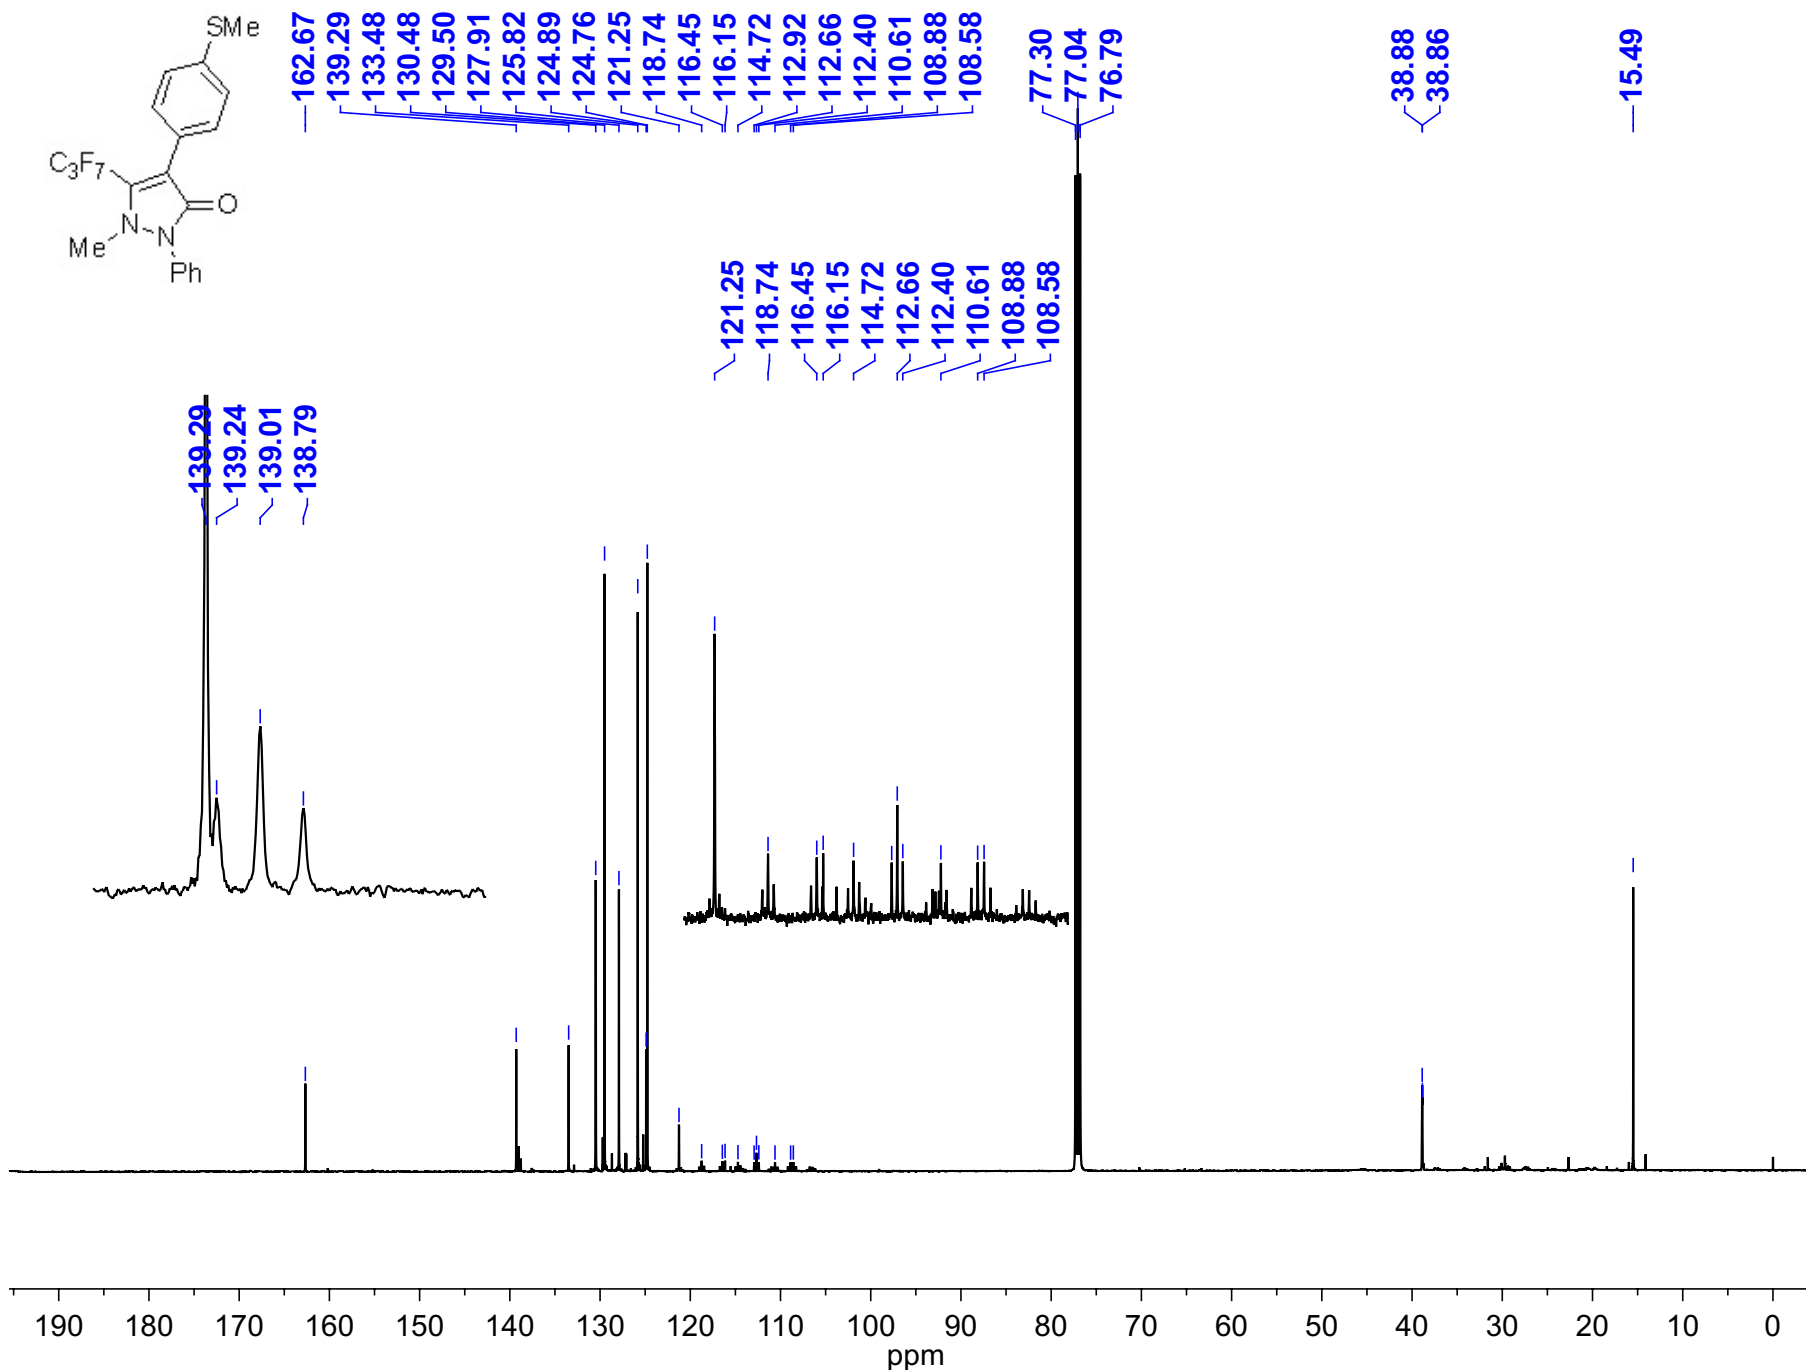

NAME ESh715  
 EXPNO 13  
 PROCNO 1  
 USER uralnmr  
 Date\_ 20200325  
 Time 19.03  
 INSTRUM AV500  
 PROBHD 5 mm PABBO BB-  
 PULPROG zgpg30  
 SOLVENT CDCl3  
 TD 32768  
 SW 200.7838 ppm  
 O1P 95.000 ppm  
 FIDRES 0.770646 Hz  
 NS 30720  
 DS 8  
 AQ 0.6488564 sec  
 RG 203  
 TE 296.6 K  
 DE 6.50 usec  
 D1 1.00000000 sec  
 D11 0.03000000 sec  
 TD0 30

==== CHANNEL f1 =====  
 NUC1 13C  
 P1 9.00 usec  
 PL1 0.00 dB  
 PL1W 115.29558563 W  
 SFO1 125.7697360 MHz

==== CHANNEL f2 =====  
 CPDPRG2 waltz16  
 NUC2 1H  
 PCPD2 75.00 usec  
 PL2 120.00 dB  
 PL12 17.00 dB  
 PL13 20.00 dB  
 PL2W 0.00000000 W  
 PL12W 0.40445811 W  
 PL13W 0.20270923 W  
 SFO2 500.1320005 MHz  
 SI 65536  
 HZpPT 0.385323 Hz  
 SR -2.56 Hz  
 WDW EM  
 LB 1.00 Hz  
 GB 0  
 SSB 0

<sup>13</sup>C NMR spectrum of compound **3k** in CDCl<sub>3</sub>

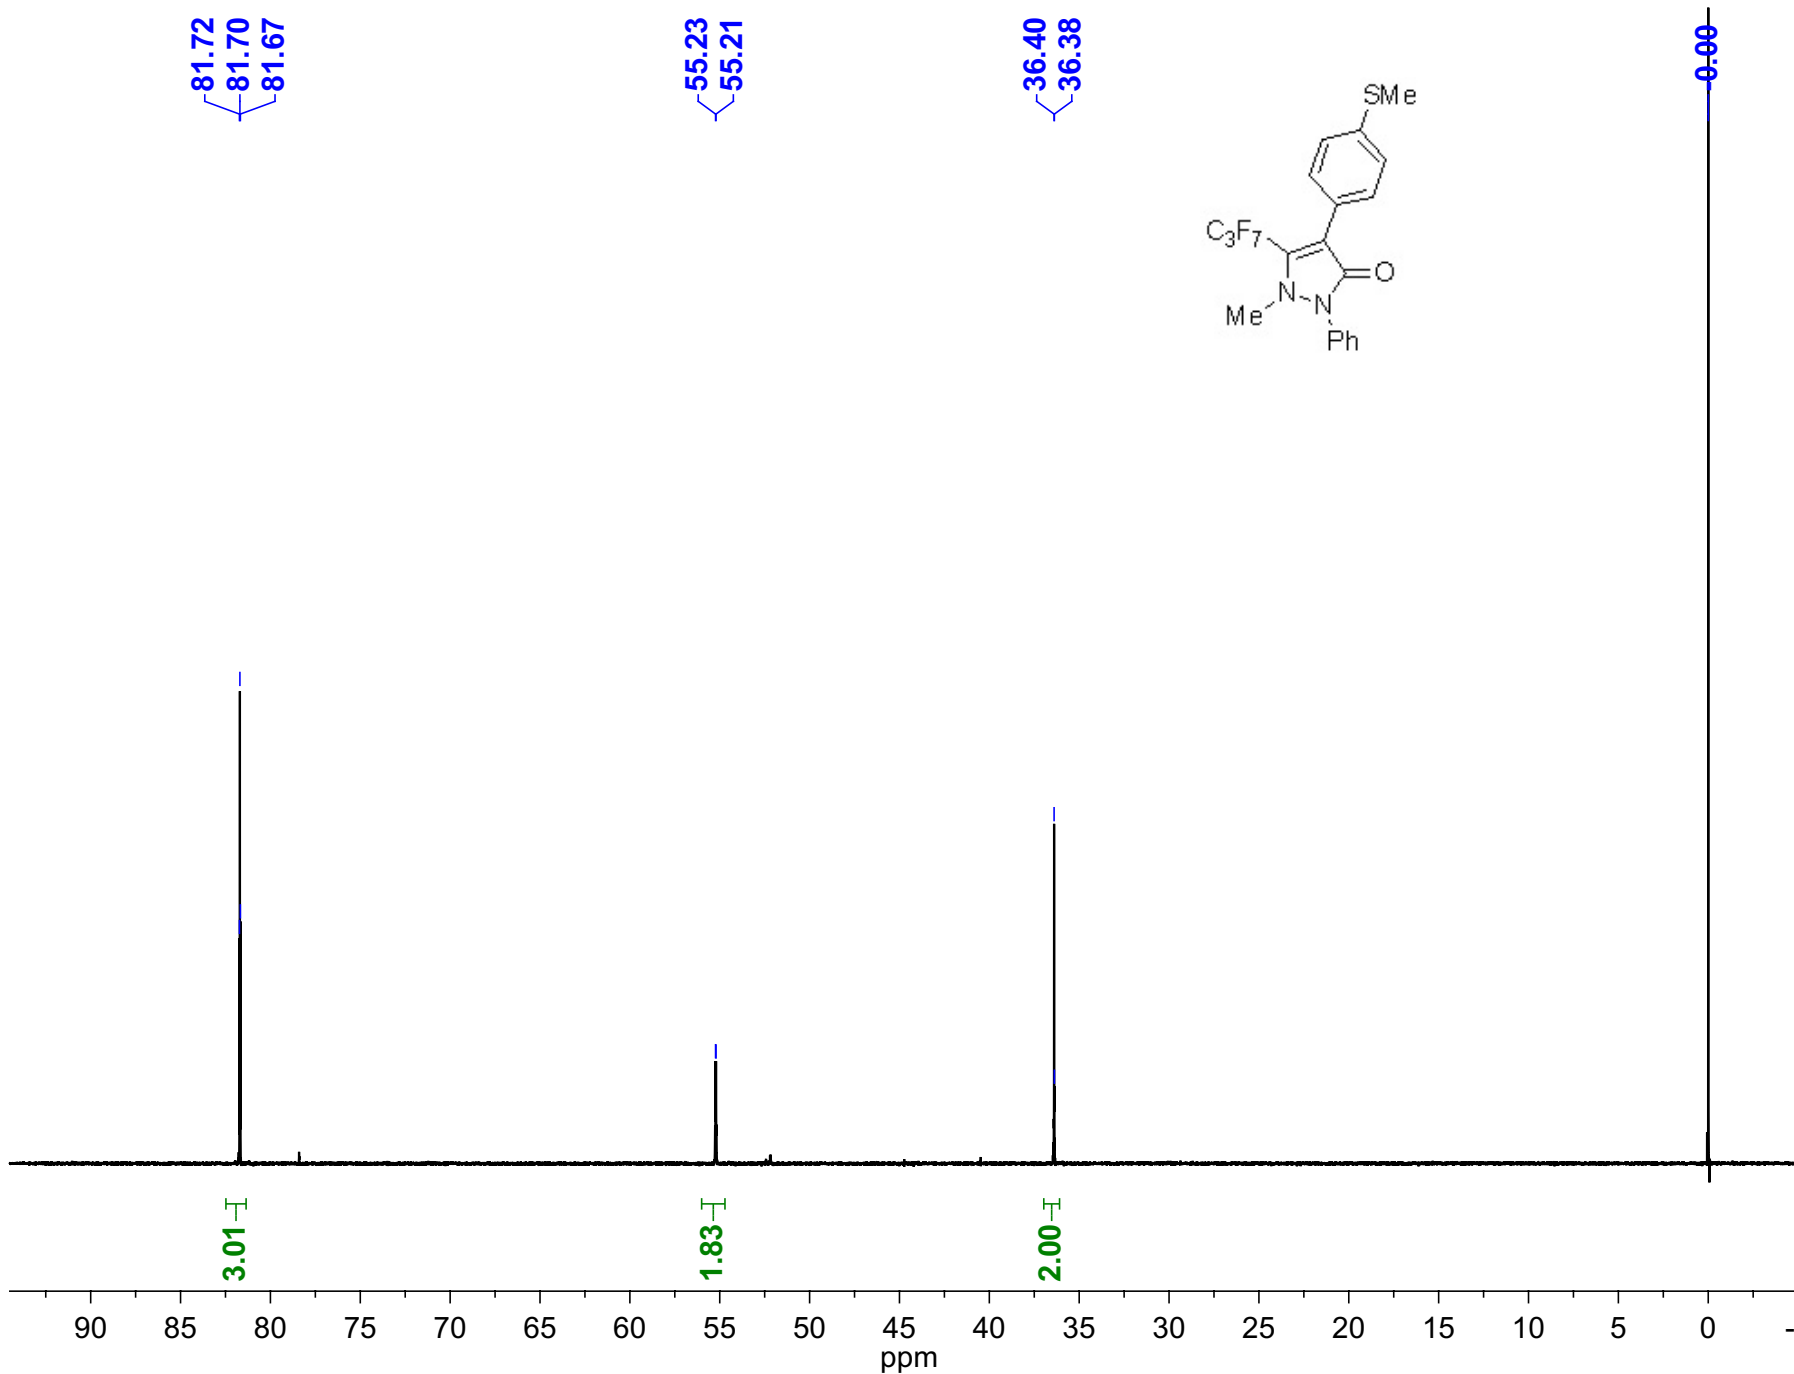

Current Data Parameters

NAME ESh715  
EXPNO 19  
PROCNO 1  
USER uralnmr

F2 - Acquisition Parameters

Date\_ 20200312  
Time 14.42  
INSTRUM DRX400  
PROBHD 5 mm SEF 19F-1  
PULPROG zg30  
TD 131072  
SOLVENT CDCl3  
NS 16  
DS 2  
SWH 37664.785 Hz  
FIDRES 0.287360 Hz  
AQ 1.7400308 sec  
RG 2580.3  
DW 13.275 usec  
DE 6.50 usec  
TE 298.2 K  
D1 1.00000000 sec  
MCREST 0.00000000 sec  
MCWRK 0.01500000 sec

==== CHANNEL f1 =====

NUC1 19F  
P1 10.10 usec  
PL1 0.00 dB  
SFO1 376.4542247 MHz

F2 - Processing parameters

SI 131072  
HZpPT 0.287360 Hz  
SF 376.4374837 MHz  
SR 198.74 Hz  
WDW EM  
LB 0.00 Hz  
GB 0  
SSB 0  
PC 3.00

<sup>1</sup>H NMR spectrum of compound **3i** in CDCl<sub>3</sub>

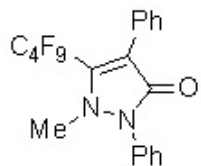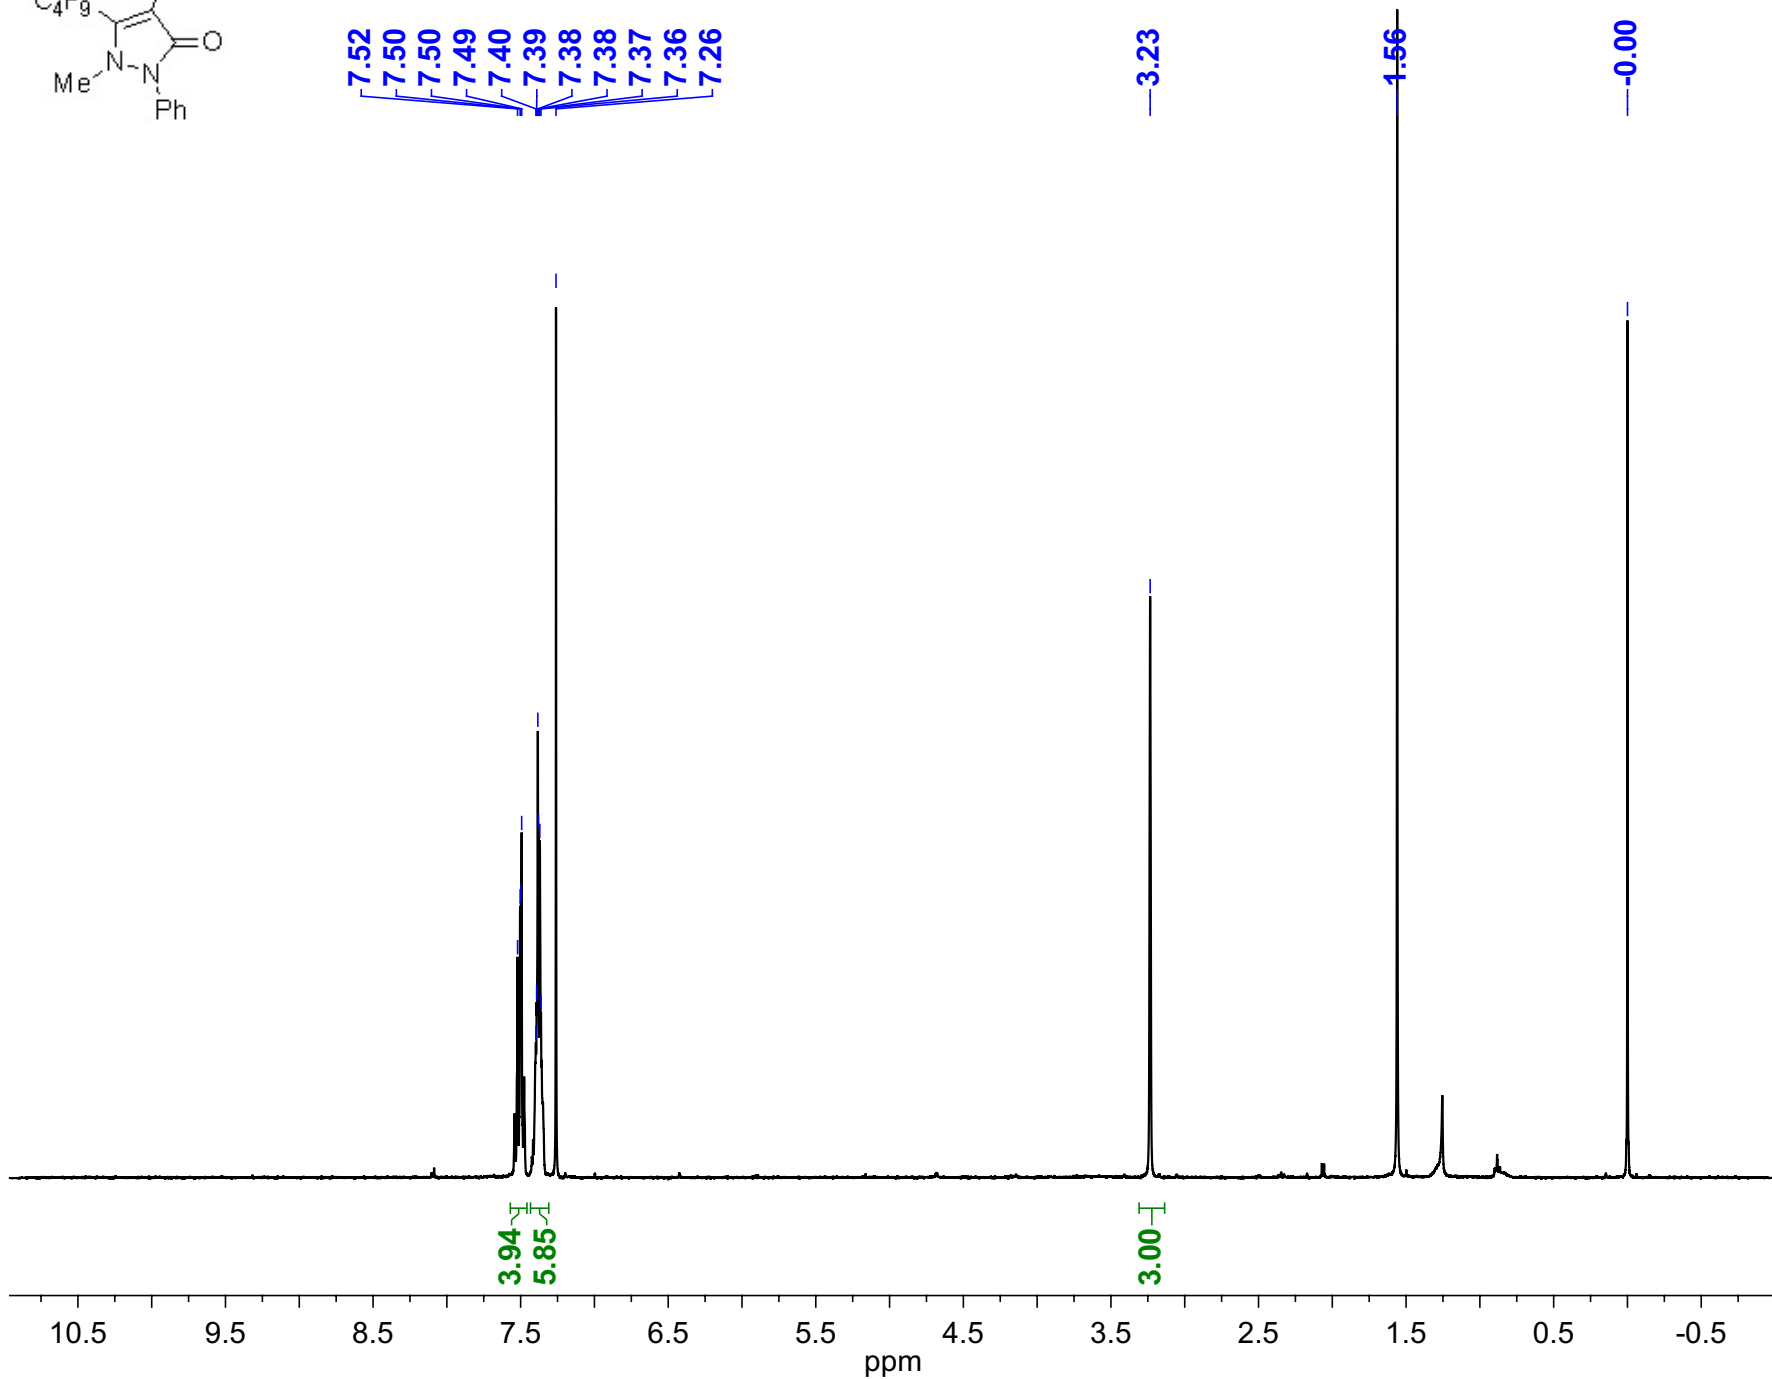

Current Data Parameters

NAME ESh722  
EXPNO 1  
PROCNO 1  
USER uralhmr

F2 - Acquisition Parameters

Date\_ 20200312  
Time 14.49  
INSTRUM DRX400  
PROBHD 5 mm SEF 19F-1  
PULPROG zg30  
TD 32768  
SOLVENT CDCl3  
NS 16  
DS 2  
SWH 4789.272 Hz  
FIDRES 0.146157 Hz  
AQ 3.4210291 sec  
RG 812.7  
DW 104.400 usec  
DE 6.00 usec  
TE 298.2 K  
D1 1.00000000 sec  
MCREST 0.00000000 sec  
MCWRK 0.01500000 sec

==== CHANNEL f1 =====

NUC1 1H  
P1 20.00 usec  
PL1 0.00 dB  
SFO1 400.1320007 MHz

F2 - Processing parameters

SI 32768  
HZpPT 0.146157 Hz  
SF 400.1300093 MHz  
SR 9.28 Hz  
WDW EM  
LB 0.00 Hz  
GB 0  
SSB 0  
PC 4.00

<sup>13</sup>C NMR spectrum of compound **3i** in CDCl<sub>3</sub>

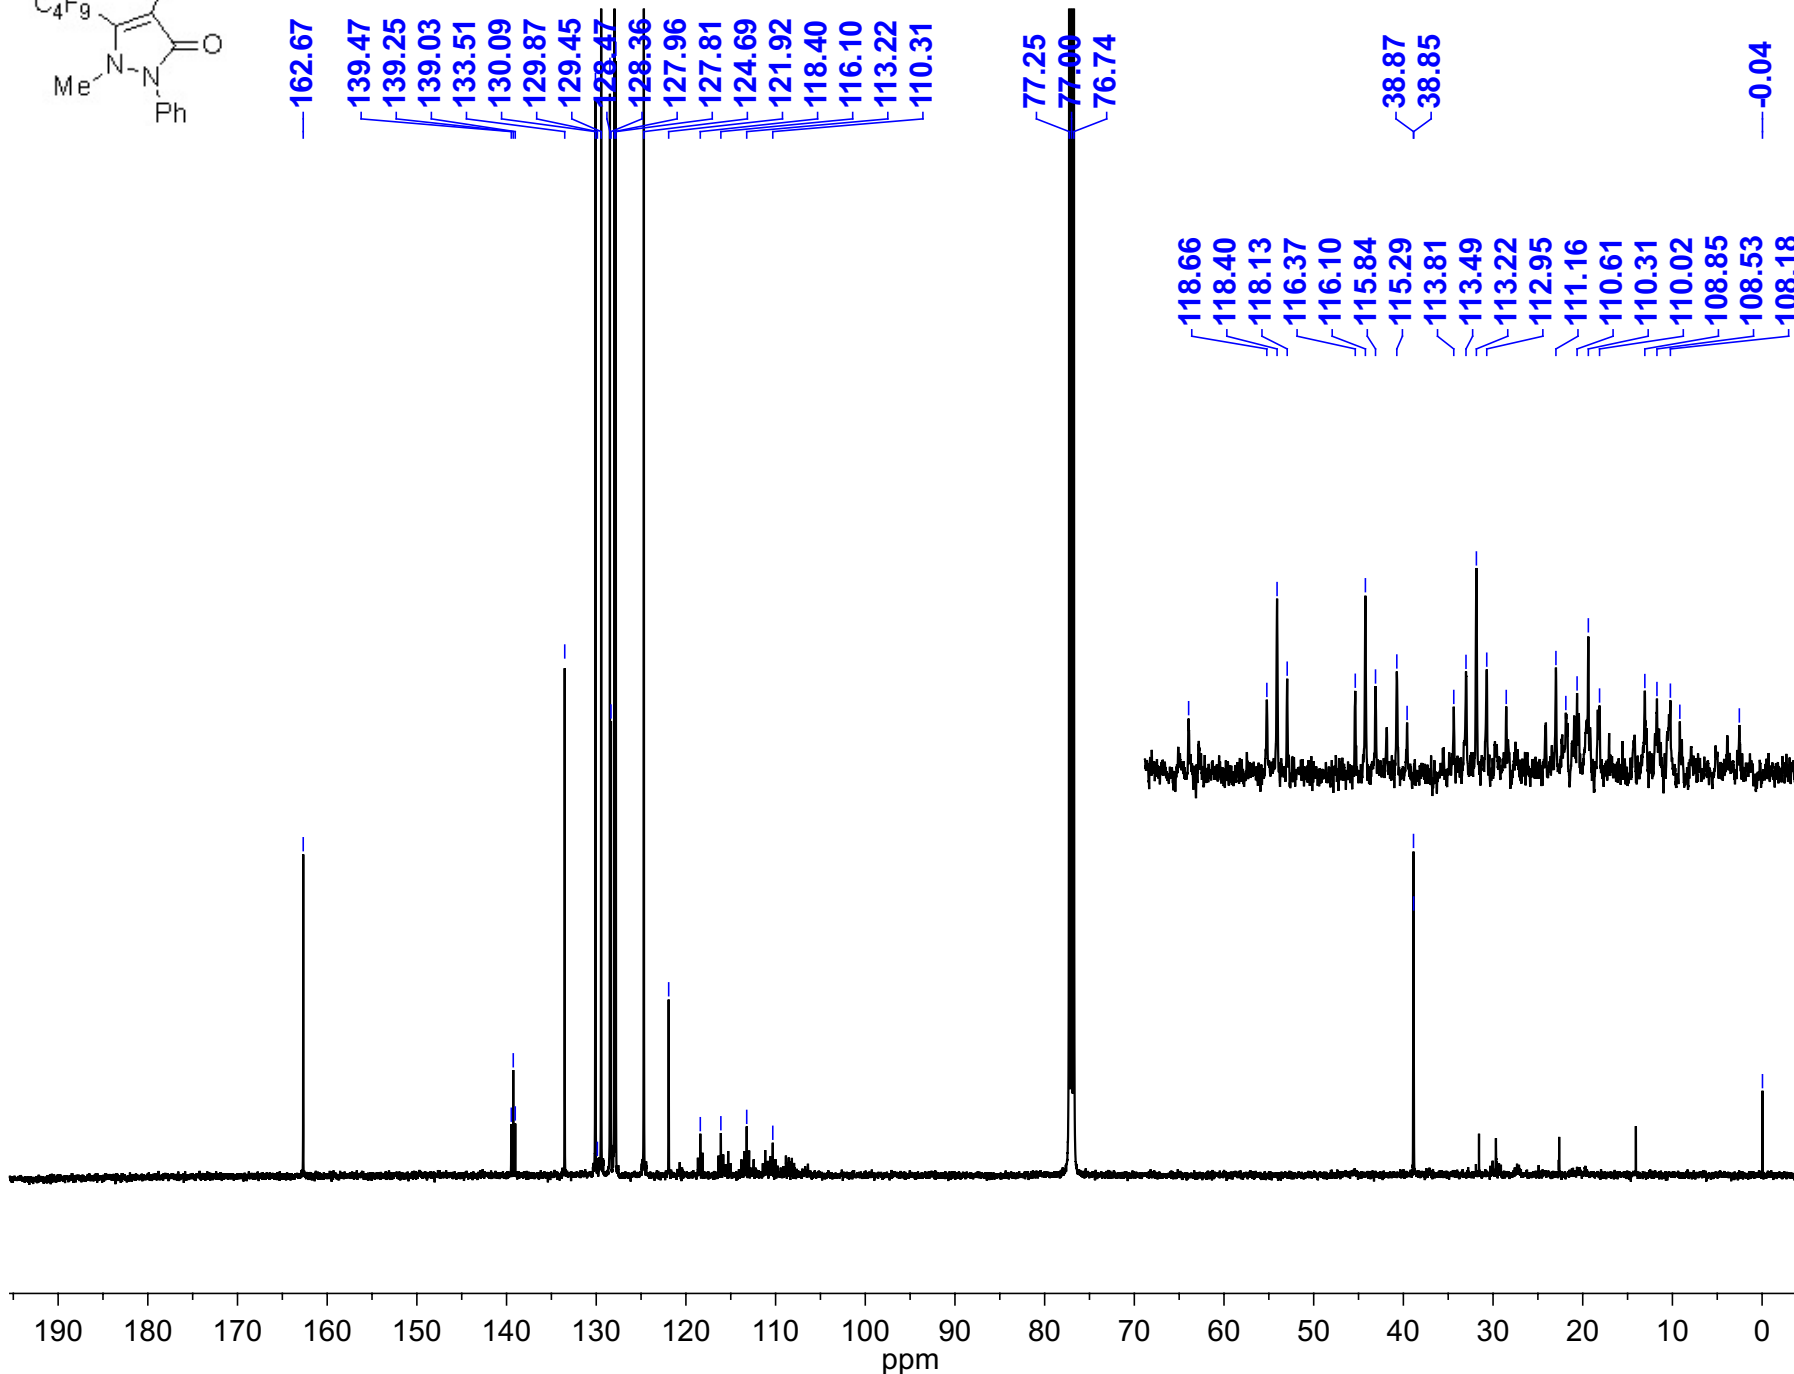

|                        |                 |
|------------------------|-----------------|
| NAME                   | ESh722          |
| EXPNO                  | 13              |
| PROCNO                 | 1               |
| USER                   | uralnmr         |
| Date_                  | 20200320        |
| Time                   | 18.26           |
| INSTRUM                | AV500           |
| PROBHD                 | 5 mm PABBO BB-  |
| PULPROG                | zgpg30          |
| SOLVENT                | CDCl3           |
| TD                     | 65536           |
| SW                     | 200.7838 ppm    |
| O1P                    | 95.000 ppm      |
| FIDRES                 | 0.385323 Hz     |
| NS                     | 32768           |
| DS                     | 8               |
| AQ                     | 1.2976629 sec   |
| RG                     | 203             |
| TE                     | 296.6 K         |
| DE                     | 6.50 usec       |
| D1                     | 1.00000000 sec  |
| D11                    | 0.03000000 sec  |
| TD0                    | 32              |
| ===== CHANNEL f1 ===== |                 |
| NUC1                   | 13C             |
| P1                     | 9.00 usec       |
| PL1                    | 0.00 dB         |
| PL1W                   | 115.29558563 W  |
| SFO1                   | 125.7697360 MHz |
| ===== CHANNEL f2 ===== |                 |
| CPDPRG2                | waltz16         |
| NUC2                   | 1H              |
| PCPD2                  | 75.00 usec      |
| PL2                    | 120.00 dB       |
| PL12                   | 17.00 dB        |
| PL13                   | 20.00 dB        |
| PL2W                   | 0.00000000 W    |
| PL12W                  | 0.40445811 W    |
| PL13W                  | 0.20270923 W    |
| SFO2                   | 500.1320005 MHz |
| SI                     | 131072          |
| HZpPT                  | 0.192661 Hz     |
| SR                     | 1.58 Hz         |
| WDW                    | EM              |
| LB                     | 1.00 Hz         |
| GB                     | 0               |
| SSB                    | 0               |

<sup>19</sup>F NMR spectrum of compound **3I** in CDCl<sub>3</sub>

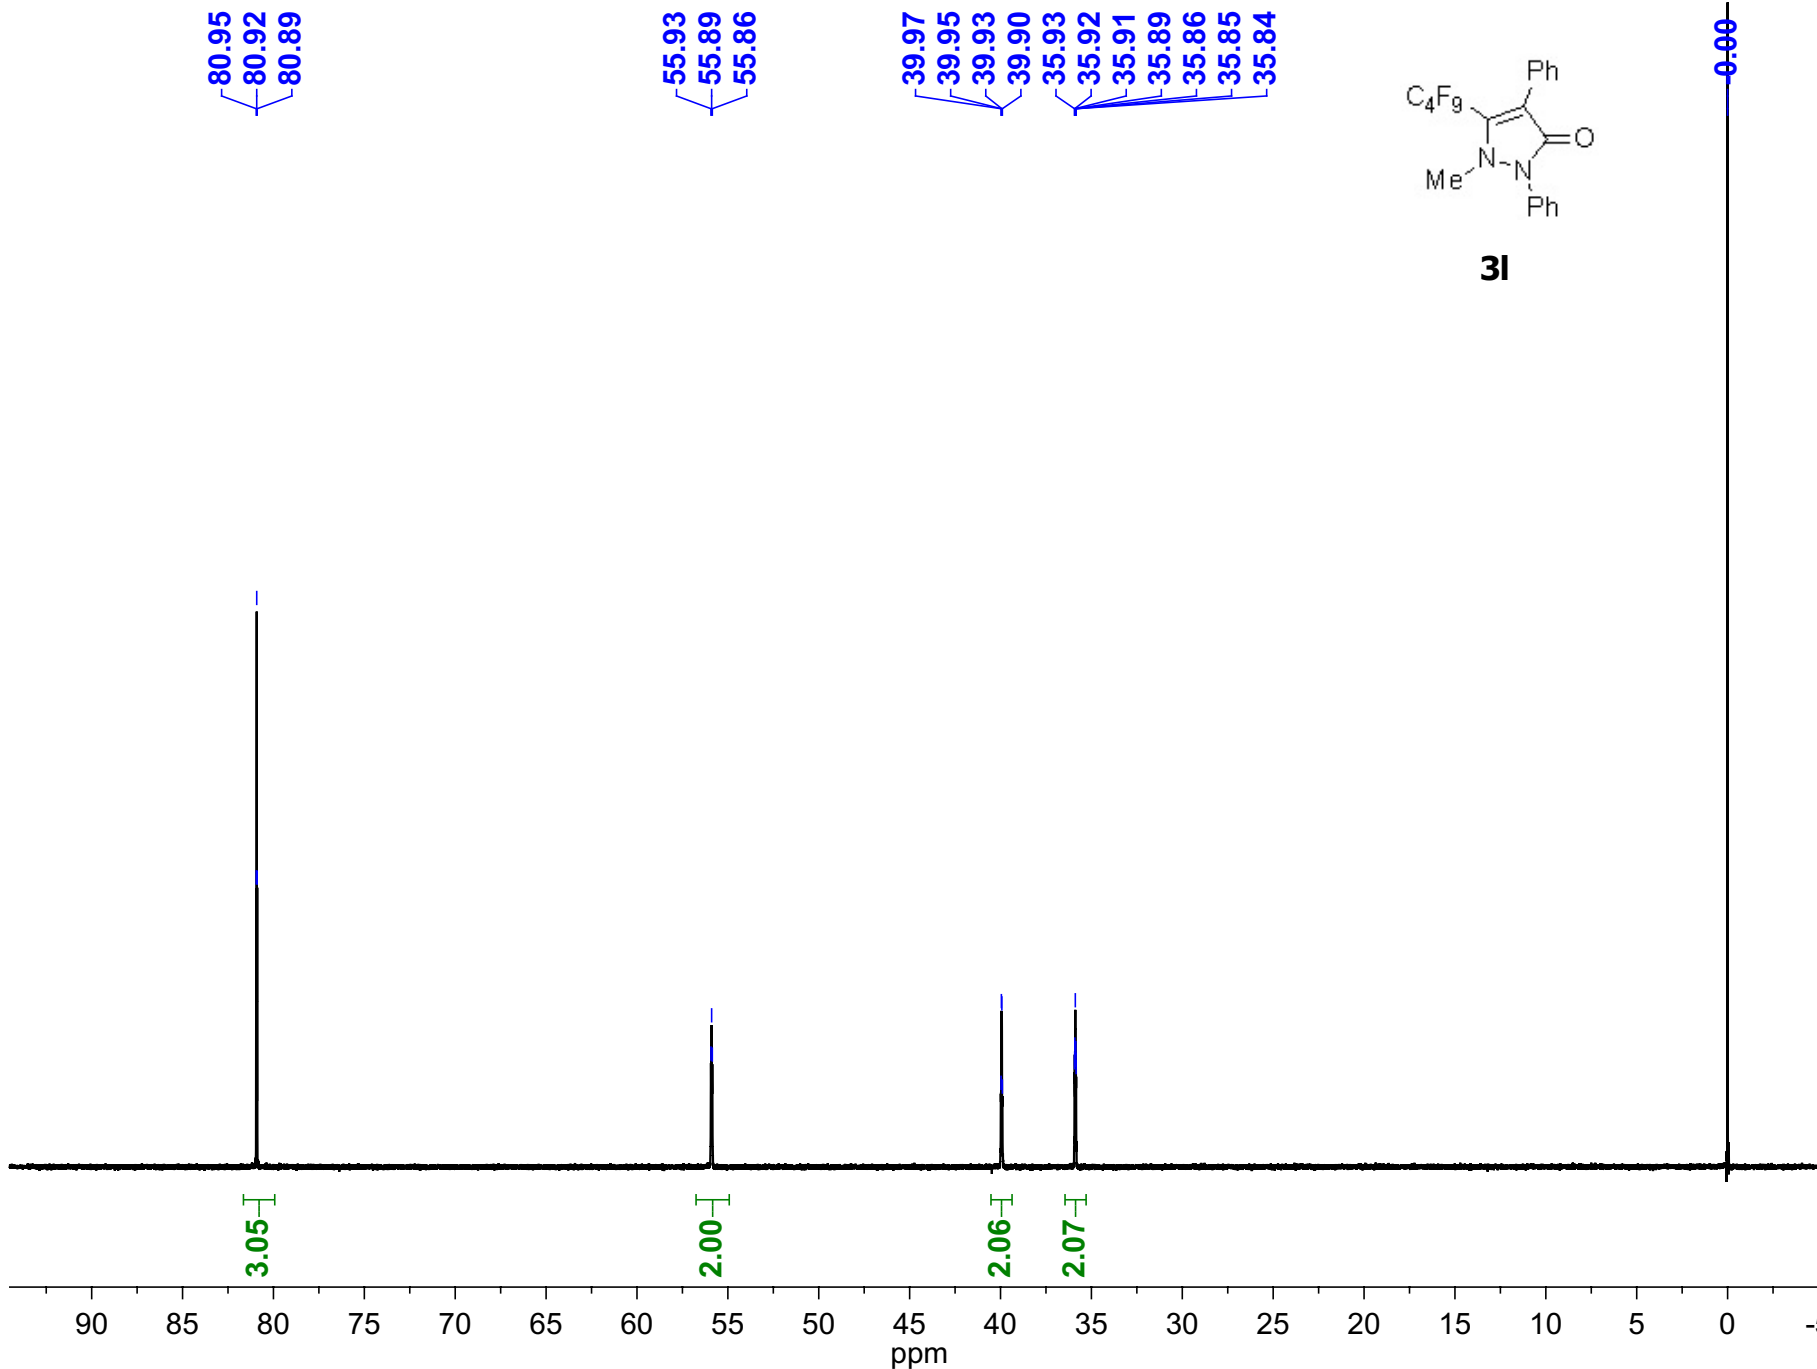

Current Data Parameters  
NAME ESh722  
EXPNO 19  
PROCNO 1  
USER urahmr

F2 - Acquisition Parameters  
Date\_ 20200312  
Time 14.52  
INSTRUM DRX400  
PROBHD 5 mm SEF 19F-1  
PULPROG zg30  
TD 131072  
SOLVENT CDCl<sub>3</sub>  
NS 16  
DS 2  
SWH 37664.785 Hz  
FIDRES 0.287360 Hz  
AQ 1.7400308 sec  
RG 2580.3  
DW 13.275 usec  
DE 6.50 usec  
TE 298.2 K  
D1 1.00000000 sec  
MCREST 0.00000000 sec  
MCWRK 0.01500000 sec

==== CHANNEL f1 =====  
NUC1 19F  
P1 10.10 usec  
PL1 0.00 dB  
SFO1 376.4542247 MHz

F2 - Processing parameters  
SI 131072  
HZpPT 0.287360 Hz  
SF 376.4374823 MHz  
SR 197.29 Hz  
WDW EM  
LB 0.00 Hz  
GB 0  
SSB 0  
PC 3.00



<sup>1</sup>H NMR spectrum of compound **6a** in CDCl<sub>3</sub>

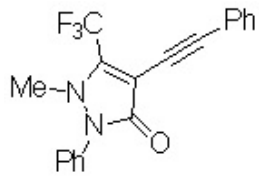

7.55  
7.55  
7.54  
7.54  
7.53  
7.53  
7.51  
7.43  
7.42  
7.41  
7.34  
7.34  
7.33  
7.26

3.27

1.58

-0.00

7.55  
7.55  
7.54  
7.54  
7.53  
7.53  
7.51  
7.43  
7.42  
7.41  
7.34  
7.34  
7.33  
7.26

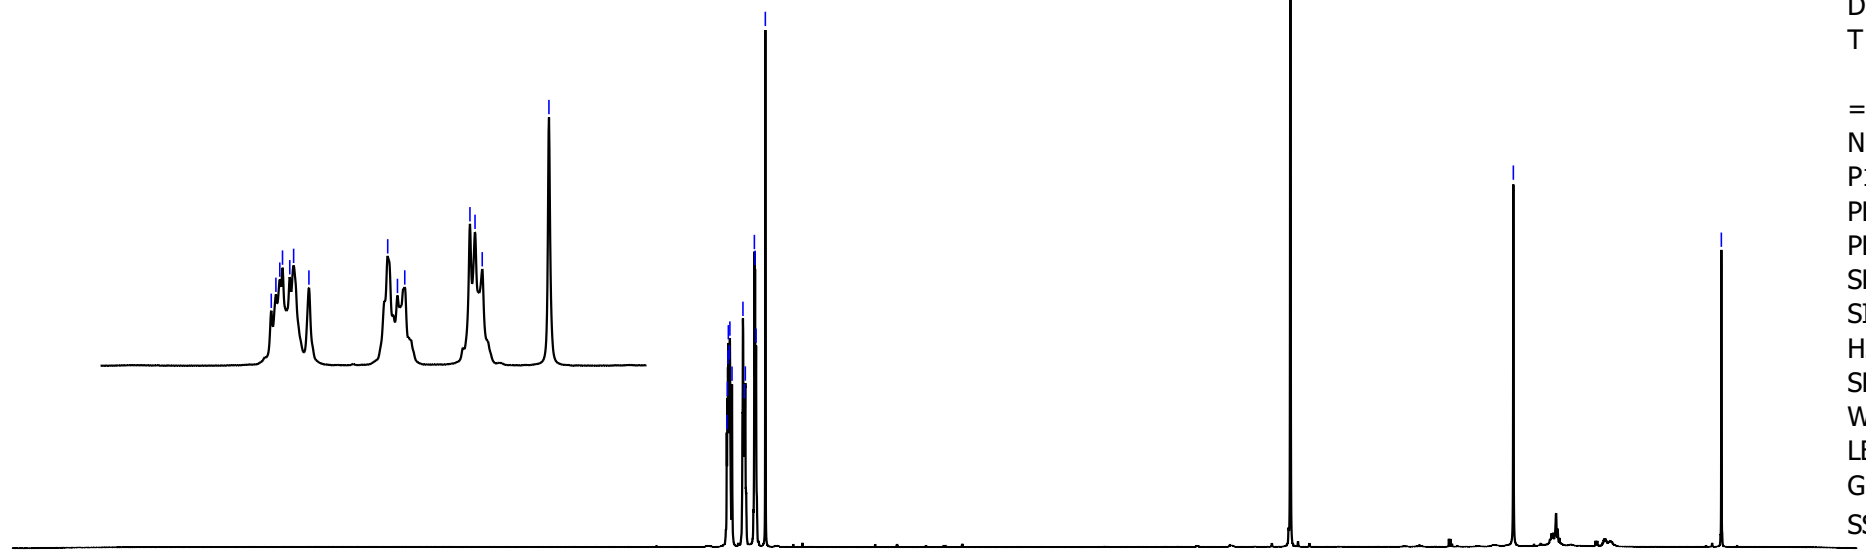

3.86  
2.90  
2.84

3.00

NAME ESh782  
EXPNO 1  
PROCNO 1  
USER uralnmr  
Date\_ 20210322  
Time 14.35  
INSTRUM AV500  
PROBHD 5 mm PABBO BB-  
PULPROG zg30  
SOLVENT CDCl3  
TD 32768  
SW 14.0019 ppm  
O1P 6.000 ppm  
FIDRES 0.213709 Hz  
NS 16  
DS 0  
AQ 2.3396852 sec  
RG 203  
TE 296.3 K  
DE 6.50 usec  
D1 1.00000000 sec  
TD0 1

==== CHANNEL f1 ====  
NUC1 1H  
P1 12.00 usec  
PL1 0.30 dB  
PL1W 18.91792679 W  
SFO1 500.1330008 MHz  
SI 32768  
HZpPT 0.213709 Hz  
SR 12.68 Hz  
WDW EM  
LB 0.00 Hz  
GB 0  
SSB 0

<sup>13</sup>C NMR spectrum of compound **6a** in CDCl<sub>3</sub>

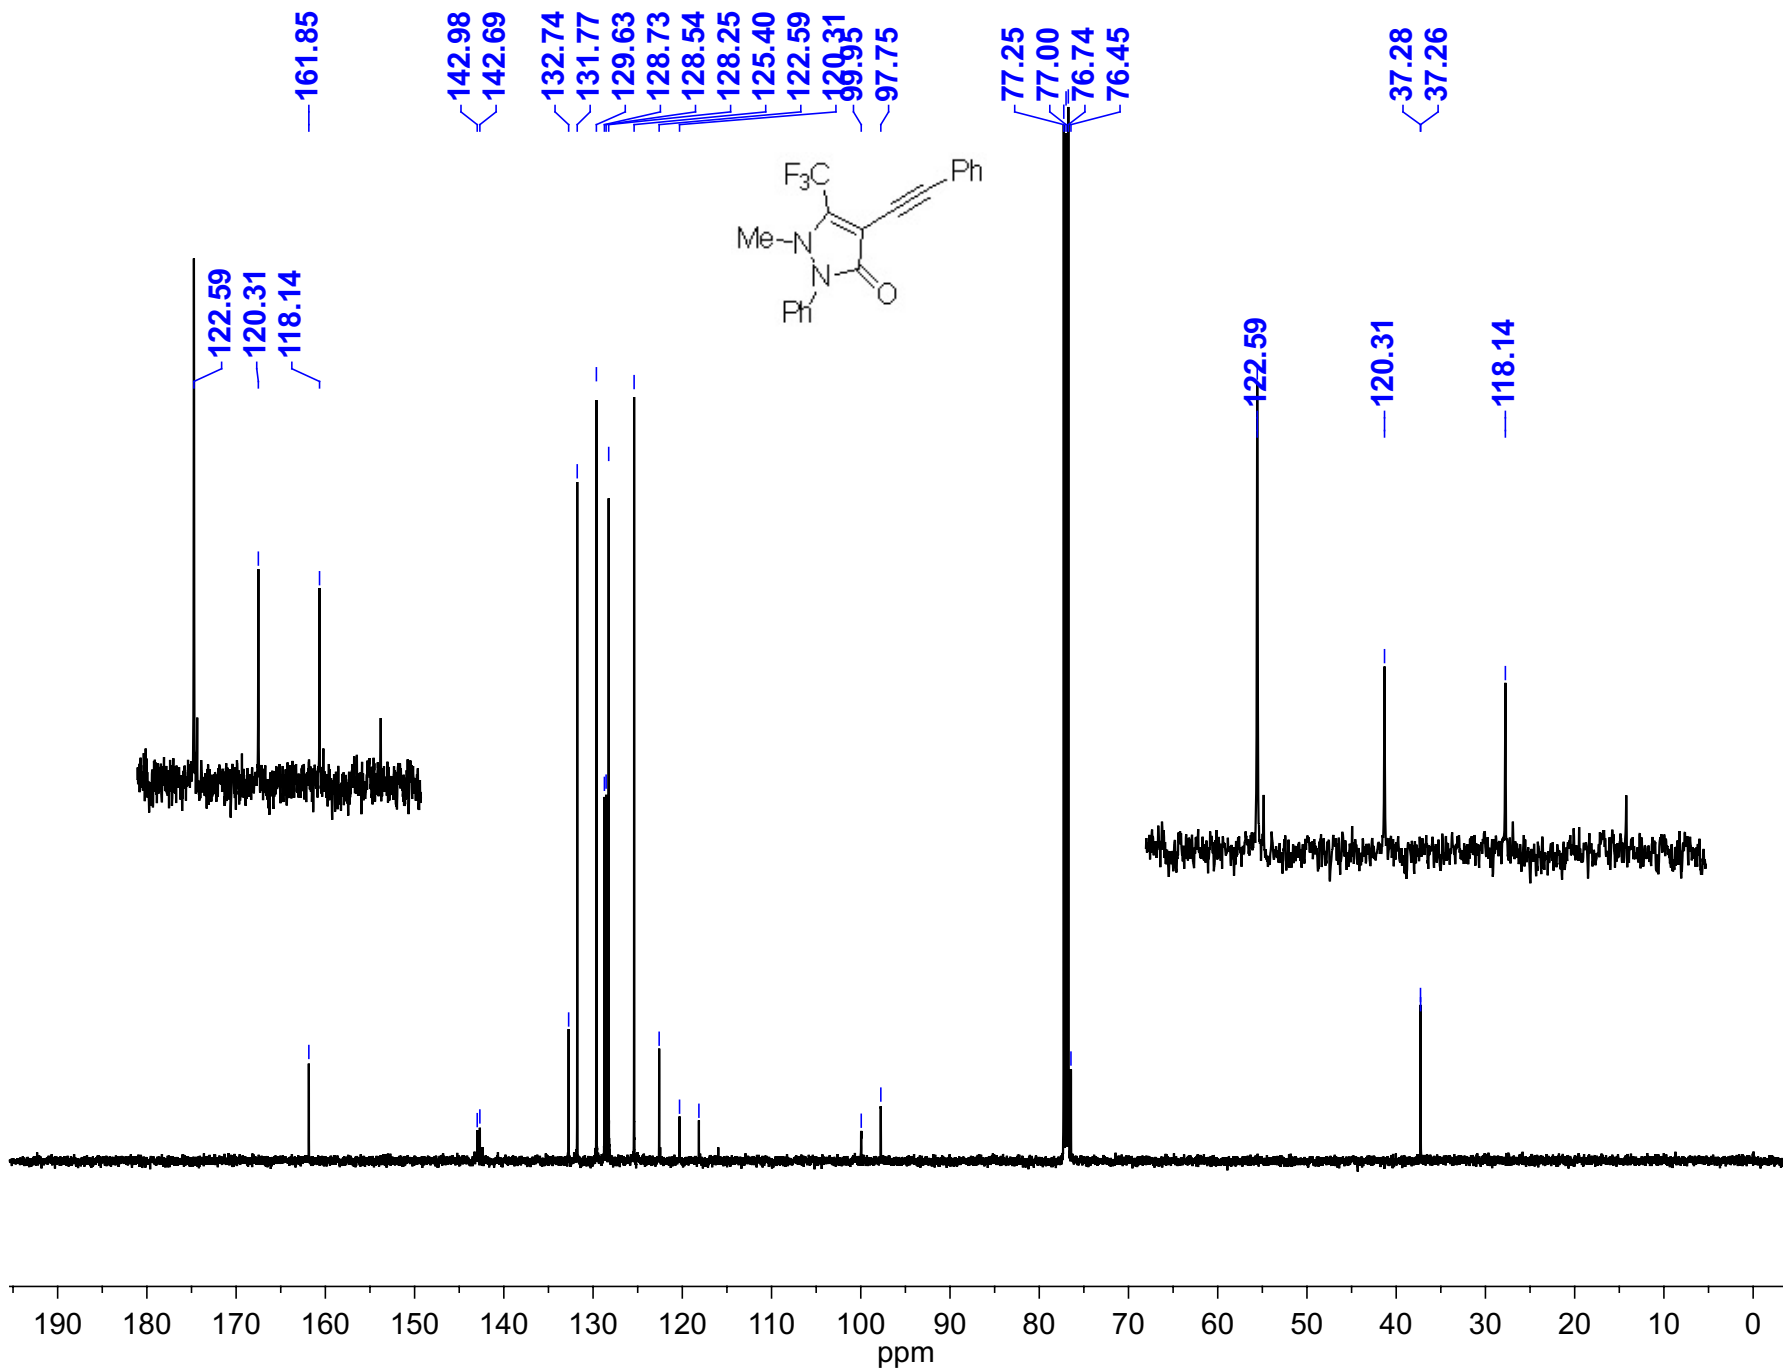

NAME ESI1702  
EXPNO 13  
PROCNO 1  
USER uralnmr  
Date\_ 20210405  
Time 10.56  
INSTRUM AV500  
PROBHD 5 mm PABBO BB-  
PULPROG zgpg30  
SOLVENT CDCl3  
TD 32768  
SW 200.7838 ppm  
O1P 95.000 ppm  
FIDRES 0.770646 Hz  
NS 1024  
DS 8  
AQ 0.6488564 sec  
RG 203  
TE 297.0 K  
DE 6.50 usec  
D1 0.85000002 sec  
D11 0.03000000 sec  
TD0 1

==== CHANNEL f1 =====  
NUC1 13C  
P1 10.00 usec  
PL1 0.00 dB  
PL1W 115.29558563 W  
SFO1 125.7697360 MHz

==== CHANNEL f2 =====  
CPDPRG2 waltz16  
NUC2 1H  
PCPD2 75.00 usec  
PL2 120.00 dB  
PL12 16.30 dB  
PL13 19.30 dB  
PL2W 0.00000000 W  
PL12W 0.47519693 W  
PL13W 0.23816262 W  
SFO2 500.1320005 MHz  
SI 65536  
HZpPT 0.385323 Hz  
SR 5.13 Hz  
WDW EM  
LB 1.00 Hz  
GB 0  
SSB 0

<sup>19</sup>H NMR spectrum of compound **6a** in CDCl<sub>3</sub>

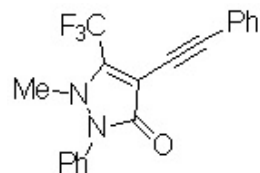

100.83

NAME ESh782  
EXPNO 19  
PROCNO 1  
USER uralnmr  
Date\_ 20210322  
Time 14.37  
INSTRUM AV500  
PROBHD 5 mm PABBO BB-  
PULPROG zg30  
SOLVENT CDCl3  
TD 131072  
SW 120.7506 ppm  
O1P 55.000 ppm  
FIDRES 0.433488 Hz  
NS 8  
DS 2  
AQ 1.1534836 sec  
RG 203  
TE 296.3 K  
DE 6.50 usec  
D1 1.00000000 sec  
TD0 1

==== CHANNEL f1 =====  
NUC1 19F  
P1 15.50 usec  
PL1 -5.00 dB  
PL1W 46.07103729 W  
SFO1 470.5417584 MHz  
SI 131072  
HZpPT 0.433488 Hz  
SR 402.41 Hz  
WDW EM  
LB 0.00 Hz  
GB 0  
SSB 0

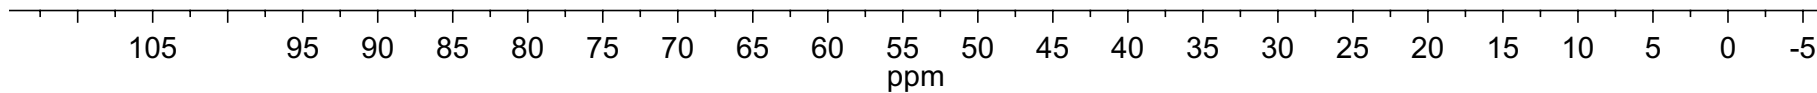

<sup>1</sup>H NMR spectrum of compound **6b** in CDCl<sub>3</sub>

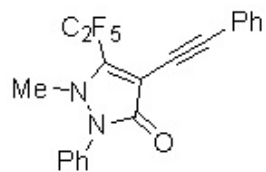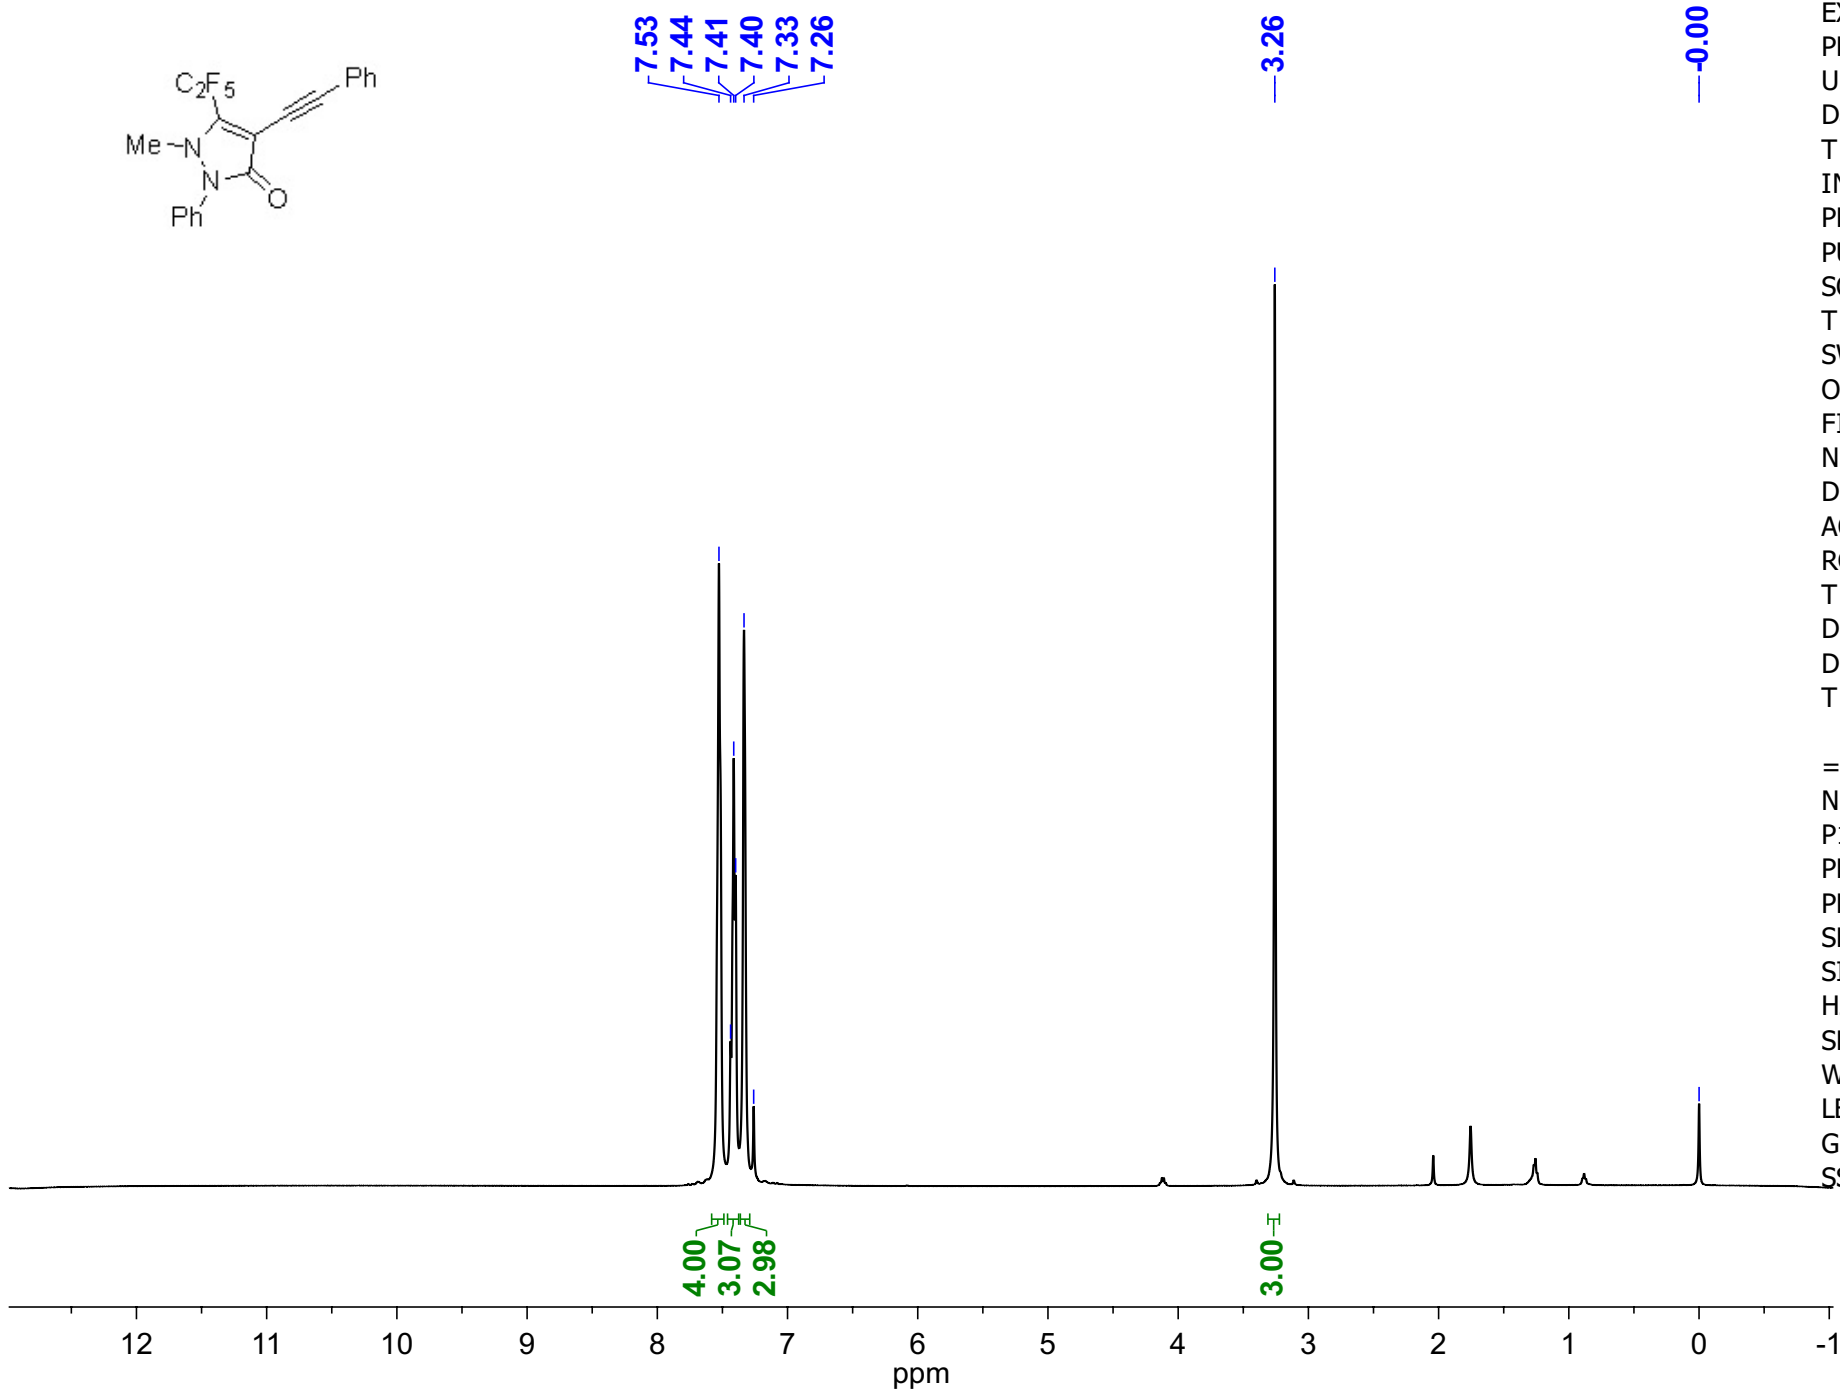

|                       |                 |
|-----------------------|-----------------|
| NAME                  | ESh824          |
| EXPNO                 | 1               |
| PROCNO                | 1               |
| USER                  | uralhmr         |
| Date_                 | 20210809        |
| Time                  | 17.38           |
| INSTRUM               | AV500           |
| PROBHD                | 5 mm PABBO BB-  |
| PULPROG               | zg30            |
| SOLVENT               | CDCl3           |
| TD                    | 32768           |
| SW                    | 14.0019 ppm     |
| O1P                   | 6.000 ppm       |
| FIDRES                | 0.213709 Hz     |
| NS                    | 16              |
| DS                    | 2               |
| AQ                    | 2.3396852 sec   |
| RG                    | 101             |
| TE                    | 295.1 K         |
| DE                    | 6.50 usec       |
| D1                    | 1.50000000 sec  |
| TD0                   | 1               |
| ==== CHANNEL f1 ===== |                 |
| NUC1                  | 1H              |
| P1                    | 12.00 usec      |
| PL1                   | 0.30 dB         |
| PL1W                  | 18.91792679 W   |
| SFO1                  | 500.1330008 MHz |
| SI                    | 32768           |
| HZpPT                 | 0.213709 Hz     |
| SR                    | 12.89 Hz        |
| WDW                   | EM              |
| LB                    | 0.00 Hz         |
| GB                    | 0               |
| SSB                   | 0               |

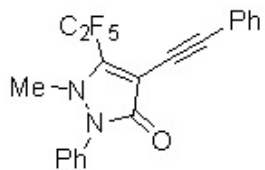

<sup>13</sup>C NMR spectrum of compound **6b** in CDCl<sub>3</sub>

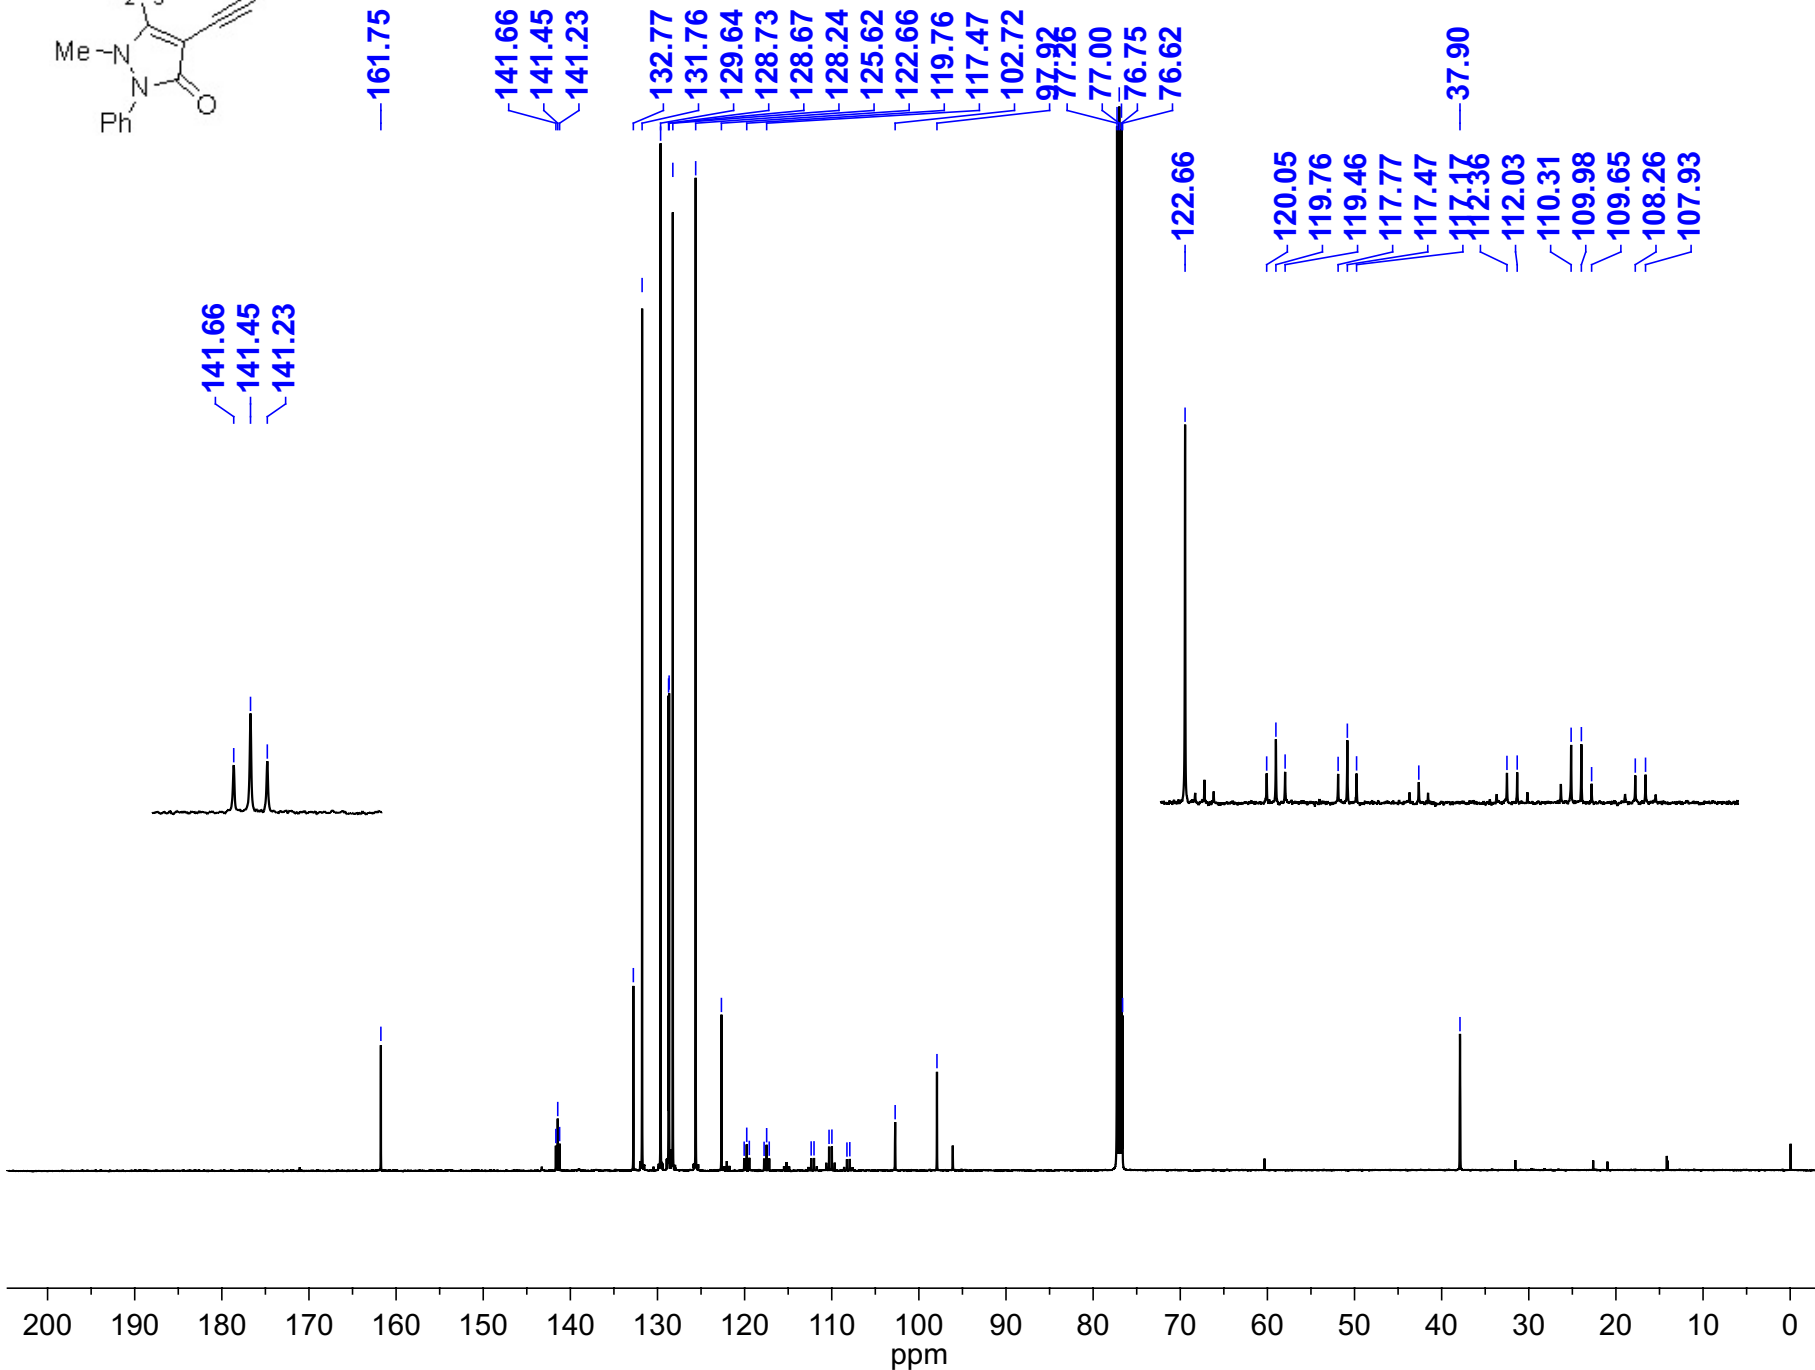

|         |                |
|---------|----------------|
| NAME    | ESh824         |
| EXPNO   | 13             |
| PROCNO  | 1              |
| USER    | uralnmr        |
| Date_   | 20210809       |
| Time    | 18.01          |
| INSTRUM | AV500          |
| PROBHD  | 5 mm PABBO BB- |
| PULPROG | zgpg30         |
| SOLVENT | CDCl3          |
| TD      | 65536          |
| SW      | 209.2368 ppm   |
| O1P     | 100.000 ppm    |
| FIDRES  | 0.401547 Hz    |
| NS      | 24576          |
| DS      | 8              |
| AQ      | 1.2452340 sec  |
| RG      | 203            |
| TE      | 296.3 K        |
| DE      | 6.50 usec      |
| D1      | 1.00000000 sec |
| D11     | 0.03000000 sec |
| TD0     | 24             |

==== CHANNEL f1 =====

|      |                 |
|------|-----------------|
| NUC1 | 13C             |
| P1   | 10.00 usec      |
| PL1  | 0.00 dB         |
| PL1W | 115.29558563 W  |
| SFO1 | 125.7703648 MHz |

==== CHANNEL f2 =====

|         |                 |
|---------|-----------------|
| CPDPRG2 | waltz16         |
| NUC2    | 1H              |
| PCPD2   | 75.00 usec      |
| PL2     | 120.00 dB       |
| PL12    | 16.30 dB        |
| PL13    | 19.30 dB        |
| PL2W    | 0.00000000 W    |
| PL12W   | 0.47519693 W    |
| PL13W   | 0.23816262 W    |
| SFO2    | 500.1320005 MHz |
| SI      | 32768           |
| HZpPT   | 0.803094 Hz     |
| SR      | 3.29 Hz         |
| WDW     | EM              |
| LB      | 1.00 Hz         |
| GB      | 0               |
| SSB     | 0               |

<sup>19</sup>F NMR spectrum of compound **6b** in CDCl<sub>3</sub>

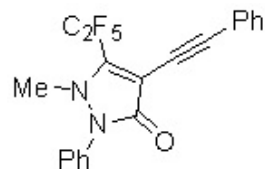

NAME ESh824  
EXPNO 19  
PROCNO 1  
USER uralnmr  
Date\_ 20210809  
Time 17.44  
INSTRUM AV500  
PROBHD 5 mm PABBO BB-  
PULPROG zg30  
SOLVENT CDCl3  
TD 131072  
SW 99.6202 ppm  
O1P 45.000 ppm  
FIDRES 0.357628 Hz  
NS 16  
DS 2  
AQ 1.3981513 sec  
RG 203  
TE 295.1 K  
DE 6.50 usec  
D1 1.00000000 sec  
TD0 1

==== CHANNEL f1 =====  
NUC1 19F  
P1 15.50 usec  
PL1 -5.00 dB  
PL1W 46.07103729 W  
SFO1 470.5370532 MHz  
SI 131072  
HZpPT 0.357628 Hz  
SR 395.82 Hz  
WDW EM  
LB 0.00 Hz  
GB 0  
SSB 0

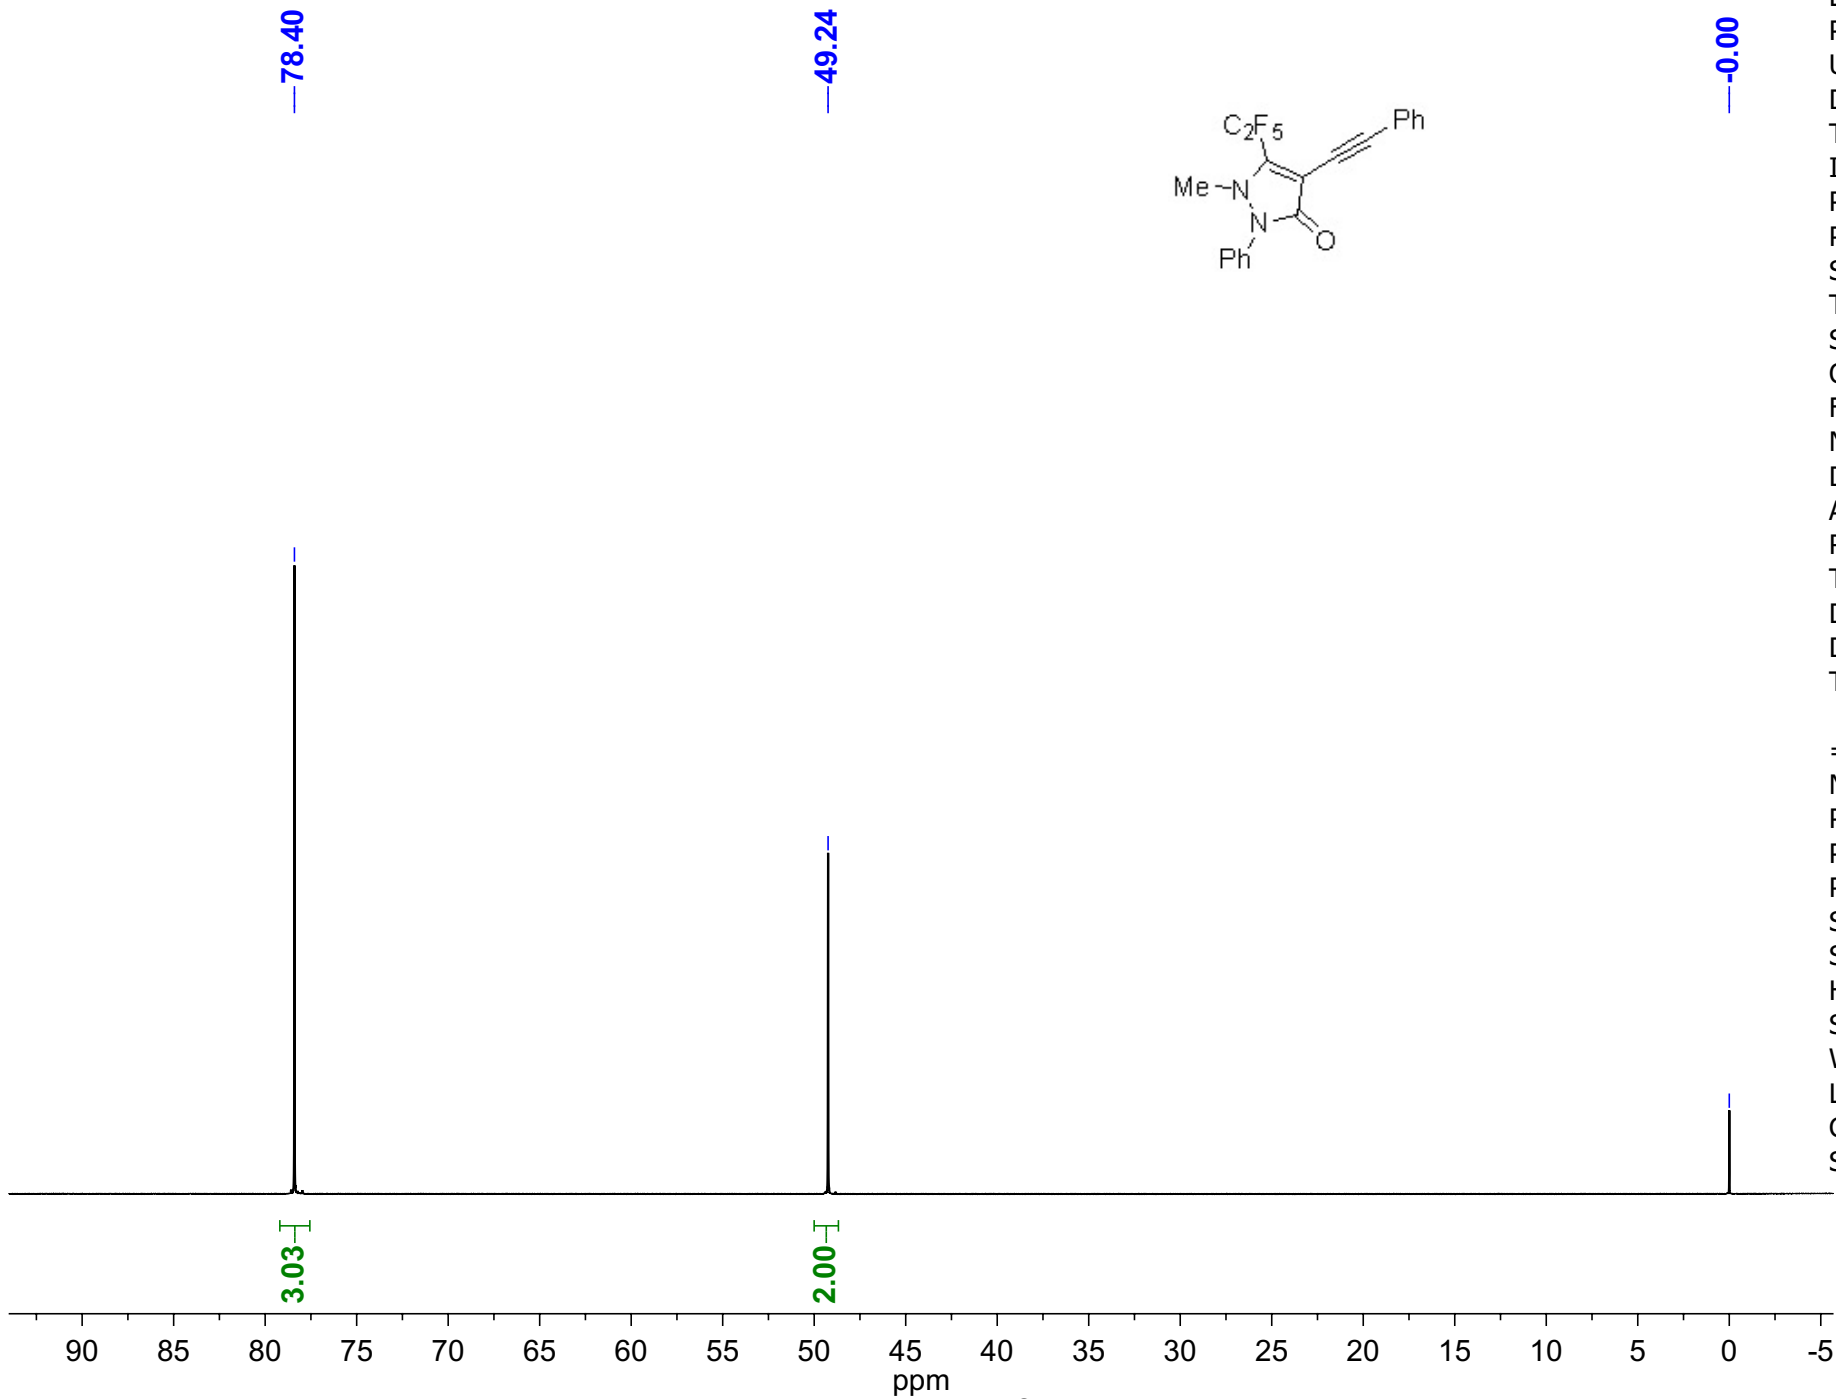

Supplement: d1ra06967e1.pdf [file d1ra06967e1.pdf]
